# Supplementary material for: CAMS-REG-v4: a state-of-the-art high-resolution European emission inventory for air quality modelling
Source: Copernicus journal article supplement (doi:10.5194/essd-2021-242), 2021-08-30
Supplement: Supplementary file 2 [file CAMS-REG-v4_2_paper_SI_Tables.xlsx]

## Sheet: Readme
CAMS-REG-v4: a state-of-the-art high-resolution European emission inventory for air quality modelling
Jeroen Kuenen1, Stijn Dellaert1, Antoon Visschedijk1, Jukka-Pekka Jalkanen2, Ingrid Super1, Hugo Denier van der Gon1
1TNO, Department of Climate, Air and Sustainability, Princetonlaan 6, 3584CB Utrecht, The Netherlands
2FMI, Department of Atmospheric Composition Research, P.O. Box 503, FI-00101 Helsinki, Finland
Correspondence to: Jeroen Kuenen (Jeroen.Kuenen@tno.nl)
Supplementary information
This file contains the Tables S1-S7. For specific Chapters in the SI please refer to the MS Word SI file.
Table S1	Definition of the sector and fuel classifications used in this study
Table S2	Link between the sectoral classification used in this study and the official reported emissions for air pollutants (NFR classification)
Table S3	Link between the sectoral and fuel classification used in this study and the official reported emissions for greenhouse gases (CRF classification)
Table S4	Link between the sectoral and fuel classification used in this study and the GAINS emission sectors and fuels
Table S5	Distribution proxy used for each sector and fuel
Table S6	Definition of country groups
Table S7	Total emissions per country, country group, pollutant, year and sector

## Sheet: TableS1
SectorID	SectorName	GNFR		FuelID	FuelName		GNFR	GNFR_Name
1000	ENERGY INDUSTRY			100	Solid fuels (non biomass)		A	Public electricity and heat production
1100	Public electricity and heat production	A		110	Hard coal		B	Industry
1200	Oil and gas refining	B		111	Patent Fuels		C	Small combustion
1210	Oil and gas refining (comb)	B		112	Anthracite		D	Fugitives
1220	Oil and gas refining	B		113	Coking Coal		E	Product/solvent use
1300	Manufacture of solid fuels and other energy industries	B		114	Other Bituminous Coal		F1	Road transport exhaust, gasoline
1310	Coal mining (comb)	B		115	Sub-bituminous Coal		F2	Road transport exhaust, diesel
1320	Oil production (comb)	B		120	Coke		F3	Road transport exhaust, LPG/natural gas
1330	Natural gas production (comb)	B		121	Coke Oven Coke		F4	Road transport non-exhaust
1340	Coke ovens (comb)	B		122	Gas Coke		G	Shipping
1400	Fugitive emissions from solid fuels	D		130	Lignite/Brown Coal		H	Aviation
1410	Coal mining and handling	D		140	Peat (incl. peat products)		I	Other mobile sources
1420	Coke ovens	B		150	Other solid fuels		J	Waste treatment
1430	Other	D		151	Coal tar		K	Agriculture, livestock
1500	Fugitive emissions from oil	D		152	BKB		L	Agriculture, other
1510	Exploration, production, transport	D		153	Oil shale and oil sands
1520	Distribution of oil products	D		154	Charcoal
1600	Fugitive emissions from gas	D		200	Liquid fuels (non biomass)
1610	Natural gas - production	D		210	Crude oil and feedstocks
1620	Natural gas - high pressure distribution	D		220	LPG
1630	Natural gas - low pressure distribution	D		230	Gasoline
1700	Venting and flaring (oil, gas, combined oil and gas)	D		240	Kerosene
1800	Other fugitive emissions	D		250	Gas/diesel oil
1810	Other fugitive emissions from energy production	D		260	Heavy fuel oil
1820	Transport of CO2	D		270	Other petroleum products
1830	Injection and storage	D		271	Refinery gas
2000	MANUFACTURING INDUSTRY AND PRODUCT USE			272	Ethane
2100	Iron and steel industry	B		273	Naphtha
2110	Iron and steel industry (comb)	B		274	White spirit
2120	Iron and steel production	B		275	Lubricants
2121	Iron and steel industry, coke ovens	B		276	Bitumen
2122	Iron and steel industry, sinter production	B		277	Petroleum coke
2123	Iron and steel industry, pellet production	B		278	Other
2124	Iron and steel industry, pig iron	B		300	Gaseous fuels (non biomass)
2125	Iron and steel industry, cast iron	B		310	Natural gas
2126	Iron and steel industry, basic oxygen furnace	B		320	Other gases
2127	Iron and steel industry, open hearth furnace	B		321	Coke oven gas
2128	Iron and steel industry, electric arc furnace	B		322	Blast furnace gas
2129	Ferroalloys production	B		323	Gas works gas
2200	Non-ferrous metal industry	B		324	Other gases
2210	Non-ferrous metals (comb)	B		400	Biomass
2220	Aluminium production	B		410	Wood or wood waste
2230	Other non ferrous metal production	B		420	Biogasoline
2231	Magnesium production	B		430	Biodiesel
2232	Lead production	B		440	Biogas
2233	Zinc production	B		450	Waste (renewable part)
2234	Storage and handling of metal products	B		460	Other renewables
2235	Other non ferrous metal production	B		500	Waste (non-renewable)
2300	Chemical industry	B		510	Industrial waste
2310	Chemical industry (comb)	B		520	Other waste
2320	Chemical industry	B
2321	Ammonia production	B
2322	Nitric acid production	B
2323	Adipic acid production	B
2324	Carbide production	B
2325	Titanium dioxide production	B
2326	Soda ash production	B
2327	Storage and handling of chemical products	B
2328	Other chemical production	B
2400	Pulp and paper industry	B
2410	Pulp and paper industry (comb)	B
2420	Pulp and paper industry	B
2500	Food and beverages industry	B
2510	Food processing, beverages and tobacco (comb)	B
2520	Food and beverages industry	B
2600	Non-metallic mineral industry	B
2610	Non-metallic minerals (combustion)	B
2620	Cement production	B
2630	Other non metallic mineral production	B
2631	Lime production	B
2632	Glass production	B
2633	Other process uses of carbonates	B
2634	Quarrying and mining of minerals other than coal	B
2635	Construction and demolition	B
2636	Storage and handling of mineral products	B
2637	Other mineral industry	B
2700	Product use	E
2710	Solvent use	E
2711	Domestic solvent use including fungicides	E
2712	Coating applications	E
2713	Degreasing	E
2714	Dry cleaning	E
2715	Chemical products	E
2716	Printing	E
2717	Other solvent use	E
2720	Non-solvent product use	E
2721	Paraffin wax use	E
2722	Road paving with asphalt	B
2723	Asphalt roofing	B
2724	Other product use	E
2800	Other industry	B
2810	Other manufacturing industry (comb)	B
2820	Other industrial processes	B
3000	ROAD TRANSPORT
3100	Passenger cars	F1-3*
3110	Passenger cars - highway	F1-3*
3120	Passenger cars - urban	F1-3*
3130	Passenger cars - rural	F1-3*
3200	Light duty vehicles	F1-3*
3210	Light duty vehicles - highway	F1-3*
3220	Light duty vehicles - urban	F1-3*
3230	Light duty vehicles - rural	F1-3*
3300	Trucks (>3.5t)	F1-3*
3310	Trucks (>3.5t) - highway	F1-3*
3320	Trucks (>3.5t) - urban	F1-3*
3330	Trucks (>3.5t) - rural	F1-3*
3400	Buses	F1-3*
3410	Buses - highway	F1-3*
3420	Buses - urban	F1-3*
3430	Buses - rural	F1-3*
3500	Motorcycles	F1-3*
3510	Motorcycles - highway	F1-3*
3520	Motorcycles - urban	F1-3*
3530	Motorcycles - rural	F1-3*
3600	Mopeds	F1-3*
3610	Mopeds - highway	F1-3*
3620	Mopeds - urban	F1-3*
3630	Mopeds - rural	F1-3*
3700	Brake wear	F4
3710	Brake wear - Passenger cars	F4
3711	Brake wear - Passenger cars - highway	F4
3712	Brake wear - Passenger cars - urban	F4
3713	Brake wear - Passenger cars - rural	F4
3720	Brake wear - LDV	F4
3721	Brake wear - LDV - highway	F4
3722	Brake wear - LDV - urban	F4
3723	Brake wear - LDV - rural	F4
3730	Brake wear - Trucks (>3.5t)	F4
3731	Brake wear - Trucks (>3.5t) - highway	F4
3732	Brake wear - Trucks (>3.5t) - urban	F4
3733	Brake wear - Trucks (>3.5t) - rural	F4
3740	Brake wear - Buses	F4
3741	Brake wear - Buses - highway	F4
3742	Brake wear - Buses - urban	F4
3743	Brake wear - Buses - rural	F4
3750	Brake wear - Motorcycles	F4
3751	Brake wear - Motorcycles - highway	F4
3752	Brake wear - Motorcycles - urban	F4
3753	Brake wear - Motorcycles - rural	F4
3760	Brake wear - Mopeds	F4
3761	Brake wear - Mopeds - highway	F4
3762	Brake wear - Mopeds - urban	F4
3763	Brake wear - Mopeds - rural	F4
3800	Tyre wear	F4
3810	Tyre wear - Passenger cars	F4
3811	Tyre wear - Passenger cars - highway	F4
3812	Tyre wear - Passenger cars - urban	F4
3813	Tyre wear - Passenger cars - rural	F4
3820	Tyre wear - LDV	F4
3821	Tyre wear - LDV - highway	F4
3822	Tyre wear - LDV - urban	F4
3823	Tyre wear - LDV - rural	F4
3830	Tyre wear - Trucks (>3.5t)	F4
3831	Tyre wear - Trucks (>3.5t) - highway	F4
3832	Tyre wear - Trucks (>3.5t) - urban	F4
3833	Tyre wear - Trucks (>3.5t) - rural	F4
3840	Tyre wear - Buses	F4
3841	Tyre wear - Buses - highway	F4
3842	Tyre wear - Buses - urban	F4
3843	Tyre wear - Buses - rural	F4
3850	Tyre wear - Motorcycles	F4
3851	Tyre wear - Motorcycles - highway	F4
3852	Tyre wear - Motorcycles - urban	F4
3853	Tyre wear - Motorcycles - rural	F4
3860	Tyre wear - Mopeds	F4
3861	Tyre wear - Mopeds - highway	F4
3862	Tyre wear - Mopeds - urban	F4
3863	Tyre wear - Mopeds - rural	F4
3900	Gasoline evaporation and road wear	F4
3910	Gasoline evaporation and road wear - Passenger cars	F4
3911	Gasoline evaporation and road wear - Passenger cars - highway	F4
3912	Gasoline evaporation and road wear - Passenger cars - urban	F4
3913	Gasoline evaporation and road wear - Passenger cars - rural	F4
3920	Gasoline evaporation and road wear - LDV	F4
3921	Gasoline evaporation and road wear - LDV - highway	F4
3922	Gasoline evaporation and road wear - LDV - urban	F4
3923	Gasoline evaporation and road wear - LDV - rural	F4
3930	Gasoline evaporation and road wear - Trucks (>3.5t)	F4
3931	Gasoline evaporation and road wear - Trucks (>3.5t) - highway	F4
3932	Gasoline evaporation and road wear - Trucks (>3.5t) - urban	F4
3933	Gasoline evaporation and road wear - Trucks (>3.5t) - rural	F4
3940	Gasoline evaporation and road wear - Buses	F4
3941	Gasoline evaporation and road wear - Buses - highway	F4
3942	Gasoline evaporation and road wear - Buses - urban	F4
3943	Gasoline evaporation and road wear - Buses - rural	F4
3950	Gasoline evaporation and road wear - Motorcycles	F4
3951	Gasoline evaporation and road wear - Motorcycles - highway	F4
3952	Gasoline evaporation and road wear - Motorcycles - urban	F4
3953	Gasoline evaporation and road wear - Motorcycles - rural	F4
3960	Gasoline evaporation and road wear - Mopeds	F4
3961	Gasoline evaporation and road wear - Mopeds - highway	F4
3962	Gasoline evaporation and road wear - Mopeds - urban	F4
3963	Gasoline evaporation and road wear - Mopeds - rural	F4
4000	NON-ROAD TRANSPORT
4100	Civil aviation - LTO	H
4200	Railways	I
4300	Domestic navigation	G
4310	Domestic navigation, inland shipping	G
4320	Domestic navigation, coastal shipping	G
4330	Small combustion - Agriculture/Forestry/Fishing - National fishing	G
4400	Small combustion - Agriculture/Forestry/Fishing - Off-road vehicles and other machinery	I
4500	Manufacturing industry - Off-road vehicles and other machinery	I
4600	Other mobile combustion	I
4610	Other transportation, including pipeline compressors	I
4620	Small combustion - Commercial/institutional - Mobile	I
4630	Small combustion - Residential - Household and gardening	I
4640	Other mobile combustion	I
4700	International shipping	G
4710	International shipping, at sea	G
4720	International shipping, in ports	G
5000	SMALL COMBUSTION
5100	Commercial/institutional	C
5200	Residential	C
5300	Agriculture/Forestry/Fishing	C
5400	Other stationary combustion	C
6000	AGRICULTURE
6100	Enteric fermentation	K
6110	Enteric fermentation - Cattle	K
6120	Enteric fermentation - Sheep	K
6130	Enteric fermentation - Swine	K
6140	Enteric fermentation - Other animals	K
6200	Manure management	K
6210	Manure management - Cattle	K
6211	Manure management - Cattle - dairy	K
6212	Manure management - Cattle - non-dairy	K
6220	Manure management - Sheep	K
6230	Manure management - Swine	K
6240	Manure management - other animals	K
6241	Manure management - Buffalo	K
6242	Manure management - Goats	K
6243	Manure management - Horses	K
6244	Manure management - Mules and asses	K
6245	Manure management - Poultry	K
6246	Manure management - Other animals	K
6300	Application of manure and fertilizer	L
6310	Inorganic N-fertilizers (includes also urea application)	L
6320	Animal manure applied to soils	L
6330	Sewage sludge applied to soils	L
6340	Other organic fertilisers applied to soils (including compost)	L
6350	Urine and dung deposited by grazing animals	L
6360	Crop residues applied to soils	L
6400	Other agricultural soils	L
6410	Indirect emissions from managed soils	L
6420	Farm-level agricultural operations including storage, handling and transport of agricultural products	L
6430	Off-farm storage, handling and transport of bulk agricultural products	L
6440	Cultivated crops	L
6450	Use of pesticides	L
6500	Other agriculture	L
6510	Rice cultivation	L
6520	Field burning of agricultural residues	L
6530	Liming	L
6540	Urea application	L
6550	Other carbon-containing fertilizers	L
6560	Other	L
7000	WASTE
7100	Landfills	J
7110	Managed waste disposal sites	J
7120	Unmanaged waste disposal sites	J
7130	Uncategorized waste disposal sites	J
7200	Composting and anaerobic digestion	J
7210	Composting	J
7220	Anaerobic digestion at biogas facilities	J
7300	Waste incineration	J
7310	Municipal waste incineration	J
7320	Industrial waste incineration	J
7330	Hazardous waste incineration	J
7340	Clinical waste incineration	J
7350	Sewage sludge incineration	J
7360	Cremation	J
7370	Other waste incineration (please specify in the IIR)	J
7400	Open burning of waste	J
7500	Waste water treatment	J
7510	Domestic wastewater	J
7520	Industrial wastewater	J
7530	Other wastewater	J
7600	Other waste	J
7610	Other waste - bbq and tobacco	J
7620	Other waste - other	J
*F1-3: road transport exhaust emissions are split between gasoline (F1), diesel (F2) and other fuels (LPG, natural gas) (F3)

## Sheet: TableS2
NFR Code	NFR Name	SectorID	Notes
1A1a	Public electricity and heat production	1100
1A1b	Petroleum refining	1210
1A1c	Manufacture of solid fuels and other energy industries	1300
1A2a	Stationary combustion in manufacturing industries and construction: Iron and steel	2110
1A2b	Stationary combustion in manufacturing industries and construction: Non-ferrous metals	2210
1A2c	Stationary combustion in manufacturing industries and construction: Chemicals	2310
1A2d	Stationary combustion in manufacturing industries and construction: Pulp, Paper	2410
1A2e	Stationary combustion in manufacturing industries and construction: Food	2510
1A2f	Stationary combustion in manufacturing industries and construction: Non-metallic	2610
1A2gvii	Mobile Combustion in manufacturing industries and construction: (please specify in the IIR)	4500
1A2gviii	Stationary combustion in manufacturing industries and construction: Other	2810
1A3	Transport (fuel used)		Not part of national total (memo item in reporting)
1A3ai(i)	International aviation LTO (civil)	4100
1A3ai(ii)	International aviation cruise (civil)		Not part of national total (memo item in reporting)
1A3aii(i)	Domestic aviation LTO (civil)	4100
1A3aii(ii)	Domestic aviation cruise (civil)		Not part of national total (memo item in reporting)
1A3bi	Road transport: Passenger cars	3100
1A3bii	Road transport: Light duty vehicles	3200
1A3biii	Road transport: Heavy duty vehicles and buses	3300
1A3biv	Road transport: Mopeds & motorcycles	3500
1A3bv	Road transport: Gasoline evaporation	3900
1A3bvi	Road transport: Automobile tyre and brake wear	3700
1A3bvii	Road transport: Automobile road abrasion	3900
1A3c	Railways	4200
1A3di(i)	International maritime navigation		Not part of national total (memo item in reporting)
1A3di(ii)	International inland waterways	4310
1A3dii	National navigation (shipping)	4320
1A3ei	Pipeline transport	4610
1A3eii	Other (please specify in the IIR)	4640
1A4ai	Commercial/institutional: Stationary	5100
1A4aii	Commercial/institutional: Mobile	4620
1A4bi	Residential: Stationary	5200
1A4bii	Residential: Household and gardening (mobile)	4630
1A4ci	Agriculture/Forestry/Fishing: Stationary	5300
1A4cii	Agriculture/Forestry/Fishing: Off-road vehicles and other machinery	4400
1A4ciii	Agriculture/Forestry/Fishing: National fishing	4330
1A5a	Other stationary (including military)	5400
1A5b	Other, Mobile (including military, land based and recreational boats)	4640
1A5c	Multilateral operations	4640
1B1a	Fugitive emission from solid fuels: Coal mining and handling	1410
1B1b	Fugitive emission from solid fuels: Solid fuel transformation	1420
1B1c	Other fugitive emissions from solid fuels	1430
1B2ai	Fugitive emissions oil: Exploration, production, transport	1510
1B2aiv	Fugitive emissions oil: Refining / storage	1220
1B2av	Distribution of oil products	1520
1B2b	Fugitive emissions from natural gas (exploration, production, processing, transmission, storage, distribution and other)	1600
1B2c	Venting and flaring (oil, gas, combined oil and gas)	1700
1B2d	Other fugitive emissions from energy production	1810
2A1	Cement production	2620
2A2	Lime production	2631
2A3	Glass production	2632
2A5a	Quarrying and mining of minerals other than coal	2634
2A5b	Construction and demolition	2635
2A5c	Storage, handling and transport of mineral products	2636
2A6	Other mineral products (please specify in the IIR)	2637
2B1	Ammonia production	2321
2B10a	Chemical industry: Other (please specify in the IIR)	2328
2B10b	Storage, handling and transport of chemical products (please specify in the IIR)	2327
2B2	Nitric acid production	2322
2B3	Adipic acid production	2323
2B5	Carbide production	2324
2B6	Titanium dioxide production	2325
2B7	Soda ash production	2326
2C1	Iron and steel production	2120
2C2	Ferroalloys production	2129
2C3	Aluminium production	2220
2C4	Magnesium production	2231
2C5	Lead production	2232
2C6	Zinc production	2233
2C7a	Copper production	2235
2C7b	Nickel production	2235
2C7c	Other metal production (please specify in the IIR)	2235
2C7d	Storage, handling and transport of metal products	2234
2D3a	Domestic solvent use including fungicides	2711
2D3b	Road paving with asphalt	2722
2D3c	Asphalt roofing	2723
2D3d	Coating applications	2712
2D3e	Degreasing	2713
2D3f	Dry cleaning	2714
2D3g	Chemical products	2715
2D3h	Printing	2716
2D3i	Other solvent use (please specify in the IIR)	2717
2G	Other product use (please specify in the IIR)	2724
2H1	Pulp and paper industry	2420
2H2	Food and beverages industry	2520
2H3	Other industrial processes (please specify in the IIR)	2820
2I	Wood processing	2820
2K	Consumption of POPs and heavy metals (e.g. electrical and scientific equipment)	2724
2L	Other production, consumption, storage, transportation or handling of bulk products (please specify in the IIR)	2820
3B1a	Manure management - Dairy cattle	6211
3B1b	Manure management - Non-dairy cattle	6212
3B2	Manure management - Sheep	6220
3B3	Manure management - Swine	6230
3B4a	Manure management - Buffalo	6241
3B4d	Manure management - Goats	6242
3B4e	Manure management - Horses	6243
3B4f	Manure management - Mules and asses	6244
3B4gi	Manure mangement - Laying hens	6245
3B4gii	Manure mangement - Broilers	6245
3B4giii	Manure mangement - Turkeys	6245
3B4giv	Manure management - Other poultry	6245
3B4h	Manure management - Other animals (please specify in IIR)	6246
3Da1	Inorganic N-fertilizers (includes also urea application)	6310
3Da2a	Animal manure applied to soils	6320
3Da2b	Sewage sludge applied to soils	6330
3Da2c	Other organic fertilisers applied to soils (including compost)	6340
3Da3	Urine and dung deposited by grazing animals	6350
3Da4	Crop residues applied to soils	6360
3Db	Indirect emissions from managed soils	6410
3Dc	Farm-level agricultural operations including storage, handling and transport of agricultural products	6420
3Dd	Off-farm storage, handling and transport of bulk agricultural products	6430
3De	Cultivated crops	6440
3Df	Use of pesticides	6450
3F	Field burning of agricultural residues	6520
3I	Agriculture other (please specify in the IIR)	6560
5A	Biological treatment of waste - Solid waste disposal on land	7100
5B1	Biological treatment of waste - Composting	7210
5B2	Biological treatment of waste - Anaerobic digestion at biogas facilities	7220
5C1a	Municipal waste incineration	7310
5C1bi	Industrial waste incineration	7320
5C1bii	Hazardous waste incineration	7330
5C1biii	Clinical waste incineration	7340
5C1biv	Sewage sludge incineration	7350
5C1bv	Cremation	7360
5C1bvi	Other waste incineration (please specify in the IIR)	7370
5C2	Open burning of waste	7400
5D1	Domestic wastewater handling	7510
5D2	Industrial wastewater handling	7520
5D3	Other wastewater handling	7530
5E	Other waste (please specify in IIR)	7620
6A	Other (included in national total for entire territory) (please specify in IIR)	2724	Included as "Other product use"
6B	Other not included in national total of the entire territory (please specify in the IIR)		Not part of national total (memo item in reporting)
11A	Volcanoes		Not part of national total (memo item in reporting)
11B	Forest fires		Not part of national total (memo item in reporting)
11C	Other natural emissions (please specify in the IIR)		Not part of national total (memo item in reporting)

## Sheet: TableS3
SectorID	SectorName	FuelName	SectorID	FuelID
1.A.1.a	Public electricity and heat production	Biomass	1100	400
1.A.1.a	Public electricity and heat production	Gaseous fuels	1100	300
1.A.1.a	Public electricity and heat production	Liquid fuels	1100	200
1.A.1.a	Public electricity and heat production	Other fossil fuels	1100	500
1.A.1.a	Public electricity and heat production	Peat	1100	140
1.A.1.a	Public electricity and heat production	Solid fuels	1100	100
1.A.1.b	Petroleum refining	Biomass	1210	400
1.A.1.b	Petroleum refining	Gaseous fuels	1210	300
1.A.1.b	Petroleum refining	Liquid fuels	1210	200
1.A.1.b	Petroleum refining	Other fossil fuels	1210	500
1.A.1.b	Petroleum refining	Peat	1210	140
1.A.1.b	Petroleum refining	Solid fuels	1210	100
1.A.1.c	Manufacture of solid fuels and other energy industries	Biomass	1300	400
1.A.1.c	Manufacture of solid fuels and other energy industries	Gaseous fuels	1300	300
1.A.1.c	Manufacture of solid fuels and other energy industries	Liquid fuels	1300	200
1.A.1.c	Manufacture of solid fuels and other energy industries	Other fossil fuels	1300	500
1.A.1.c	Manufacture of solid fuels and other energy industries	Peat	1300	140
1.A.1.c	Manufacture of solid fuels and other energy industries	Solid fuels	1300	100
1.A.1.c.i	Manufacture of solid fuels	Biomass	1340	400
1.A.1.c.i	Manufacture of solid fuels	Gaseous fuels	1340	300
1.A.1.c.i	Manufacture of solid fuels	Liquid fuels	1340	200
1.A.1.c.i	Manufacture of solid fuels	Other fossil fuels	1340	500
1.A.1.c.i	Manufacture of solid fuels	Peat	1340	140
1.A.1.c.i	Manufacture of solid fuels	Solid fuels	1340	100
1.A.1.c.ii	Oil and gas extraction	Biomass	1320	400
1.A.1.c.ii	Oil and gas extraction	Gaseous fuels	1320	300
1.A.1.c.ii	Oil and gas extraction	Liquid fuels	1320	200
1.A.1.c.ii	Oil and gas extraction	Other fossil fuels	1320	500
1.A.1.c.ii	Oil and gas extraction	Peat	1320	140
1.A.1.c.ii	Oil and gas extraction	Solid fuels	1320	100
1.A.1.c.iii	Other energy industries	Biomass	1310	400
1.A.1.c.iii	Other energy industries	Gaseous fuels	1310	300
1.A.1.c.iii	Other energy industries	Liquid fuels	1310	200
1.A.1.c.iii	Other energy industries	Other fossil fuels	1310	500
1.A.1.c.iii	Other energy industries	Peat	1310	140
1.A.1.c.iii	Other energy industries	Solid fuels	1310	100
1.A.2.a	Iron and steel	Biomass	2110	400
1.A.2.a	Iron and steel	Gaseous fuels	2110	300
1.A.2.a	Iron and steel	Liquid fuels	2110	200
1.A.2.a	Iron and steel	Other fossil fuels	2110	500
1.A.2.a	Iron and steel	Peat	2110	140
1.A.2.a	Iron and steel	Solid fuels	2110	100
1.A.2.b	Non-ferrous metals	Biomass	2210	400
1.A.2.b	Non-ferrous metals	Gaseous fuels	2210	300
1.A.2.b	Non-ferrous metals	Liquid fuels	2210	200
1.A.2.b	Non-ferrous metals	Other fossil fuels	2210	500
1.A.2.b	Non-ferrous metals	Peat	2210	140
1.A.2.b	Non-ferrous metals	Solid fuels	2210	100
1.A.2.c	Chemicals	Biomass	2310	400
1.A.2.c	Chemicals	Gaseous fuels	2310	300
1.A.2.c	Chemicals	Liquid fuels	2310	200
1.A.2.c	Chemicals	Other fossil fuels	2310	500
1.A.2.c	Chemicals	Peat	2310	140
1.A.2.c	Chemicals	Solid fuels	2310	100
1.A.2.d	Pulp paper and print	Biomass	2410	400
1.A.2.d	Pulp paper and print	Gaseous fuels	2410	300
1.A.2.d	Pulp paper and print	Liquid fuels	2410	200
1.A.2.d	Pulp paper and print	Other fossil fuels	2410	500
1.A.2.d	Pulp paper and print	Peat	2410	140
1.A.2.d	Pulp paper and print	Solid fuels	2410	100
1.A.2.e	Food processing beverages and tobacco	Biomass	2510	400
1.A.2.e	Food processing beverages and tobacco	Gaseous fuels	2510	300
1.A.2.e	Food processing beverages and tobacco	Liquid fuels	2510	200
1.A.2.e	Food processing beverages and tobacco	Other fossil fuels	2510	500
1.A.2.e	Food processing beverages and tobacco	Peat	2510	140
1.A.2.e	Food processing beverages and tobacco	Solid fuels	2510	100
1.A.2.f	Non-metallic minerals	Biomass	2610	400
1.A.2.f	Non-metallic minerals	Gaseous fuels	2610	300
1.A.2.f	Non-metallic minerals	Liquid fuels	2610	200
1.A.2.f	Non-metallic minerals	Other fossil fuels	2610	500
1.A.2.f	Non-metallic minerals	Peat	2610	140
1.A.2.f	Non-metallic minerals	Solid fuels	2610	100
1.A.2.g.i	Manufacturing of machinery	Biomass	2810	400
1.A.2.g.i	Manufacturing of machinery	Gaseous fuels	2810	300
1.A.2.g.i	Manufacturing of machinery	Liquid fuels	2810	200
1.A.2.g.i	Manufacturing of machinery	Other fossil fuels	2810	500
1.A.2.g.i	Manufacturing of machinery	Peat	2810	140
1.A.2.g.i	Manufacturing of machinery	Solid fuels	2810	100
1.A.2.g.ii	Manufacturing of transport equipment	Biomass	2810	400
1.A.2.g.ii	Manufacturing of transport equipment	Gaseous fuels	2810	300
1.A.2.g.ii	Manufacturing of transport equipment	Liquid fuels	2810	200
1.A.2.g.ii	Manufacturing of transport equipment	Other fossil fuels	2810	500
1.A.2.g.ii	Manufacturing of transport equipment	Peat	2810	140
1.A.2.g.ii	Manufacturing of transport equipment	Solid fuels	2810	100
1.A.2.g.iii	Mining (excluding fuels) and quarrying	Biomass	2810	400
1.A.2.g.iii	Mining (excluding fuels) and quarrying	Gaseous fuels	2810	300
1.A.2.g.iii	Mining (excluding fuels) and quarrying	Liquid fuels	2810	200
1.A.2.g.iii	Mining (excluding fuels) and quarrying	Other fossil fuels	2810	500
1.A.2.g.iii	Mining (excluding fuels) and quarrying	Peat	2810	140
1.A.2.g.iii	Mining (excluding fuels) and quarrying	Solid fuels	2810	100
1.A.2.g.iv	Wood and wood products	Biomass	2810	400
1.A.2.g.iv	Wood and wood products	Gaseous fuels	2810	300
1.A.2.g.iv	Wood and wood products	Liquid fuels	2810	200
1.A.2.g.iv	Wood and wood products	Other fossil fuels	2810	500
1.A.2.g.iv	Wood and wood products	Peat	2810	140
1.A.2.g.iv	Wood and wood products	Solid fuels	2810	100
1.A.2.g.v	Construction	Biomass	2810	400
1.A.2.g.v	Construction	Gaseous fuels	2810	300
1.A.2.g.v	Construction	Liquid fuels	2810	200
1.A.2.g.v	Construction	Other fossil fuels	2810	500
1.A.2.g.v	Construction	Peat	2810	140
1.A.2.g.v	Construction	Solid fuels	2810	100
1.A.2.g.vi	Textile and leather	Biomass	2810	400
1.A.2.g.vi	Textile and leather	Gaseous fuels	2810	300
1.A.2.g.vi	Textile and leather	Liquid fuels	2810	200
1.A.2.g.vi	Textile and leather	Other fossil fuels	2810	500
1.A.2.g.vi	Textile and leather	Peat	2810	140
1.A.2.g.vi	Textile and leather	Solid fuels	2810	100
1.A.2.g.vii	Off-road vehicles and other machinery	Biomass	4500	400
1.A.2.g.vii	Off-road vehicles and other machinery	Gaseous fuels	4500	300
1.A.2.g.vii	Off-road vehicles and other machinery	Liquid fuels	4500	250
1.A.2.g.vii	Off-road vehicles and other machinery	Other fossil fuels	4500	500
1.A.2.g.vii	Off-road vehicles and other machinery	Solid fuels	4500	100
1.A.2.g.viii	Other (please specify)	Biomass	2810	400
1.A.2.g.viii	Other (please specify)	Gaseous fuels	2810	300
1.A.2.g.viii	Other (please specify)	Liquid fuels	2810	200
1.A.2.g.viii	Other (please specify)	Other fossil fuels	2810	500
1.A.2.g.viii	Other (please specify)	Peat	2810	140
1.A.2.g.viii	Other (please specify)	Solid fuels	2810	100
1.A.3.a	Domestic aviation	Aviation gasoline	4100	230
1.A.3.a	Domestic aviation	Biomass	4100	400
1.A.3.a	Domestic aviation	Jet kerosine	4100	240
1.A.3.b.i	Cars	Biodiesel (fossil component)	3100	250
1.A.3.b.i	Cars	Biomass	3100	400
1.A.3.b.i	Cars	Diesel oil	3100	250
1.A.3.b.i	Cars	Fossil part of biodiesel	3100	250
1.A.3.b.i	Cars	Gaseous fuels	3100	300
1.A.3.b.i	Cars	Gasoline	3100	230
1.A.3.b.i	Cars	Kerosene	3100	240
1.A.3.b.i	Cars	Liquefied petroleum gases (LPG)	3100	220
1.A.3.b.i	Cars	Lubricant oil	3100	275
1.A.3.b.i	Cars	Other	3100	500
1.A.3.b.i	Cars	Other fossil fuels	3100	500
1.A.3.b.i	Cars	Other liquid fuels	3100	230
1.A.3.b.ii	Light duty trucks	Biodiesel (fossil component)	3200	250
1.A.3.b.ii	Light duty trucks	Biomass	3200	400
1.A.3.b.ii	Light duty trucks	Diesel oil	3200	250
1.A.3.b.ii	Light duty trucks	Fossil part of biodiesel	3200	250
1.A.3.b.ii	Light duty trucks	Gaseous fuels	3200	300
1.A.3.b.ii	Light duty trucks	Gasoline	3200	230
1.A.3.b.ii	Light duty trucks	Kerosene	3200	240
1.A.3.b.ii	Light duty trucks	Liquefied petroleum gases (LPG)	3200	220
1.A.3.b.ii	Light duty trucks	Lubricant Oil	3200	275
1.A.3.b.ii	Light duty trucks	Lubricants	3200	275
1.A.3.b.ii	Light duty trucks	Other	3200	500
1.A.3.b.ii	Light duty trucks	Other fossil fuels	3200	500
1.A.3.b.ii	Light duty trucks	Other liquid fuels	3200	250
1.A.3.b.iii	Heavy duty trucks and buses	Biodiesel (fossil component)	3300	250
1.A.3.b.iii	Heavy duty trucks and buses	Biomass	3300	400
1.A.3.b.iii	Heavy duty trucks and buses	Diesel oil	3300	250
1.A.3.b.iii	Heavy duty trucks and buses	Fossil part of biodiesel	3300	250
1.A.3.b.iii	Heavy duty trucks and buses	Gaseous fuels	3300	300
1.A.3.b.iii	Heavy duty trucks and buses	Gasoline	3300	230
1.A.3.b.iii	Heavy duty trucks and buses	Kerosene	3300	240
1.A.3.b.iii	Heavy duty trucks and buses	Liquefied petroleum gases (LPG)	3300	220
1.A.3.b.iii	Heavy duty trucks and buses	Lubricant Oil	3300	275
1.A.3.b.iii	Heavy duty trucks and buses	Lubricants	3300	275
1.A.3.b.iii	Heavy duty trucks and buses	Other	3300	500
1.A.3.b.iii	Heavy duty trucks and buses	Other fossil fuels	3300	500
1.A.3.b.iii	Heavy duty trucks and buses	Other liquid fuels	3300	250
1.A.3.b.iv	Motorcycles	Biomass	3500	400
1.A.3.b.iv	Motorcycles	Diesel oil	3500	250
1.A.3.b.iv	Motorcycles	Gaseous fuels	3500	300
1.A.3.b.iv	Motorcycles	Gasoline	3500	230
1.A.3.b.iv	Motorcycles	Kerosene	3500	240
1.A.3.b.iv	Motorcycles	Liquefied petroleum gases (LPG)	3500	220
1.A.3.b.iv	Motorcycles	Lubricant Oil	3500	275
1.A.3.b.iv	Motorcycles	Lubricants	3500	275
1.A.3.b.iv	Motorcycles	Lubricants (two-stroke engines)	3500	275
1.A.3.b.iv	Motorcycles	Other	3500	500
1.A.3.b.iv	Motorcycles	Other fossil fuels	3500	500
1.A.3.b.iv	Motorcycles	Other liquid fuels	3500	230
1.A.3.b.v	Other (please specify)	Biomass	3100	400
1.A.3.b.v	Other (please specify)	Gaseous fuels	3100	300
1.A.3.b.v	Other (please specify)	Heating and other gasoil	3100	250
1.A.3.b.v	Other (please specify)	Other Kerosene	3100	240
1.A.3.b.v	Other (please specify)	Other liquid fuels	3100	230
1.A.3.b.v.CO2 from lubricant co-incineration in 2-stroke road vehicles	CO2 from lubricant co-incineration in 2-stroke road vehicles	lubricant used in 2-stroke mix	3100	275
1.A.3.c	Railways	Biodiesel (fossil component)	4200	250
1.A.3.c	Railways	Biomass	4200	400
1.A.3.c	Railways	Fossil part of biodiesel	4200	250
1.A.3.c	Railways	Gaseous fuels	4200	300
1.A.3.c	Railways	Liquid fuels	4200	250
1.A.3.c	Railways	Other fossil fuels	4200	500
1.A.3.c	Railways	Solid fuels	4200	100
1.A.3.d	Domestic navigation	Biodiesel (fossil component)	4310	250
1.A.3.d	Domestic navigation	Biomass	4310	400
1.A.3.d	Domestic navigation	Coal	4310	100
1.A.3.d	Domestic navigation	Diesel oil	4310	250
1.A.3.d	Domestic navigation	fossil part of biodiesel	4310	250
1.A.3.d	Domestic navigation	Gas/diesel oil	4310	250
1.A.3.d	Domestic navigation	Gaseous fuels	4310	300
1.A.3.d	Domestic navigation	Gasoline	4310	230
1.A.3.d	Domestic navigation	Liquified natural gas	4310	300
1.A.3.d	Domestic navigation	Lubricants	4310	275
1.A.3.d	Domestic navigation	Other fossil fuels	4310	500
1.A.3.d	Domestic navigation	Other liquid fuels	4310	250
1.A.3.d	Domestic navigation	Residual fuel oil	4310	260
1.A.3.e	Other transportation	Biomass	4640	400
1.A.3.e	Other transportation	Gaseous fuels	4640	300
1.A.3.e	Other transportation	Liquid fuels	4640	250
1.A.3.e	Other transportation	Other fossil fuels	4640	500
1.A.3.e	Other transportation	Solid fuels	4640	100
1.A.3.e.i	Pipeline transport	Biomass	4610	400
1.A.3.e.i	Pipeline transport	Gaseous fuels	4610	300
1.A.3.e.i	Pipeline transport	Liquid fuels	4610	250
1.A.3.e.i	Pipeline transport	Other fossil fuels	4610	500
1.A.3.e.i	Pipeline transport	Solid fuels	4610	100
1.A.3.e.ii.Aircraft support vehicles	Aircraft support vehicles	Liquid fuels	4640	230
1.A.3.e.ii.Off-road transport	Off-road transport	Biomass	4640	400
1.A.3.e.ii.Off-road transport	Off-road transport	Gaseous fuels	4640	300
1.A.3.e.ii.Off-road transport	Off-road transport	Liquid fuels	4640	250
1.A.3.e.ii.Off-road transport	Off-road transport	Other fossil fuels	4640	500
1.A.3.e.ii.Off-road transport	Off-road transport	Solid fuels	4640	100
1.A.3.e.ii.Off-road vehicles and other machinery	Off-road vehicles and other machinery	Biomass	4640	400
1.A.3.e.ii.Off-road vehicles and other machinery	Off-road vehicles and other machinery	Gaseous fuels	4640	300
1.A.3.e.ii.Off-road vehicles and other machinery	Off-road vehicles and other machinery	Liquid fuels	4640	250
1.A.3.e.ii.Off-road vehicles and other machinery	Off-road vehicles and other machinery	Other fossil fuels	4640	500
1.A.3.e.ii.Off-road vehicles and other machinery	Off-road vehicles and other machinery	Solid fuels	4640	100
1.A.3.e.ii.Other non-specified	Other non-specified	Biomass	4640	400
1.A.3.e.ii.Other non-specified	Other non-specified	Gaseous fuels	4640	300
1.A.3.e.ii.Other non-specified	Other non-specified	Liquid fuels	4640	250
1.A.3.e.ii.Other non-specified	Other non-specified	Other fossil fuels	4640	500
1.A.3.e.ii.Other non-specified	Other non-specified	Solid fuels	4640	100
1.A.4.a.i	Stationary combustion	Biomass	5100	400
1.A.4.a.i	Stationary combustion	Gaseous fuels	5100	300
1.A.4.a.i	Stationary combustion	Liquid fuels	5100	200
1.A.4.a.i	Stationary combustion	Other fossil fuels	5100	500
1.A.4.a.i	Stationary combustion	Peat	5100	140
1.A.4.a.i	Stationary combustion	Solid fuels	5100	100
1.A.4.a.ii	Off-road vehicles and other machinery	Biomass	4620	400
1.A.4.a.ii	Off-road vehicles and other machinery	Gaseous fuels	4620	300
1.A.4.a.ii	Off-road vehicles and other machinery	Liquid fuels	4620	250
1.A.4.a.ii	Off-road vehicles and other machinery	Other fossil fuels	4620	500
1.A.4.a.ii	Off-road vehicles and other machinery	Solid fuels	4620	100
1.A.4.b.i	Stationary combustion	Biomass	5200	400
1.A.4.b.i	Stationary combustion	Gaseous fuels	5200	300
1.A.4.b.i	Stationary combustion	Liquid fuels	5200	200
1.A.4.b.i	Stationary combustion	Other fossil fuels	5200	500
1.A.4.b.i	Stationary combustion	Peat	5200	140
1.A.4.b.i	Stationary combustion	Solid fuels	5200	100
1.A.4.b.ii	Off-road vehicles and other machinery	Biomass	4630	400
1.A.4.b.ii	Off-road vehicles and other machinery	Gaseous fuels	4630	300
1.A.4.b.ii	Off-road vehicles and other machinery	Liquid fuels	4630	230
1.A.4.b.ii	Off-road vehicles and other machinery	Other fossil fuels	4630	500
1.A.4.b.ii	Off-road vehicles and other machinery	Solid fuels	4630	100
1.A.4.b.iii.Residential	Residential	Biomass	5200	400
1.A.4.b.iii.Residential	Residential	Gaseous fuels	5200	300
1.A.4.b.iii.Residential	Residential	Liquid fuels	5200	200
1.A.4.b.iii.Residential	Residential	Other fossil fuels	5200	500
1.A.4.b.iii.Residential	Residential	Peat	5200	140
1.A.4.b.iii.Residential	Residential	Solid fuels	5200	100
1.A.4.c.i	Stationary	Biomass	5300	400
1.A.4.c.i	Stationary	Gaseous fuels	5300	300
1.A.4.c.i	Stationary	Liquid fuels	5300	200
1.A.4.c.i	Stationary	Other fossil fuels	5300	500
1.A.4.c.i	Stationary	Peat	5300	140
1.A.4.c.i	Stationary	Solid fuels	5300	100
1.A.4.c.ii	Off-road vehicles and other machinery	Biodiesel (fossil component)	4400	250
1.A.4.c.ii	Off-road vehicles and other machinery	Biomass	4400	400
1.A.4.c.ii	Off-road vehicles and other machinery	Diesel oil	4400	250
1.A.4.c.ii	Off-road vehicles and other machinery	fossil part of biodiesel	4400	250
1.A.4.c.ii	Off-road vehicles and other machinery	Gaseous fuels	4400	300
1.A.4.c.ii	Off-road vehicles and other machinery	Gasoil	4400	250
1.A.4.c.ii	Off-road vehicles and other machinery	Gasoline	4400	230
1.A.4.c.ii	Off-road vehicles and other machinery	Heavy fuel oil	4400	260
1.A.4.c.ii	Off-road vehicles and other machinery	Liquefied petroleum gases (LPG)	4400	220
1.A.4.c.ii	Off-road vehicles and other machinery	Marine gasoil	4400	250
1.A.4.c.ii	Off-road vehicles and other machinery	Other fossil fuels	4400	500
1.A.4.c.ii	Off-road vehicles and other machinery	Other Kerosene	4400	240
1.A.4.c.ii	Off-road vehicles and other machinery	Other liquid fuels	4400	250
1.A.4.c.ii.fossil part of biodiesel	fossil part of biodiesel	NA	0	0
1.A.4.c.iii	Fishing	Biomass	4330	400
1.A.4.c.iii	Fishing	Gas/diesel oil	4330	250
1.A.4.c.iii	Fishing	Gaseous fuels	4330	300
1.A.4.c.iii	Fishing	Gasoline	4330	230
1.A.4.c.iii	Fishing	Other fossil fuels	4330	500
1.A.4.c.iii	Fishing	Other liquid fuels	4330	250
1.A.4.c.iii	Fishing	Residual fuel oil	4330	260
1.A.5	Other (as specified in table 1.A(a) sheet 4)	Liquid fuels	0	0
1.A.5.a	Stationary	Biomass	5400	400
1.A.5.a	Stationary	Gaseous fuels	5400	300
1.A.5.a	Stationary	Liquid fuels	5400	200
1.A.5.a	Stationary	Other fossil fuels	5400	500
1.A.5.a	Stationary	Peat	5400	140
1.A.5.a	Stationary	Solid fuels	5400	100
1.A.5.b	Mobile	Aviation gasoline	4640	230
1.A.5.b	Mobile	Biomass	4640	400
1.A.5.b	Mobile	Diesel oil	4640	250
1.A.5.b	Mobile	Gaseous fuels	4640	300
1.A.5.b	Mobile	Gasoline	4640	230
1.A.5.b	Mobile	Jet kerosine	4640	240
1.A.5.b	Mobile	Liquid fuels	4640	250
1.A.5.b	Mobile	Other fossil fuels	4640	500
1.A.5.b	Mobile	Solid fuels	4640	100
1.B.1.a	Coal mining and handling	NA	1410	0
1.B.1.b	Solid fuel transformation	NA	1420	0
1.B.1.c	Other (as specified in table 1.B.1)	NA	1430	0
1.B.2.a	Oil	NA	1510	0
1.B.2.b	Natural gas	NA	1600	0
1.B.2.c	Venting and flaring	NA	1700	0
1.B.2.d	Other (as specified in table 1.B.2)	NA	1810	0
1.C.1	Transport of CO2	NA	1820	0
1.C.2	Injection and storage	NA	1830	0
2.A.1	Cement production	NA	2620	0
2.A.2	Lime production	NA	2631	0
2.A.3	Glass production	NA	2632	0
2.A.4	Other process uses of carbonates	NA	2633	0
2.B.1	Ammonia production	NA	2321	0
2.B.10	10. Other (as specified in table 2(I).A-H)	NA	2328	0
2.B.2	Nitric acid production	NA	2322	0
2.B.3	Adipic acid production	NA	2323	0
2.B.4	Caprolactam glyoxal and glyoxylic acid production	NA	2328	0
2.B.5	Carbide production	NA	2324	0
2.B.6	Titanium dioxide production	NA	2325	0
2.B.7	Soda ash production	NA	2326	0
2.B.8	Petrochemical and carbon black production	NA	2328	0
2.C.1	Iron and steel production	NA	2120	0
2.C.2	Ferroalloys production	NA	2129	0
2.C.3	Aluminium production	NA	2220	0
2.C.4	Magnesium production	NA	2231	0
2.C.5	Lead production	NA	2232	0
2.C.6	Zinc production	NA	2233	0
2.C.7	Other (as specified in table 2(I).A-H)	NA	2235	0
2.D.1	Lubricant use	NA	2724	0
2.D.2	Paraffin wax use	NA	2721	0
2.D.3	Other	NA	2724	0
2.G.3	N2O from product uses	NA	2724	0
2.G.4	Other	NA	2724	0
2.H	Other (as specified in tables 2(I).A-H and 2(II))(3)	NA	2820	0
2.H.1	Pulp and paper	NA	2420	0
2.H.2	Food and beverages industry	NA	2520	0
2.H.3.Batteries Manufacturing	Batteries Manufacturing	NA	2820	0
2.H.3.Blasting and shooting	Blasting and shooting	NA	2820	0
2.H.3.Consumption of carbonates in flue gas desulphurisation	Consumption of carbonates in flue gas desulphurisation	NA	2820	0
2.H.3.Copper production (SO2 emissions)	Copper production (SO2 emissions)	NA	2235	0
2.H.3.Fireworks	Fireworks	NA	2724	0
2.H.3.Flaring in iron and steel production (N2O emissions)	Flaring in iron and steel production (N2O emissions)	NA	2120	0
2.H.3.Glass (NMVOC emissions)	Glass (NMVOC emissions)	NA	2632	0
2.H.3.Grouped confidential data of halocarbons and SF6	Grouped confidential data of halocarbons and SF6	NA	2820	0
2.H.3.Mineral industry CH4 emissions (fletton bricks)	Mineral industry CH4 emissions (fletton bricks)	NA	2820	0
2.H.3.Mineral wool production	Mineral wool production	NA	2820	0
2.H.3.Ore mines	Ore mines	NA	2820	0
2.H.3.Pulp and Paper Industry	Pulp and Paper Industry	NA	2420	0
2.H.3.Quarrying and mining of minerals other than coal	Quarrying and mining of minerals other than coal	NA	2820	0
2.H.3.Soda ash production (CO emissions)	Soda ash production (CO emissions)	NA	2820	0
2.H.3.Titanium dioxide production (NOx and SO2 emissions)	Titanium dioxide production (NOx and SO2 emissions)	NA	2325	0
2.H.3.Tobacco	Tobacco	NA	2724	0
2.H.3.Vegetable Oil Production	Vegetable Oil Production	NA	2820	0
2.H.3.Wood Processing	Wood Processing	NA	2820	0
3(I).A.1	Cattle(1)	NA	6110	0
3(I).A.2	Sheep	NA	6120	0
3(I).A.3	Swine	NA	6130	0
3(I).A.4	Other livestock	NA	6140	0
3(I).B.1	Cattle(1)	NA	6210	0
3(I).B.2	Sheep	NA	6220	0
3(I).B.3	Swine	NA	6230	0
3(I).B.4	Other livestock	NA	6240	0
3(I).B.5	Indirect N2O emissions	NA	6560	0
3.C	Rice cultivation	NA	6510	0
3.D.a.1	Inorganic N fertilizers(3)	NA	6310	0
3.D.a.2.a	Animal manure applied to soils	NA	6320	0
3.D.a.2.b	Sewage sludge applied to soils	NA	6330	0
3.D.a.2.c	Other organic fertilizers applied to soils	NA	6340	0
3.D.a.3	Urine and dung deposited by grazing animals	NA	6350	0
3.D.a.4	Crop residues	NA	6360	0
3.D.a.5	Mineralization/immobilization associated with loss/gain of soil organic matter (4)(5)	NA	6410	0
3.D.a.6	Cultivation of organic soils (i.e. histosols)(2)	NA	6410	0
3.D.a.7	Other	NA	6410	0
3.D.b.1	Atmospheric deposition(6)	NA	6410	0
3.D.b.2	Nitrogen leaching and run-off	NA	6410	0
3.E	Prescribed burning of savannas	NA	6520	0
3.F	Field burning of agricultural residues	NA	6520	0
3.G	Liming	NA	6530	0
3.H	Urea application	NA	6540	0
3.I	Other carbon-containing fertilizers	NA	6550	0
3.J	Other (please specify)	NA	6560	0
5.A.1	Managed waste disposal sites	NA	7110	0
5.A.2	Unmanaged waste disposal sites	NA	7120	0
5.A.3	Uncategorized waste disposal sites	NA	7130	0
5.B.1	Composting	NA	7210	0
5.B.2	Anaerobic digestion at biogas facilities	NA	7220	0
5.C.1	Waste incineration	NA	7310	0
5.C.2	Open burning of waste	NA	7400	0
5.D.1	Domestic wastewater	NA	7510	0
5.D.2	Industrial wastewater	NA	7520	0
5.D.3	Other (as specified in table 5.D)	NA	7530	0
5.E	Other (please specify)	NA	7620	0

## Sheet: Table S4
GAINS_Sector	GAINS_Activity	Pollutant	SectorID	FuelID
AGR_ARABLE	NOF	PM10	6420	0
AGR_ARABLE	NOF	PM2_5	6420	0
AGR_ARABLE	NOF	TSP	6420	0
AGR_ARABLE_SUB	N_INPUT	N2O	6420	0
AGR_ARABLE_SUBB	AREA	N2O	6420	0
AGR_ARABLE_SUBB	N_INPUT	N2O	6420	0
AGR_ARABLE_TEM	N_INPUT	N2O	6420	0
AGR_ARABLE_TEMP	AREA	N2O	6420	0
AGR_ARABLE_TEMP	N_INPUT	N2O	6420	0
AGR_BEEF	NOF	PM10	6212	0
AGR_BEEF	NOF	PM2_5	6212	0
AGR_BEEF	NOF	TSP	6212	0
AGR_BEEF	OL	CH4	6212	0
AGR_BEEF	OL	NH3	6212	0
AGR_BEEF	OL_F	CH4	6110	0
AGR_BEEF	OS	CH4	6212	0
AGR_BEEF	OS	NH3	6212	0
AGR_COWS	DL	CH4	6211	0
AGR_COWS	DL	NH3	6211	0
AGR_COWS	DL_F	CH4	6110	0
AGR_COWS	DS	CH4	6211	0
AGR_COWS	DS	NH3	6211	0
AGR_COWS	NOF	PM10	6211	0
AGR_COWS	NOF	PM2_5	6211	0
AGR_COWS	NOF	TSP	6211	0
AGR_OTANI	BS	CH4	6241	0
AGR_OTANI	BS	NH3	6241	0
AGR_OTANI	CM	CH4	6246	0
AGR_OTANI	CM	NH3	6246	0
AGR_OTANI	FU	NH3	6246	0
AGR_OTANI	HO	CH4	6243	0
AGR_OTANI	HO	NH3	6243	0
AGR_OTANI	NOF	PM10	6246	0
AGR_OTANI	NOF	PM2_5	6246	0
AGR_OTANI	NOF	TSP	6246	0
AGR_OTANI	SH	CH4	6220	0
AGR_OTANI	SH	NH3	6220	0
AGR_PIG	NOF	PM10	6230	0
AGR_PIG	NOF	PM2_5	6230	0
AGR_PIG	NOF	TSP	6230	0
AGR_PIG	PL	CH4	6230	0
AGR_PIG	PL	NH3	6230	0
AGR_PIG	PS	CH4	6230	0
AGR_PIG	PS	NH3	6230	0
AGR_POULT	LH	CH4	6245	0
AGR_POULT	LH	NH3	6245	0
AGR_POULT	NOF	PM10	6245	0
AGR_POULT	NOF	PM2_5	6245	0
AGR_POULT	NOF	TSP	6245	0
AGR_POULT	OP	CH4	6245	0
AGR_POULT	OP	NH3	6245	0
APPLIC_L	MANURE_N	N2O	6320	0
APPLIC_L	RICE_N	N2O	6510	0
APPLIC_L	SOIL_N	N2O	6310	0
APPLIC_M	MANURE_N	N2O	6320	0
APPLIC_M	RICE_N	N2O	6510	0
APPLIC_M	SOIL_N	N2O	6310	0
APPLIC_S	MANURE_N	N2O	6320	0
APPLIC_S	RICE_N	N2O	6510	0
APPLIC_S	SOIL_N	N2O	6310	0
AU_LGP	NOF	PM10	2230	0
AU_LGP	NOF	PM2_5	2230	0
AUTO_P	VEH	VOC	2712	0
AUTO_P_NEW	VEH	VOC	2712	0
COIL	SC	VOC	2712	0
CON_COMB	BC1	CH4	1300	130
CON_COMB	BC1	CO2	1300	130
CON_COMB	BC1	N2O	1300	130
CON_COMB	BC1	NH3	1300	130
CON_COMB	BC1	NOX	1300	130
CON_COMB	BC1	SO2	1300	130
CON_COMB	BC1	VOC	1300	130
CON_COMB	DC	CH4	1300	120
CON_COMB	DC	CO	1300	120
CON_COMB	DC	CO2	1300	120
CON_COMB	DC	N2O	1300	120
CON_COMB	DC	NH3	1300	120
CON_COMB	DC	NOX	1300	120
CON_COMB	DC	PM10	1300	120
CON_COMB	DC	PM2_5	1300	120
CON_COMB	DC	SO2	1300	120
CON_COMB	DC	TSP	1300	120
CON_COMB	DC	VOC	1300	120
CON_COMB	GAS	CH4	1300	300
CON_COMB	GAS	CO	1300	300
CON_COMB	GAS	CO2	1300	300
CON_COMB	GAS	N2O	1300	300
CON_COMB	GAS	NH3	1300	300
CON_COMB	GAS	NOX	1300	300
CON_COMB	GAS	PM10	1300	300
CON_COMB	GAS	PM2_5	1300	300
CON_COMB	GAS	SO2	1300	300
CON_COMB	GAS	TSP	1300	300
CON_COMB	GAS	VOC	1300	300
CON_COMB	GSL	CH4	1300	230
CON_COMB	GSL	CO	1300	230
CON_COMB	GSL	CO2	1300	230
CON_COMB	GSL	N2O	1300	230
CON_COMB	GSL	NH3	1300	230
CON_COMB	GSL	NOX	1300	230
CON_COMB	GSL	PM10	1300	230
CON_COMB	GSL	PM2_5	1300	230
CON_COMB	GSL	SO2	1300	230
CON_COMB	GSL	TSP	1300	230
CON_COMB	GSL	VOC	1300	230
CON_COMB	HC1	CH4	1300	110
CON_COMB	HC1	CO2	1300	110
CON_COMB	HC1	N2O	1300	110
CON_COMB	HC1	NH3	1300	110
CON_COMB	HC1	NOX	1300	110
CON_COMB	HC1	SO2	1300	110
CON_COMB	HC1	VOC	1300	110
CON_COMB	HC2	CO2	1300	110
CON_COMB	HC2	N2O	1300	110
CON_COMB	HC2	NH3	1300	110
CON_COMB	HC2	NOX	1300	110
CON_COMB	HC2	SO2	1300	110
CON_COMB	HC2	VOC	1300	110
CON_COMB	HC3	CH4	1300	110
CON_COMB	HC3	CO2	1300	110
CON_COMB	HC3	N2O	1300	110
CON_COMB	HC3	NOx	1300	110
CON_COMB	HC3	SO2	1300	110
CON_COMB	HF	CH4	1300	260
CON_COMB	HF	CO	1300	260
CON_COMB	HF	CO2	1300	260
CON_COMB	HF	N2O	1300	260
CON_COMB	HF	NH3	1300	260
CON_COMB	HF	NOX	1300	260
CON_COMB	HF	PM10	1300	260
CON_COMB	HF	PM2_5	1300	260
CON_COMB	HF	SO2	1300	260
CON_COMB	HF	TSP	1300	260
CON_COMB	HF	VOC	1300	260
CON_COMB	LPG	CH4	1300	220
CON_COMB	LPG	CO	1300	220
CON_COMB	LPG	CO2	1300	220
CON_COMB	LPG	N2O	1300	220
CON_COMB	LPG	NH3	1300	220
CON_COMB	LPG	NOX	1300	220
CON_COMB	LPG	PM10	1300	220
CON_COMB	LPG	PM2_5	1300	220
CON_COMB	LPG	TSP	1300	220
CON_COMB	MD	CH4	1300	250
CON_COMB	MD	CO	1300	250
CON_COMB	MD	CO2	1300	250
CON_COMB	MD	N2O	1300	250
CON_COMB	MD	NH3	1300	250
CON_COMB	MD	NOX	1300	250
CON_COMB	MD	PM10	1300	250
CON_COMB	MD	PM2_5	1300	250
CON_COMB	MD	SO2	1300	250
CON_COMB	MD	TSP	1300	250
CON_COMB	MD	VOC	1300	250
CON_COMB	OS1	CH4	1300	400
CON_COMB	OS1	CO	1300	400
CON_COMB	OS1	CO2	1300	400
CON_COMB	OS1	CO2_BIO	1300	400
CON_COMB	OS1	N2O	1300	400
CON_COMB	OS1	NH3	1300	400
CON_COMB	OS1	NOX	1300	400
CON_COMB	OS1	PM10	1300	400
CON_COMB	OS1	PM2_5	1300	400
CON_COMB	OS1	SO2	1300	400
CON_COMB	OS1	TSP	1300	400
CON_COMB	OS1	VOC	1300	400
CON_COMB	OS2	CH4	1300	500
CON_COMB	OS2	CO	1300	500
CON_COMB	OS2	N2O	1300	500
CON_COMB	OS2	NH3	1300	500
CON_COMB	OS2	NOX	1300	500
CON_COMB	OS2	PM10	1300	500
CON_COMB	OS2	PM2_5	1300	500
CON_COMB	OS2	SO2	1300	500
CON_COMB	OS2	TSP	1300	500
CON_COMB	OS2	VOC	1300	500
CON_COMB	REN	NOX	1300	460
CON_COMB	REN	SO2	1300	460
CON_COMB	WSFNR	CO2	1300	500
CON_COMB1	BC1	CO	1300	130
CON_COMB1	BC1	PM10	1300	130
CON_COMB1	BC1	PM2_5	1300	130
CON_COMB1	BC1	TSP	1300	130
CON_COMB1	HC1	CO	1300	110
CON_COMB1	HC1	PM10	1300	110
CON_COMB1	HC1	PM2_5	1300	110
CON_COMB1	HC1	TSP	1300	130
CON_COMB1	HC2	CO	1300	110
CON_COMB1	HC2	PM10	1300	110
CON_COMB1	HC2	PM2_5	1300	110
CON_COMB1	HC3	CO	1300	110
CON_COMB2	BC1	CO	1300	130
CON_COMB2	BC1	N2O	1300	130
CON_COMB2	BC1	PM10	1300	130
CON_COMB2	BC1	PM2_5	1300	130
CON_COMB2	BC1	TSP	1300	130
CON_COMB2	HC1	CO	1300	110
CON_COMB2	HC1	N2O	1300	110
CON_COMB2	HC1	PM10	1300	110
CON_COMB2	HC1	PM2_5	1300	110
CON_COMB2	HC1	TSP	1300	110
CON_COMB2	HC2	CO	1300	110
CON_COMB2	HC2	N2O	1300	110
CON_COMB2	HC2	PM10	1300	110
CON_COMB2	HC2	PM2_5	1300	110
CON_COMB2	HC3	CO	1300	110
CON_COMB2	HC3	N2O	1300	110
CON_COMB3	BC1	CO	1300	130
CON_COMB3	BC1	PM10	1300	130
CON_COMB3	BC1	PM2_5	1300	130
CON_COMB3	BC1	TSP	1300	130
CON_COMB3	HC1	CO	1300	110
CON_COMB3	HC1	PM10	1300	110
CON_COMB3	HC1	PM2_5	1300	110
CON_COMB3	HC1	TSP	1300	110
CON_COMB3	HC2	CO	1300	110
CON_COMB3	HC2	PM10	1300	110
CON_COMB3	HC2	PM2_5	1300	110
CON_COMB3	HC3	CO	1300	110
CON_LOSS	BC1	CO2	1100	130
CON_LOSS	BC1	NOX	1100	130
CON_LOSS	BC1	SO2	1100	130
CON_LOSS	DC	CO2	1100	120
CON_LOSS	DC	NOX	1100	120
CON_LOSS	DC	SO2	1100	120
CON_LOSS	GAS	CH4	1630	0
CON_LOSS	GAS	CO2	1100	300
CON_LOSS	GAS	NOX	1100	300
CON_LOSS	GAS	SO2	1100	300
CON_LOSS	GSL	CO2	1100	230
CON_LOSS	GSL	NOX	1100	230
CON_LOSS	GSL	SO2	1100	230
CON_LOSS	HC1	CO2	1100	110
CON_LOSS	HC1	NOX	1100	110
CON_LOSS	HC1	SO2	1100	110
CON_LOSS	HC2	CO2	1100	110
CON_LOSS	HC2	NOX	1100	110
CON_LOSS	HC2	SO2	1100	110
CON_LOSS	HF	CO2	1100	260
CON_LOSS	HF	NOX	1100	260
CON_LOSS	HF	SO2	1100	260
CON_LOSS	LPG	CO2	1100	220
CON_LOSS	LPG	NOX	1100	220
CON_LOSS	MD	CO2	1100	250
CON_LOSS	MD	NOX	1100	250
CON_LOSS	MD	SO2	1100	250
CON_LOSS	OS1	CO2	1100	400
CON_LOSS	OS1	NOX	1100	400
CON_LOSS	OS1	SO2	1100	400
CONSTRUCT	NOF	PM10	2630	0
CONSTRUCT	NOF	PM2_5	2630	0
CONSTRUCT	NOF	TSP	2630	0
COWS_3000_MILK	DL	CH4	6211	0
COWS_3000_MILK	DL	NH3	6211	0
COWS_3000_MILK	DL_F	CH4	6110	0
COWS_3000_MILK	DS	CH4	6211	0
COWS_3000_MILK	DS	NH3	6211	0
D_GASST	GSL	VOC	1520	0
D_REFDEP	GSL	VOC	1520	0
D_REFDEP	MD	VOC	1520	0
D_REFDEP_S	GSL	VOC	1520	0
D_REFDEP_S	MD	VOC	1520	0
DECO_P	PNT	VOC	2712	0
DEGR	SLV	VOC	2713	0
DEGR_NEW	SLV	VOC	2713	0
DOM	BC1	CO2	5200	130
DOM	BC1	N2O	5200	130
DOM	BC1	NH3	5200	130
DOM	BC1	NOX	5200	130
DOM	BC1	SO2	5200	130
DOM	BC2	CO2	5200	130
DOM	BC2	N2O	5200	130
DOM	BC2	NH3	5200	130
DOM	BC2	NOX	5200	130
DOM	BC2	SO2	5200	130
DOM	BIOG	CH4	5200	300
DOM	BIOG	CO	5200	300
DOM	BIOG	PM10	5200	300
DOM	BIOG	PM2_5	5200	300
DOM	BIOG	TSP	5200	300
DOM	BIOG	VOC	5200	300
DOM	CHCOA	CH4	5200	100
DOM	CHCOA	CO	5200	100
DOM	CHCOA	PM10	5200	100
DOM	CHCOA	PM2_5	5200	100
DOM	CHCOA	TSP	5200	100
DOM	CHCOA	VOC	5200	100
DOM	DC	CO2	5200	120
DOM	DC	N2O	5200	120
DOM	DC	NH3	5200	120
DOM	DC	NOX	5200	120
DOM	DC	SO2	5200	120
DOM	GAS	CH4	5200	300
DOM	GAS	CO	5200	300
DOM	GAS	CO2	5200	300
DOM	GAS	N2O	5200	300
DOM	GAS	NH3	5200	300
DOM	GAS	NOX	5200	300
DOM	GAS	PM10	5200	300
DOM	GAS	PM2_5	5200	300
DOM	GAS	SO2	5200	300
DOM	GAS	TSP	5200	300
DOM	GAS	VOC	5200	300
DOM	GSL	CH4	5200	230
DOM	GSL	CO	5200	230
DOM	GSL	CO2	5200	230
DOM	GSL	N2O	5200	230
DOM	GSL	NH3	5200	230
DOM	GSL	NOX	5200	230
DOM	GSL	PM10	5200	230
DOM	GSL	PM2_5	5200	230
DOM	GSL	SO2	5200	230
DOM	GSL	TSP	5200	230
DOM	GSL	VOC	5200	230
DOM	HC1	CO2	5200	110
DOM	HC1	N2O	5200	110
DOM	HC1	NH3	5200	110
DOM	HC1	NOX	5200	110
DOM	HC1	SO2	5200	110
DOM	HC2	CO2	5200	110
DOM	HC2	N2O	5200	110
DOM	HC2	NH3	5200	110
DOM	HC2	NOX	5200	110
DOM	HC2	SO2	5200	110
DOM	HF	CH4	5200	260
DOM	HF	CO	5200	260
DOM	HF	CO2	5200	260
DOM	HF	N2O	5200	260
DOM	HF	NH3	5200	260
DOM	HF	NOX	5200	260
DOM	HF	PM10	5200	260
DOM	HF	PM2_5	5200	260
DOM	HF	SO2	5200	260
DOM	HF	TSP	5200	260
DOM	HF	VOC	5200	260
DOM	LPG	CH4	5200	220
DOM	LPG	CO	5200	220
DOM	LPG	CO2	5200	220
DOM	LPG	N2O	5200	220
DOM	LPG	NH3	5200	220
DOM	LPG	NOX	5200	220
DOM	LPG	PM10	5200	220
DOM	LPG	PM2_5	5200	220
DOM	LPG	TSP	5200	220
DOM	LPG	VOC	5200	220
DOM	MD	CH4	5200	250
DOM	MD	CO	5200	250
DOM	MD	CO2	5200	250
DOM	MD	N2O	5200	250
DOM	MD	NH3	5200	250
DOM	MD	NOX	5200	250
DOM	MD	PM10	5200	250
DOM	MD	PM2_5	5200	250
DOM	MD	SO2	5200	250
DOM	MD	TSP	5200	250
DOM	MD	VOC	5200	250
DOM	OS1	N2O	5200	400
DOM	OS1	NH3	5200	400
DOM	OS1	NOX	5200	400
DOM	OS1	SO2	5200	400
DOM	REN	NOX	5200	460
DOM	REN	SO2	5200	460
DOM_FPLACE	FWD	CH4	5200	410
DOM_FPLACE	FWD	CO	5200	410
DOM_FPLACE	FWD	NH3	5200	410
DOM_FPLACE	FWD	NOx	5200	410
DOM_FPLACE	FWD	PM10	5200	410
DOM_FPLACE	FWD	PM2_5	5200	410
DOM_FPLACE	FWD	SO2	5200	410
DOM_FPLACE	FWD	TSP	5200	410
DOM_FPLACE	FWD	VOC	5200	410
DOM_MB_A	BC1	CH4	5200	130
DOM_MB_A	BC1	CO	5200	130
DOM_MB_A	BC1	PM10	5200	130
DOM_MB_A	BC1	PM2_5	5200	130
DOM_MB_A	BC1	TSP	5200	130
DOM_MB_A	BC1	VOC	5200	130
DOM_MB_A	BC2	CH4	5200	130
DOM_MB_A	BC2	CO	5200	130
DOM_MB_A	BC2	PM10	5200	130
DOM_MB_A	BC2	PM2_5	5200	130
DOM_MB_A	BC2	VOC	5200	130
DOM_MB_A	DC	CH4	5200	120
DOM_MB_A	DC	CO	5200	120
DOM_MB_A	DC	PM10	5200	120
DOM_MB_A	DC	PM2_5	5200	120
DOM_MB_A	DC	TSP	5200	120
DOM_MB_A	DC	VOC	5200	120
DOM_MB_A	FWD	CH4	5200	410
DOM_MB_A	FWD	CO	5200	410
DOM_MB_A	FWD	NH3	5200	410
DOM_MB_A	FWD	NOx	5200	410
DOM_MB_A	FWD	PM10	5200	410
DOM_MB_A	FWD	PM2_5	5200	410
DOM_MB_A	FWD	SO2	5200	410
DOM_MB_A	FWD	TSP	5200	410
DOM_MB_A	FWD	VOC	5200	410
DOM_MB_A	HC1	CH4	5200	110
DOM_MB_A	HC1	CO	5200	110
DOM_MB_A	HC1	PM10	5200	110
DOM_MB_A	HC1	PM2_5	5200	110
DOM_MB_A	HC1	TSP	5200	110
DOM_MB_A	HC1	VOC	5200	110
DOM_MB_A	HC2	CH4	5200	110
DOM_MB_A	HC2	CO	5200	110
DOM_MB_A	HC2	PM10	5200	110
DOM_MB_A	HC2	PM2_5	5200	110
DOM_MB_A	HC2	TSP	5200	110
DOM_MB_A	HC2	VOC	5200	110
DOM_MB_M	BC1	CH4	5200	130
DOM_MB_M	BC1	CO	5200	130
DOM_MB_M	BC1	PM10	5200	130
DOM_MB_M	BC1	PM2_5	5200	130
DOM_MB_M	BC1	TSP	5200	130
DOM_MB_M	BC1	VOC	5200	130
DOM_MB_M	BC2	CH4	5200	130
DOM_MB_M	BC2	CO	5200	130
DOM_MB_M	BC2	PM10	5200	130
DOM_MB_M	BC2	PM2_5	5200	130
DOM_MB_M	BC2	VOC	5200	130
DOM_MB_M	DC	CH4	5200	120
DOM_MB_M	DC	CO	5200	120
DOM_MB_M	DC	PM10	5200	120
DOM_MB_M	DC	PM2_5	5200	120
DOM_MB_M	DC	TSP	5200	120
DOM_MB_M	DC	VOC	5200	120
DOM_MB_M	FWD	CH4	5200	410
DOM_MB_M	FWD	CO	5200	410
DOM_MB_M	FWD	NH3	5200	410
DOM_MB_M	FWD	NOx	5200	410
DOM_MB_M	FWD	PM10	5200	410
DOM_MB_M	FWD	PM2_5	5200	410
DOM_MB_M	FWD	SO2	5200	410
DOM_MB_M	FWD	TSP	5200	410
DOM_MB_M	FWD	VOC	5200	410
DOM_MB_M	HC1	CH4	5200	110
DOM_MB_M	HC1	CO	5200	110
DOM_MB_M	HC1	PM10	5200	110
DOM_MB_M	HC1	PM2_5	5200	110
DOM_MB_M	HC1	TSP	5200	110
DOM_MB_M	HC1	VOC	5200	110
DOM_MB_M	HC2	CH4	5200	110
DOM_MB_M	HC2	CO	5200	110
DOM_MB_M	HC2	PM10	5200	110
DOM_MB_M	HC2	PM2_5	5200	110
DOM_MB_M	HC2	TSP	5200	110
DOM_MB_M	HC2	VOC	5200	110
DOM_OS	POP	VOC	2711	0
DOM_SHB_A	FWD	CH4	5200	410
DOM_SHB_A	FWD	CO	5200	410
DOM_SHB_A	FWD	NH3	5200	410
DOM_SHB_A	FWD	NOx	5200	410
DOM_SHB_A	FWD	PM10	5200	410
DOM_SHB_A	FWD	PM2_5	5200	410
DOM_SHB_A	FWD	SO2	5200	410
DOM_SHB_A	FWD	TSP	5200	410
DOM_SHB_A	FWD	VOC	5200	410
DOM_SHB_A	HC1	CH4	5200	110
DOM_SHB_A	HC1	CO	5200	110
DOM_SHB_A	HC1	PM10	5200	110
DOM_SHB_A	HC1	PM2_5	5200	110
DOM_SHB_A	HC1	TSP	5200	110
DOM_SHB_A	HC1	VOC	5200	110
DOM_SHB_M	BC1	CH4	5200	130
DOM_SHB_M	BC1	CO	5200	130
DOM_SHB_M	BC1	PM10	5200	130
DOM_SHB_M	BC1	PM2_5	5200	130
DOM_SHB_M	BC1	TSP	5200	130
DOM_SHB_M	BC1	VOC	5200	130
DOM_SHB_M	BC2	CH4	5200	130
DOM_SHB_M	BC2	CO	5200	130
DOM_SHB_M	BC2	PM10	5200	130
DOM_SHB_M	BC2	PM2_5	5200	130
DOM_SHB_M	BC2	VOC	5200	130
DOM_SHB_M	DC	CH4	5200	120
DOM_SHB_M	DC	CO	5200	120
DOM_SHB_M	DC	PM10	5200	120
DOM_SHB_M	DC	PM2_5	5200	120
DOM_SHB_M	DC	TSP	5200	120
DOM_SHB_M	DC	VOC	5200	120
DOM_SHB_M	FWD	CH4	5200	410
DOM_SHB_M	FWD	CO	5200	410
DOM_SHB_M	FWD	NH3	5200	410
DOM_SHB_M	FWD	NOx	5200	410
DOM_SHB_M	FWD	PM10	5200	410
DOM_SHB_M	FWD	PM2_5	5200	410
DOM_SHB_M	FWD	SO2	5200	410
DOM_SHB_M	FWD	TSP	5200	410
DOM_SHB_M	FWD	VOC	5200	410
DOM_SHB_M	HC1	CH4	5200	110
DOM_SHB_M	HC1	CO	5200	110
DOM_SHB_M	HC1	PM10	5200	110
DOM_SHB_M	HC1	PM2_5	5200	110
DOM_SHB_M	HC1	TSP	5200	110
DOM_SHB_M	HC1	VOC	5200	110
DOM_SHB_M	HC2	CH4	5200	110
DOM_SHB_M	HC2	CO	5200	110
DOM_SHB_M	HC2	PM10	5200	110
DOM_SHB_M	HC2	PM2_5	5200	110
DOM_SHB_M	HC2	TSP	5200	110
DOM_SHB_M	HC2	VOC	5200	110
DOM_STOVE_C	FWD	CH4	5200	410
DOM_STOVE_C	FWD	CO	5200	410
DOM_STOVE_C	FWD	PM10	5200	410
DOM_STOVE_C	FWD	PM2_5	5200	410
DOM_STOVE_C	FWD	TSP	5200	410
DOM_STOVE_C	FWD	VOC	5200	410
DOM_STOVE_H	BC1	CH4	5200	130
DOM_STOVE_H	BC1	CO	5200	130
DOM_STOVE_H	BC1	PM10	5200	130
DOM_STOVE_H	BC1	PM2_5	5200	130
DOM_STOVE_H	BC1	TSP	5200	130
DOM_STOVE_H	BC1	VOC	5200	130
DOM_STOVE_H	BC2	CH4	5200	130
DOM_STOVE_H	BC2	CO	5200	130
DOM_STOVE_H	BC2	PM10	5200	130
DOM_STOVE_H	BC2	PM2_5	5200	130
DOM_STOVE_H	BC2	TSP	5200	130
DOM_STOVE_H	BC2	VOC	5200	130
DOM_STOVE_H	DC	CH4	5200	120
DOM_STOVE_H	DC	CO	5200	120
DOM_STOVE_H	DC	PM10	5200	120
DOM_STOVE_H	DC	PM2_5	5200	120
DOM_STOVE_H	DC	TSP	5200	120
DOM_STOVE_H	DC	VOC	5200	120
DOM_STOVE_H	FWD	CH4	5200	410
DOM_STOVE_H	FWD	CO	5200	410
DOM_STOVE_H	FWD	NH3	5200	410
DOM_STOVE_H	FWD	NOx	5200	410
DOM_STOVE_H	FWD	PM10	5200	410
DOM_STOVE_H	FWD	PM2_5	5200	410
DOM_STOVE_H	FWD	SO2	5200	410
DOM_STOVE_H	FWD	TSP	5200	410
DOM_STOVE_H	FWD	VOC	5200	410
DOM_STOVE_H	HC1	CH4	5200	110
DOM_STOVE_H	HC1	CO	5200	110
DOM_STOVE_H	HC1	PM10	5200	110
DOM_STOVE_H	HC1	PM2_5	5200	110
DOM_STOVE_H	HC1	TSP	5200	110
DOM_STOVE_H	HC1	VOC	5200	110
DOM_STOVE_H	HC2	CH4	5200	110
DOM_STOVE_H	HC2	CO	5200	110
DOM_STOVE_H	HC2	PM10	5200	110
DOM_STOVE_H	HC2	PM2_5	5200	110
DOM_STOVE_H	HC2	TSP	5200	110
DOM_STOVE_H	HC2	VOC	5200	110
DRY	TEX	VOC	2714	0
DRY_NEW	TEX	VOC	2714	0
EXD_GAS	EMI	VOC	1600	0
EXD_GAS_NEW	EMI	VOC	1600	0
EXD_LQ	EMI	VOC	1510	0
EXD_LQ_NEW	EMI	VOC	1510	0
FATOIL	SD	VOC	2715	0
FCON_OTHN	NOF	NH3	6310	0
FCON_UREA	NOF	NH3	6540	0
FERTPRO	NOF	NH3	2320	0
FOOD	POP	VOC	2520	0
GLUE_INH	ADH	VOC	2715	0
GLUE_INT	ADH	VOC	2715	0
GRAZE_L	EX_CTTL	N2O	6350	0
GRAZE_L	EX_SH	N2O	6350	0
GRAZE_M	EX_CTTL	N2O	6350	0
GRAZE_M	EX_SH	N2O	6350	0
GRAZE_S	EX_CTTL	N2O	6350	0
GRAZE_S	EX_SH	N2O	6350	0
HISTOSOLS	AREA	N2O	6420	0
IN_BO_CHEM	BC1	CH4	2310	130
IN_BO_CHEM	BC1	CO	2310	130
IN_BO_CHEM	BC1	CO2	2310	130
IN_BO_CHEM	BC1	N2O	2310	130
IN_BO_CHEM	BC1	NH3	2310	130
IN_BO_CHEM	BC1	NOX	2310	130
IN_BO_CHEM	BC1	PM10	2310	130
IN_BO_CHEM	BC1	PM2_5	2310	130
IN_BO_CHEM	BC1	SO2	2310	130
IN_BO_CHEM	BC1	TSP	2310	130
IN_BO_CHEM	BC1	VOC	2310	130
IN_BO_CHEM	BC2	CH4	2310	130
IN_BO_CHEM	BC2	NH3	2310	130
IN_BO_CHEM	BC2	NOX	2310	130
IN_BO_CHEM	BC2	PM10	2310	130
IN_BO_CHEM	BC2	PM2_5	2310	130
IN_BO_CHEM	BC2	SO2	2310	130
IN_BO_CHEM	BC2	VOC	2310	130
IN_BO_CHEM	DC	CH4	2310	120
IN_BO_CHEM	DC	CO	2310	120
IN_BO_CHEM	DC	CO2	2310	120
IN_BO_CHEM	DC	N2O	2310	120
IN_BO_CHEM	DC	NH3	2310	120
IN_BO_CHEM	DC	NOX	2310	120
IN_BO_CHEM	DC	PM10	2310	120
IN_BO_CHEM	DC	PM2_5	2310	120
IN_BO_CHEM	DC	SO2	2310	120
IN_BO_CHEM	DC	TSP	2310	120
IN_BO_CHEM	DC	VOC	2310	120
IN_BO_CHEM	GAS	CH4	2310	300
IN_BO_CHEM	GAS	CO	2310	300
IN_BO_CHEM	GAS	CO2	2310	300
IN_BO_CHEM	GAS	N2O	2310	300
IN_BO_CHEM	GAS	NH3	2310	300
IN_BO_CHEM	GAS	NOX	2310	300
IN_BO_CHEM	GAS	PM10	2310	300
IN_BO_CHEM	GAS	PM2_5	2310	300
IN_BO_CHEM	GAS	SO2	2310	300
IN_BO_CHEM	GAS	TSP	2310	300
IN_BO_CHEM	GAS	VOC	2310	300
IN_BO_CHEM	GSL	CH4	2310	230
IN_BO_CHEM	GSL	CO	2310	230
IN_BO_CHEM	GSL	CO2	2310	230
IN_BO_CHEM	GSL	N2O	2310	230
IN_BO_CHEM	GSL	NH3	2310	230
IN_BO_CHEM	GSL	NOX	2310	230
IN_BO_CHEM	GSL	PM10	2310	230
IN_BO_CHEM	GSL	PM2_5	2310	230
IN_BO_CHEM	GSL	SO2	2310	230
IN_BO_CHEM	GSL	TSP	2310	230
IN_BO_CHEM	GSL	VOC	2310	230
IN_BO_CHEM	HC1	CH4	2310	110
IN_BO_CHEM	HC1	CO	2310	110
IN_BO_CHEM	HC1	CO2	2310	110
IN_BO_CHEM	HC1	N2O	2310	110
IN_BO_CHEM	HC1	NH3	2310	110
IN_BO_CHEM	HC1	NOX	2310	110
IN_BO_CHEM	HC1	PM10	2310	110
IN_BO_CHEM	HC1	PM2_5	2310	110
IN_BO_CHEM	HC1	SO2	2310	110
IN_BO_CHEM	HC1	TSP	2310	110
IN_BO_CHEM	HC1	VOC	2310	110
IN_BO_CHEM	HF	CH4	2310	260
IN_BO_CHEM	HF	CO	2310	260
IN_BO_CHEM	HF	CO2	2310	260
IN_BO_CHEM	HF	N2O	2310	260
IN_BO_CHEM	HF	NH3	2310	260
IN_BO_CHEM	HF	NOX	2310	260
IN_BO_CHEM	HF	PM10	2310	260
IN_BO_CHEM	HF	PM2_5	2310	260
IN_BO_CHEM	HF	SO2	2310	260
IN_BO_CHEM	HF	TSP	2310	260
IN_BO_CHEM	HF	VOC	2310	260
IN_BO_CHEM	LPG	CH4	2310	220
IN_BO_CHEM	LPG	CO	2310	220
IN_BO_CHEM	LPG	CO2	2310	220
IN_BO_CHEM	LPG	N2O	2310	220
IN_BO_CHEM	LPG	NH3	2310	220
IN_BO_CHEM	LPG	NOX	2310	220
IN_BO_CHEM	LPG	PM10	2310	220
IN_BO_CHEM	LPG	PM2_5	2310	220
IN_BO_CHEM	LPG	TSP	2310	220
IN_BO_CHEM	MD	CH4	2310	250
IN_BO_CHEM	MD	CO	2310	250
IN_BO_CHEM	MD	CO2	2310	250
IN_BO_CHEM	MD	N2O	2310	250
IN_BO_CHEM	MD	NH3	2310	250
IN_BO_CHEM	MD	NOX	2310	250
IN_BO_CHEM	MD	PM10	2310	250
IN_BO_CHEM	MD	PM2_5	2310	250
IN_BO_CHEM	MD	SO2	2310	250
IN_BO_CHEM	MD	TSP	2310	250
IN_BO_CHEM	MD	VOC	2310	250
IN_BO_CHEM	OS1	CH4	2310	400
IN_BO_CHEM	OS1	CO	2310	400
IN_BO_CHEM	OS1	CO2	2310	400
IN_BO_CHEM	OS1	CO2_BIO	2310	400
IN_BO_CHEM	OS1	N2O	2310	400
IN_BO_CHEM	OS1	NH3	2310	400
IN_BO_CHEM	OS1	NOX	2310	400
IN_BO_CHEM	OS1	PM10	2310	400
IN_BO_CHEM	OS1	PM2_5	2310	400
IN_BO_CHEM	OS1	SO2	2310	400
IN_BO_CHEM	OS1	TSP	2310	400
IN_BO_CHEM	OS1	VOC	2310	400
IN_BO_CHEM	OS2	CH4	2310	500
IN_BO_CHEM	OS2	CO	2310	500
IN_BO_CHEM	OS2	N2O	2310	500
IN_BO_CHEM	OS2	NH3	2310	500
IN_BO_CHEM	OS2	NOX	2310	500
IN_BO_CHEM	OS2	PM10	2310	500
IN_BO_CHEM	OS2	PM2_5	2310	500
IN_BO_CHEM	OS2	SO2	2310	500
IN_BO_CHEM	OS2	TSP	2310	500
IN_BO_CHEM	OS2	VOC	2310	500
IN_BO_CHEM	WSFNR	CO2	2310	500
IN_BO_CON	BC1	CH4	1210	130
IN_BO_CON	BC1	CO	1210	130
IN_BO_CON	BC1	CO2	1210	130
IN_BO_CON	BC1	N2O	1210	130
IN_BO_CON	BC1	NH3	1210	130
IN_BO_CON	BC1	NOX	1210	130
IN_BO_CON	BC1	PM10	1210	130
IN_BO_CON	BC1	PM2_5	1210	130
IN_BO_CON	BC1	SO2	1210	130
IN_BO_CON	BC1	TSP	1210	130
IN_BO_CON	BC1	VOC	1210	130
IN_BO_CON	DC	CH4	1210	120
IN_BO_CON	DC	CO	1210	120
IN_BO_CON	DC	CO2	1210	120
IN_BO_CON	DC	N2O	1210	120
IN_BO_CON	DC	NH3	1210	120
IN_BO_CON	DC	NOX	1210	120
IN_BO_CON	DC	PM10	1210	120
IN_BO_CON	DC	PM2_5	1210	120
IN_BO_CON	DC	SO2	1210	120
IN_BO_CON	DC	TSP	1210	120
IN_BO_CON	DC	VOC	1210	120
IN_BO_CON	GAS	CH4	1210	300
IN_BO_CON	GAS	CO	1210	300
IN_BO_CON	GAS	CO2	1210	300
IN_BO_CON	GAS	N2O	1210	300
IN_BO_CON	GAS	NH3	1210	300
IN_BO_CON	GAS	NOX	1210	300
IN_BO_CON	GAS	PM10	1210	300
IN_BO_CON	GAS	PM2_5	1210	300
IN_BO_CON	GAS	SO2	1210	300
IN_BO_CON	GAS	TSP	1210	300
IN_BO_CON	GAS	VOC	1210	300
IN_BO_CON	GSL	CH4	1210	230
IN_BO_CON	GSL	CO	1210	230
IN_BO_CON	GSL	CO2	1210	230
IN_BO_CON	GSL	N2O	1210	230
IN_BO_CON	GSL	NH3	1210	230
IN_BO_CON	GSL	NOX	1210	230
IN_BO_CON	GSL	PM10	1210	230
IN_BO_CON	GSL	PM2_5	1210	230
IN_BO_CON	GSL	SO2	1210	230
IN_BO_CON	GSL	TSP	1210	230
IN_BO_CON	GSL	VOC	1210	230
IN_BO_CON	HC1	CH4	1210	110
IN_BO_CON	HC1	CO	1210	110
IN_BO_CON	HC1	CO2	1210	110
IN_BO_CON	HC1	N2O	1210	110
IN_BO_CON	HC1	NH3	1210	110
IN_BO_CON	HC1	NOX	1210	110
IN_BO_CON	HC1	PM10	1210	110
IN_BO_CON	HC1	PM2_5	1210	110
IN_BO_CON	HC1	SO2	1210	110
IN_BO_CON	HC1	TSP	1210	110
IN_BO_CON	HC1	VOC	1210	110
IN_BO_CON	HF	CH4	1210	260
IN_BO_CON	HF	CO	1210	260
IN_BO_CON	HF	CO2	1210	260
IN_BO_CON	HF	N2O	1210	260
IN_BO_CON	HF	NH3	1210	260
IN_BO_CON	HF	NOX	1210	260
IN_BO_CON	HF	PM10	1210	260
IN_BO_CON	HF	PM2_5	1210	260
IN_BO_CON	HF	SO2	1210	260
IN_BO_CON	HF	TSP	1210	260
IN_BO_CON	HF	VOC	1210	260
IN_BO_CON	LPG	CH4	1210	220
IN_BO_CON	LPG	CO	1210	220
IN_BO_CON	LPG	CO2	1210	220
IN_BO_CON	LPG	N2O	1210	220
IN_BO_CON	LPG	NH3	1210	220
IN_BO_CON	LPG	NOX	1210	220
IN_BO_CON	LPG	PM10	1210	220
IN_BO_CON	LPG	PM2_5	1210	220
IN_BO_CON	LPG	TSP	1210	220
IN_BO_CON	MD	CH4	1210	250
IN_BO_CON	MD	CO	1210	250
IN_BO_CON	MD	CO2	1210	250
IN_BO_CON	MD	N2O	1210	250
IN_BO_CON	MD	NH3	1210	250
IN_BO_CON	MD	NOX	1210	250
IN_BO_CON	MD	PM10	1210	250
IN_BO_CON	MD	PM2_5	1210	250
IN_BO_CON	MD	SO2	1210	250
IN_BO_CON	MD	TSP	1210	250
IN_BO_CON	MD	VOC	1210	250
IN_BO_CON	OS1	CH4	1210	400
IN_BO_CON	OS1	CO	1210	400
IN_BO_CON	OS1	CO2	1210	400
IN_BO_CON	OS1	CO2_BIO	1210	400
IN_BO_CON	OS1	N2O	1210	400
IN_BO_CON	OS1	NH3	1210	400
IN_BO_CON	OS1	NOX	1210	400
IN_BO_CON	OS1	PM10	1210	400
IN_BO_CON	OS1	PM2_5	1210	400
IN_BO_CON	OS1	SO2	1210	400
IN_BO_CON	OS1	TSP	1210	400
IN_BO_CON	OS1	VOC	1210	400
IN_BO_CON	OS2	CH4	1210	500
IN_BO_CON	OS2	CO	1210	500
IN_BO_CON	OS2	N2O	1210	500
IN_BO_CON	OS2	NH3	1210	500
IN_BO_CON	OS2	NOX	1210	500
IN_BO_CON	OS2	PM10	1210	500
IN_BO_CON	OS2	PM2_5	1210	500
IN_BO_CON	OS2	SO2	1210	500
IN_BO_CON	OS2	TSP	1210	500
IN_BO_CON	OS2	VOC	1210	500
IN_BO_CON	WSFNR	CO2	1210	500
IN_BO_OTH	DC	CH4	-999	120
IN_BO_OTH	DC	CO	-999	120
IN_BO_OTH	DC	CO2	-999	120
IN_BO_OTH	DC	N2O	-999	120
IN_BO_OTH	DC	NH3	-999	120
IN_BO_OTH	DC	NOX	-999	120
IN_BO_OTH	DC	PM10	-999	120
IN_BO_OTH	DC	PM2_5	-999	120
IN_BO_OTH	DC	SO2	-999	120
IN_BO_OTH	DC	TSP	-999	120
IN_BO_OTH	DC	VOC	-999	120
IN_BO_OTH	GAS	CH4	-999	300
IN_BO_OTH	GAS	CO	-999	300
IN_BO_OTH	GAS	CO2	-999	300
IN_BO_OTH	GAS	N2O	-999	300
IN_BO_OTH	GAS	NH3	-999	300
IN_BO_OTH	GAS	NOX	-999	300
IN_BO_OTH	GAS	PM10	-999	300
IN_BO_OTH	GAS	PM2_5	-999	300
IN_BO_OTH	GAS	SO2	-999	300
IN_BO_OTH	GAS	TSP	-999	300
IN_BO_OTH	GAS	VOC	-999	300
IN_BO_OTH	GSL	CH4	-999	230
IN_BO_OTH	GSL	CO	-999	230
IN_BO_OTH	GSL	CO2	-999	230
IN_BO_OTH	GSL	N2O	-999	230
IN_BO_OTH	GSL	NH3	-999	230
IN_BO_OTH	GSL	NOX	-999	230
IN_BO_OTH	GSL	PM10	-999	230
IN_BO_OTH	GSL	PM2_5	-999	230
IN_BO_OTH	GSL	SO2	-999	230
IN_BO_OTH	GSL	TSP	-999	230
IN_BO_OTH	GSL	VOC	-999	230
IN_BO_OTH	HF	CH4	-999	260
IN_BO_OTH	HF	CO	-999	260
IN_BO_OTH	HF	CO2	-999	260
IN_BO_OTH	HF	N2O	-999	260
IN_BO_OTH	HF	NH3	-999	260
IN_BO_OTH	HF	NOX	-999	260
IN_BO_OTH	HF	PM10	-999	260
IN_BO_OTH	HF	PM2_5	-999	260
IN_BO_OTH	HF	SO2	-999	260
IN_BO_OTH	HF	TSP	-999	260
IN_BO_OTH	HF	VOC	-999	260
IN_BO_OTH	LPG	CH4	-999	220
IN_BO_OTH	LPG	CO	-999	220
IN_BO_OTH	LPG	CO2	-999	220
IN_BO_OTH	LPG	N2O	-999	220
IN_BO_OTH	LPG	NH3	-999	220
IN_BO_OTH	LPG	NOX	-999	220
IN_BO_OTH	LPG	PM10	-999	220
IN_BO_OTH	LPG	PM2_5	-999	220
IN_BO_OTH	LPG	TSP	-999	220
IN_BO_OTH	MD	CH4	-999	250
IN_BO_OTH	MD	CO	-999	250
IN_BO_OTH	MD	CO2	-999	250
IN_BO_OTH	MD	N2O	-999	250
IN_BO_OTH	MD	NH3	-999	250
IN_BO_OTH	MD	NOX	-999	250
IN_BO_OTH	MD	PM10	-999	250
IN_BO_OTH	MD	PM2_5	-999	250
IN_BO_OTH	MD	SO2	-999	250
IN_BO_OTH	MD	TSP	-999	250
IN_BO_OTH	MD	VOC	-999	250
IN_BO_OTH	OS1	CH4	-999	400
IN_BO_OTH	OS1	CO	-999	400
IN_BO_OTH	OS1	CO2	-999	400
IN_BO_OTH	OS1	CO2_BIO	-999	400
IN_BO_OTH	OS1	N2O	-999	400
IN_BO_OTH	OS1	NH3	-999	400
IN_BO_OTH	OS1	NOX	-999	400
IN_BO_OTH	OS1	PM10	-999	400
IN_BO_OTH	OS1	PM2_5	-999	400
IN_BO_OTH	OS1	SO2	-999	400
IN_BO_OTH	OS1	TSP	-999	400
IN_BO_OTH	OS1	VOC	-999	400
IN_BO_OTH	OS2	CH4	-999	500
IN_BO_OTH	OS2	CO	-999	500
IN_BO_OTH	OS2	N2O	-999	500
IN_BO_OTH	OS2	NH3	-999	500
IN_BO_OTH	OS2	NOX	-999	500
IN_BO_OTH	OS2	PM10	-999	500
IN_BO_OTH	OS2	PM2_5	-999	500
IN_BO_OTH	OS2	SO2	-999	500
IN_BO_OTH	OS2	TSP	-999	500
IN_BO_OTH	OS2	VOC	-999	500
IN_BO_OTH	WSFNR	CO2	-999	500
IN_BO_OTH_L	BC1	CH4	-999	130
IN_BO_OTH_L	BC1	CO	-999	130
IN_BO_OTH_L	BC1	CO2	-999	130
IN_BO_OTH_L	BC1	N2O	-999	130
IN_BO_OTH_L	BC1	NH3	-999	130
IN_BO_OTH_L	BC1	NOX	-999	130
IN_BO_OTH_L	BC1	PM10	-999	130
IN_BO_OTH_L	BC1	PM2_5	-999	130
IN_BO_OTH_L	BC1	SO2	-999	130
IN_BO_OTH_L	BC1	TSP	-999	130
IN_BO_OTH_L	BC1	VOC	-999	130
IN_BO_OTH_L	BC2	CH4	-999	130
IN_BO_OTH_L	BC2	CO	-999	130
IN_BO_OTH_L	BC2	CO2	-999	130
IN_BO_OTH_L	BC2	N2O	-999	130
IN_BO_OTH_L	BC2	NH3	-999	130
IN_BO_OTH_L	BC2	NOX	-999	130
IN_BO_OTH_L	BC2	PM10	-999	130
IN_BO_OTH_L	BC2	PM2_5	-999	130
IN_BO_OTH_L	BC2	SO2	-999	130
IN_BO_OTH_L	BC2	VOC	-999	130
IN_BO_OTH_L	HC1	CH4	-999	110
IN_BO_OTH_L	HC1	CO	-999	110
IN_BO_OTH_L	HC1	CO2	-999	110
IN_BO_OTH_L	HC1	N2O	-999	110
IN_BO_OTH_L	HC1	NH3	-999	110
IN_BO_OTH_L	HC1	NOX	-999	110
IN_BO_OTH_L	HC1	PM10	-999	110
IN_BO_OTH_L	HC1	PM2_5	-999	110
IN_BO_OTH_L	HC1	SO2	-999	110
IN_BO_OTH_L	HC1	TSP	-999	110
IN_BO_OTH_L	HC1	VOC	-999	110
IN_BO_OTH_L	HC2	CH4	-999	110
IN_BO_OTH_L	HC2	CO	-999	110
IN_BO_OTH_L	HC2	CO2	-999	110
IN_BO_OTH_L	HC2	N2O	-999	110
IN_BO_OTH_L	HC2	NH3	-999	110
IN_BO_OTH_L	HC2	NOX	-999	110
IN_BO_OTH_L	HC2	PM10	-999	110
IN_BO_OTH_L	HC2	PM2_5	-999	110
IN_BO_OTH_L	HC2	SO2	-999	110
IN_BO_OTH_L	HC2	TSP	-999	110
IN_BO_OTH_L	HC2	VOC	-999	110
IN_BO_OTH_S	BC1	CH4	-999	130
IN_BO_OTH_S	BC1	CO	-999	130
IN_BO_OTH_S	BC1	CO2	-999	130
IN_BO_OTH_S	BC1	N2O	-999	130
IN_BO_OTH_S	BC1	NH3	-999	130
IN_BO_OTH_S	BC1	NOX	-999	130
IN_BO_OTH_S	BC1	PM10	-999	130
IN_BO_OTH_S	BC1	PM2_5	-999	130
IN_BO_OTH_S	BC1	SO2	-999	130
IN_BO_OTH_S	BC1	TSP	-999	130
IN_BO_OTH_S	BC1	VOC	-999	130
IN_BO_OTH_S	BC2	CH4	-999	130
IN_BO_OTH_S	BC2	CO	-999	130
IN_BO_OTH_S	BC2	CO2	-999	130
IN_BO_OTH_S	BC2	N2O	-999	130
IN_BO_OTH_S	BC2	NH3	-999	130
IN_BO_OTH_S	BC2	NOX	-999	130
IN_BO_OTH_S	BC2	PM10	-999	130
IN_BO_OTH_S	BC2	PM2_5	-999	130
IN_BO_OTH_S	BC2	SO2	-999	130
IN_BO_OTH_S	BC2	VOC	-999	130
IN_BO_OTH_S	HC1	CH4	-999	110
IN_BO_OTH_S	HC1	CO	-999	110
IN_BO_OTH_S	HC1	CO2	-999	110
IN_BO_OTH_S	HC1	N2O	-999	110
IN_BO_OTH_S	HC1	NH3	-999	110
IN_BO_OTH_S	HC1	NOX	-999	110
IN_BO_OTH_S	HC1	PM10	-999	110
IN_BO_OTH_S	HC1	PM2_5	-999	110
IN_BO_OTH_S	HC1	SO2	-999	110
IN_BO_OTH_S	HC1	TSP	-999	110
IN_BO_OTH_S	HC1	VOC	-999	110
IN_BO_OTH_S	HC2	CH4	-999	110
IN_BO_OTH_S	HC2	CO	-999	110
IN_BO_OTH_S	HC2	CO2	-999	110
IN_BO_OTH_S	HC2	N2O	-999	110
IN_BO_OTH_S	HC2	NH3	-999	110
IN_BO_OTH_S	HC2	NOX	-999	110
IN_BO_OTH_S	HC2	PM10	-999	110
IN_BO_OTH_S	HC2	PM2_5	-999	110
IN_BO_OTH_S	HC2	SO2	-999	110
IN_BO_OTH_S	HC2	TSP	-999	110
IN_BO_OTH_S	HC2	VOC	-999	110
IN_BO_PAP	BC1	CH4	2410	130
IN_BO_PAP	BC1	CO	2410	130
IN_BO_PAP	BC1	CO2	2410	130
IN_BO_PAP	BC1	N2O	2410	130
IN_BO_PAP	BC1	NH3	2410	130
IN_BO_PAP	BC1	NOX	2410	130
IN_BO_PAP	BC1	PM10	2410	130
IN_BO_PAP	BC1	PM2_5	2410	130
IN_BO_PAP	BC1	SO2	2410	130
IN_BO_PAP	BC1	TSP	2410	130
IN_BO_PAP	BC1	VOC	2410	130
IN_BO_PAP	BC2	CH4	2410	130
IN_BO_PAP	BC2	NH3	2410	130
IN_BO_PAP	BC2	NOX	2410	130
IN_BO_PAP	BC2	PM10	2410	130
IN_BO_PAP	BC2	PM2_5	2410	130
IN_BO_PAP	BC2	SO2	2410	130
IN_BO_PAP	BC2	VOC	2410	130
IN_BO_PAP	DC	CH4	2410	120
IN_BO_PAP	DC	CO	2410	120
IN_BO_PAP	DC	CO2	2410	120
IN_BO_PAP	DC	N2O	2410	120
IN_BO_PAP	DC	NH3	2410	120
IN_BO_PAP	DC	NOX	2410	120
IN_BO_PAP	DC	PM10	2410	120
IN_BO_PAP	DC	PM2_5	2410	120
IN_BO_PAP	DC	SO2	2410	120
IN_BO_PAP	DC	TSP	2410	120
IN_BO_PAP	DC	VOC	2410	120
IN_BO_PAP	GAS	CH4	2410	300
IN_BO_PAP	GAS	CO	2410	300
IN_BO_PAP	GAS	CO2	2410	300
IN_BO_PAP	GAS	N2O	2410	300
IN_BO_PAP	GAS	NH3	2410	300
IN_BO_PAP	GAS	NOX	2410	300
IN_BO_PAP	GAS	PM10	2410	300
IN_BO_PAP	GAS	PM2_5	2410	300
IN_BO_PAP	GAS	SO2	2410	300
IN_BO_PAP	GAS	TSP	2410	300
IN_BO_PAP	GAS	VOC	2410	300
IN_BO_PAP	GSL	CH4	2410	230
IN_BO_PAP	GSL	CO	2410	230
IN_BO_PAP	GSL	CO2	2410	230
IN_BO_PAP	GSL	N2O	2410	230
IN_BO_PAP	GSL	NH3	2410	230
IN_BO_PAP	GSL	NOX	2410	230
IN_BO_PAP	GSL	PM10	2410	230
IN_BO_PAP	GSL	PM2_5	2410	230
IN_BO_PAP	GSL	SO2	2410	230
IN_BO_PAP	GSL	VOC	2410	230
IN_BO_PAP	HC1	CH4	2410	110
IN_BO_PAP	HC1	CO	2410	110
IN_BO_PAP	HC1	CO2	2410	110
IN_BO_PAP	HC1	N2O	2410	110
IN_BO_PAP	HC1	NH3	2410	110
IN_BO_PAP	HC1	NOX	2410	110
IN_BO_PAP	HC1	PM10	2410	110
IN_BO_PAP	HC1	PM2_5	2410	110
IN_BO_PAP	HC1	SO2	2410	110
IN_BO_PAP	HC1	TSP	2410	110
IN_BO_PAP	HC1	VOC	2410	110
IN_BO_PAP	HF	CH4	2410	260
IN_BO_PAP	HF	CO	2410	260
IN_BO_PAP	HF	CO2	2410	260
IN_BO_PAP	HF	N2O	2410	260
IN_BO_PAP	HF	NH3	2410	260
IN_BO_PAP	HF	NOX	2410	260
IN_BO_PAP	HF	PM10	2410	260
IN_BO_PAP	HF	PM2_5	2410	260
IN_BO_PAP	HF	SO2	2410	260
IN_BO_PAP	HF	TSP	2410	260
IN_BO_PAP	HF	VOC	2410	260
IN_BO_PAP	LPG	CH4	2410	220
IN_BO_PAP	LPG	CO	2410	220
IN_BO_PAP	LPG	CO2	2410	220
IN_BO_PAP	LPG	N2O	2410	220
IN_BO_PAP	LPG	NH3	2410	220
IN_BO_PAP	LPG	NOX	2410	220
IN_BO_PAP	LPG	PM10	2410	220
IN_BO_PAP	LPG	PM2_5	2410	220
IN_BO_PAP	LPG	TSP	2410	220
IN_BO_PAP	MD	CH4	2410	250
IN_BO_PAP	MD	CO	2410	250
IN_BO_PAP	MD	CO2	2410	250
IN_BO_PAP	MD	N2O	2410	250
IN_BO_PAP	MD	NH3	2410	250
IN_BO_PAP	MD	NOX	2410	250
IN_BO_PAP	MD	PM10	2410	250
IN_BO_PAP	MD	PM2_5	2410	250
IN_BO_PAP	MD	SO2	2410	250
IN_BO_PAP	MD	TSP	2410	250
IN_BO_PAP	MD	VOC	2410	250
IN_BO_PAP	OS1	CH4	2410	400
IN_BO_PAP	OS1	CO	2410	400
IN_BO_PAP	OS1	CO2	2410	400
IN_BO_PAP	OS1	CO2_BIO	2410	400
IN_BO_PAP	OS1	N2O	2410	400
IN_BO_PAP	OS1	NH3	2410	400
IN_BO_PAP	OS1	NOX	2410	400
IN_BO_PAP	OS1	PM10	2410	400
IN_BO_PAP	OS1	PM2_5	2410	400
IN_BO_PAP	OS1	SO2	2410	400
IN_BO_PAP	OS1	TSP	2410	400
IN_BO_PAP	OS1	VOC	2410	400
IN_BO_PAP	OS2	CH4	2410	500
IN_BO_PAP	OS2	CO	2410	500
IN_BO_PAP	OS2	N2O	2410	500
IN_BO_PAP	OS2	NH3	2410	500
IN_BO_PAP	OS2	NOX	2410	500
IN_BO_PAP	OS2	PM10	2410	500
IN_BO_PAP	OS2	PM2_5	2410	500
IN_BO_PAP	OS2	SO2	2410	500
IN_BO_PAP	OS2	TSP	2410	500
IN_BO_PAP	OS2	VOC	2410	500
IN_BO_PAP	WSFNR	CO2	2410	500
IN_OC	BC1	CH4	-999	130
IN_OC	BC1	N2O	-999	130
IN_OC	BC1	NH3	-999	130
IN_OC	BC1	NOX	-999	130
IN_OC	BC1	SO2	-999	130
IN_OC	BC1	VOC	-999	130
IN_OC	BC2	CH4	-999	130
IN_OC	BC2	N2O	-999	130
IN_OC	BC2	NH3	-999	130
IN_OC	BC2	NOX	-999	130
IN_OC	BC2	SO2	-999	130
IN_OC	BC2	VOC	-999	130
IN_OC	DC	CH4	-999	120
IN_OC	DC	CO	-999	120
IN_OC	DC	N2O	-999	120
IN_OC	DC	NH3	-999	120
IN_OC	DC	NOX	-999	120
IN_OC	DC	PM10	-999	120
IN_OC	DC	PM2_5	-999	120
IN_OC	DC	SO2	-999	120
IN_OC	DC	TSP	-999	120
IN_OC	DC	VOC	-999	120
IN_OC	GAS	CH4	-999	300
IN_OC	GAS	CO	-999	300
IN_OC	GAS	N2O	-999	300
IN_OC	GAS	NH3	-999	300
IN_OC	GAS	NOX	-999	300
IN_OC	GAS	PM10	-999	300
IN_OC	GAS	PM2_5	-999	300
IN_OC	GAS	SO2	-999	300
IN_OC	GAS	TSP	-999	300
IN_OC	GAS	VOC	-999	300
IN_OC	GSL	CH4	-999	230
IN_OC	GSL	CO	-999	230
IN_OC	GSL	N2O	-999	230
IN_OC	GSL	NH3	-999	230
IN_OC	GSL	NOX	-999	230
IN_OC	GSL	PM10	-999	230
IN_OC	GSL	PM2_5	-999	230
IN_OC	GSL	SO2	-999	230
IN_OC	GSL	TSP	-999	230
IN_OC	GSL	VOC	-999	230
IN_OC	HC1	CH4	-999	110
IN_OC	HC1	N2O	-999	110
IN_OC	HC1	NH3	-999	110
IN_OC	HC1	NOX	-999	110
IN_OC	HC1	SO2	-999	110
IN_OC	HC1	VOC	-999	110
IN_OC	HF	CH4	-999	260
IN_OC	HF	CO	-999	260
IN_OC	HF	N2O	-999	260
IN_OC	HF	NH3	-999	260
IN_OC	HF	NOX	-999	260
IN_OC	HF	PM10	-999	260
IN_OC	HF	PM2_5	-999	260
IN_OC	HF	SO2	-999	260
IN_OC	HF	TSP	-999	260
IN_OC	HF	VOC	-999	260
IN_OC	LPG	CH4	-999	220
IN_OC	LPG	CO	-999	220
IN_OC	LPG	N2O	-999	220
IN_OC	LPG	NH3	-999	220
IN_OC	LPG	NOX	-999	220
IN_OC	LPG	PM10	-999	220
IN_OC	LPG	PM2_5	-999	220
IN_OC	LPG	TSP	-999	220
IN_OC	MD	CH4	-999	250
IN_OC	MD	CO	-999	250
IN_OC	MD	N2O	-999	250
IN_OC	MD	NH3	-999	250
IN_OC	MD	NOX	-999	250
IN_OC	MD	PM10	-999	250
IN_OC	MD	PM2_5	-999	250
IN_OC	MD	SO2	-999	250
IN_OC	MD	TSP	-999	250
IN_OC	MD	VOC	-999	250
IN_OC	OS1	CH4	-999	400
IN_OC	OS1	CO	-999	400
IN_OC	OS1	CO2	-999	400
IN_OC	OS1	CO2_BIO	-999	400
IN_OC	OS1	N2O	-999	400
IN_OC	OS1	NH3	-999	400
IN_OC	OS1	NOX	-999	400
IN_OC	OS1	PM10	-999	400
IN_OC	OS1	PM2_5	-999	400
IN_OC	OS1	SO2	-999	400
IN_OC	OS1	TSP	-999	400
IN_OC	OS1	VOC	-999	400
IN_OC	OS2	CH4	-999	500
IN_OC	OS2	CO	-999	500
IN_OC	OS2	N2O	-999	500
IN_OC	OS2	NH3	-999	500
IN_OC	OS2	NOX	-999	500
IN_OC	OS2	PM10	-999	500
IN_OC	OS2	PM2_5	-999	500
IN_OC	OS2	SO2	-999	500
IN_OC	OS2	TSP	-999	500
IN_OC	OS2	VOC	-999	500
IN_OC	REN	NOX	-999	460
IN_OC	REN	SO2	-999	460
IN_OC3	BC1	CO	-999	130
IN_OC3	BC1	PM10	-999	130
IN_OC3	BC1	PM2_5	-999	130
IN_OC3	BC1	TSP	-999	130
IN_OC3	BC2	CO	-999	130
IN_OC3	BC2	PM10	-999	130
IN_OC3	BC2	PM2_5	-999	130
IN_OC3	HC1	CO	-999	110
IN_OC3	HC1	PM10	-999	110
IN_OC3	HC1	PM2_5	-999	110
IN_OC3	HC1	TSP	-999	110
IN_OCTOT	BC1	CO2	-999	130
IN_OCTOT	BC2	CO2	-999	130
IN_OCTOT	DC	CO2	-999	120
IN_OCTOT	GAS	CO2	-999	300
IN_OCTOT	GSL	CO2	-999	230
IN_OCTOT	HC1	CO2	-999	110
IN_OCTOT	HC2	CO2	-999	110
IN_OCTOT	HF	CO2	-999	260
IN_OCTOT	LPG	CO2	-999	220
IN_OCTOT	MD	CO2	-999	250
IN_OCTOT	WSFNR	CO2	-999	500
IND_FOOD_NOC	NOF	CH4	7520	0
IND_FOOD_TRM	NOF	CH4	7520	0
IND_OCH_TRM	NOF	CH4	7520	0
IND_OS	EMI	VOC	2717	0
IND_OTH	EMI	VOC	2820	0
IND_P_CNT	PNT	VOC	2712	0
IND_P_OT	PNT	VOC	2712	0
IND_P_PL	PNT	VOC	2712	0
IND_PAP_NOC	NOF	CH4	7520	0
IND_PAP_TRM	NOF	CH4	7520	0
INORG	EMI	VOC	2320	0
INW_FOOD	10YR_BP	CH4	7100	0
INW_FOOD	NOF	CH4	7100	0
INW_PAP	20YR_BP	CH4	7100	0
INW_PAP	NOF	CH4	7100	0
INW_TEX	20YR_BP	CH4	7100	0
INW_TEX	NOF	CH4	7100	0
INW_WOOD	20YR_BP	CH4	7100	0
INW_WOOD	NOF	CH4	7100	0
IO_NH3_EMISS	NOF	NH3	2820	0
LEAD_GASOL	LFL	PM10	3100	210
LEAD_GASOL	LFL	PM2_5	3100	210
LEAD_GASOL	LFL	TSP	3100	210
LEATHER	CTG	VOC	2712	0
MANURE	DL	N2O	6320	0
MANURE	DS	N2O	6320	0
MANURE	FU	N2O	6320	0
MANURE	HO	N2O	6320	0
MANURE	LH	N2O	6320	0
MANURE	OL	N2O	6320	0
MANURE	OP	N2O	6320	0
MANURE	OS	N2O	6320	0
MANURE	PL	N2O	6320	0
MANURE	PS	N2O	6320	0
MANURE	SH	N2O	6320	0
MINE_BC	NOF	PM10	1410	0
MINE_BC	NOF	PM2_5	1410	0
MINE_BC	NOF	TSP	1410	0
MINE_BC_POST	NOF	CH4	1410	0
MINE_BC_PRE	NOF	CH4	1410	0
MINE_BC_VAM	NOF	CH4	1410	0
MINE_HC	NOF	PM10	1410	0
MINE_HC	NOF	PM2_5	1410	0
MINE_HC	NOF	TSP	1410	0
MINE_HC_POST	NOF	CH4	1410	0
MINE_HC_PRE	NOF	CH4	1410	0
MINE_HC_VAM	NOF	CH4	1410	0
MINE_OTH	NOF	PM10	2630	0
MINE_OTH	NOF	PM2_5	2630	0
MINE_OTH	NOF	TSP	2630	0
MSW_FOOD	10YR_BP	CH4	7100	0
MSW_FOOD	NOF	CH4	7100	0
MSW_FOOD	NOF	CO	7100	0
MSW_FOOD	NOF	NOx	7100	0
MSW_FOOD	NOF	PM10	7100	0
MSW_FOOD	NOF	PM2_5	7100	0
MSW_FOOD	NOF	SO2	7100	0
MSW_FOOD	NOF	TSP	7100	0
MSW_FOOD	NOF	VOC	7100	0
MSW_OTH	20YR_BP	CH4	7100	0
MSW_OTH	NOF	CH4	7100	0
MSW_OTH	NOF	CO	7100	0
MSW_OTH	NOF	NOx	7100	0
MSW_OTH	NOF	PM10	7100	0
MSW_OTH	NOF	PM2_5	7100	0
MSW_OTH	NOF	SO2	7100	0
MSW_OTH	NOF	TSP	7100	0
MSW_OTH	NOF	VOC	7100	0
MSW_PAP	20YR_BP	CH4	7100	0
MSW_PAP	NOF	CH4	7100	0
MSW_PAP	NOF	CO	7100	0
MSW_PAP	NOF	NOx	7100	0
MSW_PAP	NOF	PM10	7100	0
MSW_PAP	NOF	PM2_5	7100	0
MSW_PAP	NOF	SO2	7100	0
MSW_PAP	NOF	TSP	7100	0
MSW_PAP	NOF	VOC	7100	0
MSW_PLA	NOF	CO	7100	0
MSW_PLA	NOF	NOx	7100	0
MSW_PLA	NOF	PM10	7100	0
MSW_PLA	NOF	PM2_5	7100	0
MSW_PLA	NOF	SO2	7100	0
MSW_PLA	NOF	TSP	7100	0
MSW_PLA	NOF	VOC	7100	0
MSW_TEX	20YR_BP	CH4	7100	0
MSW_TEX	NOF	CH4	7100	0
MSW_TEX	NOF	CO	7100	0
MSW_TEX	NOF	NOx	7100	0
MSW_TEX	NOF	PM10	7100	0
MSW_TEX	NOF	PM2_5	7100	0
MSW_TEX	NOF	SO2	7100	0
MSW_TEX	NOF	TSP	7100	0
MSW_TEX	NOF	VOC	7100	0
MSW_WOOD	20YR_BP	CH4	7100	0
MSW_WOOD	NOF	CH4	7100	0
MSW_WOOD	NOF	CO	7100	0
MSW_WOOD	NOF	NOx	7100	0
MSW_WOOD	NOF	PM10	7100	0
MSW_WOOD	NOF	PM2_5	7100	0
MSW_WOOD	NOF	SO2	7100	0
MSW_WOOD	NOF	TSP	7100	0
MSW_WOOD	NOF	VOC	7100	0
N2O_USE	POP	N2O	2724	0
ORG_STORE	EMI	VOC	2320	0
OTH_NH3_EMISS	NOF	NH3	6560	0
OTH_ORG_PR	EMI	VOC	2320	0
PHARMA	SLV	VOC	2715	0
PIS	PG	VOC	2717	0
PLSTYR_PR	EPS	VOC	2717	0
PP_ENG	GAS	CH4	1100	300
PP_ENG	GAS	CO	1100	300
PP_ENG	GAS	NH3	1100	300
PP_ENG	GAS	NOX	1100	300
PP_ENG	GAS	PM10	1100	300
PP_ENG	GAS	PM2_5	1100	300
PP_ENG	GAS	SO2	1100	300
PP_ENG	GAS	TSP	1100	300
PP_ENG	GAS	VOC	1100	300
PP_ENG	GAS_M	CO2	1100	300
PP_ENG	HF	CH4	1100	260
PP_ENG	HF	CO	1100	260
PP_ENG	HF	CO2	1100	260
PP_ENG	HF	NH3	1100	260
PP_ENG	HF	NOX	1100	260
PP_ENG	HF	PM10	1100	260
PP_ENG	HF	PM2_5	1100	260
PP_ENG	HF	SO2	1100	260
PP_ENG	HF	TSP	1100	260
PP_ENG	HF	VOC	1100	260
PP_ENG	MD	CH4	1100	250
PP_ENG	MD	CO	1100	250
PP_ENG	MD	N2O	1100	250
PP_ENG	MD	NH3	1100	250
PP_ENG	MD	NOX	1100	250
PP_ENG	MD	PM10	1100	250
PP_ENG	MD	PM2_5	1100	250
PP_ENG	MD	SO2	1100	250
PP_ENG	MD	TSP	1100	250
PP_ENG	MD	VOC	1100	250
PP_ENG	MD_M	CO2	1100	250
PP_EX_L	BC1	CH4	1100	130
PP_EX_L	BC1	CO	1100	130
PP_EX_L	BC1	CO2	1100	130
PP_EX_L	BC1	N2O	1100	130
PP_EX_L	BC1	NH3	1100	130
PP_EX_L	BC1	NOX	1100	130
PP_EX_L	BC1	PM10	1100	130
PP_EX_L	BC1	PM2_5	1100	130
PP_EX_L	BC1	SO2	1100	130
PP_EX_L	BC1	TSP	1100	130
PP_EX_L	BC1	VOC	1100	130
PP_EX_L	BC2	CH4	1100	130
PP_EX_L	BC2	CO	1100	130
PP_EX_L	BC2	CO2	1100	130
PP_EX_L	BC2	N2O	1100	130
PP_EX_L	BC2	NH3	1100	130
PP_EX_L	BC2	NOX	1100	130
PP_EX_L	BC2	PM10	1100	130
PP_EX_L	BC2	PM2_5	1100	130
PP_EX_L	BC2	SO2	1100	130
PP_EX_L	BC2	TSP	1100	130
PP_EX_L	BC2	VOC	1100	130
PP_EX_L	HC1	CH4	1100	110
PP_EX_L	HC1	CO	1100	110
PP_EX_L	HC1	CO2	1100	110
PP_EX_L	HC1	N2O	1100	110
PP_EX_L	HC1	NH3	1100	110
PP_EX_L	HC1	NOX	1100	110
PP_EX_L	HC1	PM10	1100	110
PP_EX_L	HC1	PM2_5	1100	110
PP_EX_L	HC1	SO2	1100	110
PP_EX_L	HC1	TSP	1100	110
PP_EX_L	HC1	VOC	1100	110
PP_EX_L	HC2	CH4	1100	110
PP_EX_L	HC2	CO	1100	110
PP_EX_L	HC2	CO2	1100	110
PP_EX_L	HC2	N2O	1100	110
PP_EX_L	HC2	NH3	1100	110
PP_EX_L	HC2	NOX	1100	110
PP_EX_L	HC2	PM10	1100	110
PP_EX_L	HC2	PM2_5	1100	110
PP_EX_L	HC2	SO2	1100	110
PP_EX_L	HC2	TSP	1100	110
PP_EX_L	HC2	VOC	1100	110
PP_EX_L	HC3	CH4	1100	110
PP_EX_L	HC3	CO	1100	110
PP_EX_L	HC3	CO2	1100	110
PP_EX_L	HC3	N2O	1100	110
PP_EX_L	HC3	NH3	1100	110
PP_EX_L	HC3	NOX	1100	110
PP_EX_L	HC3	PM10	1100	110
PP_EX_L	HC3	PM2_5	1100	110
PP_EX_L	HC3	SO2	1100	110
PP_EX_L	HC3	TSP	1100	110
PP_EX_L	HC3	VOC	1100	110
PP_EX_OTH	DC	CH4	1100	120
PP_EX_OTH	DC	CO	1100	120
PP_EX_OTH	DC	CO2	1100	120
PP_EX_OTH	DC	N2O	1100	120
PP_EX_OTH	DC	NH3	1100	120
PP_EX_OTH	DC	NOX	1100	120
PP_EX_OTH	DC	PM10	1100	120
PP_EX_OTH	DC	PM2_5	1100	120
PP_EX_OTH	DC	SO2	1100	120
PP_EX_OTH	DC	TSP	1100	120
PP_EX_OTH	DC	VOC	1100	120
PP_EX_OTH	GAS	CH4	1100	300
PP_EX_OTH	GAS	CO	1100	300
PP_EX_OTH	GAS	CO2	1100	300
PP_EX_OTH	GAS	N2O	1100	300
PP_EX_OTH	GAS	NH3	1100	300
PP_EX_OTH	GAS	NOX	1100	300
PP_EX_OTH	GAS	PM10	1100	300
PP_EX_OTH	GAS	PM2_5	1100	300
PP_EX_OTH	GAS	SO2	1100	300
PP_EX_OTH	GAS	TSP	1100	300
PP_EX_OTH	GAS	VOC	1100	300
PP_EX_OTH	GSL	CH4	1100	230
PP_EX_OTH	GSL	CO	1100	230
PP_EX_OTH	GSL	CO2	1100	230
PP_EX_OTH	GSL	N2O	1100	230
PP_EX_OTH	GSL	NH3	1100	230
PP_EX_OTH	GSL	NOX	1100	230
PP_EX_OTH	GSL	PM10	1100	230
PP_EX_OTH	GSL	PM2_5	1100	230
PP_EX_OTH	GSL	SO2	1100	230
PP_EX_OTH	GSL	TSP	1100	230
PP_EX_OTH	GSL	VOC	1100	230
PP_EX_OTH	HF	CH4	1100	260
PP_EX_OTH	HF	CO	1100	260
PP_EX_OTH	HF	CO2	1100	260
PP_EX_OTH	HF	N2O	1100	260
PP_EX_OTH	HF	NH3	1100	260
PP_EX_OTH	HF	NOX	1100	260
PP_EX_OTH	HF	PM10	1100	260
PP_EX_OTH	HF	PM2_5	1100	260
PP_EX_OTH	HF	SO2	1100	260
PP_EX_OTH	HF	TSP	1100	260
PP_EX_OTH	HF	VOC	1100	260
PP_EX_OTH	MD	CH4	1100	250
PP_EX_OTH	MD	CO	1100	250
PP_EX_OTH	MD	CO2	1100	250
PP_EX_OTH	MD	N2O	1100	250
PP_EX_OTH	MD	NH3	1100	250
PP_EX_OTH	MD	NOX	1100	250
PP_EX_OTH	MD	PM10	1100	250
PP_EX_OTH	MD	PM2_5	1100	250
PP_EX_OTH	MD	SO2	1100	250
PP_EX_OTH	MD	TSP	1100	250
PP_EX_OTH	MD	VOC	1100	250
PP_EX_OTH	OS1	CH4	1100	400
PP_EX_OTH	OS1	CO	1100	400
PP_EX_OTH	OS1	CO2	1100	400
PP_EX_OTH	OS1	CO2_BIO	1100	400
PP_EX_OTH	OS1	N2O	1100	400
PP_EX_OTH	OS1	NH3	1100	400
PP_EX_OTH	OS1	NOX	1100	400
PP_EX_OTH	OS1	PM10	1100	400
PP_EX_OTH	OS1	PM2_5	1100	400
PP_EX_OTH	OS1	SO2	1100	400
PP_EX_OTH	OS1	TSP	1100	400
PP_EX_OTH	OS1	VOC	1100	400
PP_EX_OTH	OS2	CH4	1100	500
PP_EX_OTH	OS2	CO	1100	500
PP_EX_OTH	OS2	N2O	1100	500
PP_EX_OTH	OS2	NH3	1100	500
PP_EX_OTH	OS2	NOX	1100	500
PP_EX_OTH	OS2	PM10	1100	500
PP_EX_OTH	OS2	PM2_5	1100	500
PP_EX_OTH	OS2	SO2	1100	500
PP_EX_OTH	OS2	TSP	1100	500
PP_EX_OTH	OS2	VOC	1100	500
PP_EX_OTH	WSFNR	CO2	1100	500
PP_EX_S	BC1	CH4	1100	130
PP_EX_S	BC1	CO	1100	130
PP_EX_S	BC1	CO2	1100	130
PP_EX_S	BC1	N2O	1100	130
PP_EX_S	BC1	NH3	1100	130
PP_EX_S	BC1	NOX	1100	130
PP_EX_S	BC1	PM10	1100	130
PP_EX_S	BC1	PM2_5	1100	130
PP_EX_S	BC1	SO2	1100	130
PP_EX_S	BC1	TSP	1100	130
PP_EX_S	BC1	VOC	1100	130
PP_EX_S	BC2	CH4	1100	130
PP_EX_S	BC2	CO	1100	130
PP_EX_S	BC2	CO2	1100	130
PP_EX_S	BC2	N2O	1100	130
PP_EX_S	BC2	NH3	1100	130
PP_EX_S	BC2	NOX	1100	130
PP_EX_S	BC2	PM10	1100	130
PP_EX_S	BC2	PM2_5	1100	130
PP_EX_S	BC2	SO2	1100	130
PP_EX_S	BC2	TSP	1100	130
PP_EX_S	BC2	VOC	1100	130
PP_EX_S	HC1	CH4	1100	110
PP_EX_S	HC1	CO	1100	110
PP_EX_S	HC1	CO2	1100	110
PP_EX_S	HC1	N2O	1100	110
PP_EX_S	HC1	NH3	1100	110
PP_EX_S	HC1	NOX	1100	110
PP_EX_S	HC1	PM10	1100	110
PP_EX_S	HC1	PM2_5	1100	110
PP_EX_S	HC1	SO2	1100	110
PP_EX_S	HC1	TSP	1100	110
PP_EX_S	HC1	VOC	1100	110
PP_EX_S	HC2	CH4	1100	110
PP_EX_S	HC2	CO	1100	110
PP_EX_S	HC2	CO2	1100	110
PP_EX_S	HC2	N2O	1100	110
PP_EX_S	HC2	NH3	1100	110
PP_EX_S	HC2	NOX	1100	110
PP_EX_S	HC2	PM10	1100	110
PP_EX_S	HC2	PM2_5	1100	110
PP_EX_S	HC2	SO2	1100	110
PP_EX_S	HC2	TSP	1100	110
PP_EX_S	HC2	VOC	1100	110
PP_EX_S	HC3	CH4	1100	110
PP_EX_S	HC3	CO	1100	110
PP_EX_S	HC3	CO2	1100	110
PP_EX_S	HC3	N2O	1100	110
PP_EX_S	HC3	NH3	1100	110
PP_EX_S	HC3	NOX	1100	110
PP_EX_S	HC3	PM10	1100	110
PP_EX_S	HC3	PM2_5	1100	110
PP_EX_S	HC3	SO2	1100	110
PP_EX_S	HC3	VOC	1100	110
PP_IGCC	BC1	CO	1100	130
PP_IGCC	BC1	CO2	1100	130
PP_IGCC	BC1	N2O	1100	130
PP_IGCC	BC1	NH3	1100	130
PP_IGCC	BC1	NOX	1100	130
PP_IGCC	BC1	PM10	1100	130
PP_IGCC	BC1	PM2_5	1100	130
PP_IGCC	BC1	SO2	1100	130
PP_IGCC	BC1	VOC	1100	130
PP_IGCC	BC2	CO	1100	130
PP_IGCC	BC2	CO2	1100	130
PP_IGCC	BC2	N2O	1100	130
PP_IGCC	BC2	NH3	1100	130
PP_IGCC	BC2	NOX	1100	130
PP_IGCC	BC2	PM10	1100	130
PP_IGCC	BC2	PM2_5	1100	130
PP_IGCC	BC2	SO2	1100	130
PP_IGCC	BC2	VOC	1100	130
PP_IGCC	FWD	CO2	1100	410
PP_IGCC	HC1	CO	1100	110
PP_IGCC	HC1	CO2	1100	110
PP_IGCC	HC1	N2O	1100	110
PP_IGCC	HC1	NH3	1100	110
PP_IGCC	HC1	NOX	1100	110
PP_IGCC	HC1	PM10	1100	110
PP_IGCC	HC1	PM2_5	1100	110
PP_IGCC	HC1	SO2	1100	110
PP_IGCC	HC1	TSP	1100	110
PP_IGCC	HC1	VOC	1100	110
PP_IGCC	HC2	CO	1100	110
PP_IGCC	HC2	CO2	1100	110
PP_IGCC	HC2	N2O	1100	110
PP_IGCC	HC2	NH3	1100	110
PP_IGCC	HC2	NOX	1100	110
PP_IGCC	HC2	PM10	1100	110
PP_IGCC	HC2	PM2_5	1100	110
PP_IGCC	HC2	SO2	1100	110
PP_IGCC	HC2	VOC	1100	110
PP_IGCC	HC3	CO	1100	110
PP_IGCC	HC3	CO2	1100	110
PP_IGCC	HC3	N2O	1100	110
PP_IGCC	HC3	NH3	1100	110
PP_IGCC	HC3	NOX	1100	110
PP_IGCC	HC3	PM10	1100	110
PP_IGCC	HC3	PM2_5	1100	110
PP_IGCC	HC3	SO2	1100	110
PP_IGCC	HC3	VOC	1100	110
PP_IGCC	OS1	CO	1100	400
PP_IGCC	OS1	CO2	1100	400
PP_IGCC	OS1	CO2_BIO	1100	400
PP_IGCC	OS1	N2O	1100	400
PP_IGCC	OS1	NH3	1100	400
PP_IGCC	OS1	NOX	1100	400
PP_IGCC	OS1	PM10	1100	400
PP_IGCC	OS1	PM2_5	1100	400
PP_IGCC	OS1	SO2	1100	400
PP_IGCC	OS1	TSP	1100	400
PP_IGCC	OS1	VOC	1100	400
PP_IGCC	OS2	CO	1100	500
PP_IGCC	OS2	N2O	1100	500
PP_IGCC	OS2	NH3	1100	500
PP_IGCC	OS2	NOX	1100	500
PP_IGCC	OS2	PM10	1100	500
PP_IGCC	OS2	PM2_5	1100	500
PP_IGCC	OS2	SO2	1100	500
PP_IGCC	OS2	TSP	1100	500
PP_IGCC	OS2	VOC	1100	500
PP_IGCC	WSFNR	CO2	1100	500
PP_IGCC	WSFR	CO2	1100	450
PP_IGCC_CCS	HC1	CO	1100	110
PP_IGCC_CCS	HC1	CO2	1100	110
PP_IGCC_CCS	HC1	N2O	1100	110
PP_IGCC_CCS	HC1	NH3	1100	110
PP_IGCC_CCS	HC1	NOX	1100	110
PP_IGCC_CCS	HC1	PM10	1100	110
PP_IGCC_CCS	HC1	PM2_5	1100	110
PP_IGCC_CCS	HC1	SO2	1100	110
PP_IGCC_CCS	HC1	VOC	1100	110
PP_MOD	BC1	CH4	1100	130
PP_MOD	BC1	CO	1100	130
PP_MOD	BC1	CO2	1100	130
PP_MOD	BC1	N2O	1100	130
PP_MOD	BC1	NOx	1100	130
PP_MOD	BC1	PM10	1100	130
PP_MOD	BC1	PM2_5	1100	130
PP_MOD	BC1	SO2	1100	130
PP_MOD	BC1	TSP	1100	130
PP_MOD	BC1	VOC	1100	130
PP_MOD	GAS	CH4	1100	300
PP_MOD	GAS	CO	1100	300
PP_MOD	GAS	CO2	1100	300
PP_MOD	GAS	N2O	1100	300
PP_MOD	GAS	NH3	1100	300
PP_MOD	GAS	NOX	1100	300
PP_MOD	GAS	PM10	1100	300
PP_MOD	GAS	PM2_5	1100	300
PP_MOD	GAS	SO2	1100	300
PP_MOD	GAS	TSP	1100	300
PP_MOD	GAS	VOC	1100	300
PP_MOD	HC1	CH4	1100	110
PP_MOD	HC1	CO	1100	110
PP_MOD	HC1	CO2	1100	110
PP_MOD	HC1	N2O	1100	110
PP_MOD	HC1	NH3	1100	110
PP_MOD	HC1	NOx	1100	110
PP_MOD	HC1	PM10	1100	110
PP_MOD	HC1	PM2_5	1100	110
PP_MOD	HC1	SO2	1100	110
PP_MOD	HC1	TSP	1100	110
PP_MOD	HC1	VOC	1100	110
PP_MOD_CCS	BC1	CH4	1100	130
PP_MOD_CCS	BC2	CH4	1100	130
PP_MOD_CCS	GAS	CH4	1100	300
PP_MOD_CCS	GAS	CO	1100	300
PP_MOD_CCS	GAS	N2O	1100	300
PP_MOD_CCS	GAS	NOx	1100	300
PP_MOD_CCS	GAS	PM10	1100	300
PP_MOD_CCS	GAS	PM2_5	1100	300
PP_MOD_CCS	GAS	TSP	1100	300
PP_MOD_CCS	GAS	VOC	1100	300
PP_MOD_CCS	HC1	CH4	1100	110
PP_MOD_CCS	HC1	CO	1100	110
PP_MOD_CCS	HC1	CO2	1100	110
PP_MOD_CCS	HC1	N2O	1100	110
PP_MOD_CCS	HC1	NOx	1100	110
PP_MOD_CCS	HC1	PM10	1100	110
PP_MOD_CCS	HC1	PM2_5	1100	110
PP_MOD_CCS	HC1	SO2	1100	110
PP_MOD_CCS	HC1	TSP	1100	110
PP_MOD_CCS	HC1	VOC	1100	110
PP_MOD_CCS	HC2	CH4	1100	110
PP_NEW	BLIQ	CO2	1100	460
PP_NEW	DC	CH4	1100	120
PP_NEW	DC	CO	1100	120
PP_NEW	DC	CO2	1100	120
PP_NEW	DC	N2O	1100	120
PP_NEW	DC	NH3	1100	120
PP_NEW	DC	NOX	1100	120
PP_NEW	DC	PM10	1100	120
PP_NEW	DC	PM2_5	1100	120
PP_NEW	DC	SO2	1100	120
PP_NEW	DC	TSP	1100	120
PP_NEW	DC	VOC	1100	120
PP_NEW	FWD	CO2	1100	410
PP_NEW	GAS	CH4	1100	300
PP_NEW	GAS	CO	1100	300
PP_NEW	GAS	CO2	1100	300
PP_NEW	GAS	N2O	1100	300
PP_NEW	GAS	NH3	1100	300
PP_NEW	GAS	NOX	1100	300
PP_NEW	GAS	PM10	1100	300
PP_NEW	GAS	PM2_5	1100	300
PP_NEW	GAS	SO2	1100	300
PP_NEW	GAS	TSP	1100	300
PP_NEW	GAS	VOC	1100	300
PP_NEW	GSL	CH4	1100	230
PP_NEW	GSL	CO	1100	230
PP_NEW	GSL	CO2	1100	230
PP_NEW	GSL	N2O	1100	230
PP_NEW	GSL	NH3	1100	230
PP_NEW	GSL	NOX	1100	230
PP_NEW	GSL	PM10	1100	230
PP_NEW	GSL	PM2_5	1100	230
PP_NEW	GSL	SO2	1100	230
PP_NEW	GSL	TSP	1100	230
PP_NEW	GSL	VOC	1100	230
PP_NEW	HF	CH4	1100	260
PP_NEW	HF	CO	1100	260
PP_NEW	HF	CO2	1100	260
PP_NEW	HF	N2O	1100	260
PP_NEW	HF	NH3	1100	260
PP_NEW	HF	NOX	1100	260
PP_NEW	HF	PM10	1100	260
PP_NEW	HF	PM2_5	1100	260
PP_NEW	HF	SO2	1100	260
PP_NEW	HF	TSP	1100	260
PP_NEW	HF	VOC	1100	260
PP_NEW	MD	CH4	1100	250
PP_NEW	MD	CO	1100	250
PP_NEW	MD	CO2	1100	250
PP_NEW	MD	N2O	1100	250
PP_NEW	MD	NH3	1100	250
PP_NEW	MD	NOX	1100	250
PP_NEW	MD	PM10	1100	250
PP_NEW	MD	PM2_5	1100	250
PP_NEW	MD	SO2	1100	250
PP_NEW	MD	TSP	1100	250
PP_NEW	MD	VOC	1100	250
PP_NEW	OS1	CH4	1100	400
PP_NEW	OS1	CO	1100	400
PP_NEW	OS1	CO2	1100	400
PP_NEW	OS1	CO2_BIO	1100	400
PP_NEW	OS1	N2O	1100	400
PP_NEW	OS1	NH3	1100	400
PP_NEW	OS1	NOX	1100	400
PP_NEW	OS1	PM10	1100	400
PP_NEW	OS1	PM2_5	1100	400
PP_NEW	OS1	SO2	1100	400
PP_NEW	OS1	TSP	1100	400
PP_NEW	OS1	VOC	1100	400
PP_NEW	OS2	CH4	1100	500
PP_NEW	OS2	CO	1100	500
PP_NEW	OS2	N2O	1100	500
PP_NEW	OS2	NH3	1100	500
PP_NEW	OS2	NOX	1100	500
PP_NEW	OS2	PM10	1100	500
PP_NEW	OS2	PM2_5	1100	500
PP_NEW	OS2	SO2	1100	500
PP_NEW	OS2	TSP	1100	500
PP_NEW	OS2	VOC	1100	500
PP_NEW	WSFNR	CO2	1100	500
PP_NEW	WSFR	CO2	1100	450
PP_NEW_L	BC1	CH4	1100	130
PP_NEW_L	BC1	CO	1100	130
PP_NEW_L	BC1	CO2	1100	130
PP_NEW_L	BC1	N2O	1100	130
PP_NEW_L	BC1	NH3	1100	130
PP_NEW_L	BC1	NOX	1100	130
PP_NEW_L	BC1	PM10	1100	130
PP_NEW_L	BC1	PM2_5	1100	130
PP_NEW_L	BC1	SO2	1100	130
PP_NEW_L	BC1	TSP	1100	130
PP_NEW_L	BC1	VOC	1100	130
PP_NEW_L	BC2	CH4	1100	130
PP_NEW_L	BC2	CO	1100	130
PP_NEW_L	BC2	CO2	1100	130
PP_NEW_L	BC2	N2O	1100	130
PP_NEW_L	BC2	NH3	1100	130
PP_NEW_L	BC2	NOX	1100	130
PP_NEW_L	BC2	PM10	1100	130
PP_NEW_L	BC2	PM2_5	1100	130
PP_NEW_L	BC2	SO2	1100	130
PP_NEW_L	BC2	TSP	1100	130
PP_NEW_L	BC2	VOC	1100	130
PP_NEW_L	HC1	CH4	1100	110
PP_NEW_L	HC1	CO	1100	110
PP_NEW_L	HC1	CO2	1100	110
PP_NEW_L	HC1	N2O	1100	110
PP_NEW_L	HC1	NH3	1100	110
PP_NEW_L	HC1	NOX	1100	110
PP_NEW_L	HC1	PM10	1100	110
PP_NEW_L	HC1	PM2_5	1100	110
PP_NEW_L	HC1	SO2	1100	110
PP_NEW_L	HC1	TSP	1100	110
PP_NEW_L	HC1	VOC	1100	110
PP_NEW_L	HC2	CH4	1100	110
PP_NEW_L	HC2	CO	1100	110
PP_NEW_L	HC2	CO2	1100	110
PP_NEW_L	HC2	N2O	1100	110
PP_NEW_L	HC2	NH3	1100	110
PP_NEW_L	HC2	NOX	1100	110
PP_NEW_L	HC2	PM10	1100	110
PP_NEW_L	HC2	PM2_5	1100	110
PP_NEW_L	HC2	SO2	1100	110
PP_NEW_L	HC2	TSP	1100	110
PP_NEW_L	HC2	VOC	1100	110
PP_TOTAL	REN	NOX	1100	460
PP_TOTAL	REN	SO2	1100	460
PR_ADIP	NOF	N2O	2320	0
PR_ALPRIM	NOF	CO	2220	0
PR_ALPRIM	NOF	PM10	2220	0
PR_ALPRIM	NOF	PM2_5	2220	0
PR_ALPRIM	NOF	TSP	2220	0
PR_ALSEC	NOF	PM10	2220	0
PR_ALSEC	NOF	PM2_5	2220	0
PR_ALSEC	NOF	TSP	2220	0
PR_BAOX	NOF	CO	2120	0
PR_BAOX	NOF	PM10	2120	0
PR_BAOX	NOF	PM2_5	2120	0
PR_BAOX	NOF	TSP	2120	0
PR_BRICK	NOF	CH4	2630	0
PR_BRICK	NOF	CO	2630	0
PR_BRICK	NOF	CO2	2630	0
PR_BRICK	NOF	N2O	2630	0
PR_BRICK	NOF	NOX	2630	0
PR_BRICK	NOF	PM10	2630	0
PR_BRICK	NOF	PM2_5	2630	0
PR_BRICK	NOF	SO2	2630	0
PR_BRICK	NOF	TSP	2630	0
PR_BRICK	NOF	VOC	2630	0
PR_BRIQ	NOF	CO	2630	0
PR_BRIQ	NOF	PM10	2630	0
PR_BRIQ	NOF	PM2_5	2630	0
PR_BRIQ	NOF	TSP	2630	0
PR_CAPR	NOF	N2O	2630	0
PR_CAST	NOF	CO	2630	0
PR_CAST	NOF	PM10	2120	0
PR_CAST	NOF	PM2_5	2120	0
PR_CAST	NOF	TSP	2120	0
PR_CAST_F	NOF	PM10	2120	0
PR_CAST_F	NOF	PM2_5	2120	0
PR_CAST_F	NOF	TSP	2120	0
PR_CBLACK	NOF	CO	2320	0
PR_CBLACK	NOF	PM10	2320	0
PR_CBLACK	NOF	PM2_5	2320	0
PR_CBLACK	NOF	TSP	2320	0
PR_CEM	NOF	CO	2620	0
PR_CEM	NOF	CO2	2620	0
PR_CEM	NOF	NOX	2620	0
PR_CEM	NOF	PM10	2620	0
PR_CEM	NOF	PM2_5	2620	0
PR_CEM	NOF	SO2	2620	0
PR_CEM	NOF	TSP	2620	0
PR_COKE	NOF	CO	1420	0
PR_COKE	NOF	NOX	1420	0
PR_COKE	NOF	PM10	1420	0
PR_COKE	NOF	PM2_5	1420	0
PR_COKE	NOF	SO2	1420	0
PR_COKE	NOF	TSP	1420	0
PR_CSP	NOF	PM10	2320	0
PR_CSP	NOF	PM2_5	2320	0
PR_EARC	NOF	CO	2120	0
PR_EARC	NOF	PM10	2120	0
PR_EARC	NOF	PM2_5	2120	0
PR_EARC	NOF	TSP	2120	0
PR_FERT	NOF	CO	2320	0
PR_FERT	NOF	PM10	2320	0
PR_FERT	NOF	PM2_5	2320	0
PR_FERT	NOF	TSP	2320	0
PR_GLASS	NOF	CO	2630	0
PR_GLASS	NOF	NOX	2630	0
PR_GLASS	NOF	PM10	2630	0
PR_GLASS	NOF	PM2_5	2630	0
PR_GLASS	NOF	SO2	2630	0
PR_GLASS	NOF	TSP	2630	0
PR_HEARTH	NOF	CO	2120	0
PR_HEARTH	NOF	PM10	2120	0
PR_HEARTH	NOF	PM2_5	2120	0
PR_HEARTH	NOF	TSP	2120	0
PR_LIME	NOF	CO	2630	0
PR_LIME	NOF	CO2	2630	0
PR_LIME	NOF	NOX	2630	0
PR_LIME	NOF	PM10	2630	0
PR_LIME	NOF	PM2_5	2630	0
PR_LIME	NOF	SO2	2630	0
PR_LIME	NOF	TSP	2630	0
PR_NIAC	NOF	N2O	2320	0
PR_NIAC	NOF	NOX	2320	0
PR_NIAC	NOF	SO2	2320	0
PR_OT_NFME	NOF	CO	2230	0
PR_OT_NFME	NOF	NOX	2230	0
PR_OT_NFME	NOF	PM10	2230	0
PR_OT_NFME	NOF	PM2_5	2230	0
PR_OT_NFME	NOF	SO2	2230	0
PR_OT_NFME	NOF	TSP	2230	0
PR_OTHER	NOF	CO	2820	0
PR_OTHER	NOF	PM10	2820	0
PR_OTHER	NOF	PM2_5	2820	0
PR_OTHER	NOF	TSP	2820	0
PR_PELL	NOF	CO	2120	0
PR_PELL	NOF	PM10	2120	0
PR_PELL	NOF	PM2_5	2120	0
PR_PELL	NOF	TSP	2120	0
PR_PIGI	NOF	CO	2120	0
PR_PIGI	NOF	NOX	2120	0
PR_PIGI	NOF	PM10	2120	0
PR_PIGI	NOF	PM2_5	2120	0
PR_PIGI	NOF	SO2	2120	0
PR_PIGI	NOF	TSP	2120	0
PR_PIGI_F	NOF	PM10	2120	0
PR_PIGI_F	NOF	PM2_5	2120	0
PR_PIGI_F	NOF	TSP	2120	0
PR_PULP	NOF	CO	2420	0
PR_PULP	NOF	NOX	2420	0
PR_PULP	NOF	PM10	2420	0
PR_PULP	NOF	PM2_5	2420	0
PR_PULP	NOF	SO2	2420	0
PR_PULP	NOF	TSP	2420	0
PR_REF	CRU	VOC	1220	0
PR_REF	NOF	CH4	1220	0
PR_REF	NOF	CO	1220	0
PR_REF	NOF	NOX	1220	0
PR_REF	NOF	PM10	1220	0
PR_REF	NOF	PM2_5	1220	0
PR_REF	NOF	SO2	1220	0
PR_REF	NOF	TSP	1220	0
PR_SINT	NOF	CO	2120	0
PR_SINT	NOF	NOX	2120	0
PR_SINT	NOF	PM10	2120	0
PR_SINT	NOF	PM2_5	2120	0
PR_SINT	NOF	SO2	2120	0
PR_SINT	NOF	TSP	2120	0
PR_SINT_F	NOF	PM10	2120	0
PR_SINT_F	NOF	PM2_5	2120	0
PR_SINT_F	NOF	TSP	2120	0
PR_SMIND_F	NOF	PM10	2820	0
PR_SMIND_F	NOF	PM2_5	2820	0
PR_SMIND_F	NOF	TSP	2820	0
PR_SUAC	NOF	NOX	2320	0
PR_SUAC	NOF	SO2	2320	0
PROD_AGAS	CRU	CH4	1510	0
PROD_AGAS	CRU	CO	1510	0
PROD_AGAS	CRU	CO2	1510	0
PROD_AGAS	CRU	NH3	1510	0
PROD_AGAS	CRU	NOx	1510	0
PROD_AGAS	CRU	PM10	1510	0
PROD_AGAS	CRU	PM2_5	1510	0
PROD_AGAS	CRU	SO2	1510	0
PROD_AGAS	CRU	TSP	1510	0
PROD_AGAS	CRU	VOC	1510	0
PROD_AGAS	GAS	CH4	1610	0
PROD_LEAK	CB_GAS	CH4	1610	0
PROD_LEAK	CRU	CH4	1510	0
PROD_LEAK	GAS	CH4	1610	0
PROD_LEAK	T_GAS	CH4	1610	0
PRT_OFFS	INK	VOC	2716	0
PRT_OFFS_NEW	INK	VOC	2716	0
PRT_PACK	INK	VOC	2716	0
PRT_PACK_NEW	INK	VOC	2716	0
PRT_PUB	INK	VOC	2716	0
PRT_PUB_NEW	INK	VOC	2716	0
PRT_SCR	INK	VOC	2716	0
PRT_SCR_NEW	INK	VOC	2716	0
PVC_PR	PVC	VOC	2717	0
RES_BBQ	NOF	CO	7610	0
RES_BBQ	NOF	PM10	7610	0
RES_BBQ	NOF	PM2_5	7610	0
RES_BBQ	NOF	TSP	7610	0
RES_CIGAR	NOF	CO	7610	0
RES_CIGAR	NOF	PM10	7610	0
RES_CIGAR	NOF	PM2_5	7610	0
RES_CIGAR	NOF	TSP	7610	0
RES_CREM	NOF	PM10	7360	0
RES_CREM	NOF	PM2_5	7360	0
RES_FIREW	NOF	CO	7620	0
RES_FIREW	NOF	PM10	7620	0
RES_FIREW	NOF	PM2_5	7620	0
RES_FIREW	NOF	TSP	7620	0
RICE_FLOOD	AREA	CH4	6510	0
SHOE	SHO	VOC	2724	0
STCRACK_PR	EP	VOC	2715	0
STH_AGR	NOF	PM10	6430	0
STH_AGR	NOF	PM2_5	6430	0
STH_AGR	NOF	TSP	6430	0
STH_COAL	NOF	PM10	1410	0
STH_COAL	NOF	PM2_5	1410	0
STH_COAL	NOF	TSP	1410	0
STH_FEORE	NOF	PM10	2230	0
STH_FEORE	NOF	PM2_5	2230	0
STH_FEORE	NOF	TSP	2230	0
STH_NPK	NOF	PM10	2320	0
STH_NPK	NOF	PM2_5	2320	0
STH_NPK	NOF	TSP	2320	0
STH_OTH_IN	NOF	PM10	2630	0
STH_OTH_IN	NOF	PM2_5	2630	0
STH_OTH_IN	NOF	TSP	2630	0
SYNTH_RUB	RUB	VOC	2717	0
TRA_F_CH4	GAS	CH4	1630	0
TRA_OT	BC1	CH4	4640	130
TRA_OT	BC1	CO	4640	130
TRA_OT	BC1	CO2	4640	130
TRA_OT	BC1	N2O	4640	130
TRA_OT	BC1	NOX	4640	130
TRA_OT	BC1	PM10	4640	130
TRA_OT	BC1	PM2_5	4640	130
TRA_OT	BC1	VOC	4640	130
TRA_OT	HC1	CH4	4640	110
TRA_OT	HC1	CO	4640	110
TRA_OT	HC1	CO2	4640	110
TRA_OT	HC1	N2O	4640	110
TRA_OT	HC1	NH3	4640	110
TRA_OT	HC1	NOX	4640	110
TRA_OT	HC1	PM10	4640	110
TRA_OT	HC1	PM2_5	4640	110
TRA_OT	HC1	SO2	4640	110
TRA_OT	HC1	TSP	4640	110
TRA_OT	HC1	VOC	4640	110
TRA_OT_AGR	GSL	CH4	4400	230
TRA_OT_AGR	GSL	CO	4400	230
TRA_OT_AGR	GSL	N2O	4400	230
TRA_OT_AGR	GSL	NH3	4400	230
[truncated: 506 more rows]

## Sheet: Table S5
SectorID	FuelID	SectorName	FuelName	Default proxy	Backup proxy
1100	100	Public electricity and heat production		CORINE_2012_Industrial_area	CORINE_2012_Industrial_area
1100	200	Public electricity and heat production		CORINE_2012_Industrial_area	CORINE_2012_Industrial_area
1100	300	Public electricity and heat production		CORINE_2012_Industrial_area	CORINE_2012_Industrial_area
1100	400	Public electricity and heat production		CORINE_2012_Industrial_area	CORINE_2012_Industrial_area
1100	500	Public electricity and heat production		CORINE_2012_Industrial_area	CORINE_2012_Industrial_area
1210	100	Oil and gas refining (comb)		TNO_PS for Refineries	CORINE_2012_Industrial_area
1210	200	Oil and gas refining (comb)		TNO_PS for Refineries	CORINE_2012_Industrial_area
1210	300	Oil and gas refining (comb)		TNO_PS for Refineries	CORINE_2012_Industrial_area
1210	400	Oil and gas refining (comb)		TNO_PS for Refineries	CORINE_2012_Industrial_area
1210	500	Oil and gas refining (comb)		TNO_PS for Refineries	CORINE_2012_Industrial_area
1220	0	Oil and gas refining		TNO_PS for Refineries	CORINE_2012_Industrial_area
1310	100	Coal mining (comb)		TNO_PS for Coal mining	CORINE_2012_Industrial_area
1310	200	Coal mining (comb)		TNO_PS for Coal mining	CORINE_2012_Industrial_area
1310	300	Coal mining (comb)		TNO_PS for Coal mining	CORINE_2012_Industrial_area
1310	400	Coal mining (comb)		TNO_PS for Coal mining	CORINE_2012_Industrial_area
1310	500	Coal mining (comb)		TNO_PS for Coal mining	CORINE_2012_Industrial_area
1320	100	Oil production (comb)		TNO_PS for Oil production	CORINE_2012_Industrial_area
1320	200	Oil production (comb)		TNO_PS for Oil production	CORINE_2012_Industrial_area
1320	300	Oil production (comb)		TNO_PS for Oil production	CORINE_2012_Industrial_area
1320	400	Oil production (comb)		TNO_PS for Oil production	CORINE_2012_Industrial_area
1320	500	Oil production (comb)		TNO_PS for Oil production	CORINE_2012_Industrial_area
1330	100	Natural gas production (comb)		TNO_PS for Gas production	CORINE_2012_Industrial_area
1330	200	Natural gas production (comb)		TNO_PS for Gas production	CORINE_2012_Industrial_area
1330	300	Natural gas production (comb)		TNO_PS for Gas production	CORINE_2012_Industrial_area
1330	400	Natural gas production (comb)		TNO_PS for Gas production	CORINE_2012_Industrial_area
1330	500	Natural gas production (comb)		TNO_PS for Gas production	CORINE_2012_Industrial_area
1340	100	Coke ovens (comb)		TNO_PS for Iron and steel - Coke ovens	CORINE_2012_Industrial_area
1340	200	Coke ovens (comb)		TNO_PS for Iron and steel - Coke ovens	CORINE_2012_Industrial_area
1340	300	Coke ovens (comb)		TNO_PS for Iron and steel - Coke ovens	CORINE_2012_Industrial_area
1340	400	Coke ovens (comb)		TNO_PS for Iron and steel - Coke ovens	CORINE_2012_Industrial_area
1340	500	Coke ovens (comb)		TNO_PS for Iron and steel - Coke ovens	CORINE_2012_Industrial_area
1410	0	Coal mining and handling		TNO_PS for Coal mining	CORINE_2012_Industrial_area
1420	0	Coke ovens		TNO_PS for Iron and steel - Coke ovens	CORINE_2012_Industrial_area
1430	0	Other		TNO_PS for Coal mining	CORINE_2012_Industrial_area
1510	0	Exploration, production, transport		TNO_PS for Oil production	CORINE_2012_Industrial_area
1520	0	Distribution of oil products		CORINE_2012_Industrial_area	Population_total
1610	0	Natural gas - production		TNO_PS for Gas production	CORINE_2012_Industrial_area
1620	0	Natural gas - high pressure distribution		Gaslines	Population_total
1630	0	Natural gas - low pressure distribution		Population_urban	Population_total
1700	0	Venting and flaring (oil, gas, combined oil and gas)		TNO_PS for Refineries	CORINE_2012_Industrial_area
1810	0	Other fugitive emissions from energy production		Population_total	Population_total
1820	0	Transport of CO2		Population_total	Population_total
1830	0	Injection and storage		Population_total	Population_total
2110	100	Iron and steel industry (comb)		CORINE_2012_Industrial_area	CORINE_2012_Industrial_area
2110	200	Iron and steel industry (comb)		CORINE_2012_Industrial_area	CORINE_2012_Industrial_area
2110	300	Iron and steel industry (comb)		CORINE_2012_Industrial_area	CORINE_2012_Industrial_area
2110	400	Iron and steel industry (comb)		CORINE_2012_Industrial_area	CORINE_2012_Industrial_area
2110	500	Iron and steel industry (comb)		CORINE_2012_Industrial_area	CORINE_2012_Industrial_area
2120	0	Iron and steel production		CORINE_2012_Industrial_area	CORINE_2012_Industrial_area
2210	100	Non-ferrous metals (comb)		TNO_PS for Non-ferrous metals - Other	CORINE_2012_Industrial_area
2210	200	Non-ferrous metals (comb)		TNO_PS for Non-ferrous metals - Other	CORINE_2012_Industrial_area
2210	300	Non-ferrous metals (comb)		TNO_PS for Non-ferrous metals - Other	CORINE_2012_Industrial_area
2210	400	Non-ferrous metals (comb)		TNO_PS for Non-ferrous metals - Other	CORINE_2012_Industrial_area
2210	500	Non-ferrous metals (comb)		TNO_PS for Non-ferrous metals - Other	CORINE_2012_Industrial_area
2220	0	Aluminium production		TNO_PS for Non-ferrous metals - Aluminium	CORINE_2012_Industrial_area
2230	0	Other non ferrous metal production		TNO_PS for Non-ferrous metals - Other	CORINE_2012_Industrial_area
2310	100	Chemical industry (comb)		TNO_PS for Chemical industry	CORINE_2012_Industrial_area
2310	200	Chemical industry (comb)		TNO_PS for Chemical industry	CORINE_2012_Industrial_area
2310	300	Chemical industry (comb)		TNO_PS for Chemical industry	CORINE_2012_Industrial_area
2310	400	Chemical industry (comb)		TNO_PS for Chemical industry	CORINE_2012_Industrial_area
2310	500	Chemical industry (comb)		TNO_PS for Chemical industry	CORINE_2012_Industrial_area
2320	0	Chemical industry		TNO_PS for Chemical industry	CORINE_2012_Industrial_area
2410	100	Pulp and paper industry (comb)		CORINE_2012_Industrial_area	CORINE_2012_Industrial_area
2410	200	Pulp and paper industry (comb)		CORINE_2012_Industrial_area	CORINE_2012_Industrial_area
2410	300	Pulp and paper industry (comb)		CORINE_2012_Industrial_area	CORINE_2012_Industrial_area
2410	400	Pulp and paper industry (comb)		CORINE_2012_Industrial_area	CORINE_2012_Industrial_area
2410	500	Pulp and paper industry (comb)		CORINE_2012_Industrial_area	CORINE_2012_Industrial_area
2420	0	Pulp and paper industry		CORINE_2012_Industrial_area	CORINE_2012_Industrial_area
2510	100	Food processing, beverages and tobacco (comb)		CORINE_2012_Industrial_area	Population_total
2510	200	Food processing, beverages and tobacco (comb)		CORINE_2012_Industrial_area	Population_total
2510	300	Food processing, beverages and tobacco (comb)		CORINE_2012_Industrial_area	Population_total
2510	400	Food processing, beverages and tobacco (comb)		CORINE_2012_Industrial_area	Population_total
2510	500	Food processing, beverages and tobacco (comb)		CORINE_2012_Industrial_area	Population_total
2520	0	Food and beverages industry		CORINE_2012_Industrial_area	Population_total
2610	100	Non-metallic minerals (combustion)		CORINE_2012_Industrial_area	CORINE_2012_Industrial_area
2610	200	Non-metallic minerals (combustion)		CORINE_2012_Industrial_area	CORINE_2012_Industrial_area
2610	300	Non-metallic minerals (combustion)		CORINE_2012_Industrial_area	CORINE_2012_Industrial_area
2610	400	Non-metallic minerals (combustion)		CORINE_2012_Industrial_area	CORINE_2012_Industrial_area
2610	500	Non-metallic minerals (combustion)		CORINE_2012_Industrial_area	CORINE_2012_Industrial_area
2620	0	Cement production		TNO_PS for Non-metallic minerals - Cement	CORINE_2012_Industrial_area
2630	0	Other non metallic mineral production		CORINE_2012_Industrial_area	CORINE_2012_Industrial_area
2711	0	Domestic solvent use including fungicides		Population_total	Population_total
2712	0	Coating applications		Population_total	Population_total
2713	0	Degreasing		CORINE_2012_Industrial_area	CORINE_2012_Industrial_area
2714	0	Dry cleaning		CORINE_2012_Industrial_area	CORINE_2012_Industrial_area
2715	0	Chemical products		Population_total	Population_total
2716	0	Printing		Population_total	Population_total
2717	0	Other solvent use		Population_total	Population_total
2721	0	Paraffin wax use		Population_total	Population_total
2722	0	Road paving with asphalt		CORINE_2012_Industrial_area	CORINE_2012_Industrial_area
2723	0	Asphalt roofing		CORINE_2012_Industrial_area	CORINE_2012_Industrial_area
2724	0	Other product use		Population_total	Population_total
2810	100	Other manufacturing industry (comb)		CORINE_2012_Industrial_area	CORINE_2012_Industrial_area
2810	200	Other manufacturing industry (comb)		CORINE_2012_Industrial_area	CORINE_2012_Industrial_area
2810	300	Other manufacturing industry (comb)		CORINE_2012_Industrial_area	CORINE_2012_Industrial_area
2810	400	Other manufacturing industry (comb)		CORINE_2012_Industrial_area	CORINE_2012_Industrial_area
2810	500	Other manufacturing industry (comb)		CORINE_2012_Industrial_area	CORINE_2012_Industrial_area
2820	0	Other industrial processes		CORINE_2012_Industrial_area	CORINE_2012_Industrial_area
3110	100	Passenger cars - highway		RoadTransport_Highway_PC	Population_total
3110	200	Passenger cars - highway		RoadTransport_Highway_PC	Population_total
3110	210	Passenger cars - highway		RoadTransport_Highway_PC	Population_total
3110	220	Passenger cars - highway		RoadTransport_Highway_PC	Population_total
3110	230	Passenger cars - highway		RoadTransport_Highway_PC	Population_total
3110	240	Passenger cars - highway		RoadTransport_Highway_PC	Population_total
3110	250	Passenger cars - highway		RoadTransport_Highway_PC	Population_total
3110	260	Passenger cars - highway		RoadTransport_Highway_PC	Population_total
3110	270	Passenger cars - highway		RoadTransport_Highway_PC	Population_total
3110	300	Passenger cars - highway		RoadTransport_Highway_PC	Population_total
3110	400	Passenger cars - highway		RoadTransport_Highway_PC	Population_total
3110	500	Passenger cars - highway		RoadTransport_Highway_PC	Population_total
3120	100	Passenger cars - urban		RoadTransport_Urban_PC	Population_total
3120	200	Passenger cars - urban		RoadTransport_Urban_PC	Population_total
3120	210	Passenger cars - urban		RoadTransport_Urban_PC	Population_total
3120	220	Passenger cars - urban		RoadTransport_Urban_PC	Population_total
3120	230	Passenger cars - urban		RoadTransport_Urban_PC	Population_total
3120	240	Passenger cars - urban		RoadTransport_Urban_PC	Population_total
3120	250	Passenger cars - urban		RoadTransport_Urban_PC	Population_total
3120	260	Passenger cars - urban		RoadTransport_Urban_PC	Population_total
3120	270	Passenger cars - urban		RoadTransport_Urban_PC	Population_total
3120	300	Passenger cars - urban		RoadTransport_Urban_PC	Population_total
3120	400	Passenger cars - urban		RoadTransport_Urban_PC	Population_total
3120	500	Passenger cars - urban		RoadTransport_Urban_PC	Population_total
3130	100	Passenger cars - rural		RoadTransport_Rural_PC	Population_total
3130	200	Passenger cars - rural		RoadTransport_Rural_PC	Population_total
3130	210	Passenger cars - rural		RoadTransport_Rural_PC	Population_total
3130	220	Passenger cars - rural		RoadTransport_Rural_PC	Population_total
3130	230	Passenger cars - rural		RoadTransport_Rural_PC	Population_total
3130	240	Passenger cars - rural		RoadTransport_Rural_PC	Population_total
3130	250	Passenger cars - rural		RoadTransport_Rural_PC	Population_total
3130	260	Passenger cars - rural		RoadTransport_Rural_PC	Population_total
3130	270	Passenger cars - rural		RoadTransport_Rural_PC	Population_total
3130	300	Passenger cars - rural		RoadTransport_Rural_PC	Population_total
3130	400	Passenger cars - rural		RoadTransport_Rural_PC	Population_total
3130	500	Passenger cars - rural		RoadTransport_Rural_PC	Population_total
3210	100	Light duty vehicles - highway		RoadTransport_Highway_LDV	Population_total
3210	200	Light duty vehicles - highway		RoadTransport_Highway_LDV	Population_total
3210	210	Light duty vehicles - highway		RoadTransport_Highway_LDV	Population_total
3210	220	Light duty vehicles - highway		RoadTransport_Highway_LDV	Population_total
3210	230	Light duty vehicles - highway		RoadTransport_Highway_LDV	Population_total
3210	240	Light duty vehicles - highway		RoadTransport_Highway_LDV	Population_total
3210	250	Light duty vehicles - highway		RoadTransport_Highway_LDV	Population_total
3210	260	Light duty vehicles - highway		RoadTransport_Highway_LDV	Population_total
3210	270	Light duty vehicles - highway		RoadTransport_Highway_LDV	Population_total
3210	300	Light duty vehicles - highway		RoadTransport_Highway_LDV	Population_total
3210	400	Light duty vehicles - highway		RoadTransport_Highway_LDV	Population_total
3210	500	Light duty vehicles - highway		RoadTransport_Highway_LDV	Population_total
3220	100	Light duty vehicles - urban		RoadTransport_Urban_LDV	Population_total
3220	200	Light duty vehicles - urban		RoadTransport_Urban_LDV	Population_total
3220	210	Light duty vehicles - urban		RoadTransport_Urban_LDV	Population_total
3220	220	Light duty vehicles - urban		RoadTransport_Urban_LDV	Population_total
3220	230	Light duty vehicles - urban		RoadTransport_Urban_LDV	Population_total
3220	240	Light duty vehicles - urban		RoadTransport_Urban_LDV	Population_total
3220	250	Light duty vehicles - urban		RoadTransport_Urban_LDV	Population_total
3220	260	Light duty vehicles - urban		RoadTransport_Urban_LDV	Population_total
3220	270	Light duty vehicles - urban		RoadTransport_Urban_LDV	Population_total
3220	300	Light duty vehicles - urban		RoadTransport_Urban_LDV	Population_total
3220	400	Light duty vehicles - urban		RoadTransport_Urban_LDV	Population_total
3220	500	Light duty vehicles - urban		RoadTransport_Urban_LDV	Population_total
3230	100	Light duty vehicles - rural		RoadTransport_Rural_LDV	Population_total
3230	200	Light duty vehicles - rural		RoadTransport_Rural_LDV	Population_total
3230	210	Light duty vehicles - rural		RoadTransport_Rural_LDV	Population_total
3230	220	Light duty vehicles - rural		RoadTransport_Rural_LDV	Population_total
3230	230	Light duty vehicles - rural		RoadTransport_Rural_LDV	Population_total
3230	240	Light duty vehicles - rural		RoadTransport_Rural_LDV	Population_total
3230	250	Light duty vehicles - rural		RoadTransport_Rural_LDV	Population_total
3230	260	Light duty vehicles - rural		RoadTransport_Rural_LDV	Population_total
3230	270	Light duty vehicles - rural		RoadTransport_Rural_LDV	Population_total
3230	300	Light duty vehicles - rural		RoadTransport_Rural_LDV	Population_total
3230	400	Light duty vehicles - rural		RoadTransport_Rural_LDV	Population_total
3230	500	Light duty vehicles - rural		RoadTransport_Rural_LDV	Population_total
3310	100	Trucks (>3.5t) - highway		RoadTransport_Highway_HDV	Population_total
3310	200	Trucks (>3.5t) - highway		RoadTransport_Highway_HDV	Population_total
3310	210	Trucks (>3.5t) - highway		RoadTransport_Highway_HDV	Population_total
3310	220	Trucks (>3.5t) - highway		RoadTransport_Highway_HDV	Population_total
3310	230	Trucks (>3.5t) - highway		RoadTransport_Highway_HDV	Population_total
3310	240	Trucks (>3.5t) - highway		RoadTransport_Highway_HDV	Population_total
3310	250	Trucks (>3.5t) - highway		RoadTransport_Highway_HDV	Population_total
3310	260	Trucks (>3.5t) - highway		RoadTransport_Highway_HDV	Population_total
3310	270	Trucks (>3.5t) - highway		RoadTransport_Highway_HDV	Population_total
3310	300	Trucks (>3.5t) - highway		RoadTransport_Highway_HDV	Population_total
3310	400	Trucks (>3.5t) - highway		RoadTransport_Highway_HDV	Population_total
3310	500	Trucks (>3.5t) - highway		RoadTransport_Highway_HDV	Population_total
3320	100	Trucks (>3.5t) - urban		RoadTransport_Urban_HDV	Population_total
3320	200	Trucks (>3.5t) - urban		RoadTransport_Urban_HDV	Population_total
3320	210	Trucks (>3.5t) - urban		RoadTransport_Urban_HDV	Population_total
3320	220	Trucks (>3.5t) - urban		RoadTransport_Urban_HDV	Population_total
3320	230	Trucks (>3.5t) - urban		RoadTransport_Urban_HDV	Population_total
3320	240	Trucks (>3.5t) - urban		RoadTransport_Urban_HDV	Population_total
3320	250	Trucks (>3.5t) - urban		RoadTransport_Urban_HDV	Population_total
3320	260	Trucks (>3.5t) - urban		RoadTransport_Urban_HDV	Population_total
3320	270	Trucks (>3.5t) - urban		RoadTransport_Urban_HDV	Population_total
3320	300	Trucks (>3.5t) - urban		RoadTransport_Urban_HDV	Population_total
3320	400	Trucks (>3.5t) - urban		RoadTransport_Urban_HDV	Population_total
3320	500	Trucks (>3.5t) - urban		RoadTransport_Urban_HDV	Population_total
3330	100	Trucks (>3.5t) - rural		RoadTransport_Rural_HDV	Population_total
3330	200	Trucks (>3.5t) - rural		RoadTransport_Rural_HDV	Population_total
3330	210	Trucks (>3.5t) - rural		RoadTransport_Rural_HDV	Population_total
3330	220	Trucks (>3.5t) - rural		RoadTransport_Rural_HDV	Population_total
3330	230	Trucks (>3.5t) - rural		RoadTransport_Rural_HDV	Population_total
3330	240	Trucks (>3.5t) - rural		RoadTransport_Rural_HDV	Population_total
3330	250	Trucks (>3.5t) - rural		RoadTransport_Rural_HDV	Population_total
3330	260	Trucks (>3.5t) - rural		RoadTransport_Rural_HDV	Population_total
3330	270	Trucks (>3.5t) - rural		RoadTransport_Rural_HDV	Population_total
3330	300	Trucks (>3.5t) - rural		RoadTransport_Rural_HDV	Population_total
3330	400	Trucks (>3.5t) - rural		RoadTransport_Rural_HDV	Population_total
3330	500	Trucks (>3.5t) - rural		RoadTransport_Rural_HDV	Population_total
3410	100	Buses - highway		RoadTransport_Highway_Buses	Population_total
3410	200	Buses - highway		RoadTransport_Highway_Buses	Population_total
3410	210	Buses - highway		RoadTransport_Highway_Buses	Population_total
3410	220	Buses - highway		RoadTransport_Highway_Buses	Population_total
3410	230	Buses - highway		RoadTransport_Highway_Buses	Population_total
3410	240	Buses - highway		RoadTransport_Highway_Buses	Population_total
3410	250	Buses - highway		RoadTransport_Highway_Buses	Population_total
3410	260	Buses - highway		RoadTransport_Highway_Buses	Population_total
3410	270	Buses - highway		RoadTransport_Highway_Buses	Population_total
3410	300	Buses - highway		RoadTransport_Highway_Buses	Population_total
3410	400	Buses - highway		RoadTransport_Highway_Buses	Population_total
3410	500	Buses - highway		RoadTransport_Highway_Buses	Population_total
3420	100	Buses - urban		RoadTransport_Urban_Buses	Population_total
3420	200	Buses - urban		RoadTransport_Urban_Buses	Population_total
3420	210	Buses - urban		RoadTransport_Urban_Buses	Population_total
3420	220	Buses - urban		RoadTransport_Urban_Buses	Population_total
3420	230	Buses - urban		RoadTransport_Urban_Buses	Population_total
3420	240	Buses - urban		RoadTransport_Urban_Buses	Population_total
3420	250	Buses - urban		RoadTransport_Urban_Buses	Population_total
3420	260	Buses - urban		RoadTransport_Urban_Buses	Population_total
3420	270	Buses - urban		RoadTransport_Urban_Buses	Population_total
3420	300	Buses - urban		RoadTransport_Urban_Buses	Population_total
3420	400	Buses - urban		RoadTransport_Urban_Buses	Population_total
3420	500	Buses - urban		RoadTransport_Urban_Buses	Population_total
3430	100	Buses - rural		RoadTransport_Rural_Buses	Population_total
3430	200	Buses - rural		RoadTransport_Rural_Buses	Population_total
3430	210	Buses - rural		RoadTransport_Rural_Buses	Population_total
3430	220	Buses - rural		RoadTransport_Rural_Buses	Population_total
3430	230	Buses - rural		RoadTransport_Rural_Buses	Population_total
3430	240	Buses - rural		RoadTransport_Rural_Buses	Population_total
3430	250	Buses - rural		RoadTransport_Rural_Buses	Population_total
3430	260	Buses - rural		RoadTransport_Rural_Buses	Population_total
3430	270	Buses - rural		RoadTransport_Rural_Buses	Population_total
3430	300	Buses - rural		RoadTransport_Rural_Buses	Population_total
3430	400	Buses - rural		RoadTransport_Rural_Buses	Population_total
3430	500	Buses - rural		RoadTransport_Rural_Buses	Population_total
3510	100	Motorcycles - highway		RoadTransport_Highway_Motorcycles	Population_total
3510	200	Motorcycles - highway		RoadTransport_Highway_Motorcycles	Population_total
3510	210	Motorcycles - highway		RoadTransport_Highway_Motorcycles	Population_total
3510	220	Motorcycles - highway		RoadTransport_Highway_Motorcycles	Population_total
3510	230	Motorcycles - highway		RoadTransport_Highway_Motorcycles	Population_total
3510	240	Motorcycles - highway		RoadTransport_Highway_Motorcycles	Population_total
3510	250	Motorcycles - highway		RoadTransport_Highway_Motorcycles	Population_total
3510	260	Motorcycles - highway		RoadTransport_Highway_Motorcycles	Population_total
3510	270	Motorcycles - highway		RoadTransport_Highway_Motorcycles	Population_total
3510	300	Motorcycles - highway		RoadTransport_Highway_Motorcycles	Population_total
3510	400	Motorcycles - highway		RoadTransport_Highway_Motorcycles	Population_total
3510	500	Motorcycles - highway		RoadTransport_Highway_Motorcycles	Population_total
3520	100	Motorcycles - urban		RoadTransport_Urban_Motorcycles	Population_total
3520	200	Motorcycles - urban		RoadTransport_Urban_Motorcycles	Population_total
3520	210	Motorcycles - urban		RoadTransport_Urban_Motorcycles	Population_total
3520	220	Motorcycles - urban		RoadTransport_Urban_Motorcycles	Population_total
3520	230	Motorcycles - urban		RoadTransport_Urban_Motorcycles	Population_total
3520	240	Motorcycles - urban		RoadTransport_Urban_Motorcycles	Population_total
3520	250	Motorcycles - urban		RoadTransport_Urban_Motorcycles	Population_total
3520	260	Motorcycles - urban		RoadTransport_Urban_Motorcycles	Population_total
3520	270	Motorcycles - urban		RoadTransport_Urban_Motorcycles	Population_total
3520	300	Motorcycles - urban		RoadTransport_Urban_Motorcycles	Population_total
3520	400	Motorcycles - urban		RoadTransport_Urban_Motorcycles	Population_total
3520	500	Motorcycles - urban		RoadTransport_Urban_Motorcycles	Population_total
3530	100	Motorcycles - rural		RoadTransport_Rural_Motorcycles	Population_total
3530	200	Motorcycles - rural		RoadTransport_Rural_Motorcycles	Population_total
3530	210	Motorcycles - rural		RoadTransport_Rural_Motorcycles	Population_total
3530	220	Motorcycles - rural		RoadTransport_Rural_Motorcycles	Population_total
3530	230	Motorcycles - rural		RoadTransport_Rural_Motorcycles	Population_total
3530	240	Motorcycles - rural		RoadTransport_Rural_Motorcycles	Population_total
3530	250	Motorcycles - rural		RoadTransport_Rural_Motorcycles	Population_total
3530	260	Motorcycles - rural		RoadTransport_Rural_Motorcycles	Population_total
3530	270	Motorcycles - rural		RoadTransport_Rural_Motorcycles	Population_total
3530	300	Motorcycles - rural		RoadTransport_Rural_Motorcycles	Population_total
3530	400	Motorcycles - rural		RoadTransport_Rural_Motorcycles	Population_total
3530	500	Motorcycles - rural		RoadTransport_Rural_Motorcycles	Population_total
3610	100	Mopeds - highway		RoadTransport_Highway_Mopeds	Population_total
3610	200	Mopeds - highway		RoadTransport_Highway_Mopeds	Population_total
3610	210	Mopeds - highway		RoadTransport_Highway_Mopeds	Population_total
3610	220	Mopeds - highway		RoadTransport_Highway_Mopeds	Population_total
3610	230	Mopeds - highway		RoadTransport_Highway_Mopeds	Population_total
3610	240	Mopeds - highway		RoadTransport_Highway_Mopeds	Population_total
3610	250	Mopeds - highway		RoadTransport_Highway_Mopeds	Population_total
3610	260	Mopeds - highway		RoadTransport_Highway_Mopeds	Population_total
3610	270	Mopeds - highway		RoadTransport_Highway_Mopeds	Population_total
3610	300	Mopeds - highway		RoadTransport_Highway_Mopeds	Population_total
3610	400	Mopeds - highway		RoadTransport_Highway_Mopeds	Population_total
3610	500	Mopeds - highway		RoadTransport_Highway_Mopeds	Population_total
3620	100	Mopeds - urban		RoadTransport_Urban_Mopeds	Population_total
3620	200	Mopeds - urban		RoadTransport_Urban_Mopeds	Population_total
3620	210	Mopeds - urban		RoadTransport_Urban_Mopeds	Population_total
3620	220	Mopeds - urban		RoadTransport_Urban_Mopeds	Population_total
3620	230	Mopeds - urban		RoadTransport_Urban_Mopeds	Population_total
3620	240	Mopeds - urban		RoadTransport_Urban_Mopeds	Population_total
3620	250	Mopeds - urban		RoadTransport_Urban_Mopeds	Population_total
3620	260	Mopeds - urban		RoadTransport_Urban_Mopeds	Population_total
3620	270	Mopeds - urban		RoadTransport_Urban_Mopeds	Population_total
3620	300	Mopeds - urban		RoadTransport_Urban_Mopeds	Population_total
3620	400	Mopeds - urban		RoadTransport_Urban_Mopeds	Population_total
3620	500	Mopeds - urban		RoadTransport_Urban_Mopeds	Population_total
3630	100	Mopeds - rural		RoadTransport_Rural_Mopeds	Population_total
3630	200	Mopeds - rural		RoadTransport_Rural_Mopeds	Population_total
3630	210	Mopeds - rural		RoadTransport_Rural_Mopeds	Population_total
3630	220	Mopeds - rural		RoadTransport_Rural_Mopeds	Population_total
3630	230	Mopeds - rural		RoadTransport_Rural_Mopeds	Population_total
3630	240	Mopeds - rural		RoadTransport_Rural_Mopeds	Population_total
3630	250	Mopeds - rural		RoadTransport_Rural_Mopeds	Population_total
3630	260	Mopeds - rural		RoadTransport_Rural_Mopeds	Population_total
3630	270	Mopeds - rural		RoadTransport_Rural_Mopeds	Population_total
3630	300	Mopeds - rural		RoadTransport_Rural_Mopeds	Population_total
3630	400	Mopeds - rural		RoadTransport_Rural_Mopeds	Population_total
3630	500	Mopeds - rural		RoadTransport_Rural_Mopeds	Population_total
3711	0	Brake wear - Passenger cars - highway		RoadTransport_Highway_PC	Population_total
3712	0	Brake wear - Passenger cars - urban		RoadTransport_Urban_PC	Population_total
3713	0	Brake wear - Passenger cars - rural		RoadTransport_Rural_PC	Population_total
3721	0	Brake wear - LDV - highway		RoadTransport_Highway_LDV	Population_total
3722	0	Brake wear - LDV - urban		RoadTransport_Urban_LDV	Population_total
3723	0	Brake wear - LDV - rural		RoadTransport_Rural_LDV	Population_total
3731	0	Brake wear - Trucks (>3.5t) - highway		RoadTransport_Highway_HDV	Population_total
3732	0	Brake wear - Trucks (>3.5t) - urban		RoadTransport_Urban_HDV	Population_total
3733	0	Brake wear - Trucks (>3.5t) - rural		RoadTransport_Rural_HDV	Population_total
3741	0	Brake wear - Buses - highway		RoadTransport_Highway_Buses	Population_total
3742	0	Brake wear - Buses - urban		RoadTransport_Urban_Buses	Population_total
3743	0	Brake wear - Buses - rural		RoadTransport_Rural_Buses	Population_total
3751	0	Brake wear - Motorcycles - highway		RoadTransport_Highway_Motorcycles	Population_total
3752	0	Brake wear - Motorcycles - urban		RoadTransport_Urban_Motorcycles	Population_total
3753	0	Brake wear - Motorcycles - rural		RoadTransport_Rural_Motorcycles	Population_total
3761	0	Brake wear - Mopeds - highway		RoadTransport_Highway_Mopeds	Population_total
3762	0	Brake wear - Mopeds - urban		RoadTransport_Urban_Mopeds	Population_total
3763	0	Brake wear - Mopeds - rural		RoadTransport_Rural_Mopeds	Population_total
3811	0	Tyre wear - Passenger cars - highway		RoadTransport_Highway_PC	Population_total
3812	0	Tyre wear - Passenger cars - urban		RoadTransport_Urban_PC	Population_total
3813	0	Tyre wear - Passenger cars - rural		RoadTransport_Rural_PC	Population_total
3821	0	Tyre wear - LDV - highway		RoadTransport_Highway_LDV	Population_total
3822	0	Tyre wear - LDV - urban		RoadTransport_Urban_LDV	Population_total
3823	0	Tyre wear - LDV - rural		RoadTransport_Rural_LDV	Population_total
3831	0	Tyre wear - Trucks (>3.5t) - highway		RoadTransport_Highway_HDV	Population_total
3832	0	Tyre wear - Trucks (>3.5t) - urban		RoadTransport_Urban_HDV	Population_total
3833	0	Tyre wear - Trucks (>3.5t) - rural		RoadTransport_Rural_HDV	Population_total
3841	0	Tyre wear - Buses - highway		RoadTransport_Highway_Buses	Population_total
3842	0	Tyre wear - Buses - urban		RoadTransport_Urban_Buses	Population_total
3843	0	Tyre wear - Buses - rural		RoadTransport_Rural_Buses	Population_total
3851	0	Tyre wear - Motorcycles - highway		RoadTransport_Highway_Motorcycles	Population_total
3852	0	Tyre wear - Motorcycles - urban		RoadTransport_Urban_Motorcycles	Population_total
3853	0	Tyre wear - Motorcycles - rural		RoadTransport_Rural_Motorcycles	Population_total
3861	0	Tyre wear - Mopeds - highway		RoadTransport_Highway_Mopeds	Population_total
3862	0	Tyre wear - Mopeds - urban		RoadTransport_Urban_Mopeds	Population_total
3863	0	Tyre wear - Mopeds - rural		RoadTransport_Rural_Mopeds	Population_total
3911	0	Gasoline evaporation and road wear - Passenger cars - highway		RoadTransport_Highway_PC	Population_total
3912	0	Gasoline evaporation and road wear - Passenger cars - urban		RoadTransport_Urban_PC	Population_total
3913	0	Gasoline evaporation and road wear - Passenger cars - rural		RoadTransport_Rural_PC	Population_total
3921	0	Gasoline evaporation and road wear - LDV - highway		RoadTransport_Highway_LDV	Population_total
3922	0	Gasoline evaporation and road wear - LDV - urban		RoadTransport_Urban_LDV	Population_total
3923	0	Gasoline evaporation and road wear - LDV - rural		RoadTransport_Rural_LDV	Population_total
3931	0	Gasoline evaporation and road wear - Trucks (>3.5t) - highway		RoadTransport_Highway_HDV	Population_total
3932	0	Gasoline evaporation and road wear - Trucks (>3.5t) - urban		RoadTransport_Urban_HDV	Population_total
3933	0	Gasoline evaporation and road wear - Trucks (>3.5t) - rural		RoadTransport_Rural_HDV	Population_total
3941	0	Gasoline evaporation and road wear - Buses - highway		RoadTransport_Rural_HDV	Population_total
3942	0	Gasoline evaporation and road wear - Buses - urban		RoadTransport_Urban_Buses	Population_total
3943	0	Gasoline evaporation and road wear - Buses - rural		RoadTransport_Rural_Buses	Population_total
3951	0	Gasoline evaporation and road wear - Motorcycles - highway		RoadTransport_Highway_Motorcycles	Population_total
3952	0	Gasoline evaporation and road wear - Motorcycles - urban		RoadTransport_Urban_Motorcycles	Population_total
3953	0	Gasoline evaporation and road wear - Motorcycles - rural		RoadTransport_Rural_Motorcycles	Population_total
3961	0	Gasoline evaporation and road wear - Mopeds - highway		RoadTransport_Highway_Mopeds	Population_total
3962	0	Gasoline evaporation and road wear - Mopeds - urban		RoadTransport_Urban_Mopeds	Population_total
3963	0	Gasoline evaporation and road wear - Mopeds - rural		RoadTransport_Rural_Mopeds	Population_total
4100	100	Civil aviation - LTO		Airport distribution for year	TNO_PS for Airports
4100	200	Civil aviation - LTO		Airport distribution for year	TNO_PS for Airports
4100	210	Civil aviation - LTO		Airport distribution for year	TNO_PS for Airports
4100	220	Civil aviation - LTO		Airport distribution for year	TNO_PS for Airports
4100	230	Civil aviation - LTO		Airport distribution for year	TNO_PS for Airports
4100	240	Civil aviation - LTO		Airport distribution for year	TNO_PS for Airports
4100	250	Civil aviation - LTO		Airport distribution for year	TNO_PS for Airports
4100	260	Civil aviation - LTO		Airport distribution for year	TNO_PS for Airports
4100	270	Civil aviation - LTO		Airport distribution for year	TNO_PS for Airports
4100	300	Civil aviation - LTO		Airport distribution for year	TNO_PS for Airports
4100	400	Civil aviation - LTO		Airport distribution for year	TNO_PS for Airports
4100	500	Civil aviation - LTO		Airport distribution for year	TNO_PS for Airports
4200	100	Railways		Rail	Population_total
4200	200	Railways		Rail	Population_total
4200	210	Railways		Rail	Population_total
4200	220	Railways		Rail	Population_total
4200	230	Railways		Rail	Population_total
4200	240	Railways		Rail	Population_total
4200	250	Railways		Rail	Population_total
4200	260	Railways		Rail	Population_total
4200	270	Railways		Rail	Population_total
4200	300	Railways		Rail	Population_total
4200	400	Railways		Rail	Population_total
4200	500	Railways		Rail	Population_total
4310	100	Domestic navigation, inland shipping		Inland_waterways_2000-2017	Population_total
4310	200	Domestic navigation, inland shipping		Inland_waterways_2000-2017	Population_total
4310	210	Domestic navigation, inland shipping		Inland_waterways_2000-2017	Population_total
4310	220	Domestic navigation, inland shipping		Inland_waterways_2000-2017	Population_total
4310	230	Domestic navigation, inland shipping		Inland_waterways_2000-2017	Population_total
4310	240	Domestic navigation, inland shipping		Inland_waterways_2000-2017	Population_total
4310	250	Domestic navigation, inland shipping		Inland_waterways_2000-2017	Population_total
4310	260	Domestic navigation, inland shipping		Inland_waterways_2000-2017	Population_total
4310	270	Domestic navigation, inland shipping		Inland_waterways_2000-2017	Population_total
4310	300	Domestic navigation, inland shipping		Inland_waterways_2000-2017	Population_total
4310	400	Domestic navigation, inland shipping		Inland_waterways_2000-2017	Population_total
4310	500	Domestic navigation, inland shipping		Inland_waterways_2000-2017	Population_total
4400	100	Small combustion - Agriculture/Forestry/Fishing - Off-road vehicles and other machinery		CORINE_2012_Arable_land	CORINE_2012_Arable_land
4400	200	Small combustion - Agriculture/Forestry/Fishing - Off-road vehicles and other machinery		CORINE_2012_Arable_land	CORINE_2012_Arable_land
4400	210	Small combustion - Agriculture/Forestry/Fishing - Off-road vehicles and other machinery		CORINE_2012_Arable_land	CORINE_2012_Arable_land
4400	220	Small combustion - Agriculture/Forestry/Fishing - Off-road vehicles and other machinery		CORINE_2012_Arable_land	CORINE_2012_Arable_land
4400	230	Small combustion - Agriculture/Forestry/Fishing - Off-road vehicles and other machinery		CORINE_2012_Arable_land	CORINE_2012_Arable_land
4400	240	Small combustion - Agriculture/Forestry/Fishing - Off-road vehicles and other machinery		CORINE_2012_Arable_land	CORINE_2012_Arable_land
4400	250	Small combustion - Agriculture/Forestry/Fishing - Off-road vehicles and other machinery		CORINE_2012_Arable_land	CORINE_2012_Arable_land
4400	260	Small combustion - Agriculture/Forestry/Fishing - Off-road vehicles and other machinery		CORINE_2012_Arable_land	CORINE_2012_Arable_land
4400	270	Small combustion - Agriculture/Forestry/Fishing - Off-road vehicles and other machinery		CORINE_2012_Arable_land	CORINE_2012_Arable_land
4400	300	Small combustion - Agriculture/Forestry/Fishing - Off-road vehicles and other machinery		CORINE_2012_Arable_land	CORINE_2012_Arable_land
4400	400	Small combustion - Agriculture/Forestry/Fishing - Off-road vehicles and other machinery		CORINE_2012_Arable_land	CORINE_2012_Arable_land
4400	500	Small combustion - Agriculture/Forestry/Fishing - Off-road vehicles and other machinery		CORINE_2012_Arable_land	CORINE_2012_Arable_land
4500	100	Manufacturing industry - Off-road vehicles and other machinery		CORINE_2012_Industrial_area	CORINE_2012_Industrial_area
4500	200	Manufacturing industry - Off-road vehicles and other machinery		CORINE_2012_Industrial_area	CORINE_2012_Industrial_area
4500	210	Manufacturing industry - Off-road vehicles and other machinery		CORINE_2012_Industrial_area	CORINE_2012_Industrial_area
4500	220	Manufacturing industry - Off-road vehicles and other machinery		CORINE_2012_Industrial_area	CORINE_2012_Industrial_area
4500	230	Manufacturing industry - Off-road vehicles and other machinery		CORINE_2012_Industrial_area	CORINE_2012_Industrial_area
4500	240	Manufacturing industry - Off-road vehicles and other machinery		CORINE_2012_Industrial_area	CORINE_2012_Industrial_area
4500	250	Manufacturing industry - Off-road vehicles and other machinery		CORINE_2012_Industrial_area	CORINE_2012_Industrial_area
4500	260	Manufacturing industry - Off-road vehicles and other machinery		CORINE_2012_Industrial_area	CORINE_2012_Industrial_area
4500	270	Manufacturing industry - Off-road vehicles and other machinery		CORINE_2012_Industrial_area	CORINE_2012_Industrial_area
4500	300	Manufacturing industry - Off-road vehicles and other machinery		CORINE_2012_Industrial_area	CORINE_2012_Industrial_area
4500	400	Manufacturing industry - Off-road vehicles and other machinery		CORINE_2012_Industrial_area	CORINE_2012_Industrial_area
4500	500	Manufacturing industry - Off-road vehicles and other machinery		CORINE_2012_Industrial_area	CORINE_2012_Industrial_area
4610	100	Other transportation, including pipeline compressors		Population_total	Population_total
4610	200	Other transportation, including pipeline compressors		Population_total	Population_total
4610	210	Other transportation, including pipeline compressors		Population_total	Population_total
4610	220	Other transportation, including pipeline compressors		Population_total	Population_total
4610	230	Other transportation, including pipeline compressors		Population_total	Population_total
4610	240	Other transportation, including pipeline compressors		Population_total	Population_total
4610	250	Other transportation, including pipeline compressors		Population_total	Population_total
4610	260	Other transportation, including pipeline compressors		Population_total	Population_total
4610	270	Other transportation, including pipeline compressors		Population_total	Population_total
4610	300	Other transportation, including pipeline compressors		Population_total	Population_total
4610	400	Other transportation, including pipeline compressors		Population_total	Population_total
4610	500	Other transportation, including pipeline compressors		Population_total	Population_total
4620	100	Small combustion - Commercial/institutional - Mobile		CORINE_2012_Industrial_area	CORINE_2012_Industrial_area
4620	200	Small combustion - Commercial/institutional - Mobile		CORINE_2012_Industrial_area	CORINE_2012_Industrial_area
4620	210	Small combustion - Commercial/institutional - Mobile		CORINE_2012_Industrial_area	CORINE_2012_Industrial_area
4620	220	Small combustion - Commercial/institutional - Mobile		CORINE_2012_Industrial_area	CORINE_2012_Industrial_area
4620	230	Small combustion - Commercial/institutional - Mobile		CORINE_2012_Industrial_area	CORINE_2012_Industrial_area
4620	240	Small combustion - Commercial/institutional - Mobile		CORINE_2012_Industrial_area	CORINE_2012_Industrial_area
4620	250	Small combustion - Commercial/institutional - Mobile		CORINE_2012_Industrial_area	CORINE_2012_Industrial_area
4620	260	Small combustion - Commercial/institutional - Mobile		CORINE_2012_Industrial_area	CORINE_2012_Industrial_area
4620	270	Small combustion - Commercial/institutional - Mobile		CORINE_2012_Industrial_area	CORINE_2012_Industrial_area
4620	300	Small combustion - Commercial/institutional - Mobile		CORINE_2012_Industrial_area	CORINE_2012_Industrial_area
4620	400	Small combustion - Commercial/institutional - Mobile		CORINE_2012_Industrial_area	CORINE_2012_Industrial_area
4620	500	Small combustion - Commercial/institutional - Mobile		CORINE_2012_Industrial_area	CORINE_2012_Industrial_area
4630	100	Small combustion - Residential - Household and gardening		Population_total	Population_total
4630	200	Small combustion - Residential - Household and gardening		Population_total	Population_total
4630	210	Small combustion - Residential - Household and gardening		Population_total	Population_total
4630	220	Small combustion - Residential - Household and gardening		Population_total	Population_total
4630	230	Small combustion - Residential - Household and gardening		Population_total	Population_total
4630	240	Small combustion - Residential - Household and gardening		Population_total	Population_total
4630	250	Small combustion - Residential - Household and gardening		Population_total	Population_total
4630	260	Small combustion - Residential - Household and gardening		Population_total	Population_total
4630	270	Small combustion - Residential - Household and gardening		Population_total	Population_total
4630	300	Small combustion - Residential - Household and gardening		Population_total	Population_total
4630	400	Small combustion - Residential - Household and gardening		Population_total	Population_total
4630	500	Small combustion - Residential - Household and gardening		Population_total	Population_total
4640	100	Other mobile combustion		Population_total	Population_total
4640	200	Other mobile combustion		Population_total	Population_total
4640	210	Other mobile combustion		Population_total	Population_total
4640	220	Other mobile combustion		Population_total	Population_total
4640	230	Other mobile combustion		Population_total	Population_total
4640	240	Other mobile combustion		Population_total	Population_total
4640	250	Other mobile combustion		Population_total	Population_total
4640	260	Other mobile combustion		Population_total	Population_total
4640	270	Other mobile combustion		Population_total	Population_total
4640	300	Other mobile combustion		Population_total	Population_total
4640	400	Other mobile combustion		Population_total	Population_total
4640	500	Other mobile combustion		Population_total	Population_total
4710	100	International shipping, at sea		International_shipping_CAMS_for_	International_shipping_CAMS_for_CO2
4710	200	International shipping, at sea		International_shipping_CAMS_for_	International_shipping_CAMS_for_CO2
4710	210	International shipping, at sea		International_shipping_CAMS_for_	International_shipping_CAMS_for_CO2
4710	220	International shipping, at sea		International_shipping_CAMS_for_	International_shipping_CAMS_for_CO2
4710	230	International shipping, at sea		International_shipping_CAMS_for_	International_shipping_CAMS_for_CO2
4710	240	International shipping, at sea		International_shipping_CAMS_for_	International_shipping_CAMS_for_CO2
4710	250	International shipping, at sea		International_shipping_CAMS_for_	International_shipping_CAMS_for_CO2
4710	260	International shipping, at sea		International_shipping_CAMS_for_	International_shipping_CAMS_for_CO2
4710	270	International shipping, at sea		International_shipping_CAMS_for_	International_shipping_CAMS_for_CO2
4710	300	International shipping, at sea		International_shipping_CAMS_for_	International_shipping_CAMS_for_CO2
4710	400	International shipping, at sea		International_shipping_CAMS_for_	International_shipping_CAMS_for_CO2
4710	500	International shipping, at sea		International_shipping_CAMS_for_	International_shipping_CAMS_for_CO2
4720	100	International shipping, in ports		Population_total	Population_total
4720	200	International shipping, in ports		Population_total	Population_total
4720	210	International shipping, in ports		Population_total	Population_total
4720	220	International shipping, in ports		Population_total	Population_total
4720	230	International shipping, in ports		Population_total	Population_total
4720	240	International shipping, in ports		Population_total	Population_total
4720	250	International shipping, in ports		Population_total	Population_total
4720	260	International shipping, in ports		Population_total	Population_total
4720	270	International shipping, in ports		Population_total	Population_total
4720	300	International shipping, in ports		Population_total	Population_total
4720	400	International shipping, in ports		Population_total	Population_total
4720	500	International shipping, in ports		Population_total	Population_total
5100	100	Commercial/institutional		Population_rural	Population_total
5100	200	Commercial/institutional		Population_total	Population_total
5100	300	Commercial/institutional		Population_total	Population_total
5100	400	Commercial/institutional		Wood_use_2014	Population_total
5100	500	Commercial/institutional		Population_rural	Population_total
5200	100	Residential		Population_rural	Population_total
5200	200	Residential		Population_total	Population_total
5200	300	Residential		Population_total	Population_total
5200	400	Residential		Wood_use_2014	Population_total
5200	500	Residential		Population_rural	Population_total
5300	100	Agriculture/Forestry/Fishing		CORINE_2012_Arable_land	CORINE_2012_Arable_land
5300	200	Agriculture/Forestry/Fishing		CORINE_2012_Arable_land	CORINE_2012_Arable_land
5300	300	Agriculture/Forestry/Fishing		CORINE_2012_Arable_land	CORINE_2012_Arable_land
5300	400	Agriculture/Forestry/Fishing		Wood_use_2014	CORINE_2012_Arable_land
5300	500	Agriculture/Forestry/Fishing		CORINE_2012_Arable_land	CORINE_2012_Arable_land
5400	100	Other stationary combustion		Population_rural	Population_total
5400	200	Other stationary combustion		Population_total	Population_total
5400	300	Other stationary combustion		Population_total	Population_total
5400	400	Other stationary combustion		Wood_use_2014	Population_total
5400	500	Other stationary combustion		Population_rural	Population_total
6110	0	Enteric fermentation - Cattle		FAO_livestock_2018_cattle	Population_total
6120	0	Enteric fermentation - Sheep		FAO_livestock_2018_sheep	Population_total
6130	0	Enteric fermentation - Swine		FAO_livestock_2018_pigs	Population_total
6140	0	Enteric fermentation - Other animals		FAO_livestock_2018_all_animals	Population_total
6210	0	Manure management - Cattle		FAO_livestock_2018_cattle	Population_total
6220	0	Manure management - Sheep		FAO_livestock_2018_sheep	Population_total
6230	0	Manure management - Swine		FAO_livestock_2018_pigs	Population_total
6241	0	Manure management - Buffalo		FAO_livestock_2018_all_animals	Population_total
6242	0	Manure management - Goats		FAO_livestock_2018_goats	Population_total
6243	0	Manure management - Horses		FAO_livestock_2018_all_animals	Population_total
6244	0	Manure management - Mules and asses		FAO_livestock_2018_all_animals	Population_total
6245	0	Manure management - Poultry		FAO_livestock_2018_chicken	Population_total
6246	0	Manure management - Other animals		FAO_livestock_2018_all_animals	Population_total
6310	0	Inorganic N-fertilizers (includes also urea application)		CAPRI_manure_application	CORINE_2012_Arable_land
6320	0	Animal manure applied to soils		CAPRI_mineral_fertilizer_application	CORINE_2012_Arable_land
6330	0	Sewage sludge applied to soils		CORINE_2012_Arable_land	Population_total
6340	0	Other organic fertilisers applied to soils (including compost)		CORINE_2012_Arable_land	Population_total
6350	0	Urine and dung deposited by grazing animals		CORINE_2012_Arable_land	Population_total
6360	0	Crop residues applied to soils		CORINE_2012_Arable_land	Population_total
6410	0	Indirect emissions from managed soils		CORINE_2012_Arable_land	Population_total
6420	0	Farm-level agricultural operations including storage, handling and transport of agricultural products		CORINE_2012_Arable_land	Population_total
6430	0	Off-farm storage, handling and transport of bulk agricultural products		TNO_PS for Storage and handling	CORINE_2012_Arable_land
6440	0	Cultivated crops		CORINE_2012_Arable_land	Population_total
6450	0	Use of pesticides		CORINE_2012_Arable_land	Population_total
6510	0	Rice cultivation		CORINE_2012_Rice_fields	CORINE_2012_Arable_land
6520	0	Field burning of agricultural residues		Agricultural_waste_burning	CORINE_2012_Arable_land
6530	0	Liming		CORINE_2012_Arable_land	Population_total
6540	0	Urea application		CORINE_2012_Arable_land	Population_total
6550	0	Other carbon-containing fertilizers		CORINE_2012_Arable_land	Population_total
6560	0	Other		CORINE_2012_Arable_land	Population_total
7100	0	Landfills		Population_total	Population_total
7200	0	Composting and anaerobic digestion		Population_total	Population_total
7310	0	Municipal waste incineration		TNO_PS for Waste incineration	CORINE_2012_Industrial_area
7320	0	Industrial waste incineration		TNO_PS for Waste incineration	CORINE_2012_Industrial_area
7330	0	Hazardous waste incineration		TNO_PS for Waste incineration	CORINE_2012_Industrial_area
7340	0	Clinical waste incineration		TNO_PS for Waste incineration	CORINE_2012_Industrial_area
7350	0	Sewage sludge incineration		TNO_PS for Waste incineration	CORINE_2012_Industrial_area
7360	0	Cremation		Population_total	Population_total
7370	0	Other waste incineration (please specify in the IIR)		Population_total	Population_total
7400	0	Open burning of waste		Population_rural	Population_total
7510	0	Domestic wastewater		Waste_water_treatment_plants	Population_total
7520	0	Industrial wastewater		CORINE_2012_Industrial_area	Population_total
7530	0	Other wastewater		Waste_water_treatment_plants	Population_total
7600	0	Other waste		Population_total	Population_total

## Sheet: Table S6
Table S6
Country group definition				Sea region definition
Country group	ISO3	Country name		ISO3	Sea region
EU+_East	BGR	Bulgaria		ATL	Atlantic Ocean
EU+_East	CZE	Czech Republic		BAR	Barentz Sea
EU+_East	HUN	Hungary		BAS	Baltic Sea
EU+_East	POL	Poland		BLS	Black Sea
EU+_East	ROU	Romania		CAS	Caspian Sea
EU+_East	SVK	Slovakia		ENC	English Channel
EU+_East	SVN	Slovenia		GRS	Greenland Sea
EU+_North	DNK	Denmark		IRC	Irish Sea
EU+_North	EST	Estonia		KAR	Kara Sea
EU+_North	FIN	Finland		MED	Mediterranean Sea
EU+_North	ISL	Iceland		NOS	North Sea
EU+_North	LTU	Lithuania		NWS	Norwegian Sea
EU+_North	LVA	Latvia		PSG	Persian Gulf
EU+_North	NOR	Norway
EU+_North	SWE	Sweden
EU+_South	CYP	Cyprus
EU+_South	ESP	Spain
EU+_South	GRC	Greece
EU+_South	HRV	Croatia
EU+_South	ITA	Italy
EU+_South	MLT	Malta
EU+_South	PRT	Portugal
EU+_WestCentral	AUT	Austria
EU+_WestCentral	BEL	Belgium
EU+_WestCentral	CHE	Switzerland
EU+_WestCentral	DEU	Germany
EU+_WestCentral	FRA	France
EU+_WestCentral	GBR	United Kingdom
EU+_WestCentral	IRL	Ireland
EU+_WestCentral	LUX	Luxembourg
EU+_WestCentral	NLD	Netherlands
NON_EU	ALB	Albania
NON_EU	BIH	Bosnia and Herzegovina
NON_EU	BLR	Belarus
NON_EU	KOS	Kosovo
NON_EU	MDA	Moldova
NON_EU	MKD	North Macedonia
NON_EU	MNE	Montenegro
NON_EU	RUS	Russian Federation
NON_EU	SRB	Serbia
NON_EU	TUR	Turkey
NON_EU	UKR	Ukraine

## Sheet: Table S7
Table S7
Total emissions per pollutant, country (incl. country group), year and GNFR category - country groups defined in Table S6
Unit for all pollutants: kton
Note: NOX is expressed as NO2; CO2 is split in CO2_FF (from fossil fuels) and CO2_BF (from biofuels)
Pollutant	CountryGroupNew	ISO3	Year	A	B	C	D	E	F1	F2	F3	F4	G	H	I	J	K	L
CH4	EU+_East	BGR	2000	0.249065	2.14643	9.52309	54.7425	0	1.02571	0.212457	0.179197	0	0	0.00182385	0.0558639	245.839	90.2115	3.3753
CH4	EU+_East	CZE	2000	0.775507	4.18625	29.344	272.042	0	2.28925	0.435552	0.062572	0	0	3.29e-05	0.154311	143.897	160.79	0.016026
CH4	EU+_East	HUN	2000	0.424958	1.55689	19.0106	52.5795	0	1.7088	0.41677	0.0112944	0	0	2.92e-05	0.119907	158.803	115.59	1.0087
CH4	EU+_East	POL	2000	1.84849	6.63663	102.705	725.152	0	7.05933	0.906519	0.336848	0	0	0.000405919	0.489551	697.089	581.481	0.359183
CH4	EU+_East	ROU	2000	0.595805	4.9041	33.9996	755.061	0	2.08706	0.470688	0.0406152	0	0	0.00222655	0.0394878	212.767	718.302	3.4789
CH4	EU+_East	SVK	2000	0.180204	0.862115	7.58166	92.6697	0	0.67906	0.227035	0.0137623	0	0	4.966e-05	0.0797339	49.8351	59.2473	0.00851729
CH4	EU+_East	SVN	2000	0.0605977	0.441985	4.98733	14.1874	0	0.770874	0.0875192	0	0	0	2.01e-05	0.047539	32.9422	48.9864	0.0432541
CH4	EU+_North	DNK	2000	14.6329	1.04489	8.49219	9.86775	0.134148	1.7731	0.404148	7.33e-05	0	0	0.00332076	0.354974	49.3074	228.647	0.0142328
CH4	EU+_North	EST	2000	0.246353	0.048434	4.64926	1.08745	0	0.389233	0.0613108	1e-05	0	0	3.35e-05	0.0139803	21.1361	21.7931	0.301494
CH4	EU+_North	FIN	2000	0.695787	0.698791	6.93897	2.50129	0.00703	1.80121	0.336995	0.00145747	0	0	0.005435	0.43991	149.581	100.989	0.00836908
CH4	EU+_North	ISL	2000	0.00158643	0.120282	0.00375829	0.0605024	0.00167819	0.0766754	0.0079596	0	0	0	0.0001948	0.0110434	10.2706	13.4299	0
CH4	EU+_North	LTU	2000	0.22386	0.136584	6.62691	15.7406	0	1.48258	0.489582	1.43872	0	0	2.75e-05	0.0341823	65.6264	81.5759	0.082147
CH4	EU+_North	LVA	2000	0.145158	0.11781	7.34815	6.02545	0	0.359134	0.0812055	0.0172673	0	0	1.137e-05	0.0698539	25.6751	32.4687	0.427776
CH4	EU+_North	NOR	2000	0.220588	1.32453	7.33984	39.9205	0	1.62681	0.060037	0.00010579	0	0	0.0317744	0.917515	69.5869	103.063	0.011319
CH4	EU+_North	SWE	2000	0.928396	1.23759	3.85078	4.43705	0	3.22624	0.117507	0.0102194	0	0	0.0213766	0.478446	117.741	141.455	0.0121035
CH4	EU+_South	CYP	2000	0.112	0.049944	0.14487	0.0101306	0	0.163656	0.0724044	0	0	0	0.000121	0	17.8175	12.8285	0.0184915
CH4	EU+_South	ESP	2000	1.2356	37.2753	31.4676	52.7435	0	8.85011	2.4976	0.122642	0	0	0.0517707	0.509225	458.061	1078.97	20.3221
CH4	EU+_South	GRC	2000	0.649894	0.635353	4.92176	57.9279	0	4.28968	0.496208	0.0118441	0	0	0.00420178	0.373299	201.098	189.213	4.65739
CH4	EU+_South	HRV	2000	0.107851	0.34828	12.3089	9.52937	0	1.25743	0.148814	0.00758953	0	0	0.00017807	0.0608655	50.5285	66.6334	0.00874143
CH4	EU+_South	ITA	2000	3.78725	13.7842	54.5105	300.571	0	24.2508	3.56254	3.33349	0	0	0.0478565	0.859805	805.745	751.743	68.076
CH4	EU+_South	MLT	2000	0.0650283	0.00165911	0.0381897	0	0	0.0811264	0.0187306	0	0	0	4.91e-07	0.000333398	5.85142	1.70411	0.0116007
CH4	EU+_South	PRT	2000	0.455259	3.35612	13.2381	1.74245	0.075628	2.56889	0.800721	0.0228618	0	0	0.0301691	0.0495542	235.363	182.532	4.93057
CH4	EU+_WestCentral	AUT	2000	0.304355	2.07503	14.1613	13.2701	0	1.0071	0.137984	0.0049405	0	0	0.00484449	0.151394	110.609	194.008	0.00100863
CH4	EU+_WestCentral	BEL	2000	1.12536	2.72714	8.02397	26.9926	0	1.61507	0.869497	0.0476188	0	0	0.00234943	0.424899	143.72	254.635	0.00593969
CH4	EU+_WestCentral	CHE	2000	0.0348523	0.376603	4.76417	12.7914	0	2.1717	0.0474457	0	0	0	0.00770286	0.428102	27.7444	162.898	0.16821
CH4	EU+_WestCentral	DEU	2000	13.3958	38.6168	34.5366	917.406	0.816101	17.5144	1.10513	0.000685806	0	0	0.0936795	2.68825	1108.61	1415.59	1.2571
CH4	EU+_WestCentral	FRA	2000	0.641246	14.3707	134.935	140.2	0.0678471	18.0936	5.30032	0.135799	0	0	0.0993083	1.00284	768.975	1681.92	5.65206
CH4	EU+_WestCentral	GBR	2000	3.84158	9.52874	39.4232	646.256	0	21.2445	3.29931	0.00838296	0	0	0.218322	1.58803	2464.58	1146	10.7886
CH4	EU+_WestCentral	IRL	2000	0.429242	0.344335	8.32605	3.53219	0	1.27514	0.364728	0.00148762	0	0	0.00192617	0.0499683	53.2875	506.19	0.246225
CH4	EU+_WestCentral	LUX	2000	0.0434301	0.0606729	0.393578	1.19762	0	0.071441	0.00486797	0.000194998	0	0	4.71e-06	0.0221233	3.78297	17.6309	0
CH4	EU+_WestCentral	NLD	2000	3.41416	15.0582	34.5194	37.2331	1.86077	3.06819	0.475834	0.0905884	0	0	0.000395508	0.390169	384.362	490.213	0.00437071
CH4	NON_EU	ALB	2000	0.00832656	0.0652891	1.14214	4.0831	0	0.14473	0.224045	0	0	0	0	0.0141046	41.5656	75.9089	0.573345
CH4	NON_EU	BIH	2000	0.139477	0.64003	6.58277	29.6518	0	0.381526	0.436492	0	0	0	0	0.000874939	72.8996	42.3241	0.0190518
CH4	NON_EU	BLR	2000	61.8998	3.96404	31.2813	50.3744	0	4.08486	0.955121	0.322449	0	0	0	0.396976	217.649	293.062	0.906307
CH4	NON_EU	KOS	2000	0.0278003	0.00663185	1.75659	5.53247	0	0.027462	0.136002	0	0	0	0	0.0134236	23.1192	21.709	0.0654486
CH4	NON_EU	MDA	2000	9.41134	1.17044	8.0834	2.536	0	0.213611	0.0648462	0.238024	0	0	0	0.0265227	44.8924	39.3879	0.636555
CH4	NON_EU	MKD	2000	0.314457	0.241283	2.07082	6.203	0	0.120366	0.0992024	0.00925889	0	0	0	0.000912738	25.5049	27.7425	0.075647
CH4	NON_EU	MNE	2000	0.00576987	0.00580286	0.623187	1.11524	0	0.0209235	0.0217953	0	0	0	0	0.00439737	11.6947	9.22488	0.419531
CH4	NON_EU	RUS	2000	861.07	139.753	1133.34	8158.96	0	47.6379	5.38818	0.68632	0	0	0.0546326	0.821778	3470.31	1715.79	50.7703
CH4	NON_EU	SRB	2000	2.15164	2.30374	14.2728	62.1484	0	0.369212	0.151259	0.0483855	0	0	0	0.0576287	97.897	110.046	0.58859
CH4	NON_EU	TUR	2000	15.6298	5.92899	71.5397	96.5198	0	4.68221	5.08444	0.08296	0	0	0.0154702	1.27084	804.988	834.059	41.4442
CH4	NON_EU	UKR	2000	73.8604	6.63214	166.428	1739.83	0	10.6575	1.30167	0.493	0	0	0.00490327	0.304306	741.464	719.577	47.1141
CH4	EU+_East	BGR	2001	0.286613	2.54615	8.08867	51.8827	0	0.847462	0.232179	0.233965	0	0	0.00293752	0.0508922	233.312	78.6721	3.49274
CH4	EU+_East	CZE	2001	0.815771	4.10034	30.3505	256.705	0	2.2274	0.459772	0.0612289	0	0	5.57e-05	0.146924	148.457	160.997	0.016026
CH4	EU+_East	HUN	2001	0.44062	1.51316	20.9998	52.3525	0	1.69845	0.428973	0.0119568	0	0	2.86e-05	0.110911	158.945	111.59	0.770286
CH4	EU+_East	POL	2001	1.92232	6.01229	112.502	826.586	0	5.74309	0.897351	0.444563	0	0	0.000400827	0.458732	678.341	561.468	0.359183
CH4	EU+_East	ROU	2001	0.576634	4.99711	34.7821	739.576	0	2.11173	0.476253	0.0410955	0	0	0.00222655	0.0376334	210.022	686.832	3.48591
CH4	EU+_East	SVK	2001	0.170823	0.88606	7.83688	88.2959	0	0.769901	0.243254	0.0182586	0	0	4.694e-05	0.0645844	50.3927	58.5629	0.00851729
CH4	EU+_East	SVN	2001	0.0672651	0.518772	4.9835	13.2654	0	0.713777	0.0907875	0	0	0	1.64e-05	0.0458385	33.8745	48.22	0.0432541
CH4	EU+_North	DNK	2001	15.5163	1.10485	8.42001	10.1799	0.121682	1.6179	0.397575	4.72e-05	0	0	0.00327526	0.359021	51.0667	235.368	0.0142328
CH4	EU+_North	EST	2001	0.288737	0.0615106	4.51512	1.16761	0	0.445896	0.0724904	9e-06	0	0	3.67e-05	0.0130863	21.4899	22.7607	0.301494
CH4	EU+_North	FIN	2001	0.875751	0.653981	7.52563	3.11004	0.0073	1.64443	0.324111	0.00177914	0	0	0.005331	0.44547	143.202	100.455	0.00836908
CH4	EU+_North	ISL	2001	0.0015581	0.126963	0.00325324	0.0612716	0.00162358	0.0771559	0.0081229	0	0	0	0.0001713	0.010803	10.6485	13.5195	0
CH4	EU+_North	LTU	2001	0.233261	0.173835	6.69863	14.7016	0	1.30864	0.432144	1.26993	0	0	2.75e-05	0.0343195	63.8521	81.2734	0.082147
CH4	EU+_North	LVA	2001	0.159172	0.158199	8.12213	5.84332	0	0.368127	0.109896	0.0205105	0	0	1.298e-05	0.0661011	26.3243	34.3103	0.427776
CH4	EU+_North	NOR	2001	0.238577	1.44147	7.68381	44.0718	0	1.533	0.0569378	0.000262523	0	0	0.0369572	0.979517	66.9855	102.36	0.011319
CH4	EU+_North	SWE	2001	1.1318	1.45775	3.60569	4.65472	0	2.93877	0.109527	0.012117	0	0	0.0175596	0.471934	115.647	140.541	0.0121035
CH4	EU+_South	CYP	2001	0.109	0.048126	0.14624	0.0101641	0	0.164938	0.0724444	0	0	0	0.000136	0	18.1517	13.7156	0.0184915
CH4	EU+_South	ESP	2001	1.22776	40.1793	32.1571	52.3458	0	7.99698	2.50522	0.132174	0	0	0.0527681	0.503677	470.017	1087.34	20.3443
CH4	EU+_South	GRC	2001	0.640749	0.617622	4.49146	59.9637	0	4.36264	0.511179	0.01122	0	0	0.00376525	0.37035	170.435	190.26	4.90063
CH4	EU+_South	HRV	2001	0.133227	0.346171	13.5056	10.1661	0	1.05347	0.148947	0.00895523	0	0	0.00019814	0.0579522	51.318	67.6836	0.00874143
CH4	EU+_South	ITA	2001	3.80462	12.8777	51.9958	284.054	0	22.423	3.62883	3.26172	0	0	0.0459798	0.755414	854.956	729.11	68.0046
CH4	EU+_South	MLT	2001	0.0674403	0.00165911	0.0382514	0	0	0.078797	0.0181928	0	0	0	4.91e-07	0.000333398	6.01101	1.70546	0.0116007
CH4	EU+_South	PRT	2001	0.458482	2.96889	12.8255	1.98693	0.109032	2.20971	0.802208	0.0520265	0	0	0.0333025	0.0520794	241.73	177.386	4.93108
CH4	EU+_WestCentral	AUT	2001	0.364768	2.09155	14.7622	13.2668	0	0.956603	0.140965	0.00493455	0	0	0.00397687	0.151837	106.18	191.44	0.00100863
CH4	EU+_WestCentral	BEL	2001	1.16263	2.78522	8.82461	26.634	0	1.48333	0.808345	0.052489	0	0	0.00227646	0.4158	126.185	253.855	0.00593969
CH4	EU+_WestCentral	CHE	2001	0.0322969	0.394749	4.96592	12.1815	0	1.99671	0.0427265	0	0	0	0.00701242	0.401558	28.4423	164.325	0.16821
CH4	EU+_WestCentral	DEU	2001	12.4919	37.3926	36.9613	823.852	0.765881	16.0696	1.01551	0.000591621	0	0	0.088991	2.37523	1043.31	1433.58	1.74961
CH4	EU+_WestCentral	FRA	2001	0.614202	14.0136	131.165	131.126	0.0617991	16.884	5.13167	0.189602	0	0	0.0852823	0.942307	778.499	1681.17	5.51529
CH4	EU+_WestCentral	GBR	2001	4.13541	9.268	39.5493	595.865	0	18.4001	3.13143	0.0205018	0	0	0.236023	1.57492	2383.02	1086.21	10.4446
CH4	EU+_WestCentral	IRL	2001	0.449308	0.363716	7.94777	4.0595	0	1.24856	0.368093	0.00106972	0	0	0.00189661	0.0518717	57.2707	503.064	0.246225
CH4	EU+_WestCentral	LUX	2001	0.0458111	0.0710356	0.416186	1.331	0	0.0654936	0.00490834	0.00023207	0	0	4.68e-06	0.0216799	3.75609	17.7134	0
CH4	EU+_WestCentral	NLD	2001	3.66843	14.8498	34.2143	36.5992	1.84711	3.00745	0.449686	0.0757032	0	0	0.000365745	0.370793	362.142	486.887	0.00437071
CH4	NON_EU	ALB	2001	0.00786125	0.0690313	1.14217	4.36288	0	0.151184	0.234036	0	0	0	0	0.0132837	41.1211	74.4261	0.573345
CH4	NON_EU	BIH	2001	0.168382	0.777424	6.60325	29.6956	0	0.352421	0.403193	0	0	0	0	0.000899951	68.8479	42.7269	0.0190518
CH4	NON_EU	BLR	2001	64.0934	4.12423	32.1564	52.2757	0	3.80249	0.889097	0.300159	0	0	0	0.373981	208.61	289.208	0.906307
CH4	NON_EU	KOS	2001	0.0328402	0.00690548	1.75606	5.53918	0	0.0345696	0.171202	0	0	0	0	0.0223388	22.1225	20.94	0.0654486
CH4	NON_EU	MDA	2001	9.36987	1.25115	8.74017	2.6606	0	0.226889	0.068877	0.252819	0	0	0	0.0236182	47.9809	38.0448	0.636555
CH4	NON_EU	MKD	2001	0.294966	0.247026	2.07092	6.203	0	0.114493	0.094362	0.00880712	0	0	0	0.000930191	24.9185	27.3538	0.075647
CH4	NON_EU	MNE	2001	0.00681589	0.00604229	0.622795	1.11659	0	0.0263388	0.0274362	0	0	0	0	0.0073179	11.1906	8.8981	0.419531
CH4	NON_EU	RUS	2001	871.385	144.046	1109.74	8402.73	0	45.6483	5.16314	0.657656	0	0	0.0581061	0.852022	3415.97	1661.35	50.7703
CH4	NON_EU	SRB	2001	2.54171	2.39879	14.0775	62.2237	0	0.464769	0.190407	0.0609084	0	0	0	0.095903	93.6768	106.148	0.58859
CH4	NON_EU	TUR	2001	17.6427	6.53439	75.6244	96.3792	0	4.49077	4.87655	0.079568	0	0	0.0165761	1.26147	833.288	811.83	41.6135
CH4	NON_EU	UKR	2001	72.5017	12.4265	168.064	1767.72	0	10.8218	1.32173	0.5006	0	0	0.00532262	0.306845	724.48	677.247	47.0958
CH4	EU+_East	BGR	2002	0.258777	2.50186	10.9565	51.0203	0	0.886024	0.230579	0.264412	0	0	0.00189861	0.0514629	222.418	81.3933	3.5896
CH4	EU+_East	CZE	2002	0.804386	4.15178	29.3164	238.679	0	2.14546	0.477718	0.0962828	0	0	7.534e-05	0.144512	152.418	159.26	0.016026
CH4	EU+_East	HUN	2002	0.369511	1.57202	14.4705	52.6174	0	1.67256	0.450294	0.0122052	0	0	2.805e-05	0.110616	162.169	111.896	0.706565
CH4	EU+_East	POL	2002	1.88749	6.08383	117.121	782.144	0	5.01715	0.83067	0.61328	0	0	0.000416461	0.456137	665.058	551.057	0.359183
CH4	EU+_East	ROU	2002	0.557462	5.09012	35.5647	724.092	0	2.13641	0.481819	0.0415757	0	0	0.00222655	0.0357789	207.278	655.361	3.49291
CH4	EU+_East	SVK	2002	0.168937	1.89964	6.32156	85.2935	0	0.674038	0.262723	0.0331589	0	0	4.878e-05	0.0739815	50.8848	58.4844	0.00851729
CH4	EU+_East	SVN	2002	0.0692774	0.497601	5.21457	14.6488	0	0.633449	0.0860961	0	0	0	1.64e-05	0.0470257	33.9934	50.0402	0.0432541
CH4	EU+_North	DNK	2002	15.0807	1.00552	8.45114	9.67558	0.153221	1.49227	0.3859	3.48e-05	0	0	0.00292892	0.355432	48.5944	236.057	0.0142328
CH4	EU+_North	EST	2002	0.287065	0.0504277	4.53647	0.97799	0	0.374554	0.0822833	1.8e-05	0	0	6.93e-05	0.0194413	20.9476	21.9064	0.301494
CH4	EU+_North	FIN	2002	1.10806	0.636145	7.4955	2.56051	0.00709	1.42685	0.309287	0.00324361	0	0	0.004631	0.452242	132.828	101.916	0.00836908
CH4	EU+_North	ISL	2002	0.00163771	0.13261	0.00294805	0.0615345	0.00181703	0.0778093	0.0083511	0	0	0	0.0001502	0.0101169	10.8141	13.2499	0
CH4	EU+_North	LTU	2002	0.242662	0.211086	6.77035	13.6626	0	1.1347	0.374706	1.10114	0	0	2.75e-05	0.0344568	62.0778	80.9708	0.082147
CH4	EU+_North	LVA	2002	0.171671	0.156413	7.84197	6.10256	0	0.332884	0.112834	0.0175123	0	0	1.446e-05	0.065334	25.6411	33.9882	0.427776
CH4	EU+_North	NOR	2002	0.245427	1.46127	8.76693	40.7315	0	1.44662	0.0542126	0.00104969	0	0	0.0335806	1.00847	63.5596	101.88	0.011319
CH4	EU+_North	SWE	2002	1.264	1.33822	3.71636	4.39207	0	2.68013	0.104238	0.013348	0	0	0.0156262	0.472493	108.186	138.61	0.0121035
CH4	EU+_South	CYP	2002	0.113	0.050103	0.15641	0.0099301	0	0.160685	0.0673256	0	0	0	0.000121	0	18.399	14.408	0.0184915
CH4	EU+_South	ESP	2002	1.46986	42.0049	32.6199	50.9896	0	6.85998	2.51906	0.144601	0	0	0.0507686	0.495563	479.026	1084.71	19.5873
CH4	EU+_South	GRC	2002	0.634712	0.632903	3.47298	63.6676	0	4.26802	0.522722	0.0477539	0	0	0.00323495	0.388884	168.749	192.546	5.15969
CH4	EU+_South	HRV	2002	0.143952	0.339951	12.9648	10.3756	0	0.997467	0.164842	0.00915358	0	0	0.00022012	0.0536612	53.1615	66.3861	0.00874143
CH4	EU+_South	ITA	2002	3.95574	12.0951	34.2538	286.185	0	21.1861	3.45654	3.02128	0	0	0.0527348	0.687971	825.152	708.463	70.344
CH4	EU+_South	MLT	2002	0.0698523	0.00165911	0.0383131	0	0	0.0764677	0.017655	0	0	0	4.91e-07	0.000333398	6.17059	1.70681	0.0116007
CH4	EU+_South	PRT	2002	0.511321	3.0785	12.4219	2.14754	0.0931568	2.16362	0.768529	0.0707231	0	0	0.0304631	0.0542358	247.358	173.041	5.02097
CH4	EU+_WestCentral	AUT	2002	0.369573	2.1093	13.5215	13.2644	0	0.952046	0.143883	0.00623621	0	0	0.00414868	0.146756	105.748	187.456	0.00100863
CH4	EU+_WestCentral	BEL	2002	1.44822	2.86415	7.98014	25.5728	0	1.30791	0.727358	0.0459339	0	0	0.00216013	0.408486	118.432	246.136	0.00593969
CH4	EU+_WestCentral	CHE	2002	0.0290763	0.368073	4.50865	11.6071	0	1.84136	0.0396902	0	0	0	0.00623285	0.377014	28.971	163.308	0.16821
CH4	EU+_WestCentral	DEU	2002	12.952	36.0959	34.5734	776.203	0.830201	14.5585	0.953826	0.00309264	0	0	0.0835942	2.3182	985.936	1379.06	2.47903
CH4	EU+_WestCentral	FRA	2002	0.635338	14.0143	114.703	107.532	0.054865	15.3548	4.8087	0.173043	0	0	0.0806817	1.02188	784.694	1648.08	5.20719
CH4	EU+_WestCentral	GBR	2002	4.27629	9.31606	33.7005	572.84	0	16.3754	3.00312	0.0329824	0	0	0.207276	1.57021	2334.52	1067.11	10.155
CH4	EU+_WestCentral	IRL	2002	0.424186	0.352612	7.82661	3.08412	0	1.15061	0.343735	0.000930751	0	0	0.00173568	0.0510993	60.4286	497.13	0.246225
CH4	EU+_WestCentral	LUX	2002	0.0597508	0.063252	0.392329	1.90649	0	0.0596922	0.00490411	0.00021274	0	0	4.33e-06	0.0211818	3.77158	17.1392	0
CH4	EU+_WestCentral	NLD	2002	3.90919	16.162	32.8708	34.9255	1.80676	2.94826	0.431241	0.0671137	0	0	0.000326643	0.352011	343.606	461.882	0.00437071
CH4	NON_EU	ALB	2002	0.00739594	0.0727735	1.1422	4.64266	0	0.157638	0.244027	0	0	0	0	0.0124628	40.6765	72.9433	0.573345
CH4	NON_EU	BIH	2002	0.197286	0.914818	6.62373	29.7395	0	0.323316	0.369895	0	0	0	0	0.000924963	64.7962	43.1297	0.0190518
CH4	NON_EU	BLR	2002	66.2871	4.28442	33.0315	54.177	0	3.52012	0.823072	0.277869	0	0	0	0.350986	199.571	285.353	0.906307
CH4	NON_EU	KOS	2002	0.0378802	0.00717911	1.75553	5.54588	0	0.0416772	0.206401	0	0	0	0	0.0312541	21.1259	20.171	0.0654486
CH4	NON_EU	MDA	2002	9.3284	1.33186	9.39694	2.7852	0	0.240167	0.0729077	0.267614	0	0	0	0.0207136	51.0694	36.7016	0.636555
CH4	NON_EU	MKD	2002	0.275474	0.25277	2.07102	6.203	0	0.108619	0.0895215	0.00835534	0	0	0	0.000947643	24.3321	26.9651	0.075647
CH4	NON_EU	MNE	2002	0.00786192	0.00628172	0.622402	1.11795	0	0.0317541	0.0330772	0	0	0	0	0.0102384	10.6864	8.57133	0.419531
CH4	NON_EU	RUS	2002	881.701	148.34	1086.13	8646.5	0	43.6587	4.93811	0.628992	0	0	0.0615796	0.882267	3361.63	1606.91	50.7703
CH4	NON_EU	SRB	2002	2.93178	2.49384	13.8823	62.299	0	0.560327	0.229556	0.0734313	0	0	0	0.134177	89.4566	102.25	0.58859
CH4	NON_EU	TUR	2002	19.6555	7.13979	79.709	96.2387	0	4.29933	4.66866	0.076176	0	0	0.0176821	1.2521	861.588	789.601	41.7828
CH4	NON_EU	UKR	2002	71.143	18.2209	169.699	1795.62	0	10.9861	1.3418	0.5082	0	0	0.00574196	0.309384	707.495	634.917	47.0774
CH4	EU+_East	BGR	2003	0.279077	2.93559	11.9256	54.5245	0	0.809009	0.292243	0.277604	0	0	0.00183235	0.0489554	228.265	85.169	4.11819
CH4	EU+_East	CZE	2003	0.943756	3.98713	29.7351	235.505	0	2.16738	0.520305	0.0954012	0	0	7.75e-05	0.129941	156.243	158.669	0.016026
CH4	EU+_East	HUN	2003	0.406983	1.5107	19.5502	54.4542	0	1.60533	0.456702	0.121346	0	0	2.786e-05	0.1074	164.333	111.497	0.829958
CH4	EU+_East	POL	2003	1.96411	5.93637	115.738	799.831	0	4.58347	1.03286	0.780156	0	0	0.000443196	0.464439	653.298	550.904	0.359183
CH4	EU+_East	ROU	2003	0.538291	5.18314	36.3473	708.607	0	2.16108	0.487384	0.0420559	0	0	0.00222655	0.0339244	204.533	623.89	3.49992
CH4	EU+_East	SVK	2003	0.177631	2.05699	6.98756	82.8087	0	0.669245	0.267101	0.0682228	0	0	6.382e-05	0.0696176	51.771	56.4639	0.00851729
CH4	EU+_East	SVN	2003	0.069085	0.597291	5.46406	15.1987	0	0.573813	0.0874194	0	0	0	1.68e-05	0.0460754	34.2927	47.3818	0.0432541
CH4	EU+_North	DNK	2003	14.3399	0.976917	8.85142	9.4546	0.174075	1.36608	0.398261	2.35e-05	0	0	0.0027068	0.348327	49.946	235.649	0.0142328
CH4	EU+_North	EST	2003	0.283849	0.0602273	4.68771	1.07774	0	0.326508	0.077289	1.1e-05	0	0	7.15e-05	0.0251188	20.3627	22.3268	0.301494
CH4	EU+_North	FIN	2003	1.27619	0.654024	7.34309	2.79147	0.00562	1.21642	0.296212	0.00399633	0	0	0.004681	0.456753	124.424	101.696	0.00836908
CH4	EU+_North	ISL	2003	0.00160837	0.131238	0.0021712	0.0597323	0.00170903	0.07853	0.0122143	0	0	0	0.0001543	0.00927066	10.8584	13.0778	0
CH4	EU+_North	LTU	2003	0.252062	0.248338	6.84207	12.6235	0	0.960768	0.317268	0.932349	0	0	2.75e-05	0.034594	60.3035	80.6683	0.082147
CH4	EU+_North	LVA	2003	0.184512	0.145188	8.04883	4.76311	0	0.301799	0.116446	0.0187374	0	0	1.541e-05	0.0689891	23.0683	33.9929	0.427776
CH4	EU+_North	NOR	2003	0.302072	1.39599	8.75841	43.6122	0	1.35267	0.0526614	0.00119258	0	0	0.0346099	1.03291	63.217	103.432	0.011319
CH4	EU+_North	SWE	2003	1.38103	1.30185	4.22617	3.84165	0	2.45256	0.101631	0.015917	0	0	0.0143669	0.473752	102.098	136.865	0.0121035
CH4	EU+_South	CYP	2003	0.122	0.054361	0.15688	0.0100901	0	0.172552	0.0738869	0	0	0	0.00012	0	18.4893	13.9807	0.0184915
CH4	EU+_South	ESP	2003	1.37575	48.8317	32.7993	49.7817	0	6.34508	2.53485	0.150274	0	0	0.0532778	0.482334	471.572	1101.47	20.4506
CH4	EU+_South	GRC	2003	0.666756	0.568284	3.46239	61.9837	0	4.21583	0.532674	0.0509845	0	0	0.00369487	0.331843	173.289	193.712	5.19373
CH4	EU+_South	HRV	2003	0.180509	0.356619	14.9202	10.431	0	0.942886	0.175115	0.00893439	0	0	0.0002421	0.0578712	55.1245	67.8916	0.00874143
CH4	EU+_South	ITA	2003	4.14713	12.1027	52.3573	281.101	0	19.4064	3.30118	2.7946	0	0	0.0553712	0.598182	817.784	711.015	71.8187
CH4	EU+_South	MLT	2003	0.0722644	0.00165911	0.0383748	0	0	0.0741383	0.0171172	0	0	0	4.91e-07	0.000333398	6.33018	1.70816	0.0116007
CH4	EU+_South	PRT	2003	0.476903	3.20521	12.0125	2.23284	0.073749	1.97961	0.73442	0.0867206	0	0	0.0326207	0.0437442	252.727	168.655	5.41516
CH4	EU+_WestCentral	AUT	2003	0.432264	2.15778	13.2327	13.2548	0	0.91569	0.146043	0.00667091	0	0	0.00406072	0.147527	105.588	185.362	0.00100863
CH4	EU+_WestCentral	BEL	2003	1.59981	2.98377	8.71201	24.6347	0	1.2702	0.664382	0.0407845	0	0	0.00244451	0.405535	103.681	237.904	0.00593969
CH4	EU+_WestCentral	CHE	2003	0.0297201	0.365612	4.62848	11.0698	0	1.62942	0.0385569	0	0	0	0.00603704	0.350772	27.9429	161.789	0.16821
CH4	EU+_WestCentral	DEU	2003	30.3119	34.1927	32.5852	703.69	0.905571	12.9225	0.869933	0.00304052	0	0	0.0805051	2.31717	926.544	1362.04	2.91555
CH4	EU+_WestCentral	FRA	2003	0.683397	13.5423	116.576	104.166	0.0485619	13.7193	4.45277	0.175455	0	0	0.0759033	1.07041	785.72	1603.46	5.04156
CH4	EU+_WestCentral	GBR	2003	4.62783	10.196	31.6765	511.634	0	14.1876	2.87903	0.0311582	0	0	0.201716	1.56417	2184.76	1075.61	8.49428
CH4	EU+_WestCentral	IRL	2003	0.397422	0.36766	7.43324	29.8865	0	1.08283	0.33804	0.00080798	0	0	0.00181537	0.0520031	60.7212	494.643	0.246225
CH4	EU+_WestCentral	LUX	2003	0.0613906	0.0582765	0.39192	1.93204	0	0.0543861	0.00469476	0.000150563	0	0	5.05e-06	0.0204557	3.87638	16.5989	0
CH4	EU+_WestCentral	NLD	2003	3.68984	16.2412	33.3504	34.6159	1.85186	2.89123	0.415347	0.0551692	0	0	0.000373883	0.326423	321.379	453.396	0.00437071
CH4	NON_EU	ALB	2003	0.00693062	0.0765156	1.14224	4.92244	0	0.164092	0.254018	0	0	0	0	0.0116418	40.232	71.4606	0.573345
CH4	NON_EU	BIH	2003	0.226191	1.05221	6.6442	29.7833	0	0.29421	0.336597	0	0	0	0	0.000949975	60.7444	43.5324	0.0190518
CH4	NON_EU	BLR	2003	68.4807	4.44462	33.9066	56.0784	0	3.23774	0.757048	0.255579	0	0	0	0.327991	190.532	281.498	0.906307
CH4	NON_EU	KOS	2003	0.0429201	0.00745274	1.75499	5.55259	0	0.0487848	0.241601	0	0	0	0	0.0401694	20.1293	19.402	0.0654486
CH4	NON_EU	MDA	2003	9.28694	1.41258	10.0537	2.9098	0	0.253444	0.0769385	0.282409	0	0	0	0.0178091	54.1579	35.3584	0.636555
CH4	NON_EU	MKD	2003	0.255983	0.258513	2.07112	6.203	0	0.102746	0.084681	0.00790356	0	0	0	0.000965095	23.7458	26.5764	0.075647
CH4	NON_EU	MNE	2003	0.00890795	0.00652115	0.62201	1.1193	0	0.0371694	0.0387181	0	0	0	0	0.0131589	10.1823	8.24455	0.419531
CH4	NON_EU	RUS	2003	892.017	152.633	1062.53	8890.27	0	41.6692	4.71307	0.600328	0	0	0.0650531	0.912511	3307.28	1552.47	50.7703
CH4	NON_EU	SRB	2003	3.32185	2.58889	13.687	62.3744	0	0.655885	0.268704	0.0859542	0	0	0	0.172451	85.2364	98.3514	0.58859
CH4	NON_EU	TUR	2003	21.6683	7.7452	83.7937	96.0981	0	4.10788	4.46078	0.072784	0	0	0.0187881	1.24274	889.888	767.372	41.9521
CH4	NON_EU	UKR	2003	69.7843	24.0153	171.335	1823.51	0	11.1504	1.36187	0.5158	0	0	0.00616131	0.311923	690.51	592.587	47.059
CH4	EU+_East	BGR	2004	0.273908	2.62585	11.1968	39.1724	0	0.653023	0.316521	0.299732	0	0	0.00151569	0.0485843	222.527	83.7625	4.13091
CH4	EU+_East	CZE	2004	1.02984	4.49142	29.6502	225.136	0	2.03712	0.52765	0.0691587	0	0	8.32e-05	0.130397	154.385	153.766	0.016026
CH4	EU+_East	HUN	2004	0.564901	1.59998	17.7599	45.8427	0	1.53479	0.463886	0.109525	0	0	5.49e-05	0.10307	159.196	106.91	0.898539
CH4	EU+_East	POL	2004	2.03311	6.12843	120.022	808.204	0	4.47636	1.19156	0.962522	0	0	0.000414831	0.474556	644.337	534.898	0.359183
CH4	EU+_East	ROU	2004	0.51912	5.27615	37.1299	693.122	0	2.18576	0.492949	0.0425361	0	0	0.00222655	0.0320699	201.788	592.419	3.50692
CH4	EU+_East	SVK	2004	0.18518	2.0953	7.90903	86.5241	0	0.61319	0.300631	0.0524153	0	0	8.522e-05	0.0993045	52.59	51.3463	0.00851729
CH4	EU+_East	SVN	2004	0.0694224	0.496033	5.70317	15.1037	0	0.47804	0.0910445	0	0	0	1.32e-05	0.0375942	33.3627	46.5151	0.0432541
CH4	EU+_North	DNK	2004	14.0167	0.986107	8.97796	10.27	0.157745	1.21737	0.405506	2.062e-05	0	0	0.00284015	0.348223	44.5537	233.448	0.0142328
CH4	EU+_North	EST	2004	0.313399	0.0698363	4.81396	1.27163	0	0.285595	0.0811773	8e-06	0	0	5.87e-05	0.0270112	20.2481	22.6822	0.301494
CH4	EU+_North	FIN	2004	1.17383	0.667678	7.14212	2.50593	0.00513	1.1004	0.286887	0.00411601	0	0	0.004763	0.464365	117.886	101.335	0.00836908
CH4	EU+_North	ISL	2004	0.00162388	0.131697	0.00249369	0.0650354	0.00181233	0.0810999	0.0133521	0	0	0	0.0001635	0.0111271	11.1878	12.8955	0
CH4	EU+_North	LTU	2004	0.261463	0.285589	6.91379	11.5845	0	0.786831	0.25983	0.763558	0	0	2.75e-05	0.0347313	58.5293	80.3658	0.082147
CH4	EU+_North	LVA	2004	0.180116	0.185998	8.28647	4.71477	0	0.27005	0.119617	0.0201736	0	0	8.795e-05	0.0750147	22.7807	32.8916	0.427776
CH4	EU+_North	NOR	2004	0.313413	1.29244	8.2001	45.3348	0	1.24594	0.0518881	0.00129186	0	0	0.0349609	1.04656	62.6377	102.268	0.011319
CH4	EU+_North	SWE	2004	1.37032	1.29527	4.4706	4.34114	0	2.22349	0.100587	0.0174208	0	0	0.0172991	0.478771	101.001	138.772	0.0121035
CH4	EU+_South	CYP	2004	0.128	0.053592	0.1539	0.0072319	0	0.174689	0.069476	0	0	0	0.0001	0	18.5794	13.6695	0.0184915
CH4	EU+_South	ESP	2004	1.53402	51.8194	33.9885	48.3591	0	5.56315	2.51348	0.161986	0	0	0.0590458	0.464005	455.87	1101.84	21.2538
CH4	EU+_South	GRC	2004	0.657803	0.573748	3.94265	63.7095	0	4.24277	0.53381	0.0473349	0	0	0.00426789	0.297796	173.576	192.505	5.22481
CH4	EU+_South	HRV	2004	0.142046	0.42146	14.5379	10.3604	0	0.863894	0.18522	0.0111445	0	0	0.00026408	0.0570016	57.5266	73.0026	0.00874143
CH4	EU+_South	ITA	2004	4.08505	12.3377	36.0955	270.466	0	17.2606	3.19722	2.35519	0	0	0.0534443	0.675287	793.879	695.626	74.845
CH4	EU+_South	MLT	2004	0.0746764	0.00165911	0.0384365	0	0	0.0718089	0.0165794	0	0	0	4.91e-07	0.000333398	6.48977	1.70952	0.0116007
CH4	EU+_South	PRT	2004	0.5072	3.56153	11.6027	2.36137	0.090402	1.81281	0.692303	0.0778432	0	0	0.0272313	0.0413533	252.405	169.537	6.03578
CH4	EU+_WestCentral	AUT	2004	0.472283	2.20661	12.7881	12.0277	0	0.852333	0.142281	0.00535641	0	0	0.00435042	0.143358	107.502	185.131	0.00100863
CH4	EU+_WestCentral	BEL	2004	1.38563	3.61463	9.13327	24.2996	0	1.11528	0.638593	0.0385081	0	0	0.00243668	0.402664	103.156	236.075	0.00593969
CH4	EU+_WestCentral	CHE	2004	0.0247932	0.394639	4.49861	10.6245	0	1.49317	0.0368107	0	0	0	0.00611525	0.325092	28.556	160.551	0.16821
CH4	EU+_WestCentral	DEU	2004	30.3415	35.3428	29.8922	597.816	0.950019	11.82	0.83956	0.00506289	0	0	0.0760937	2.30506	870.4	1322.36	3.74832
CH4	EU+_WestCentral	FRA	2004	0.72223	15.4234	111.371	84.7175	0.0428711	12.4744	4.25251	0.167026	0	0	0.0764564	1.16441	779.785	1576.34	5.76489
CH4	EU+_WestCentral	GBR	2004	4.6553	9.72714	30.4762	500.002	0	12.6119	2.73585	0.0259582	0	0	0.187061	1.6245	2017.44	1085.32	8.47325
CH4	EU+_WestCentral	IRL	2004	0.350959	0.402016	7.28754	3.44568	0	1.03877	0.345098	0.000722789	0	0	0.00175094	0.0508129	49.9055	493.582	0.246225
CH4	EU+_WestCentral	LUX	2004	0.0673195	0.0650254	0.407691	2.14413	0	0.0504064	0.00456971	0.000118978	0	0	4.43e-06	0.0193163	3.68653	16.4265	0
CH4	EU+_WestCentral	NLD	2004	3.99401	16.2689	33.1192	32.5471	1.7732	2.70167	0.399559	0.0534864	0	0	0.000295228	0.310143	308.332	453.263	0.00437071
CH4	NON_EU	ALB	2004	0.00646531	0.0802578	1.14227	5.20222	0	0.170546	0.264009	0	0	0	0	0.0108209	39.7875	69.9778	0.573345
CH4	NON_EU	BIH	2004	0.255095	1.1923	6.66468	29.8272	0	0.265105	0.303298	0	0	0	0	0.000974988	56.6927	43.9352	0.0190518
CH4	NON_EU	BLR	2004	70.6744	4.60481	34.7817	57.9797	0	2.95537	0.691024	0.23329	0	0	0	0.304995	181.493	277.644	0.906307
CH4	NON_EU	KOS	2004	0.0479601	0.00772637	1.75446	5.55929	0	0.0558924	0.2768	0	0	0	0	0.0490847	19.1326	18.633	0.0654486
CH4	NON_EU	MDA	2004	9.24547	1.49329	10.7105	3.0344	0	0.266722	0.0809692	0.297205	0	0	0	0.0149045	57.2465	34.0152	0.636555
CH4	NON_EU	MKD	2004	0.236491	0.264257	2.07121	6.203	0	0.0968731	0.0798405	0.00745178	0	0	0	0.000982548	23.1594	26.1877	0.075647
CH4	NON_EU	MNE	2004	0.00995397	0.00676057	0.621617	1.12065	0	0.0425847	0.0443591	0	0	0	0	0.0160795	9.67814	7.91778	0.419531
CH4	NON_EU	RUS	2004	902.332	156.927	1038.92	9134.04	0	39.6796	4.48804	0.571664	0	0	0.0685265	0.942756	3252.94	1498.03	50.7703
CH4	NON_EU	SRB	2004	3.71193	2.68395	13.4917	62.4497	0	0.751442	0.307852	0.0984771	0	0	0	0.210726	81.0162	94.4532	0.58859
CH4	NON_EU	TUR	2004	23.6812	8.3506	87.8784	95.9576	0	3.91644	4.25289	0.069392	0	0	0.019894	1.23337	918.188	745.143	42.1213
CH4	NON_EU	UKR	2004	68.4257	29.8096	172.97	1851.4	0	11.3147	1.38193	0.5234	0	0	0.00658065	0.314461	673.526	550.258	47.0407
CH4	EU+_East	BGR	2005	0.279427	2.51597	10.8222	41.4811	0	0.598798	0.340585	0.367177	0	0	0.00109011	0.0556599	207.095	80.6576	3.71018
CH4	EU+_East	CZE	2005	0.823185	4.70712	27.5565	243.632	0	1.89487	0.577896	0.0582059	0	0	6.23e-05	0.127212	157.165	149.649	0.016026
CH4	EU+_East	HUN	2005	0.922364	2.28576	17.0092	41.6061	0	1.48854	0.509364	0.0947732	0	0	7.94e-05	0.0985798	158.297	104.374	0.858308
CH4	EU+_East	POL	2005	2.28335	5.41901	127.855	813.689	0	4.26228	1.47084	1.09918	0	0	0.000537034	0.48657	634.602	547.555	0.359183
CH4	EU+_East	ROU	2005	0.499948	5.36916	37.9124	677.637	0	2.21044	0.498514	0.0430163	0	0	0.00222655	0.0302155	199.044	560.948	3.51392
CH4	EU+_East	SVK	2005	0.175023	2.14879	10.8033	84.3443	0	0.652681	0.358291	0.0459824	0	0	0.000158116	0.0940517	53.3698	51.1845	0.00851729
CH4	EU+_East	SVN	2005	0.0840881	0.560091	5.83885	14.4299	0	0.43774	0.0915067	0	0	0	1.927e-05	0.037239	32.2511	47.196	0.0432541
CH4	EU+_North	DNK	2005	12.3753	0.845946	9.13933	9.608	0.145722	1.06286	0.398299	1.75e-05	0	0	0.0032099	0.348115	43.7665	227.232	0.0142328
CH4	EU+_North	EST	2005	0.350935	0.0735427	4.16181	1.31171	0	0.282367	0.0816994	8e-06	0	0	6.62e-05	0.0178877	19.0698	22.9715	0.301494
CH4	EU+_North	FIN	2005	0.957745	0.616661	6.88861	2.89014	0.00468	1.00385	0.270668	0.00395449	0	0	0.004756	0.475916	107.922	101.416	0.00836908
CH4	EU+_North	ISL	2005	0.00168766	0.12047	0.0023738	0.0695039	0.00145467	0.0670195	0.0139992	0	0	0	0.0001822	0.0120955	10.7183	13.0142	0
CH4	EU+_North	LTU	2005	0.270864	0.32284	6.9855	10.5454	0	0.612895	0.202392	0.594766	0	0	2.75e-05	0.0348685	56.755	80.0632	0.082147
CH4	EU+_North	LVA	2005	0.164036	0.225115	8.16247	5.32724	0	0.236149	0.12205	0.0210805	0	0	7.82e-05	0.0862588	23.2304	33.9062	0.427776
CH4	EU+_North	NOR	2005	0.319098	1.35329	8.17725	40.401	0	1.1676	0.0532725	0.00133755	0	0	0.0298864	1.02656	59.1259	102.683	0.011319
CH4	EU+_North	SWE	2005	1.51046	1.25259	4.34474	3.98015	0	2.09144	0.093435	0.0199244	0	0	0.0171076	0.481418	94.8344	137.817	0.0121035
CH4	EU+_South	CYP	2005	0.136	0.053818	0.15556	0.00626	0	0.175909	0.0675295	0	0	0	8.7e-05	0	18.8615	12.696	0.0184915
CH4	EU+_South	ESP	2005	1.75723	54.7757	34.5286	46.5823	0	5.13209	2.44697	0.159303	0	0	0.0622107	0.454892	465.938	1052.54	20.6029
CH4	EU+_South	GRC	2005	0.677948	0.68005	3.42271	63.3539	0	4.1258	0.548802	0.0512748	0	0	0.00349692	0.294574	177.644	192.464	5.29701
CH4	EU+_South	HRV	2005	0.132658	0.395133	15.4105	10.393	0	0.805668	0.174706	0.0144439	0	0	0.00026408	0.059954	57.5043	70.5555	0.00874143
CH4	EU+_South	ITA	2005	4.05459	13.4507	58.6254	270.742	0	14.2096	3.06012	2.16601	0	0	0.0527686	0.700408	796.283	696.497	71.9079
CH4	EU+_South	MLT	2005	0.0770884	0.00165911	0.0384982	0	0	0.0694796	0.0160416	0	0	0	4.91e-07	0.000333398	6.64936	1.71087	0.0116007
CH4	EU+_South	PRT	2005	0.560965	3.5559	11.1847	2.34242	0.105628	1.63376	0.648807	0.0637902	0	0	0.0268309	0.05814	248.026	172.382	6.30859
CH4	EU+_WestCentral	AUT	2005	0.502165	2.34597	10.2143	11.0816	0	0.789545	0.138141	0.0051047	0	0	0.00415053	0.143063	101.632	182.965	0.00100863
CH4	EU+_WestCentral	BEL	2005	1.35344	4.97378	9.61227	24.9906	0	0.978348	0.570798	0.0353183	0	0	0.00218124	0.400658	94.2624	233.048	0.00593969
CH4	EU+_WestCentral	CHE	2005	0.0240491	0.394932	4.45758	10.1809	0	1.39441	0.0377507	0	0	0	0.00582125	0.299457	28.2891	162.058	0.16821
CH4	EU+_WestCentral	DEU	2005	33.3444	36.4532	29.6303	526.264	1.02986	10.3281	0.832004	0.0296526	0	0	0.081726	2.30876	811.563	1316.54	9.86274
CH4	EU+_WestCentral	FRA	2005	0.816928	13.7548	101.899	71.2955	0.0364885	10.8956	4.02251	0.158654	0	0	0.0766942	1.3518	769.342	1570.29	5.15154
CH4	EU+_WestCentral	GBR	2005	5.41157	8.74275	27.1453	433.031	0	11.4572	2.63846	0.0222903	0	0	0.178905	1.59496	1913.59	1072.67	8.52174
CH4	EU+_WestCentral	IRL	2005	0.356274	0.460452	7.62322	3.18448	0	1.05159	0.345866	0.000587134	0	0	0.00199878	0.0535355	42.6654	487.844	0.246225
CH4	EU+_WestCentral	LUX	2005	0.0651844	0.0922378	0.391001	2.11184	0	0.0450423	0.00422786	8.18798e-05	0	0	4.38e-06	0.0174476	3.67319	16.4509	0
CH4	EU+_WestCentral	NLD	2005	4.30867	16.1899	34.8666	34.3994	1.76582	2.63266	0.381722	0.0495595	0	0	0.000307222	0.304677	248.224	450.789	0.00437071
CH4	NON_EU	ALB	2005	0.006	0.084	1.14231	5.482	0	0.177	0.274	0	0	0	0	0.01	39.343	68.495	0.573345
CH4	NON_EU	BIH	2005	0.284	1.33	6.68516	29.871	0	0.236	0.27	0	0	0	0	0.001	52.641	44.338	0.0190518
CH4	NON_EU	BLR	2005	72.868	4.765	35.6568	59.881	0	2.673	0.625	0.211	0	0	0	0.282	172.454	273.789	0.906307
CH4	NON_EU	KOS	2005	0.053	0.008	1.75393	5.566	0	0.063	0.312	0	0	0	0	0.058	18.136	17.864	0.0654486
CH4	NON_EU	MDA	2005	9.204	1.574	11.3672	3.159	0	0.28	0.085	0.312	0	0	0	0.012	60.335	32.672	0.636555
CH4	NON_EU	MKD	2005	0.217	0.27	2.07131	6.203	0	0.091	0.075	0.007	0	0	0	0.001	22.573	25.799	0.075647
CH4	NON_EU	MNE	2005	0.011	0.007	0.621225	1.122	0	0.048	0.05	0	0	0	0	0.019	9.174	7.591	0.419531
CH4	NON_EU	RUS	2005	912.648	161.22	1015.32	9377.81	0	37.69	4.263	0.543	0	0	0.072	0.973	3198.6	1443.59	50.7703
CH4	NON_EU	SRB	2005	4.102	2.779	13.2965	62.525	0	0.847	0.347	0.111	0	0	0	0.249	76.796	90.555	0.58859
CH4	NON_EU	TUR	2005	25.694	8.956	91.9631	95.817	0	3.725	4.045	0.066	0	0	0.021	1.224	946.488	722.914	42.2906
CH4	NON_EU	UKR	2005	67.067	35.604	174.606	1879.3	0	11.479	1.402	0.531	0	0	0.007	0.317	656.541	507.928	47.0223
CH4	EU+_East	BGR	2006	0.276227	3.03516	11.5385	36.7492	0	0.634086	0.329104	0.384849	0	0	0.000958158	0.0594051	200.389	79.4085	3.72383
CH4	EU+_East	CZE	2006	0.834945	4.67759	28.8418	251.794	0	1.75558	0.50556	0.0502842	0	0	6.67e-05	0.121454	159.416	147.517	0.016026
CH4	EU+_East	HUN	2006	0.824642	2.25778	17.6047	40.7103	0	1.29181	0.510242	0.098184	0	0	6.22e-05	0.0994528	155.334	101.59	0.789997
CH4	EU+_East	POL	2006	2.43068	6.44227	141.504	808.106	0	4.10764	1.65199	1.27462	0	0	0.000630112	0.371768	622.791	560.651	0.359183
CH4	EU+_East	ROU	2006	0.530275	5.66629	35.9049	636.256	0	1.93605	0.505661	0.0136906	0	0	0.00257542	0.0448968	193.729	584.423	3.96818
CH4	EU+_East	SVK	2006	0.171185	3.23632	10.4301	76.8236	0	0.490288	0.328867	0.0449944	0	0	0.000219424	0.0787586	55.0113	49.8294	0.00851729
CH4	EU+_East	SVN	2006	0.088517	0.509635	5.98267	14.3037	0	0.392951	0.0858266	0	0	0	1.411e-05	0.0447061	31.113	47.0154	0.0432541
CH4	EU+_North	DNK	2006	11.4589	0.707871	8.84498	9.28599	0.173352	0.93223	0.395296	1.6167e-05	0	0	0.00311474	0.354174	46.0447	222.94	0.0142328
CH4	EU+_North	EST	2006	0.273988	0.0777365	4.01702	1.32792	0	0.277802	0.0762008	4.05e-06	0	0	6.75e-05	0.0178832	18.4763	23.1576	0.301494
CH4	EU+_North	FIN	2006	1.17721	0.663241	6.91144	2.48693	0.00514	0.90137	0.254772	0.00452103	0	0	0.004691	0.483632	110.864	101.322	0.00836908
CH4	EU+_North	ISL	2006	0.00270829	0.119104	0.00168061	0.0966502	0.00154497	0.0782459	0.0192025	0	0	0	0.0001972	0.0109449	12.1189	13.3002	0
CH4	EU+_North	LTU	2006	0.297538	0.344568	7.32504	9.94054	0	0.591115	0.20277	0.60822	0	0	1.6e-05	0.0335751	55.4285	81.5961	0.082147
CH4	EU+_North	LVA	2006	0.18057	0.239721	7.82212	3.82093	0	0.222527	0.122538	0.0223879	0	0	8.87e-05	0.0946547	23.0962	34.1944	0.427776
CH4	EU+_North	NOR	2006	0.315559	1.31397	8.2873	37.0729	0	1.06486	0.0525556	0.00169443	0	0	0.0323716	1.02891	59.8591	100.534	0.011319
CH4	EU+_North	SWE	2006	1.64453	1.34697	4.31719	3.83076	0	1.90499	0.0999498	0.0209334	0	0	0.0146141	0.495784	91.3899	136.876	0.0121035
CH4	EU+_South	CYP	2006	0.139	0.049355	0.1702	0.00636	0	0.169339	0.0623241	0	0	0	7.4e-05	0	18.8112	12.7916	0.0184915
CH4	EU+_South	ESP	2006	1.67934	41.6162	35.5098	46.4735	0	4.60352	2.18959	0.174007	0	0	0.0642318	0.447092	476.607	1016.86	18.8192
CH4	EU+_South	GRC	2006	0.665822	0.668545	3.7981	59.4831	0	4.02514	0.548549	0.0530475	0	0	0.0038682	0.292361	184.3	193.212	5.13701
CH4	EU+_South	HRV	2006	0.144341	0.399712	14.1232	11.1399	0	0.746314	0.180794	0.0234872	0	0	0.00028606	0.0649947	61.2917	71.9288	0.00874143
CH4	EU+_South	ITA	2006	4.13578	13.267	68.6902	244.208	0	12.6337	2.70316	1.86402	0	0	0.055124	0.657817	773.411	686.635	72.0158
CH4	EU+_South	MLT	2006	0.0776389	0.00144593	0.038139	0	0	0.0665272	0.0159145	0	0	0	9.47e-07	0.000332586	6.98658	1.68427	0.0116007
CH4	EU+_South	PRT	2006	0.511202	3.46088	10.7472	2.39077	0.0846924	1.45201	0.634072	0.061456	0	0	0.024663	0.0555112	244.526	173.34	6.19927
CH4	EU+_WestCentral	AUT	2006	0.595728	2.83683	10.4347	11.3997	0	0.703169	0.123502	0.00460211	0	0	0.00493536	0.142877	96.7324	182.844	0.00100863
CH4	EU+_WestCentral	BEL	2006	1.26466	5.88928	9.99509	24.8142	0	0.87366	0.524835	0.0328224	0	0	0.00228321	0.40251	90.9303	231.676	0.00593969
CH4	EU+_WestCentral	CHE	2006	0.0211101	0.381329	4.17185	9.83	0	1.25035	0.0360429	0	0	0	0.00546055	0.278621	28.1742	163.496	0.16821
CH4	EU+_WestCentral	DEU	2006	39.592	36.33	32.2986	454.525	0.968529	9.25461	0.860285	0.0438573	0	0	0.0832779	2.31303	748.168	1288.63	13.5956
CH4	EU+_WestCentral	FRA	2006	0.802246	11.4789	85.067	67.1828	0.0309348	9.38065	3.80105	0.164687	0	0	0.0747997	1.03104	759.819	1575.93	4.47779
CH4	EU+_WestCentral	GBR	2006	5.36581	8.7243	26.4392	401.809	0	10.2562	2.47379	0.0182671	0	0	0.155561	1.65047	1790.99	1053.7	9.48764
CH4	EU+_WestCentral	IRL	2006	0.337644	0.441945	7.41502	3.0425	0	0.992261	0.330593	0.000502322	0	0	0.00241483	0.0517016	44.1591	484.711	0.246225
CH4	EU+_WestCentral	LUX	2006	0.068091	0.0972503	0.384498	2.21637	0	0.0411311	0.0039653	9.08582e-05	0	0	3.73e-06	0.0159087	3.66457	16.2363	0
CH4	EU+_WestCentral	NLD	2006	4.07192	15.0418	40.346	31.3547	1.79135	2.63245	0.37918	0.0484948	0	0	0.000269843	0.285025	230.111	450.697	0.00437071
CH4	NON_EU	ALB	2006	0.2308	0.0708	1.13991	6.5234	0	0.1704	0.273	0.002	0	0	0	0.0116	39.9696	68.621	0.573345
CH4	NON_EU	BIH	2006	0.929	1.5408	6.72536	28.2266	0	0.2484	0.2978	0.0372	0	0	0	0.0042	52.6776	44.6894	0.0190518
CH4	NON_EU	BLR	2006	64.2588	4.6864	36.6752	62.1804	0	2.7558	0.7294	0.1968	0	0	0	0.2672	171.22	276.637	0.906307
CH4	NON_EU	KOS	2006	0.3624	0.0082	1.75893	5.3842	0	0.0646	0.3108	0.032	0	0	0	0.0558	18.2384	17.9124	0.0654486
CH4	NON_EU	MDA	2006	8.769	1.573	11.389	2.8464	0	0.2814	0.097	0.2516	0	0	0	0.0146	59.4708	32.2988	0.636555
CH4	NON_EU	MKD	2006	0.573	0.2466	2.15891	6.4148	0	0.0964	0.079	0.059	0	0	0	0.0028	22.7784	25.0398	0.075647
CH4	NON_EU	MNE	2006	0.1196	0.006	0.621225	1.109	0	0.0518	0.0542	0.0042	0	0	0	0.0182	9.2736	7.4262	0.419531
CH4	NON_EU	RUS	2006	933.453	161.036	1001.66	9219.18	0	36.1352	4.5806	0.6128	0	0	0.0712	0.9324	3256.94	1343.16	50.7703
CH4	NON_EU	SRB	2006	5.511	3.0458	13.0731	58.0416	0	0.7698	0.3528	0.2056	0	0	0	0.2422	77.0734	89.0542	0.58859
CH4	NON_EU	TUR	2006	27.8634	12.4928	89.7201	93.729	0	3.1986	4.2082	0.9044	0	0	0.019	1.114	940.874	769.831	42.2906
CH4	NON_EU	UKR	2006	64.4428	36.9842	172.361	1754.46	0	10.7372	1.4674	0.5198	0	0	0.0056	0.3474	647.253	505.023	47.0223
CH4	EU+_East	BGR	2007	0.311432	2.53849	10.681	43.2245	0	0.593	0.292888	0.347136	0	0	0.0013177	0.05486	196.19	75.5877	4.46035
CH4	EU+_East	CZE	2007	0.921939	4.32492	28.3267	235.018	0	1.72191	0.444124	0.050306	0	0	6.67e-05	0.128639	158.692	148.486	0.016026
CH4	EU+_East	HUN	2007	0.932658	2.47661	17.107	38.3353	0	1.21501	0.494465	0.0926204	0	0	3.23e-05	0.0964213	155.944	102.165	0.845348
CH4	EU+_East	POL	2007	2.51833	6.69487	130.265	788.733	0	3.97262	1.79404	1.30897	0	0	0.000630121	0.343582	614.589	566.654	0.359183
CH4	EU+_East	ROU	2007	0.533312	4.03999	37.1338	576.496	0	1.73271	0.451516	0.0262811	0	0	0.00388361	0.0715457	198.839	582.844	4.71637
CH4	EU+_East	SVK	2007	0.174546	3.27645	11.099	74.4593	0	0.482671	0.372186	0.0473269	0	0	0.00024932	0.0830105	54.9447	48.933	0.00851729
CH4	EU+_East	SVN	2007	0.089033	0.537753	6.10015	14.3239	0	0.357729	0.0859682	0	0	0	1.566e-05	0.0389174	29.4184	49	0.0432541
CH4	EU+_North	DNK	2007	9.53594	0.494742	9.46006	8.73733	0.131824	0.833733	0.361048	1.263e-05	0	0	0.00334596	0.358592	44.607	225.938	0.0142328
CH4	EU+_North	EST	2007	0.244205	0.133382	5.00878	1.32087	0	0.264885	0.0714427	2e-06	0	0	6.26e-05	0.0179699	17.9515	23.2104	0.301494
CH4	EU+_North	FIN	2007	1.07385	0.661218	6.95227	2.25548	0.0059	0.824324	0.236784	0.00483467	0	0	0.004384	0.495365	106.488	100.59	0.00836908
CH4	EU+_North	ISL	2007	0.00349616	0.125651	0.00176995	0.123686	0.00223079	0.0803787	0.0219353	0	0	0	0.0001546	0.0110023	11.9527	13.5424	0
CH4	EU+_North	LTU	2007	0.294209	0.348359	7.12915	9.28184	0	0.622341	0.200188	0.601896	0	0	2.7e-05	0.033342	54.5243	81.8664	0.082147
CH4	EU+_North	LVA	2007	0.176391	0.210871	7.87345	3.92249	0	0.20063	0.125212	0.0208617	0	0	4.2e-05	0.098097	23.3662	35.7716	0.427776
CH4	EU+_North	NOR	2007	0.46964	1.17572	8.05599	42.3531	0	0.989653	0.0521776	0.080496	0	0	0.0311102	0.996666	58.9932	99.7853	0.011319
CH4	EU+_North	SWE	2007	1.6377	1.30263	4.30071	3.85542	0	1.70694	0.0981324	0.020075	0	0	0.0117858	0.500909	83.9633	134.221	0.0121035
CH4	EU+_South	CYP	2007	0.145	0.061936	0.192665	0.00659	0	0.175853	0.0612154	0	0	0	6.5e-05	0	18.8079	12.8538	0.0184915
CH4	EU+_South	ESP	2007	1.65656	44.2897	35.6224	46.4943	0	4.22861	1.9556	0.238577	0	0	0.0673659	0.403685	485.835	1041.34	18.1639
CH4	EU+_South	GRC	2007	0.7139	0.652944	3.77238	61.5453	0	3.82411	0.538507	0.0601236	0	0	0.00396764	0.280134	176.959	192.143	5.67701
CH4	EU+_South	HRV	2007	0.166853	0.397038	13.5885	11.5809	0	0.708329	0.178013	0.0318336	0	0	0.00028606	0.0655693	64.853	68.4676	0.00874143
CH4	EU+_South	ITA	2007	3.95668	13.2458	92.7691	238.044	0	10.7996	2.54243	1.36245	0	0	0.0581533	0.598046	759.283	710.57	73.8999
CH4	EU+_South	MLT	2007	0.0792448	0.00168001	0.0387157	0	0	0.0650577	0.0162747	0	0	0	2.59442e-06	0.000340518	7.21116	1.70392	0.0116007
CH4	EU+_South	PRT	2007	0.474038	3.80731	10.3287	2.48532	0.0764456	1.30768	0.584961	0.0520213	0	0	0.0183295	0.0555796	238.346	172.456	6.02441
CH4	EU+_WestCentral	AUT	2007	0.647487	2.89033	9.94775	11.4776	0	0.644902	0.114576	0.00435824	0	0	0.00503923	0.137725	91.6067	184.123	0.00100863
CH4	EU+_WestCentral	BEL	2007	1.21211	5.83433	10.3465	24.7596	0	0.798587	0.455376	0.0269528	0	0	0.00225698	0.40569	84.4426	235.566	0.00593969
CH4	EU+_WestCentral	CHE	2007	0.0197807	0.376669	3.60066	9.47333	0	1.19128	0.0349718	0.00369936	0	0	0.00667377	0.256086	27.4694	164.386	0.16821
CH4	EU+_WestCentral	DEU	2007	49.2541	36.4764	30.7367	405.838	1.10641	8.30579	0.74871	0.0617839	0	0	0.0829703	2.37337	694.838	1290.39	18.2486
CH4	EU+_WestCentral	FRA	2007	0.737024	13.9159	77.2225	57.921	0.0260335	8.15803	3.58973	0.156201	0	0	0.0729859	1.01133	751.745	1583.64	4.27131
CH4	EU+_WestCentral	GBR	2007	5.51202	9.01302	26.5239	383.358	0	9.24747	2.29267	0.0136287	0	0	0.125066	1.66086	1664.95	1043.61	9.62271
CH4	EU+_WestCentral	IRL	2007	0.348419	0.427806	7.25445	3.80934	0	0.95345	0.309022	0.000671106	0	0	0.0022629	0.0497559	26.7018	475.482	0.246225
CH4	EU+_WestCentral	LUX	2007	0.067496	0.0934223	0.353196	2.07353	0	0.0377496	0.00376927	8.38592e-05	0	0	3.95e-06	0.014542	3.69444	16.76	0
CH4	EU+_WestCentral	NLD	2007	3.79969	15.1215	52.316	34.2705	1.76026	2.64525	0.402625	0.0429354	0	0	0.000294632	0.271572	214.426	453.879	0.00437071
CH4	NON_EU	ALB	2007	0.4556	0.0576	1.13751	7.5648	0	0.1638	0.272	0.004	0	0	0	0.0132	40.5962	68.747	0.573345
CH4	NON_EU	BIH	2007	1.574	1.7516	6.76556	26.5822	0	0.2608	0.3256	0.0744	0	0	0	0.0074	52.7142	45.0408	0.0190518
CH4	NON_EU	BLR	2007	55.6496	4.6078	37.6936	64.4798	0	2.8386	0.8338	0.1826	0	0	0	0.2524	169.986	279.485	0.906307
CH4	NON_EU	KOS	2007	0.6718	0.0084	1.76393	5.2024	0	0.0662	0.3096	0.064	0	0	0	0.0536	18.3408	17.9608	0.0654486
CH4	NON_EU	MDA	2007	8.334	1.572	11.4108	2.5338	0	0.2828	0.109	0.1912	0	0	0	0.0172	58.6066	31.9256	0.636555
CH4	NON_EU	MKD	2007	0.929	0.2232	2.24651	6.6266	0	0.1018	0.083	0.111	0	0	0	0.0046	22.9838	24.2806	0.075647
CH4	NON_EU	MNE	2007	0.2282	0.005	0.621225	1.096	0	0.0556	0.0584	0.0084	0	0	0	0.0174	9.3732	7.2614	0.419531
CH4	NON_EU	RUS	2007	954.258	160.853	987.992	9060.55	0	34.5804	4.8982	0.6826	0	0	0.0704	0.8918	3315.29	1242.72	50.7703
CH4	NON_EU	SRB	2007	6.92	3.3126	12.8497	53.5582	0	0.6926	0.3586	0.3002	0	0	0	0.2354	77.3508	87.5534	0.58859
CH4	NON_EU	TUR	2007	30.0328	16.0296	87.4771	91.641	0	2.6722	4.3714	1.7428	0	0	0.017	1.004	935.259	816.749	42.2906
CH4	NON_EU	UKR	2007	61.8186	38.3644	170.116	1629.62	0	9.9954	1.5328	0.5086	0	0	0.0042	0.3778	637.965	502.119	47.0223
CH4	EU+_East	BGR	2008	0.326865	1.61462	10.9472	44.0839	0	0.565232	0.303301	0.323056	0	0	0.00104396	0.0390682	188.867	73.2462	4.89452
CH4	EU+_East	CZE	2008	0.938452	4.42864	28.5796	233.353	0	1.57312	0.441985	0.0503394	0	0	5.91e-05	0.135576	165.939	147.646	0.016026
CH4	EU+_East	HUN	2008	1.08592	2.34435	15.0493	38.3653	0	1.14269	0.481513	0.0847224	0	0	2.765e-05	0.0950993	156.078	99.9243	0.822937
CH4	EU+_East	POL	2008	2.84826	6.20925	137.368	790.421	0	3.87676	1.77881	1.27139	0	0	0.000635237	0.342061	605.775	561.013	0.359183
CH4	EU+_East	ROU	2008	0.514848	3.62764	46.3735	561.962	0	1.50514	0.487821	0.0348395	0	0	0.00453397	0.105	196.795	573.148	5.12172
CH4	EU+_East	SVK	2008	0.172758	3.28385	9.96808	79.7229	0	0.468483	0.398494	0.0547333	0	0	0.000274839	0.0854419	55.4385	47.007	0.00851729
CH4	EU+_East	SVN	2008	0.14342	0.410295	6.33067	14.216	0	0.350357	0.0898888	0	0	0	1.465e-05	0.0400676	26.0831	47.5513	0.0432541
CH4	EU+_North	DNK	2008	10.0527	0.53271	8.69032	7.88006	0.11782	0.7257	0.279007	1.2241e-05	0	0	0.00333451	0.335625	43.0955	223.499	0.0142328
CH4	EU+_North	EST	2008	0.294694	0.119947	5.10921	1.26583	0	0.228091	0.0675362	5e-06	0	0	6.98e-05	0.0131855	17.3033	23.0684	0.301494
CH4	EU+_North	FIN	2008	1.04877	0.623966	7.45292	2.1786	0.00547	0.705217	0.241785	0.00543014	0	0	0.004376	0.488329	101.829	99.2806	0.00836908
CH4	EU+_North	ISL	2008	0.00253669	0.10607	0.00171423	0.124802	0.00169868	0.0800259	0.0203635	0	0	0	0.0001838	0.0105321	11.4932	13.6684	0
CH4	EU+_North	LTU	2008	0.330385	0.35277	7.38969	9.11343	0	0.590424	0.188008	0.53413	0	0	3.05e-05	0.0337042	54.0005	79.7143	0.082147
CH4	EU+_North	LVA	2008	0.171149	0.226289	6.99504	4.02782	0	0.158263	0.10818	0.0155732	0	0	6.83e-05	0.0896236	23.6492	34.7496	0.427776
CH4	EU+_North	NOR	2008	0.431765	1.32366	8.01791	38.4089	0	0.901427	0.0485302	0.0996429	0	0	0.0345962	0.951491	56.5579	99.8232	0.011319
CH4	EU+_North	SWE	2008	1.75058	1.30275	4.20661	3.43736	0	1.5562	0.0920776	0.0229118	0	0	0.0134795	0.505152	73.2038	134.622	0.0121035
CH4	EU+_South	CYP	2008	0.152	0.060276	0.19691	0.00671	0	0.173506	0.0614455	0	0	0	6.2e-05	0	19.074	12.4888	0.0184915
CH4	EU+_South	ESP	2008	1.54411	43.0116	38.1186	45.465	0	3.71385	1.55792	0.234429	0	0	0.0607106	0.334368	492.665	976.774	17.1645
CH4	EU+_South	GRC	2008	0.718011	0.684283	3.75318	61.1119	0	3.55799	0.545658	0.0536035	0	0	0.00358498	0.272791	177.799	189.621	5.67785
CH4	EU+_South	HRV	2008	0.15112	0.36534	13.6358	11.1057	0	0.647412	0.154932	0.0396899	0	0	0.00028606	0.0706942	68.571	65.5027	0.00874143
CH4	EU+_South	ITA	2008	3.83903	12.7421	109.155	240.328	0	9.90915	2.37429	1.31122	0	0	0.0535063	0.543822	737.998	705.542	67.8253
CH4	EU+_South	MLT	2008	0.0787199	0.00182004	0.0414423	0	0	0.0767554	0.0171628	0	0	0	2.07152e-06	0.00037198	4.05671	1.62544	0.0116007
CH4	EU+_South	PRT	2008	0.492854	3.50612	9.9019	2.60919	0.0782962	1.17934	0.534001	0.0572807	0	0	0.016017	0.0530436	230.748	171.93	6.14737
CH4	EU+_WestCentral	AUT	2008	0.720085	2.83898	10.1778	10.8043	0	0.565444	0.109341	0.00442856	0	0	0.00559437	0.13421	87.1733	184.085	0.00100863
CH4	EU+_WestCentral	BEL	2008	1.08347	5.4438	12.6011	23.8098	0	0.704575	0.371024	0.0237453	0	0	0.00225021	0.406314	77.7977	233.746	0.00593969
CH4	EU+_WestCentral	CHE	2008	0.0215596	0.388662	3.71387	9.19765	0	1.09682	0.0320877	0.00492955	0	0	0.00639557	0.234343	26.6503	168.508	0.16821
CH4	EU+_WestCentral	DEU	2008	55.2456	34.592	34.0633	390.801	1.03771	7.18685	0.660803	0.0813113	0	0	0.0848983	2.1074	645.843	1303.62	20.898
CH4	EU+_WestCentral	FRA	2008	0.750403	11.7413	75.8299	57.9567	0.0210002	6.72738	3.16729	0.160047	0	0	0.0726254	0.926193	741.969	1600.46	3.99569
CH4	EU+_WestCentral	GBR	2008	5.8856	7.70737	29.5473	365.797	0	8.53395	1.79507	0.0117148	0	0	0.118168	1.56208	1489.54	1012.64	9.38764
CH4	EU+_WestCentral	IRL	2008	0.278586	0.400489	7.75074	3.72773	0	0.901911	0.247135	0.000512504	0	0	0.00208164	0.0537366	20.9741	473.006	0.246225
CH4	EU+_WestCentral	LUX	2008	0.0652408	0.0936787	0.375541	1.9828	0	0.0353531	0.00346128	9.49768e-05	0	0	3.79e-06	0.0129525	3.71056	17.2406	0
CH4	EU+_WestCentral	NLD	2008	3.91364	14.7831	66.7851	35.8982	1.71593	2.66401	0.387971	0.0465872	0	0	0.000282862	0.260254	200.784	460.859	0.00437071
CH4	NON_EU	ALB	2008	0.6804	0.0444	1.13511	8.6062	0	0.1572	0.271	0.006	0	0	0	0.0148	41.2228	68.873	0.573345
CH4	NON_EU	BIH	2008	2.219	1.9624	6.80576	24.9378	0	0.2732	0.3534	0.1116	0	0	0	0.0106	52.7508	45.3922	0.0190518
CH4	NON_EU	BLR	2008	47.0404	4.5292	38.712	66.7792	0	2.9214	0.9382	0.1684	0	0	0	0.2376	168.751	282.333	0.906307
CH4	NON_EU	KOS	2008	0.9812	0.0086	1.76893	5.0206	0	0.0678	0.3084	0.096	0	0	0	0.0514	18.4432	18.0092	0.0654486
CH4	NON_EU	MDA	2008	7.899	1.571	11.4326	2.2212	0	0.2842	0.121	0.1308	0	0	0	0.0198	57.7424	31.5524	0.636555
CH4	NON_EU	MKD	2008	1.285	0.1998	2.33411	6.8384	0	0.1072	0.087	0.163	0	0	0	0.0064	23.1892	23.5214	0.075647
CH4	NON_EU	MNE	2008	0.3368	0.004	0.621225	1.083	0	0.0594	0.0626	0.0126	0	0	0	0.0166	9.4728	7.0966	0.419531
CH4	NON_EU	RUS	2008	975.062	160.669	974.328	8901.92	0	33.0256	5.2158	0.7524	0	0	0.0696	0.8512	3373.63	1142.29	50.7703
CH4	NON_EU	SRB	2008	8.329	3.5794	12.6263	49.0748	0	0.6154	0.3644	0.3948	0	0	0	0.2286	77.6282	86.0526	0.58859
CH4	NON_EU	TUR	2008	32.2022	19.5664	85.2341	89.553	0	2.1458	4.5346	2.5812	0	0	0.015	0.894	929.645	863.666	42.2906
CH4	NON_EU	UKR	2008	59.1944	39.7446	167.871	1504.77	0	9.2536	1.5982	0.4974	0	0	0.0028	0.4082	628.678	499.214	47.0223
CH4	EU+_East	BGR	2009	0.314763	0.855019	10.2726	41.8526	0	0.556489	0.275952	0.359278	0	0	0.00101264	0.0365556	183.008	69.1853	5.08303
CH4	EU+_East	CZE	2009	0.971403	4.26585	30.6141	218.586	0	1.5026	0.425355	0.0507598	0	0	6.62e-05	0.132811	171.38	141.304	0.016026
CH4	EU+_East	HUN	2009	1.13696	2.15378	20.5845	36.0261	0	1.06403	0.423884	0.075318	0	0	2.493e-05	0.0903119	155.631	97.2628	0.870999
CH4	EU+_East	POL	2009	3.29526	5.79772	140.372	752.999	0	3.66938	1.86753	1.21077	0	0	0.00062377	0.330407	599.89	550.454	0.359183
CH4	EU+_East	ROU	2009	0.456261	1.7507	45.5121	512.84	0	1.47718	0.48941	0.051585	0	0	0.00401083	0.0303452	197.093	552.083	7.40776
CH4	EU+_East	SVK	2009	0.205988	3.17429	9.35701	70.7458	0	0.410508	0.341082	0.0541411	0	0	0.00021268	0.0759216	57.1493	45.1054	0.00851729
CH4	EU+_East	SVN	2009	0.110874	0.418168	6.55444	13.8375	0	0.306689	0.0654716	0.00180536	0	0	1.396e-05	0.0343403	23.6369	47.0198	0.0432541
CH4	EU+_North	DNK	2009	8.77719	0.493433	8.1428	6.46699	0.11794	0.642323	0.211376	1.1984e-05	0	0	0.00302309	0.287251	42.072	222.262	0.0142328
CH4	EU+_North	EST	2009	0.354856	0.0757981	5.35345	0.859713	0	0.197357	0.0499283	4e-06	0	0	6.11e-05	0.0173464	18.1419	22.9134	0.301494
CH4	EU+_North	FIN	2009	0.988884	0.539437	7.84855	2.07543	0.00579	0.62881	0.217704	0.0057848	0	0	0.003943	0.47271	98.2287	100.715	0.00836908
CH4	EU+_North	ISL	2009	0.00200811	0.104362	0.00326764	0.113985	0.00155061	0.0800553	0.0206958	0	0	0	0.0001527	0.00725703	11.0841	13.8339	0
CH4	EU+_North	LTU	2009	0.380468	0.179169	7.46845	8.52057	0	0.47288	0.166192	0.481374	0	0	1.8e-05	0.0256525	52.3112	78.2083	0.082147
CH4	EU+_North	LVA	2009	0.166993	0.29304	7.60121	3.80501	0	0.129474	0.0898731	0.0117008	0	0	4.85e-06	0.0889942	23.7248	34.6621	0.427776
CH4	EU+_North	NOR	2009	0.95741	1.20626	8.18948	37.2127	0	0.829827	0.0427442	0.105249	0	0	0.033137	0.906679	57.057	101.315	0.011319
CH4	EU+_North	SWE	2009	1.95426	1.27168	4.17898	3.23325	0	1.39944	0.0867046	0.0267693	0	0	0.0113856	0.496101	69.3762	132.447	0.0121035
CH4	EU+_South	CYP	2009	0.154	0.048808	0.214755	0.00669	0	0.16604	0.0559618	0	0	0	5e-05	0.00044	19.2303	12.3409	0.0184915
CH4	EU+_South	ESP	2009	1.29414	37.4079	45.2529	43.8293	0	3.43149	1.2812	0.263801	0	0	0.0537357	0.290068	544.533	980.302	20.5907
CH4	EU+_South	GRC	2009	0.62358	0.60209	3.77334	60.1616	0	3.27642	0.528487	0.0642074	0	0	0.00402633	0.242031	166.295	188.129	6.27701
CH4	EU+_South	HRV	2009	0.140437	0.353064	14.1996	10.7836	0	0.604179	0.151384	0.0422818	0	0	0.00026408	0.0626041	70.5964	67.0225	0.00874143
CH4	EU+_South	ITA	2009	3.62624	8.49303	105.407	235.257	0	8.91098	2.20503	1.1532	0	0	0.0518229	0.533296	741.218	708.066	75.2081
CH4	EU+_South	MLT	2009	0.0739831	0.000812774	0.0407965	0	0	0.0605402	0.0154076	0	0	0	3.59243e-06	0.000349249	4.75611	1.54772	0.0116007
CH4	EU+_South	PRT	2009	0.53954	3.22721	9.48803	2.57787	0.0832784	1.10842	0.503808	0.0586668	0	0	0.0188605	0.047155	226.21	170.895	5.59603
CH4	EU+_WestCentral	AUT	2009	0.7824	2.77373	10.1445	11.0101	0	0.521509	0.0986477	0.00465739	0	0	0.00515004	0.119917	81.336	186.963	0.00100863
CH4	EU+_WestCentral	BEL	2009	1.07689	3.12448	13.9683	23.9351	0	0.633043	0.322988	0.0208057	0	0	0.00222665	0.385562	74.6393	235.034	0.00593969
CH4	EU+_WestCentral	CHE	2009	0.0217605	0.332816	3.53825	8.97121	0	0.979797	0.0275866	0.00486229	0	0	0.00600531	0.211745	25.7876	166.273	0.16821
CH4	EU+_WestCentral	DEU	2009	60.5187	32.4803	34.7959	340.307	1.31454	6.603	0.641951	0.104834	0	0	0.0830206	1.73733	596.738	1302.37	26.3304
CH4	EU+_WestCentral	FRA	2009	0.877173	9.35362	72.207	57.6152	0.0174514	6.01403	2.59235	0.138641	0	0	0.0686664	1.02555	717.709	1586.47	4.72434
CH4	EU+_WestCentral	GBR	2009	5.63842	7.94348	29.6665	362.523	0	6.07443	1.45287	0.00867527	0	0	0.0893271	1.38161	1325.84	1001.27	8.98526
CH4	EU+_WestCentral	IRL	2009	0.270629	0.346807	8.17411	2.99552	0	0.804045	0.199498	0.000330341	0	0	0.001701	0.0462768	13.9448	465.588	0.246225
CH4	EU+_WestCentral	LUX	2009	0.0665361	0.0794812	0.396702	2.00454	0	0.0323478	0.00315215	7.82912e-05	0	0	3.87e-06	0.0116331	3.67841	17.3244	0
CH4	EU+_WestCentral	NLD	2009	4.19377	14.2795	68.595	30.432	1.69352	2.56185	0.341026	0.0587319	0	0	0.000273483	0.244444	190.285	466.292	0.00437071
CH4	NON_EU	ALB	2009	0.9052	0.0312	1.13271	9.6476	0	0.1506	0.27	0.008	0	0	0	0.0164	41.8494	68.999	0.573345
CH4	NON_EU	BIH	2009	2.864	2.1732	6.84596	23.2934	0	0.2856	0.3812	0.1488	0	0	0	0.0138	52.7874	45.7436	0.0190518
CH4	NON_EU	BLR	2009	38.4312	4.4506	39.7304	69.0786	0	3.0042	1.0426	0.1542	0	0	0	0.2228	167.517	285.181	0.906307
CH4	NON_EU	KOS	2009	1.2906	0.0088	1.77393	4.8388	0	0.0694	0.3072	0.128	0	0	0	0.0492	18.5456	18.0576	0.0654486
CH4	NON_EU	MDA	2009	7.464	1.57	11.4544	1.9086	0	0.2856	0.133	0.0704	0	0	0	0.0224	56.8782	31.1792	0.636555
CH4	NON_EU	MKD	2009	1.641	0.1764	2.42171	7.0502	0	0.1126	0.091	0.215	0	0	0	0.0082	23.3946	22.7622	0.075647
CH4	NON_EU	MNE	2009	0.4454	0.003	0.621225	1.07	0	0.0632	0.0668	0.0168	0	0	0	0.0158	9.5724	6.9318	0.419531
CH4	NON_EU	RUS	2009	995.867	160.486	960.664	8743.28	0	31.4708	5.5334	0.8222	0	0	0.0688	0.8106	3431.98	1041.86	50.7703
CH4	NON_EU	SRB	2009	9.738	3.8462	12.4029	44.5914	0	0.5382	0.3702	0.4894	0	0	0	0.2218	77.9056	84.5518	0.58859
CH4	NON_EU	TUR	2009	34.3716	23.1032	82.9911	87.465	0	1.6194	4.6978	3.4196	0	0	0.013	0.784	924.03	910.584	42.2906
CH4	NON_EU	UKR	2009	56.5702	41.1248	165.626	1379.93	0	8.5118	1.6636	0.4862	0	0	0.0014	0.4386	619.39	496.31	47.0223
CH4	EU+_East	BGR	2010	0.336465	0.802688	11.6045	44.5488	0	0.49929	0.260413	0.373064	0	0	0.000793789	0.0332527	177.768	68.0877	6.40358
CH4	EU+_East	CZE	2010	1.09651	3.96887	33.4013	220.792	0	1.3023	0.374489	0.0555963	0	0	6.18e-05	0.126132	179.589	136.533	0.016026
CH4	EU+_East	HUN	2010	1.16353	2.27458	23.2085	37.9469	0	0.882682	0.377098	0.0793244	0	0	2.659e-05	0.0902248	152.094	96.398	0.678754
CH4	EU+_East	POL	2010	3.66472	6.20251	158.68	738.329	0	3.36962	1.74531	1.09562	0	0	0.000707206	0.327786	591.177	549.654	0.359183
CH4	EU+_East	ROU	2010	0.433664	2.00416	46.9997	487.831	0	1.22584	0.443717	0.013802	0	0	0.00502855	0.0318779	199.948	482.29	5.786
CH4	EU+_East	SVK	2010	0.277367	0.871112	10.8565	74.9282	0	0.378028	0.30536	0.0625783	0	0	9.517e-05	0.0763671	57.8129	44.5505	0.00851729
CH4	EU+_East	SVN	2010	0.107923	0.380098	6.63137	13.9066	0	0.279609	0.0604142	0.00225776	0	0	1.388e-05	0.0332162	23.283	46.1774	0.0432541
CH4	EU+_North	DNK	2010	10.9454	0.551974	8.2269	6.30791	0.0985366	0.573807	0.203169	1.0767e-05	0	0	0.00269819	0.266088	39.5471	225.429	0.0142328
CH4	EU+_North	EST	2010	0.488679	0.0808981	5.50947	0.92275	0	0.172303	0.0497468	5e-06	0	0	6.17e-05	0.0218186	17.923	23.4771	0.301494
CH4	EU+_North	FIN	2010	1.14892	0.69783	8.74064	1.7871	0.00476	0.57346	0.205892	0.00556707	0	0	0.003842	0.480251	98.2078	102.69	0.00836908
CH4	EU+_North	ISL	2010	0.0019759	0.10671	0.00195275	0.202633	0.00151366	0.0772484	0.0198968	0	0	0	0.0001482	0.00575055	11.083	13.7223	0
CH4	EU+_North	LTU	2010	0.391979	0.19174	7.57321	9.57905	0	0.40896	0.191774	0.459974	0	0	1.15e-05	0.0260544	51.1794	77.1282	0.082147
CH4	EU+_North	LVA	2010	0.19505	0.361227	6.23582	3.6642	0	0.120861	0.103676	0.0136662	0	0	3.62e-06	0.0893879	23.9427	34.4174	0.427776
CH4	EU+_North	NOR	2010	1.25587	1.31242	9.18418	37.7096	0	0.762569	0.0436807	0.135526	0	0	0.0349145	0.881605	56.18	100.687	0.011319
CH4	EU+_North	SWE	2010	2.19352	1.34777	4.08318	3.02471	0	1.23841	0.0922183	0.0362131	0	0	0.0106747	0.49362	64.4961	132.554	0.0121035
CH4	EU+_South	CYP	2010	0.149	0.048198	0.16456	0.0066	0	0.1621	0.0527791	0	0	0	5.4e-05	0.00044	19.2479	12.6524	0.0184915
CH4	EU+_South	ESP	2010	1.13519	40.436	45.9958	41.4656	0	3.20929	1.11794	0.323546	0	0	0.05279	0.265599	505.9	944.685	21.0887
CH4	EU+_South	GRC	2010	0.56447	0.583466	4.75809	53.1763	0	3.4447	0.628102	0.0765692	0	0	0.00329585	0.214617	177.591	191.408	6.68739
CH4	EU+_South	HRV	2010	0.125542	0.341664	15.2803	10.8156	0	0.534297	0.144664	0.0369045	0	0	0.00022012	0.058774	73.0823	67.2199	0.00874143
CH4	EU+_South	ITA	2010	3.56427	11.2592	102.916	245.765	0	8.10107	2.06994	1.272	0	0	0.0526924	0.515379	734.311	692.262	74.7071
CH4	EU+_South	MLT	2010	0.0732845	0.000699282	0.0315994	0	0	0.0574554	0.0159643	0	0	0	5.02e-06	0.000313628	5.52354	1.50289	0.0116007
CH4	EU+_South	PRT	2010	0.516158	3.52318	9.07787	2.73122	0.0628379	1.01361	0.479616	0.0547564	0	0	0.0194553	0.0460228	220.656	168.864	5.76523
CH4	EU+_WestCentral	AUT	2010	0.912373	2.79343	11.1669	11.3691	0	0.49011	0.0961339	0.00474671	0	0	0.00490322	0.11303	76.2395	186.954	0.00100863
CH4	EU+_WestCentral	BEL	2010	1.0884	3.47955	16.3498	26.0305	0	0.547151	0.320936	0.0184692	0	0	0.00225618	0.381719	66.9653	236.126	0.00593969
CH4	EU+_WestCentral	CHE	2010	0.021614	0.36482	3.66276	9.3342	0	0.906765	0.0258257	0.00580307	0	0	0.00665833	0.190123	25.1483	165.284	0.16821
CH4	EU+_WestCentral	DEU	2010	72.182	34.0024	50.0002	335.029	1.39999	5.95356	0.646818	0.101681	0	0	0.0833338	1.69898	551.882	1288.66	32.5234
CH4	EU+_WestCentral	FRA	2010	1.04171	11.5776	74.9078	60.3564	0.0148616	5.41785	2.31058	0.133241	0	0	0.0668427	1.04737	717.975	1568.66	4.66964
CH4	EU+_WestCentral	GBR	2010	5.78441	8.51129	34.9884	351.066	0	5.33254	1.29714	0.00741904	0	0	0.0946548	1.42366	1139.79	1006.95	8.57169
CH4	EU+_WestCentral	IRL	2010	0.268519	0.358658	7.80753	3.17071	0	0.702847	0.170292	0.000287125	0	0	0.00128107	0.0444615	13.6517	456.557	0.246225
CH4	EU+_WestCentral	LUX	2010	0.0636799	0.0905274	0.412426	2.15569	0	0.0297801	0.00287042	7.55653e-05	0	0	3.82e-06	0.0105218	3.23347	17.6043	0
CH4	EU+_WestCentral	NLD	2010	4.47922	15.148	73.3721	33.4903	1.69312	2.47474	0.314618	0.0684346	0	0	0.000293841	0.230577	177.347	467.213	0.00437071
CH4	NON_EU	ALB	2010	1.13	0.018	1.13031	10.689	0	0.144	0.269	0.01	0	0	0	0.018	42.476	69.125	0.573345
CH4	NON_EU	BIH	2010	3.509	2.384	6.88616	21.649	0	0.298	0.409	0.186	0	0	0	0.017	52.824	46.095	0.0190518
CH4	NON_EU	BLR	2010	29.822	4.372	40.7488	71.378	0	3.087	1.147	0.14	0	0	0	0.208	166.283	288.029	0.906307
CH4	NON_EU	KOS	2010	1.6	0.009	1.77893	4.657	0	0.071	0.306	0.16	0	0	0	0.047	18.648	18.106	0.0654486
CH4	NON_EU	MDA	2010	7.029	1.569	11.4762	1.596	0	0.287	0.145	0.01	0	0	0	0.025	56.014	30.806	0.636555
CH4	NON_EU	MKD	2010	1.997	0.153	2.50931	7.262	0	0.118	0.095	0.267	0	0	0	0.01	23.6	22.003	0.075647
CH4	NON_EU	MNE	2010	0.554	0.002	0.621225	1.057	0	0.067	0.071	0.021	0	0	0	0.015	9.672	6.767	0.419531
CH4	NON_EU	RUS	2010	1016.67	160.302	947	8584.65	0	29.916	5.851	0.892	0	0	0.068	0.77	3490.32	941.423	50.7703
CH4	NON_EU	SRB	2010	11.147	4.113	12.1795	40.108	0	0.461	0.376	0.584	0	0	0	0.215	78.183	83.051	0.58859
CH4	NON_EU	TUR	2010	36.541	26.64	80.7481	85.377	0	1.093	4.861	4.258	0	0	0.011	0.674	918.416	957.501	42.2906
CH4	NON_EU	UKR	2010	53.946	42.505	163.381	1255.09	0	7.77	1.729	0.475	0	0	0	0.469	610.102	493.405	47.0223
CH4	EU+_East	BGR	2011	0.379225	0.77208	12.6656	54.8502	0	0.440117	0.259891	0.353558	0	0	0.00120084	0.037465	176.42	67.6493	6.33664
CH4	EU+_East	CZE	2011	1.14351	3.82795	33.6778	219.569	0	1.20753	0.340953	0.0579218	0	0	3.27e-05	0.136286	182.852	135.761	0.016026
CH4	EU+_East	HUN	2011	0.931367	2.24644	26.6075	33.157	0	0.753802	0.318462	0.084904	0	0	2.776e-05	0.0885424	148.836	96.3282	0.870459
CH4	EU+_East	POL	2011	4.07383	6.73686	144.621	730.634	0	3.11964	1.69524	1.02816	0	0	0.000773062	0.330941	567.557	547.834	0.359183
CH4	EU+_East	ROU	2011	0.514945	1.79802	41.5995	482.497	0	1.10431	0.465896	0.0574777	0	0	0.00340003	0.0408456	178.573	480.809	5.85842
CH4	EU+_East	SVK	2011	0.310458	1.01695	10.1844	77.6716	0	0.280897	0.189105	0.0467325	0	0	7.622e-05	0.0773057	59.1566	43.797	0.00851729
CH4	EU+_East	SVN	2011	0.116169	0.166343	6.65306	13.7911	0	0.269858	0.0564208	0.00264649	0	0	1.948e-05	0.0311984	23.3963	45.9657	0.0432541
CH4	EU+_North	DNK	2011	9.16123	0.51128	7.14596	5.26818	0.0925262	0.490424	0.177851	2.033e-05	0	0	0.0021425	0.248965	39.5386	223.158	0.0142328
CH4	EU+_North	EST	2011	0.541408	0.105428	4.80746	0.831936	0	0.152628	0.0470822	6e-06	0	0	7.3e-05	0.0192328	16.5939	23.5991	0.301494
CH4	EU+_North	FIN	2011	1.0412	0.791275	7.13993	1.55889	0.00475	0.526887	0.19527	0.00509204	0	0	0.00423	0.505199	94.8537	101.097	0.00836908
CH4	EU+_North	ISL	2011	0.00157908	0.110139	0.00249126	0.160429	0.00150714	0.074632	0.0222647	0	0	0	0.000142	0.00493503	10.1268	13.7898	0
CH4	EU+_North	LTU	2011	0.352127	0.203709	7.4717	7.4843	0	0.344963	0.200084	0.432296	0	0	1.3e-05	0.0266497	47.4058	76.2558	0.082147
CH4	EU+_North	LVA	2011	0.176644	0.425581	6.09088	2.52116	0	0.113243	0.0781139	0.0153774	0	0	4.82e-06	0.107193	22.9742	34.8117	0.427776
CH4	EU+_North	NOR	2011	1.1157	1.39221	8.06277	35.7166	0	0.70441	0.0554733	0.152159	0	0	0.0432491	0.841262	55.4655	98.1255	0.011319
CH4	EU+_North	SWE	2011	1.82242	1.27708	4.26201	2.91436	0	1.03769	0.110845	0.0405745	0	0	0.0133933	0.494055	60.3532	131.463	0.0121035
CH4	EU+_South	CYP	2011	0.144	0.034129	0.19114	0.00657	0	0.153722	0.04883	0	0	0	1.63e-05	0.00088	19.3339	12.748	0.0184915
CH4	EU+_South	ESP	2011	1.30413	39.6395	45.7688	40.2408	0	2.90143	0.973225	0.340396	0	0	0.0510812	0.275387	527.818	937.934	21.0649
CH4	EU+_South	GRC	2011	0.588615	0.554373	5.17136	55.7935	0	2.9968	0.534075	0.11519	0	0	0.0036468	0.14057	168.66	190.351	6.86023
CH4	EU+_South	HRV	2011	0.152096	0.281283	14.8827	9.96426	0	0.49432	0.130877	0.0255812	0	0	0.0002421	0.0578382	74.2847	66.8671	0.00874143
CH4	EU+_South	ITA	2011	4.0194	15.3574	68.8263	241.032	0	7.64122	2.00873	1.28694	0	0	0.0463135	0.470277	709.843	695.08	74.0374
CH4	EU+_South	MLT	2011	0.0752982	0.000974525	0.0377058	0	0	0.0539277	0.0162831	0	0	0	3.85353e-06	0.000412265	5.1045	1.44941	0.0116007
CH4	EU+_South	PRT	2011	0.550201	3.543	9.6794	2.67583	0.0584153	0.875398	0.414238	0.0571646	0	0	0.0161057	0.0449891	218.378	166.983	6.21772
CH4	EU+_WestCentral	AUT	2011	0.916011	2.82005	10.1447	11.2584	0	0.453901	0.084752	0.00439397	0	0	0.00427891	0.111887	71.5536	184.978	0.00100863
CH4	EU+_WestCentral	BEL	2011	1.08329	2.87683	13.2212	24.218	0	0.501294	0.27522	0.0183087	0	0	0.00234736	0.385249	64.6151	233.465	0.00593969
CH4	EU+_WestCentral	CHE	2011	0.0201038	0.343917	2.86009	9.07142	0	0.824362	0.023884	0.00591159	0	0	0.00632681	0.172866	24.4597	165.097	0.16821
CH4	EU+_WestCentral	DEU	2011	79.3942	34.4299	45.9114	328.024	1.44642	5.77437	0.609072	0.104462	0	0	0.0842945	1.62313	520.079	1271.95	39.8356
CH4	EU+_WestCentral	FRA	2011	0.987434	9.83956	60.2309	57.8307	0.0129742	4.78733	2.0164	0.146854	0	0	0.068917	0.855172	697.625	1556.44	4.59898
CH4	EU+_WestCentral	GBR	2011	5.89535	8.07949	30.5995	339.177	0	4.90031	1.06134	0.00595397	0	0	0.0918911	1.37315	1055.51	1002.25	8.48178
CH4	EU+_WestCentral	IRL	2011	0.225116	0.319494	7.19235	3.0089	0	0.649071	0.153682	0.00030298	0	0	0.000609631	0.0428842	17.822	451.889	0.246225
CH4	EU+_WestCentral	LUX	2011	0.0637187	0.0846145	0.333863	1.86869	0	0.0281816	0.00305745	3.18899e-05	0	0	4.06e-06	0.00960568	3.15421	17.0823	0
CH4	EU+_WestCentral	NLD	2011	4.12523	14.9676	67.1226	34.0951	1.68181	2.41037	0.306054	0.0962489	0	0	0.000313227	0.217347	166.514	462.39	0.00437071
CH4	NON_EU	ALB	2011	1.1018	0.0168	1.12991	11.3348	0	0.1382	0.2894	0.0184	0	0	0	0.0166	41.1656	67.6592	0.573345
CH4	NON_EU	BIH	2011	3.4042	2.1778	6.99516	21.9084	0	0.2766	0.4364	0.1616	0	0	0	0.015	51.7448	44.8762	0.0190518
CH4	NON_EU	BLR	2011	31.9654	4.3098	40.2408	67.0108	0	2.691	1.0334	0.1366	0	0	0	0.2296	168.046	291.486	0.906307
CH4	NON_EU	KOS	2011	1.5668	0.0086	1.77433	4.5834	0	0.0668	0.331	0.1404	0	0	0	0.0452	18.809	18.0666	0.0654486
CH4	NON_EU	MDA	2011	7.1832	1.4576	11.3502	1.3876	0	0.2722	0.137	0.01	0	0	0	0.0222	58.9504	30.6714	0.636555
CH4	NON_EU	MKD	2011	1.9618	0.1544	2.63511	7.23	0	0.1052	0.0938	0.23	0	0	0	0.0092	23.8458	22.9348	0.075647
CH4	NON_EU	MNE	2011	0.5388	0.0018	0.619825	1.0024	0	0.0632	0.0756	0.0286	0	0	0	0.0144	9.837	6.9406	0.419531
CH4	NON_EU	RUS	2011	1026.94	160.967	905.468	8590.61	0	27.6752	5.7128	1.1038	0	0	0.071	1.279	3457.05	942.351	50.7703
CH4	NON_EU	SRB	2011	11.4108	3.7886	12.3109	40.032	0	0.438	0.4026	0.56	0	0	0	0.2058	79.4782	82.1332	0.58859
CH4	NON_EU	TUR	2011	37.4104	26.6116	86.1941	86.461	0	0.9962	5.255	4.4532	0	0	0.011	0.6698	927.428	945.997	42.2906
CH4	NON_EU	UKR	2011	50.4836	38.3802	159.046	1212.29	0	7.2386	1.791	0.3824	0	0	0	0.4532	619.997	492.184	47.0223
CH4	EU+_East	BGR	2012	0.331767	0.493015	13.1991	48.8906	0	0.40685	0.275158	0.372663	0	0	0.000830726	0.0371729	170.118	65.7294	5.64537
CH4	EU+_East	CZE	2012	1.16974	3.99593	34.8527	210.78	0	1.06182	0.286915	0.0650617	0	0	5.237e-05	0.123223	189.603	135.972	0.016026
CH4	EU+_East	HUN	2012	0.821251	1.89862	28.2633	30.3833	0	0.757272	0.283593	0.0654996	0	0	2.656e-05	0.0817615	147.723	99.2729	0.93769
CH4	EU+_East	POL	2012	4.82906	6.33739	149.222	733.356	0	2.96271	1.48702	1.00217	0	0	0.00110815	0.333256	550.733	546.47	0.359183
CH4	EU+_East	ROU	2012	0.457111	1.89227	43.3456	461.845	0	1.08832	0.427735	0.0373561	0	0	0.00178934	0.0336467	202.407	482.847	5.49234
CH4	EU+_East	SVK	2012	0.395349	0.946285	10.8651	58.9818	0	0.270419	0.192319	0.0541839	0	0	7.165e-05	0.0695043	60.4335	45.1962	0.00851729
CH4	EU+_East	SVN	2012	0.113035	0.150926	6.44854	13.108	0	0.240872	0.0540161	0.00507136	0	0	1.617e-05	0.0321269	22.6622	45.5495	0.0432541
CH4	EU+_North	DNK	2012	6.32652	0.35891	6.5198	4.62962	0.132053	0.436199	0.142456	2.487e-05	0	0	0.00225586	0.22571	38.2003	223.541	0.0142328
CH4	EU+_North	EST	2012	0.53268	0.116694	5.05303	0.865629	0	0.136484	0.0438445	5e-06	0	0	7.75e-05	0.0183274	15.9567	24.42	0.301494
CH4	EU+_North	FIN	2012	1.00223	0.777433	7.7448	1.61304	0.00501	0.46933	0.180014	0.00455607	0	0	0.003467	0.526063	92.8566	100.518	0.00836908
CH4	EU+_North	ISL	2012	0.00144373	0.121456	0.00120031	0.131054	0.00160135	0.0725516	0.0252829	0	0	0	0.0001461	0.00518826	8.9828	13.4998	0
CH4	EU+_North	LTU	2012	0.454538	0.218863	7.48569	9.70753	0	0.330818	0.189285	0.407932	0	0	1.2e-05	0.0260618	46.1429	75.5233	0.082147
CH4	EU+_North	LVA	2012	0.208063	0.486333	6.61667	3.18431	0	0.098106	0.0594954	0.0234192	0	0	1.13e-05	0.103511	22.6893	35.5908	0.427776
CH4	EU+_North	NOR	2012	0.991943	1.26914	8.36642	33.6983	0	0.655608	0.062432	0.339337	0	0	0.0354675	0.813493	53.8578	98.5195	0.011319
CH4	EU+_North	SWE	2012	1.87155	1.30614	4.18931	3.2205	0	0.737118	0.0989506	0.0445228	0	0	0.0126952	0.490632	55.1891	130.122	0.0121035
CH4	EU+_South	CYP	2012	0.137	0.022451	0.19791	0.00616	0	0.144654	0.0440787	0	0	0	1.04e-05	0.00044	19.6983	11.9672	0.0184915
CH4	EU+_South	ESP	2012	1.46593	42.5974	47.5484	38.2335	0	2.7996	0.809081	0.353321	0	0	0.0420129	0.249379	519.885	904.191	19.2634
CH4	EU+_South	GRC	2012	0.581368	0.468468	5.62056	59.2481	0	2.37351	0.280428	0.0758574	0	0	0.00335186	0.503769	159.658	187.874	6.83597
CH4	EU+_South	HRV	2012	0.150398	0.214978	14.8256	8.62097	0	0.39977	0.116566	0.0318785	0	0	0.00022012	0.0536021	74.1548	65.6235	0.00874143
CH4	EU+_South	ITA	2012	4.092	14.7289	96.2176	239.81	0	6.8044	1.76296	1.33106	0	0	0.0430428	0.435666	713.246	691.791	73.3852
CH4	EU+_South	MLT	2012	0.0799156	0.00114073	0.0495387	0	0	0.0496856	0.016151	1.09e-05	0	0	3.936e-06	0.000376413	5.09747	1.47986	0.0116007
CH4	EU+_South	PRT	2012	0.527026	3.17991	9.66373	2.70489	0.0500492	0.777579	0.353842	0.0527209	0	0	0.0155837	0.0449269	210.464	166.466	6.20247
CH4	EU+_WestCentral	AUT	2012	0.931928	2.82354	10.2504	11.6343	0	0.427023	0.0768965	0.00442077	0	0	0.00427148	0.104172	67.4546	184.154	0.00100863
CH4	EU+_WestCentral	BEL	2012	1.06489	2.51084	15.225	23.1299	0	0.471581	0.231874	0.0174447	0	0	0.00202486	0.378404	61.7215	230.783	0.00593969
CH4	EU+_WestCentral	CHE	2012	0.0224866	0.350267	3.02338	8.48425	0	0.747657	0.0229944	0.00574759	0	0	0.00517232	0.155856	23.7949	165.241	0.16821
CH4	EU+_WestCentral	DEU	2012	88.7065	33.0708	54.96	361.223	1.49807	5.29731	0.583005	0.103783	0	0	0.0782078	1.05895	488.609	1276.06	41.8527
CH4	EU+_WestCentral	FRA	2012	0.866311	8.80249	63.4412	56.5263	0.0111401	4.30119	1.68646	0.144156	0	0	0.0663069	0.887519	671.103	1528.89	4.40903
CH4	EU+_WestCentral	GBR	2012	6.21405	8.28829	34.6294	335.49	0	4.48529	0.866845	0.00502635	0	0	0.0806589	1.32568	994.119	999.092	8.32132
CH4	EU+_WestCentral	IRL	2012	0.269995	0.30819	7.06855	3.14109	0	0.578314	0.133224	0.000544024	0	0	0.000358185	0.0408128	14.6657	467.261	0.246225
CH4	EU+_WestCentral	LUX	2012	0.0644228	0.081001	0.392454	1.9116	0	0.0266488	0.00242657	8.21754e-05	0	0	3.53e-06	0.00887899	3.13814	16.6868	0
CH4	EU+_WestCentral	NLD	2012	3.5243	14.9711	64.6223	32.0561	1.68507	2.26575	0.261894	0.122233	0	0	0.000288862	0.199316	157.39	460.118	0.00437071
CH4	NON_EU	ALB	2012	1.0736	0.0156	1.12951	11.9806	0	0.1324	0.3098	0.0268	0	0	0	0.0152	39.8552	66.1934	0.573345
CH4	NON_EU	BIH	2012	3.2994	1.9716	7.10416	22.1678	0	0.2552	0.4638	0.1372	0	0	0	0.013	50.6656	43.6574	0.0190518
CH4	NON_EU	BLR	2012	34.1088	4.2476	39.7328	62.6436	0	2.295	0.9198	0.1332	0	0	0	0.2512	169.809	294.943	0.906307
CH4	NON_EU	KOS	2012	1.5336	0.0082	1.76973	4.5098	0	0.0626	0.356	0.1208	0	0	0	0.0434	18.97	18.0272	0.0654486
CH4	NON_EU	MDA	2012	7.3374	1.3462	11.2242	1.1792	0	0.2574	0.129	0.01	0	0	0	0.0194	61.8868	30.5368	0.636555
CH4	NON_EU	MKD	2012	1.9266	0.1548	2.76091	7.198	0	0.0924	0.0926	0.193	0	0	0	0.0084	24.0916	23.8666	0.075647
CH4	NON_EU	MNE	2012	0.5236	0.0016	0.618425	0.9478	0	0.0594	0.0802	0.0362	0	0	0	0.0138	10.002	7.1142	0.419531
CH4	NON_EU	RUS	2012	1037.2	161.631	863.935	8596.57	0	25.4344	5.5746	1.3156	0	0	0.074	1.788	3423.79	943.278	50.7703
CH4	NON_EU	SRB	2012	11.6746	3.4642	12.4423	39.956	0	0.415	0.4292	0.536	0	0	0	0.1966	80.7734	81.2154	0.58859
CH4	NON_EU	TUR	2012	38.2798	26.5832	91.6401	87.545	0	0.8994	5.649	4.6484	0	0	0.011	0.6656	936.441	934.492	42.2906
CH4	NON_EU	UKR	2012	47.0212	34.2554	154.712	1169.5	0	6.7072	1.853	0.2898	0	0	0	0.4374	629.892	490.962	47.0223
CH4	EU+_East	BGR	2013	0.291694	0.570907	12.3237	42.8538	0	0.323294	0.232039	0.401053	0	0	0.000526702	0.0347943	171.073	66.9835	5.76839
CH4	EU+_East	CZE	2013	1.14083	3.90057	36.165	174.614	0	0.926756	0.238531	0.0771677	0	0	5.358e-05	0.121684	201.001	136.499	0.016026
CH4	EU+_East	HUN	2013	0.846107	2.00326	28.6588	27.7054	0	0.725226	0.247323	0.0887288	0	0	2.865e-05	0.086282	139.296	101.27	0.851828
CH4	EU+_East	POL	2013	4.29843	6.76559	145.78	750.752	0	2.76408	1.25998	0.982975	0	0	0.000797447	0.329643	540.421	548.866	0.359183
CH4	EU+_East	ROU	2013	0.411268	1.60599	41.4532	437.677	0	0.99593	0.438088	0.0332381	0	0	0.00175766	0.0305127	213.098	489.404	5.65961
CH4	EU+_East	SVK	2013	0.465578	0.895478	10.2778	65.5703	0	0.244889	0.174184	0.0616065	0	0	6.214e-05	0.072789	60.0764	45.0051	0.00851729
CH4	EU+_East	SVN	2013	0.110653	0.166179	6.64525	12.166	0	0.209449	0.0478412	0.00648005	0	0	1.219e-05	0.0315637	21.4947	45.1614	0.0432541
CH4	EU+_North	DNK	2013	5.56774	0.325603	6.19792	4.30007	0.132446	0.398441	0.115946	0.000487814	0	0	0.00243815	0.208296	37.0352	222.244	0.0142328
CH4	EU+_North	EST	2013	0.539786	0.146658	4.97535	0.892505	0	0.122197	0.0386762	7e-06	0	0	6.74e-05	0.0187134	14.4271	25.5936	0.301494
CH4	EU+_North	FIN	2013	1.00203	0.792528	7.1522	1.56466	0.00555	0.455373	0.161676	0.00366453	0	0	0.003019	0.514546	88.1706	100.468	0.00836908
CH4	EU+_North	ISL	2013	0.00032304	0.122575	0.00117338	0.159568	0.00171796	0.0715828	0.0265466	0	0	0	0.0001374	0.00493361	9.53797	13.2608	0
CH4	EU+_North	LTU	2013	0.523939	0.221375	7.31185	9.64127	0	0.312843	0.212577	0.395926	0	0	1.2e-05	0.0242332	44.7103	74.2836	0.082147
CH4	EU+_North	LVA	2013	0.311697	0.492654	6.01005	4.03995	0	0.0882163	0.0570226	0.0290454	0	0	1.07e-05	0.108407	22.2601	36.9498	0.427776
CH4	EU+_North	NOR	2013	1.02542	1.2621	6.6999	35.352	0	0.609169	0.0595092	0.412367	0	0	0.0360134	0.78776	52.616	100.298	0.011319
CH4	EU+_North	SWE	2013	1.89435	1.30941	4.38573	2.80328	0	0.673351	0.0946937	0.0481809	0	0	0.0127804	0.485402	52.023	130.936	0.0121035
CH4	EU+_South	CYP	2013	0.109	0.026734	0.17643	0.00526	0	0.133746	0.0360684	0	0	0	6.7e-06	0.00088	20.1425	11.3358	0.0184915
CH4	EU+_South	ESP	2013	2.31482	45.7449	41.3532	39.4391	0	2.36381	0.695972	0.35054	0	0	0.0352915	0.214123	504.828	876.468	19.2395
CH4	EU+_South	GRC	2013	0.513104	0.388209	4.63858	51.0102	0	2.55641	0.426252	0.122262	0	0	0.0023684	0.142924	163.596	185.055	6.29701
CH4	EU+_South	HRV	2013	0.131808	0.193299	14.7336	8.18884	0	0.378984	0.128381	0.0341378	0	0	0.00022012	0.052235	69.4416	63.4266	0.00874143
CH4	EU+_South	ITA	2013	4.39448	15.7476	97.0423	230.906	0	6.37905	1.57874	1.46509	0	0	0.0370463	0.452943	661.257	700.211	68.2717
CH4	EU+_South	MLT	2013	0.0648081	0.00100121	0.0433702	0	0	0.0480777	0.0159034	5.01e-05	0	0	4.589e-06	0.000446347	4.71682	1.45205	0.0116007
CH4	EU+_South	PRT	2013	0.505977	3.44071	9.88021	2.69142	0.0388112	0.729602	0.315708	0.0546366	0	0	0.013086	0.0461644	203.201	164.652	6.00281
CH4	EU+_WestCentral	AUT	2013	0.896688	2.94569	12.1954	11.2225	0	0.405549	0.0704583	0.00466196	0	0	0.00426199	0.10236	62.8705	184.862	0.00100863
CH4	EU+_WestCentral	BEL	2013	1.02378	2.82573	16.88	22.9169	0	0.438112	0.212848	0.0151946	0	0	0.00219541	0.370176	55.2471	229.606	0.00593969
CH4	EU+_WestCentral	CHE	2013	0.0215679	0.322931	3.1457	7.90286	0	0.692085	0.0217629	0.00576195	0	0	0.00460798	0.138246	23.2666	163.851	0.16821
CH4	EU+_WestCentral	DEU	2013	96.1737	38.7897	48.4129	341.021	1.47578	5.18429	0.550927	0.0933429	0	0	0.0688263	0.993416	460.815	1291.31	50.2156
CH4	EU+_WestCentral	FRA	2013	0.854517	8.54311	65.7533	54.3817	0.0103905	4.02948	1.50014	0.142502	0	0	0.0659027	0.957954	651.589	1527.72	4.09086
CH4	EU+_WestCentral	GBR	2013	6.83182	8.79407	38.3198	290.188	0	4.05936	0.695209	0.0054421	0	0	0.0741383	1.24061	871.486	1000.17	8.30592
CH4	EU+_WestCentral	IRL	2013	0.258989	0.31597	7.56548	3.11367	0	0.538099	0.127472	0.000700652	0	0	0.000345161	0.0367231	20.9915	474.006	0.246225
CH4	EU+_WestCentral	LUX	2013	0.058628	0.0834815	0.420649	1.62764	0	0.0250244	0.00221346	5.6531e-05	0	0	3.37e-06	0.00852004	3.16219	17.1007	0
CH4	EU+_WestCentral	NLD	2013	3.1869	14.7699	65.1421	28.7019	1.7363	2.18056	0.239473	0.13117	0	0	0.000278045	0.190356	149.469	470.922	0.00437071
CH4	NON_EU	ALB	2013	1.0454	0.0144	1.12911	12.6264	0	0.1266	0.3302	0.0352	0	0	0	0.0138	38.5448	64.7276	0.573345
CH4	NON_EU	BIH	2013	3.1946	1.7654	7.21316	22.4272	0	0.2338	0.4912	0.1128	0	0	0	0.011	49.5864	42.4386	0.0190518
CH4	NON_EU	BLR	2013	36.2522	4.1854	39.2248	58.2764	0	1.899	0.8062	0.1298	0	0	0	0.2728	171.572	298.399	0.906307
CH4	NON_EU	KOS	2013	1.5004	0.0078	1.76513	4.4362	0	0.0584	0.381	0.1012	0	0	0	0.0416	19.131	17.9878	0.0654486
CH4	NON_EU	MDA	2013	7.4916	1.2348	11.0982	0.9708	0	0.2426	0.121	0.01	0	0	0	0.0166	64.8232	30.4022	0.636555
CH4	NON_EU	MKD	2013	1.8914	0.1552	2.88671	7.166	0	0.0796	0.0914	0.156	0	0	0	0.0076	24.3374	24.7984	0.075647
CH4	NON_EU	MNE	2013	0.5084	0.0014	0.617025	0.8932	0	0.0556	0.0848	0.0438	0	0	0	0.0132	10.167	7.2878	0.419531
CH4	NON_EU	RUS	2013	1047.46	162.296	822.402	8602.53	0	23.1936	5.4364	1.5274	0	0	0.077	2.297	3390.52	944.206	50.7703
CH4	NON_EU	SRB	2013	11.9384	3.1398	12.5737	39.88	0	0.392	0.4558	0.512	0	0	0	0.1874	82.0686	80.2976	0.58859
CH4	NON_EU	TUR	2013	39.1492	26.5548	97.0861	88.629	0	0.8026	6.043	4.8436	0	0	0.011	0.6614	945.453	922.988	42.2906
CH4	NON_EU	UKR	2013	43.5588	30.1306	150.378	1126.7	0	6.1758	1.915	0.1972	0	0	0	0.4216	639.786	489.741	47.0223
CH4	EU+_East	BGR	2014	0.323323	0.5715	11.1323	43.5703	0	0.359884	0.252046	0.442097	0	0	0.000550787	0.033383	166.252	67.5162	6.06704
CH4	EU+_East	CZE	2014	1.16039	4.24113	34.7663	172.246	0	0.827711	0.225342	0.0909611	0	0	5e-05	0.123454	201.942	138.942	0.016026
CH4	EU+_East	HUN	2014	0.948815	2.10757	23.3066	29.3793	0	0.714486	0.277282	0.0842256	0	0	2.622e-05	0.087026	135.122	104.431	0.787837
CH4	EU+_East	POL	2014	4.47908	6.90019	133.482	753.275	0	2.54963	1.1895	0.939537	0	0	0.000949555	0.317454	519.473	554.6	0.359183
CH4	EU+_East	ROU	2014	0.470407	1.52732	41.6554	422.339	0	1.02829	0.431363	0.0352239	0	0	0.00148158	0.0209461	212.453	500.636	5.87044
CH4	EU+_East	SVK	2014	0.542408	0.924717	7.46621	58.0662	0	0.206937	0.16607	0.0672908	0	0	6.5772e-05	0.0664431	60.6025	45.3882	0.00851729
CH4	EU+_East	SVN	2014	0.0929623	0.202897	5.3064	9.93378	0	0.1896	0.0417402	0.00753109	0	0	1.321e-05	0.0347188	20.0459	46.093	0.0432541
CH4	EU+_North	DNK	2014	3.98529	0.384469	5.5919	4.29452	0.112085	0.370946	0.103919	0.00174614	0	0	0.00184462	0.195221	37.098	223.244	0.0142328
CH4	EU+_North	EST	2014	0.568809	0.143974	4.89147	0.697675	0	0.116815	0.0345116	1e-05	0	0	6.88e-05	0.0220956	12.8365	25.8123	0.301494
CH4	EU+_North	FIN	2014	1.01325	0.832299	7.18124	1.2836	0.00471	0.435282	0.151198	0.00305084	0	0	0.003038	0.506688	83.0269	101.994	0.00836908
CH4	EU+_North	ISL	2014	0.000100936	0.109138	0.00228623	0.18175	0.00133818	0.0700317	0.0258246	0	0	0	0.0002823	0.00721955	9.40178	14.0939	0
CH4	EU+_North	LTU	2014	0.633732	0.197941	6.84067	11.258	0	0.283601	0.23907	0.38774	0	0	1.35e-05	0.0249688	42.0476	75.7656	0.082147
CH4	EU+_North	LVA	2014	0.366676	0.556844	5.78395	5.41265	0	0.0857251	0.0523337	0.0319662	0	0	9.02e-06	0.0978001	21.906	38.327	0.427776
CH4	EU+_North	NOR	2014	1.04528	1.2113	5.77512	39.9403	0	0.57118	0.0497536	0.431921	0	0	0.0411105	0.753209	50.8703	100.708	0.011319
CH4	EU+_North	SWE	2014	1.65795	1.24438	4.04406	2.59833	0	0.616589	0.0836178	0.0485616	0	0	0.0123732	0.477882	47.6746	130.924	0.0121035
CH4	EU+_South	CYP	2014	0.113	0.044251	0.15527	0.00519	0	0.129397	0.0326092	0	0	0	4.2e-06	0.00088	20.5193	10.9699	0.0184915
CH4	EU+_South	ESP	2014	2.3189	39.49	39.9353	36.8547	0	2.31397	0.638868	0.340436	0	0	0.0352557	0.208489	469.204	907.897	18.8825
CH4	EU+_South	GRC	2014	0.471665	0.433848	4.04732	47.8208	0	2.53477	0.361925	0.139063	0	0	0.00253211	0.0658907	166.111	178.217	6.09595
CH4	EU+_South	HRV	2014	0.0934149	0.174111	12.9774	7.64868	0	0.339568	0.115979	0.0391679	0	0	0.000213526	0.0507504	73.2377	62.431	0.00874143
CH4	EU+_South	ITA	2014	4.36393	16.1121	84.4649	220.742	0	6.26198	1.46496	1.49675	0	0	0.038729	0.454838	656.489	695.43	66.3563
CH4	EU+_South	MLT	2014	0.0634447	0.00095582	0.0499917	0	0	0.0468014	0.0163166	0.000129358	0	0	6.186e-06	0.00050137	5.32292	1.43787	0.0116007
CH4	EU+_South	PRT	2014	0.493222	3.65759	9.82533	2.61318	0.0263384	0.709007	0.29857	0.0524976	0	0	0.015222	0.0465516	197.738	165.421	5.68829
CH4	EU+_WestCentral	AUT	2014	0.858374	2.85697	10.1552	10.7759	0	0.383708	0.0633339	0.00437326	0	0	0.00388186	0.100135	58.6226	186.11	0.00100863
CH4	EU+_WestCentral	BEL	2014	0.933121	2.60423	13.3269	22.7132	0	0.44693	0.186397	0.0168112	0	0	0.00212928	0.368344	51.8304	232.726	0.00593969
CH4	EU+_WestCentral	CHE	2014	0.0135973	0.297463	2.40792	7.70629	0	0.612003	0.0210409	0.00561664	0	0	0.00485386	0.122492	22.8933	165.279	0.16821
CH4	EU+_WestCentral	DEU	2014	100.093	40.455	43.0371	310.056	1.44507	5.15152	0.53526	0.0908487	0	0	0.0694163	0.943644	433.61	1301.08	52.0783
CH4	EU+_WestCentral	FRA	2014	0.675336	8.43627	51.6363	49.0334	0.00947418	3.79264	1.31871	0.138699	0	0	0.0641611	0.807434	631.981	1560.3	3.38045
CH4	EU+_WestCentral	GBR	2014	7.51963	9.01432	34.66	276.617	0	3.90042	0.601322	0.00477496	0	0	0.0802939	1.28495	780.928	1019.34	8.41891
CH4	EU+_WestCentral	IRL	2014	0.265516	0.359514	6.59592	3.43422	0	0.501573	0.120003	0.00108206	0	0	0.000328468	0.0332883	28.4682	479.421	0.246225
CH4	EU+_WestCentral	LUX	2014	0.0768971	0.0865367	0.427513	1.53698	0	0.0246438	0.0023554	6.70875e-05	0	0	3.59e-06	0.00842817	3.18573	17.6533	0
CH4	EU+_WestCentral	NLD	2014	2.99092	15.0303	55.4674	27.6633	1.69495	2.07339	0.210714	0.163088	0	0	0.000285619	0.182613	140.032	474.508	0.00437071
CH4	NON_EU	ALB	2014	1.0172	0.0132	1.12871	13.2722	0	0.1208	0.3506	0.0436	0	0	0	0.0124	37.2344	63.2618	0.573345
CH4	NON_EU	BIH	2014	3.0898	1.5592	7.32216	22.6866	0	0.2124	0.5186	0.0884	0	0	0	0.009	48.5072	41.2198	0.0190518
CH4	NON_EU	BLR	2014	38.3956	4.1232	38.7168	53.9092	0	1.503	0.6926	0.1264	0	0	0	0.2944	173.335	301.856	0.906307
CH4	NON_EU	KOS	2014	1.4672	0.0074	1.76053	4.3626	0	0.0542	0.406	0.0816	0	0	0	0.0398	19.292	17.9484	0.0654486
CH4	NON_EU	MDA	2014	7.6458	1.1234	10.9722	0.7624	0	0.2278	0.113	0.01	0	0	0	0.0138	67.7596	30.2676	0.636555
CH4	NON_EU	MKD	2014	1.8562	0.1556	3.01251	7.134	0	0.0668	0.0902	0.119	0	0	0	0.0068	24.5832	25.7302	0.075647
CH4	NON_EU	MNE	2014	0.4932	0.0012	0.615625	0.8386	0	0.0518	0.0894	0.0514	0	0	0	0.0126	10.332	7.4614	0.419531
CH4	NON_EU	RUS	2014	1057.72	162.96	780.869	8608.48	0	20.9528	5.2982	1.7392	0	0	0.08	2.806	3357.26	945.133	50.7703
CH4	NON_EU	SRB	2014	12.2022	2.8154	12.7051	39.804	0	0.369	0.4824	0.488	0	0	0	0.1782	83.3638	79.3798	0.58859
CH4	NON_EU	TUR	2014	40.0186	26.5264	102.532	89.713	0	0.7058	6.437	5.0388	0	0	0.011	0.6572	954.466	911.483	42.2906
CH4	NON_EU	UKR	2014	40.0964	26.0058	146.044	1083.9	0	5.6444	1.977	0.1046	0	0	0	0.4058	649.681	488.519	47.0223
CH4	EU+_East	BGR	2015	0.326031	0.64989	11.1277	46.9446	0	0.351348	0.279517	0.448423	0	0	0.000585895	0.0340495	161.838	66.0645	6.55949
CH4	EU+_East	CZE	2015	1.22853	3.63224	35.217	167.573	0	0.760279	0.184511	0.11411	0	0	7.296e-05	0.132196	205.933	142.223	0.016026
CH4	EU+_East	HUN	2015	0.997548	2.34824	24.7841	25.7374	0	0.656525	0.257251	0.0949896	0	0	2.98e-05	0.0850876	132.713	107.844	0.895569
CH4	EU+_East	POL	2015	4.47878	7.04452	132.025	791.248	0	2.48559	1.1114	0.950894	0	0	0.000862874	0.311873	498	561.922	0.359183
CH4	EU+_East	ROU	2015	0.475013	1.59193	40.3787	399.529	0	0.925597	0.414211	0.0365734	0	0	0.00180707	0.021387	211.827	503.758	5.43783
CH4	EU+_East	SVK	2015	0.556024	0.994579	8.60629	63.1639	0	0.198481	0.140172	0.0710674	0	0	6.927e-05	0.0658829	61.9334	44.3695	0.00851729
CH4	EU+_East	SVN	2015	0.103799	0.197293	5.9466	10.1411	0	0.182469	0.0371445	0.0107773	0	0	1.394e-05	0.0343306	20.3162	47.5421	0.0432541
CH4	EU+_North	DNK	2015	3.37679	0.539047	5.80664	4.05688	0.142394	0.349333	0.0904414	0.00325375	0	0	0.00180063	0.181423	36.6925	221.441	0.0142328
CH4	EU+_North	EST	2015	0.592248	0.161328	4.75164	0.62026	0	0.114808	0.0317094	8e-06	0	0	6.92e-05	0.0217916	12.4918	24.7762	0.301494
CH4	EU+_North	FIN	2015	0.936922	0.821245	6.76049	1.46281	0.00595	0.416289	0.137543	0.00229241	0	0	0.003028	0.492484	80.3408	103.199	0.00836908
CH4	EU+_North	ISL	2015	0.000146378	0.12071	0.00102274	0.182232	0.00137759	0.0704638	0.0305167	0	0	0	0.0001432	0.00535903	9.21209	14.2653	0
CH4	EU+_North	LTU	2015	0.811569	0.19518	6.49282	11.7805	0	0.241546	0.21306	0.375058	0	0	1.1e-05	0.0224819	39.3227	76.1141	0.082147
CH4	EU+_North	LVA	2015	0.401678	0.554115	5.00613	4.11199	0	0.0819237	0.048955	0.0311015	0	0	1.14e-05	0.0906421	20.4081	38.3748	0.427776
CH4	EU+_North	NOR	2015	1.08379	1.24911	6.13936	36.5523	0	0.541688	0.237785	0.303882	0	0	0.0359883	0.727661	48.0741	101.657	0.011319
CH4	EU+_North	SWE	2015	1.65162	1.27012	3.88032	2.52595	0	0.568563	0.0782054	0.0591484	0	0	0.0117801	0.4718	44.2427	130.323	0.0121035
CH4	EU+_South	CYP	2015	0.117	0.051797	0.19782	0.00537	0	0.128502	0.0327366	0	0	0	6.3e-06	0.00044	20.9754	11.0873	0.0184915
CH4	EU+_South	ESP	2015	3.0518	39.8472	40.0392	33.0404	0	2.28711	0.563654	0.316919	0	0	0.0368999	0.21232	501.221	935.606	18.7914
CH4	EU+_South	GRC	2015	0.438203	0.474363	4.63322	44.0866	0	2.51154	0.386161	0.161616	0	0	0.00272921	0.0677	165.448	174.791	6.48553
CH4	EU+_South	HRV	2015	0.12867	0.153622	14.8857	8.08661	0	0.328185	0.111193	0.042013	0	0	0.0002155	0.0502961	74.826	65.4772	0.00874143
CH4	EU+_South	ITA	2015	4.20271	14.6837	94.3339	197.741	0	5.95774	1.39178	1.56317	0	0	0.0364698	0.446466	663.803	699.78	68.55
CH4	EU+_South	MLT	2015	0.0336581	0.00108665	0.0545701	0	0	0.0469978	0.0161182	0.000182316	0	0	5.367e-06	0.000574161	5.58745	1.50971	0.0116007
CH4	EU+_South	PRT	2015	0.552328	3.71978	9.77086	2.73732	0.0348185	0.675765	0.290536	0.0575403	0	0	0.0139467	0.0470539	186.702	167.966	5.91069
CH4	EU+_WestCentral	AUT	2015	0.909768	2.82074	10.7759	10.5061	0	0.373475	0.058769	0.00396117	0	0	0.0037764	0.0973399	55.1868	186.292	0.00100863
CH4	EU+_WestCentral	BEL	2015	1.01349	3.01726	15.2655	23.1916	0	0.459655	0.172453	0.0226627	0	0	0.00180268	0.215319	46.6588	233.764	0.00593969
CH4	EU+_WestCentral	CHE	2015	0.0133315	0.288899	2.54336	7.61806	0	0.54174	0.021348	0.00493539	0	0	0.00522637	0.105884	22.388	164.865	0.16821
CH4	EU+_WestCentral	DEU	2015	104.982	40.7618	46.7711	319.332	1.46389	4.87882	0.509115	0.0849221	0	0	0.0745621	1.27434	413.255	1295.79	54.059
CH4	EU+_WestCentral	FRA	2015	0.887948	8.21669	53.7888	48.1553	0.00866435	3.65617	1.19342	0.13485	0	0	0.0641946	0.728598	598.494	1561.6	3.26515
CH4	EU+_WestCentral	GBR	2015	9.0043	7.31816	37.4142	255.262	0	3.77842	0.500193	0.00420675	0	0	0.0652134	1.34064	771.399	1023.74	8.25855
CH4	EU+_WestCentral	IRL	2015	0.257408	0.369644	6.43575	3.52966	0	0.464491	0.112485	0.00124162	0	0	0.000345668	0.0323426	32.2554	489.364	0.246225
CH4	EU+_WestCentral	LUX	2015	0.080864	0.0815034	0.4644	1.38215	0	0.0232326	0.00258181	3.37455e-05	0	0	4.32e-06	0.00820228	3.03152	18.1624	0
CH4	EU+_WestCentral	NLD	2015	3.50064	15.0207	55.848	25.7755	1.71285	2.03704	0.209807	0.171196	0	0	0.000213504	0.168077	131.595	491.299	0.00437071
CH4	NON_EU	ALB	2015	0.989	0.012	1.12831	13.918	0	0.115	0.371	0.052	0	0	0	0.011	35.924	61.796	0.573345
CH4	NON_EU	BIH	2015	2.985	1.353	7.43116	22.946	0	0.191	0.546	0.064	0	0	0	0.007	47.428	40.001	0.0190518
CH4	NON_EU	BLR	2015	40.539	4.061	38.2088	49.542	0	1.107	0.579	0.123	0	0	0	0.316	175.098	305.313	0.906307
CH4	NON_EU	KOS	2015	1.434	0.007	1.75593	4.289	0	0.05	0.431	0.062	0	0	0	0.038	19.453	17.909	0.0654486
CH4	NON_EU	MDA	2015	7.8	1.012	10.8462	0.554	0	0.213	0.105	0.01	0	0	0	0.011	70.696	30.133	0.636555
CH4	NON_EU	MKD	2015	1.821	0.156	3.13831	7.102	0	0.054	0.089	0.082	0	0	0	0.006	24.829	26.662	0.075647
CH4	NON_EU	MNE	2015	0.478	0.001	0.614225	0.784	0	0.048	0.094	0.059	0	0	0	0.012	10.497	7.635	0.419531
CH4	NON_EU	RUS	2015	1067.99	163.625	739.336	8614.44	0	18.712	5.16	1.951	0	0	0.083	3.315	3323.99	946.061	50.7703
CH4	NON_EU	SRB	2015	12.466	2.491	12.8365	39.728	0	0.346	0.509	0.464	0	0	0	0.169	84.659	78.462	0.58859
CH4	NON_EU	TUR	2015	40.888	26.498	107.978	90.797	0	0.609	6.831	5.234	0	0	0.011	0.653	963.478	899.979	42.2906
CH4	NON_EU	UKR	2015	36.634	21.881	141.71	1041.1	0	5.113	2.039	0.012	0	0	0	0.39	659.576	487.298	47.0223
CH4	EU+_East	BGR	2016	0.328308	0.592666	11.6963	40.9744	0	0.309146	0.257952	0.430721	0	0	0.000694649	0.0311117	156.321	65.6607	6.40747
CH4	EU+_East	CZE	2016	1.27357	3.06905	35.317	154.598	0	0.74917	0.148224	0.1388	0	0	7.134e-05	0.135416	207.369	145.177	0.016026
CH4	EU+_East	HUN	2016	0.955206	2.17223	24.6081	28.3404	0	0.680907	0.210692	0.102681	0	0	2.835e-05	0.0850637	128.706	108.886	0.93472
CH4	EU+_East	POL	2016	3.93391	6.77619	139.336	792.741	0	2.6298	1.27741	1.00265	0	0	0.000812816	0.329615	475.108	555.244	0.359183
CH4	EU+_East	ROU	2016	0.455572	1.47514	40.7313	382.786	0	0.92147	0.42695	0.0411614	0	0	0.00303903	0.0202463	211.43	502.539	4.99293
CH4	EU+_East	SVK	2016	0.514324	0.812237	9.19826	66.7043	0	0.192879	0.103649	0.0420339	0	0	6.4559e-05	0.0678568	61.2298	43.6746	0.00851729
CH4	EU+_East	SVN	2016	0.108289	0.193679	6.20575	10.6896	0	0.181479	0.0378348	0.01289	0	0	1.432e-05	0.0334365	20.2241	48.3826	0.0432541
CH4	EU+_North	DNK	2016	3.89123	0.540153	5.69639	3.98334	0.0862807	0.326317	0.0789717	0.00579987	0	0	0.00194658	0.172798	37.6747	222.48	0.0142328
CH4	EU+_North	EST	2016	0.631264	0.156816	5.07649	0.681886	0	0.1125	0.0336391	0.000237	0	0	6.4e-05	0.021171	11.6811	24.2073	0.301494
CH4	EU+_North	FIN	2016	1.07164	0.826798	7.34519	1.31903	0.00606	0.396044	0.124217	0.00269095	0	0	0.00308	0.475991	74.9004	102.618	0.00836908
CH4	EU+_North	ISL	2016	8.92e-05	0.122741	0.000812465	0.141146	0.00130057	0.0742232	0.0354174	0	0	0	0.0001581	0.0060898	8.8566	14.4532	0
CH4	EU+_North	LTU	2016	0.848789	0.201547	6.49536	12.1704	0	0.24002	0.210907	0.355648	0	0	1e-05	0.0215543	38.0937	73.2008	0.082147
CH4	EU+_North	LVA	2016	0.50405	0.490658	4.96184	4.66315	0	0.0813474	0.0429313	0.0295895	0	0	1.48e-05	0.09062	21.81	38.4607	0.427776
CH4	EU+_North	NOR	2016	1.0982	1.1426	5.9241	34.564	0	0.495205	0.274151	0.316143	0	0	0.0333609	0.717478	45.7977	103.397	0.011319
CH4	EU+_North	SWE	2016	1.80297	1.27081	4.19716	2.48122	0	0.521585	0.0650141	0.0546975	0	0	0.0125713	0.468589	40.9915	130.12	0.0121035
CH4	EU+_South	CYP	2016	0.127	0.058998	0.19965	0.00582	0	0.131841	0.0373391	0	0	0	3.9e-06	0.00044	21.3897	11.8831	0.0184915
CH4	EU+_South	ESP	2016	2.53084	38.5382	40.3757	32.6993	0	2.36806	0.512736	0.360993	0	0	0.0396196	0.198289	490.164	948.891	19.9782
CH4	EU+_South	GRC	2016	0.421551	0.416124	4.21043	32.6868	0	2.17187	0.449766	0.16165	0	0	0.00287518	0.0546617	167.411	170.892	7.10703
CH4	EU+_South	HRV	2016	0.183739	0.133769	14.4613	8.11913	0	0.315348	0.10086	0.0434803	0	0	0.00021773	0.0496926	80.6704	64.8469	0.00874143
CH4	EU+_South	ITA	2016	4.28671	15.0851	91.651	188.413	0	5.47983	1.23335	1.52737	0	0	0.0360726	0.445174	651.523	713.489	70.3307
CH4	EU+_South	MLT	2016	0.0219873	0.00112169	0.0575223	0	0	0.0454146	0.0165343	0.000258828	0	0	5.748e-06	0.000474573	5.70081	1.49914	0.0116007
CH4	EU+_South	PRT	2016	0.556445	3.72039	9.78928	2.71751	0.038959	0.643016	0.272006	0.0492636	0	0	0.0171949	0.0471269	180.336	172.173	5.76001
CH4	EU+_WestCentral	AUT	2016	0.914778	2.79227	10.9091	10.4231	0	0.361309	0.0547958	0.00351707	0	0	0.000976676	0.0968374	51.6965	187.372	0.00100863
CH4	EU+_WestCentral	BEL	2016	0.970736	2.72645	16.5176	22.6063	0	0.471179	0.154385	0.0268854	0	0	0.00150596	0.208628	43.9983	235.05	0.00593969
CH4	EU+_WestCentral	CHE	2016	0.0144754	0.307154	2.60375	7.63699	0	0.549562	0.0212308	0.00460092	0	0	0.00453735	0.100722	21.9155	163.407	0.16821
CH4	EU+_WestCentral	DEU	2016	111.05	41.3989	47.7852	297.413	1.27991	4.84737	0.507759	0.0705779	0	0	0.0739056	1.23943	394.44	1283.21	53.7026
CH4	EU+_WestCentral	FRA	2016	1.20035	8.69955	55.9255	49.0382	0.00831503	3.62679	1.10241	0.135663	0	0	0.064776	0.716339	588.844	1552.18	3.36582
CH4	EU+_WestCentral	GBR	2016	9.34082	7.71429	38.8863	216.94	0	3.61909	0.391091	0.00316743	0	0	0.0654353	1.37393	744.406	1023.46	8.2365
CH4	EU+_WestCentral	IRL	2016	0.292198	0.367759	6.17051	3.61972	0	0.421935	0.0995215	0.00120429	0	0	0.000372944	0.0336537	33.193	504.384	0.246225
CH4	EU+_WestCentral	LUX	2016	0.0833342	0.0900514	0.509133	1.27013	0	0.0222148	0.00263775	3.55617e-05	0	0	4.35e-06	0.00812433	2.93333	18.4853	0
CH4	EU+_WestCentral	NLD	2016	3.63963	15.0749	54.1526	24.3274	1.73432	2.02509	0.18291	0.180025	0	0	0.000209794	0.156757	124.86	506.613	0.00437071
CH4	NON_EU	ALB	2016	1.052	0.0166	1.13091	14.6066	0	0.108	0.3758	0.0448	0	0	0	0.011	36.8856	62.7526	0.573345
CH4	NON_EU	BIH	2016	3.1538	1.4	7.53016	22.3414	0	0.1774	0.5568	0.0572	0	0	0	0.007	47.6516	41.1236	0.0190518
CH4	NON_EU	BLR	2016	39.907	4.1532	40.4472	47.7112	0	1.1014	0.5908	0.1156	0	0	0	0.3152	173.33	308.766	0.906307
CH4	NON_EU	KOS	2016	1.5254	0.0068	1.75553	4.2282	0	0.0474	0.444	0.0596	0	0	0	0.0376	19.6152	17.897	0.0654486
CH4	NON_EU	MDA	2016	7.7638	1.0656	11.395	0.5554	0	0.2008	0.1062	0.0114	0	0	0	0.011	72.241	30.0084	0.636555
CH4	NON_EU	MKD	2016	1.9026	0.1636	3.25091	7.2034	0	0.0522	0.0984	0.0764	0	0	0	0.0058	24.934	26.8582	0.075647
CH4	NON_EU	MNE	2016	0.5056	0.001	0.613625	0.7924	0	0.0452	0.0952	0.0572	0	0	0	0.012	10.6012	7.7198	0.419531
CH4	NON_EU	RUS	2016	1059.39	168.079	755.236	8587.99	0	17.672	5.2628	2.2878	0	0	0.0834	3.3534	3325.02	946.934	50.7703
CH4	NON_EU	SRB	2016	12.5354	2.5636	13.0811	39.4842	0	0.3216	0.5204	0.434	0	0	0	0.167	87.1724	78.5946	0.58859
CH4	NON_EU	TUR	2016	40.777	26.9128	108.874	91.4152	0	0.5736	6.814	5.3014	0	0	0.0112	0.6814	980.96	916.894	42.2906
CH4	NON_EU	UKR	2016	36.598	22.576	144.553	1035.24	0	4.792	2.0388	0.0134	0	0	0.0002	0.3854	632.492	486.1	47.0223
CH4	EU+_East	BGR	2017	0.316582	0.567424	12.5182	42.4688	0	0.292266	0.222759	0.397322	0	0	0.000688199	0.032302	144.407	65.3144	5.84765
CH4	EU+_East	CZE	2017	1.30641	4.28609	36.5235	140.155	0	0.71268	0.140161	0.13345	0	0	7.019e-05	0.145261	210.043	146.922	0.016026
CH4	EU+_East	HUN	2017	0.984127	2.44948	23.6905	34.5668	0	0.63841	0.195994	0.102356	0	0	2.566e-05	0.0842007	128.793	109.288	0.885309
CH4	EU+_East	POL	2017	3.49759	7.75326	137.16	785.506	0	2.88423	1.5777	1.02863	0	0	0.000928175	0.39272	458.169	577.508	0.359183
CH4	EU+_East	ROU	2017	0.421065	1.35933	41.2566	382.986	0	0.891642	0.436073	0.0473665	0	0	0.00457904	0.0205877	212.804	493.408	4.91009
CH4	EU+_East	SVK	2017	0.517458	0.959299	8.49851	68.4325	0	0.182683	0.0984706	0.0371891	0	0	6.628e-05	0.0664611	61.8023	43.4447	0.00851729
CH4	EU+_East	SVN	2017	0.118075	0.206905	5.85992	10.7701	0	0.162885	0.0354579	0.0131526	0	0	1.207e-05	0.0341452	19.4069	47.4603	0.0432541
CH4	EU+_North	DNK	2017	3.99554	0.715891	5.59684	3.97938	0.0914668	0.310884	0.068616	0.0103214	0	0	0.00161176	0.171485	38.5192	221.718	0.0142328
CH4	EU+_North	EST	2017	0.750895	0.229991	5.07998	0.647645	0	0.110273	0.029191	0.000319	0	0	7.2e-05	0.0210619	11.3273	24.6401	0.301494
CH4	EU+_North	FIN	2017	1.1082	0.834115	7.21399	1.20712	0.00584	0.372055	0.111332	0.00204534	0	0	0.0032	0.474732	70.6534	102.012	0.00836908
CH4	EU+_North	ISL	2017	7.18e-05	0.127149	0.0014372	0.133177	0.00123786	0.0678989	0.0389491	0	0	0	0.00016071	0.00631517	8.53879	14.2765	0
CH4	EU+_North	LTU	2017	0.926517	0.208661	6.43396	12.0408	0	0.225495	0.186109	0.33252	0	0	1.05e-05	0.0226495	38.8428	71.0703	0.082147
CH4	EU+_North	LVA	2017	0.569419	0.502997	5.47981	6.1074	0	0.0759436	0.0493241	0.02841	0	0	2.23e-05	0.0880946	20.5058	38.7569	0.427776
CH4	EU+_North	NOR	2017	1.11694	1.17247	6.39233	34.2084	0	0.467118	0.259196	0.375437	0	0	0.0355311	0.694356	43.3802	104.455	0.011319
CH4	EU+_North	SWE	2017	1.82425	1.26368	4.31105	2.40023	0	0.487989	0.0470609	0.054362	0	0	0.0115733	0.469788	38.3227	131.346	0.0121035
CH4	EU+_South	CYP	2017	0.1275	0.077976	0.21518	0.00606	0	0.128605	0.0334922	0	0	0	5.7e-06	0.00075	21.7077	12.2513	0.0184915
CH4	EU+_South	ESP	2017	2.86796	43.4547	40.821	31.393	0	2.38915	0.467005	0.383448	0	0	0.0417676	0.192469	486.995	968.585	19.9782
CH4	EU+_South	GRC	2017	0.47548	0.444682	4.6688	37.9751	0	2.22882	0.514043	0.153078	0	0	0.00282661	0.0889888	171.976	170.197	7.23563
CH4	EU+_South	HRV	2017	0.242147	0.158768	14.0571	8.01181	0	0.296638	0.103352	0.0438106	0	0	0.000219928	0.0496045	80.1261	61.2234	0.00874143
CH4	EU+_South	ITA	2017	4.3273	14.6168	99.4237	188.343	0	5.10651	1.05978	1.5109	0	0	0.0366083	0.429342	650.879	721.34	67.529
CH4	EU+_South	MLT	2017	0.0367611	0.00116515	0.0558647	0	0	0.14706	0.0136908	0.000243007	0	0	3.174e-06	0.000499514	5.78896	1.44537	0.0116007
CH4	EU+_South	PRT	2017	0.60487	3.76638	9.79056	2.84007	0.0456346	0.631518	0.236153	0.0498462	0	0	0.0194596	0.0492662	177.837	176.225	5.83468
CH4	EU+_WestCentral	AUT	2017	0.918465	2.80731	11.0046	11.5533	0	0.347139	0.0512436	0.00339682	0	0	0.000864108	0.0965586	48.7496	188.295	0.00100863
CH4	EU+_WestCentral	BEL	2017	0.993058	2.46415	16.0823	22.2638	0	0.43915	0.16116	0.0283077	0	0	0.00150287	0.200412	42.5189	233.533	0.00593969
CH4	EU+_WestCentral	CHE	2017	0.0144472	0.309517	2.43572	7.67678	0	0.483858	0.0222094	0.00451283	0	0	0.00436916	0.096592	21.3743	161.609	0.16821
CH4	EU+_WestCentral	DEU	2017	113.823	41.8947	47.0027	297.78	1.33134	4.83885	0.500607	0.0599182	0	0	0.0697696	1.28822	373.877	1273.06	54.3994
CH4	EU+_WestCentral	FRA	2017	1.40267	8.34154	53.3794	45.1022	0.00755545	3.57577	1.03224	0.144041	0	0	0.0656238	0.638934	593.862	1536.56	3.44826
CH4	EU+_WestCentral	GBR	2017	9.87975	7.65861	38.5451	216.643	0	3.40308	0.313949	0.00286352	0	0	0.0620858	1.42575	755.167	1027.41	8.21247
CH4	EU+_WestCentral	IRL	2017	0.357256	0.405373	5.57316	3.69265	0	0.354396	0.0886549	0.000622858	0	0	0.000372184	0.0346187	32.152	518.682	0.246225
CH4	EU+_WestCentral	LUX	2017	0.104165	0.089216	0.520744	1.25105	0	0.0218188	0.0023729	2.85373e-05	0	0	4.15e-06	0.00810626	2.98516	18.75	0
CH4	EU+_WestCentral	NLD	2017	3.44473	15.3713	58.081	21.5224	1.75011	2.08991	0.188152	0.17172	0	0	0.000224989	0.153827	116.554	501.521	0.00437071
CH4	NON_EU	ALB	2017	1.115	0.0212	1.13351	15.2952	0	0.101	0.3806	0.0376	0	0	0	0.011	37.8472	63.7092	0.573345
CH4	NON_EU	BIH	2017	3.3226	1.447	7.62916	21.7368	0	0.1638	0.5676	0.0504	0	0	0	0.007	47.8752	42.2462	0.0190518
CH4	NON_EU	BLR	2017	39.275	4.2454	42.6856	45.8804	0	1.0958	0.6026	0.1082	0	0	0	0.3144	171.562	312.22	0.906307
CH4	NON_EU	KOS	2017	1.6168	0.0066	1.75513	4.1674	0	0.0448	0.457	0.0572	0	0	0	0.0372	19.7774	17.885	0.0654486
CH4	NON_EU	MDA	2017	7.7276	1.1192	11.9438	0.5568	0	0.1886	0.1074	0.0128	0	0	0	0.011	73.786	29.8838	0.636555
CH4	NON_EU	MKD	2017	1.9842	0.1712	3.36351	7.3048	0	0.0504	0.1078	0.0708	0	0	0	0.0056	25.039	27.0544	0.075647
CH4	NON_EU	MNE	2017	0.5332	0.001	0.613025	0.8008	0	0.0424	0.0964	0.0554	0	0	0	0.012	10.7054	7.8046	0.419531
CH4	NON_EU	RUS	2017	1050.78	172.532	771.136	8561.54	0	16.632	5.3656	2.6246	0	0	0.0838	3.3918	3326.05	947.808	50.7703
CH4	NON_EU	SRB	2017	12.6048	2.6362	13.3257	39.2404	0	0.2972	0.5318	0.404	0	0	0	0.165	89.6858	78.7272	0.58859
CH4	NON_EU	TUR	2017	40.666	27.3276	109.77	92.0334	0	0.5382	6.797	5.3688	0	0	0.0114	0.7098	998.442	933.809	42.2906
CH4	NON_EU	UKR	2017	36.562	23.271	147.396	1029.39	0	4.471	2.0386	0.0148	0	0	0.0004	0.3808	605.407	484.902	47.0223
CO	EU+_East	BGR	2000	0.753963	13.1063	127.984	0.0638762	0	163.956	9.1979	28.0936	0	0.0271222	0.317805	3.1599	0.00903622	0	18.639
CO	EU+_East	CZE	2000	11.0217	143.58	490.853	0.001224	1.07762	371.828	17.7779	7.33027	0	0.00471965	0.0893642	30.9168	0.0456878	0	0.143
CO	EU+_East	HUN	2000	11.8936	85.1608	236.991	0.170529	0.974823	448.012	26.123	5.2978	0	0.0757984	0.286523	11.4023	3.36465	0	1.238
CO	EU+_East	POL	2000	42.019	383.905	1528.37	0.219288	0.0368285	1063.18	42.5154	156.407	0	0.022991	0.405406	121.086	14.9038	0	3.205
CO	EU+_East	ROU	2000	10.2914	106.891	462.722	4.39136	2.42788	311.227	18.0407	3.49106	0	0.184862	0.241973	131.706	8.32919	0	22.056
CO	EU+_East	SVK	2000	2.62451	125.443	233.061	0	0.296114	159.041	8.6953	0.574504	0	0.0265833	0.0660237	16.4775	0.00873545	0	0.076
CO	EU+_East	SVN	2000	0.807239	15.2959	62.3694	0.000373918	0.208082	95.4537	4.50604	0.00170549	0	0	1.33191	7.69099	0.00144906	0	0.385957
CO	EU+_North	DNK	2000	10.6944	18.9242	87.4178	0.523535	3.59012	260.303	18.7976	0.00982442	0	0	1.66468	56.7184	1.12021	0	0.127
CO	EU+_North	EST	2000	8.25	14.12	103.946	0.2	0.107882	62.6672	3.62534	0	0	0	0.081835	5.48109	0.008417	0	2.69024
CO	EU+_North	FIN	2000	9.13032	61.2994	125.444	0	0.263268	259.394	28.7075	0.0639452	0	0.0165248	0.934437	82.9445	0	0	0.0746775
CO	EU+_North	ISL	2000	0.00505589	27.9888	0.0234489	0	0.0274861	21.3195	0.550167	0	0	0	0.189383	0.666749	0.91179	0	0
CO	EU+_North	LTU	2000	3.15121	3.80728	101.788	0	0.221657	42.3341	7.28193	10.2643	0	0.011325	0.239543	4.19557	0.00241879	0	0.733
CO	EU+_North	LVA	2000	1.49806	2.51732	120.006	0	25.1562	91.891	7.34933	3.86598	0	0	0.0896872	7.0981	0.000651694	0	4.66061
CO	EU+_North	NOR	2000	0.723323	175.579	167.829	1.35676	0.566918	175.778	28.3578	1.44482	0	0	2.45651	110.574	0.0454455	0	0.101
CO	EU+_North	SWE	2000	3.20699	28.2037	122.757	0.00814558	0.326756	348.606	20.8652	0	0	0	1.4363	121.188	0.616709	0	0.108
CO	EU+_South	CYP	2000	0.569326	2.38027	0.518792	0.016554	0.58958	20.7094	3.8176	0.00147411	0	0	0.177409	0.264102	0.0315014	0	0.165
CO	EU+_South	ESP	2000	12.2266	496.246	396.463	0.700979	1.1832	932.121	140.943	0.269187	0	0	4.81157	49.9554	0.371404	0	10.634
CO	EU+_South	GRC	2000	25.1538	63.3905	71.1849	0	2.44757	605.28	28.154	1.25987	0	0	1.26233	45.8061	5.854e-06	0	6.041
CO	EU+_South	HRV	2000	1.47011	94.5241	162.826	0.318993	0.750613	162.718	8.63359	0.367756	0	0.00423896	0.279195	18.5722	0.000713759	0	0.078
CO	EU+_South	ITA	2000	27.5932	468.659	913.07	0	0	2766.93	192.631	167.745	0	0.00718468	5.59438	171.403	45.3776	0	16.236
CO	EU+_South	MLT	2000	0.372876	0.0440338	0.055935	0	0.112638	16.0914	0.733445	0	0	0	0.195509	0	0	0	0.103513
CO	EU+_South	PRT	2000	2.58986	125.052	162.57	0.100434	1.29986	301.339	52.8248	2.62937	0	0	5.35834	2.3148	0.0129548	0	2.061
CO	EU+_WestCentral	AUT	2000	1.87666	194.751	290.599	0	0.866562	158.033	23.9033	0	0	0.0629378	3.49108	44.8066	7.52093	0	0.009
CO	EU+_WestCentral	BEL	2000	4.18065	560.692	79.4581	0.255159	1.56521	200.92	38.014	10.0449	0	1.18704	2.45179	34.4697	0.844653	0	0.053
CO	EU+_WestCentral	CHE	2000	1.09507	19.35	79.6019	0.04649	1.5901	214.709	9.06275	0.014536	0	0.00165248	4.34609	44.7351	1.38564	0	1.50094
CO	EU+_WestCentral	DEU	2000	99.4673	1207.88	929.225	1.21587	38.1724	1983.67	176.75	0.865647	0	10.7443	23.8464	346.933	23.081	0	0.73
CO	EU+_WestCentral	FRA	2000	12.8121	1656.59	1861.92	1.42922	7.59071	2084.97	360.695	18.7078	0	0.303581	8.40867	214.004	13.8573	0	1.706
CO	EU+_WestCentral	GBR	2000	66.0444	686.864	561.388	13.1533	2.54519	2497.98	198.481	1.45794	0	0.00718468	55.2605	310.813	25.9699	0	0.175
CO	EU+_WestCentral	IRL	2000	22.4886	8.75305	29.6266	0	0.448941	163.145	15.7439	0.334454	0	0	1.06111	4.03393	0.001708	0	2.19707
CO	EU+_WestCentral	LUX	2000	0.0677272	2.2347	3.28201	0	0.023069	10.7234	1.2287	0.0314062	0	0.013579	0.479098	2.65678	0	0	0
CO	EU+_WestCentral	NLD	2000	15.7673	162.078	85.6723	0	2.11196	335.251	34.82	29.3886	0	6.80472	3.72501	77.1777	7.2976	0	0.039
CO	NON_EU	ALB	2000	0.035	1.30165	44.1041	0.073	0	15.9442	11.615	0	0	0	0	1.158	4.76241	0	0.824
CO	NON_EU	BIH	2000	1.61169	18.5545	228.86	0	0	43.1327	23.6203	0	0	0	0	0.0758824	10.6396	0	0.17
CO	NON_EU	BLR	2000	14.6055	9.81212	164.546	1.067	0	388.709	48.4135	2.31312	0	0.0447458	0	100.73	18.0403	0	8.087
CO	NON_EU	KOS	2000	0.715	0.2762	62.7768	0	0	2.31409	5.59931	0	0	0	0	4.48247	5.337	0	0.584
CO	NON_EU	MDA	2000	1.87581	4.20492	56.7117	0.002	0	14.8034	2.8081	0.402789	0	0	0	8.456	16.626	0	5.68
CO	NON_EU	MKD	2000	1.65222	2.17148	73.3385	0	0	13.8135	5.64938	0.11576	0	0	0	0.0987441	5.90399	0	0.675
CO	NON_EU	MNE	2000	0.155	42.5979	22.3903	0	0	2.1029	1.06165	0	0	0	0	1.45367	2.314	0	3.74349
CO	NON_EU	RUS	2000	213.52	1018.7	3024.02	52.0731	0	5490.46	285.13	15.0542	0	2.13	0	369.542	172.455	0	453.025
CO	NON_EU	SRB	2000	5.67112	22.2031	302.956	0.605	0	45.2212	8.93151	0.753212	0	0.04461	0	17.5209	13.5091	0	5.252
CO	NON_EU	TUR	2000	14.5301	225.804	1493.94	0.060583	0	678.997	321.678	0.111187	0	0	0	276.901	163.729	0	227.141
CO	NON_EU	UKR	2000	54.2864	895.917	1024.7	0.32292	0	1275.93	75.4625	0.745553	0	0.39	0	93.7793	107.804	0	374.511
CO	EU+_East	BGR	2001	0.857643	15.1261	108.68	0.0649611	0	139.536	8.8563	24.2235	0	0.0144824	0.265579	2.91128	0.00599786	0	18.639
CO	EU+_East	CZE	2001	10.3527	142.455	505.074	0.0453732	0.947469	344.753	17.2648	6.81941	0	0.00399992	0.1072	30.2039	0.0726525	0	0.143
CO	EU+_East	HUN	2001	12.3214	79.2076	264.234	0.171851	1.06226	437.227	25.7933	5.15852	0	0.0732987	0.271174	10.564	3.1924	0	1.238
CO	EU+_East	POL	2001	40.6066	340.223	1655.82	0.215544	0.0284589	862.915	38.1745	125.862	0	0.0222328	0.404726	112.984	17.4963	0	3.205
CO	EU+_East	ROU	2001	10.1669	112.694	462.718	4.28318	2.42788	311.73	18.0698	3.4967	0	0.178765	0.241973	126.08	8.30097	0	22.056
CO	EU+_East	SVK	2001	2.84756	120.767	226.408	0	0.371764	186.139	9.7519	0.674015	0	0.0257067	0.067684	15.6698	0.00849545	0	0.076
CO	EU+_East	SVN	2001	0.982867	16.6373	62.0473	0.000319385	0.208525	88.7453	4.51527	0.00158362	0	0	1.15977	7.48018	0.00152488	0	0.385957
CO	EU+_North	DNK	2001	11.1036	17.2727	90.2202	0.540473	3.04424	249.555	19.1764	0.0100502	0	0	1.63609	56.0305	1.08482	0	0.127
CO	EU+_North	EST	2001	7.28	17.87	99.1091	0.18	0.117962	66.6098	3.75447	0	0	0	0.077537	5.32855	0.006076	0	2.69024
CO	EU+_North	FIN	2001	10.4458	54.0781	141.33	0	0.263495	250.727	27.0488	0.0608635	0	0.0159798	0.959705	83.8835	0	0	0.0746775
CO	EU+_North	ISL	2001	0.00489877	30.2456	0.0202517	0	0.0263412	19.0477	0.520597	0	0	0	0.162783	0.652236	0.817619	0	0
CO	EU+_North	LTU	2001	3.49407	4.52586	101.818	0	0.221657	41.9615	7.21785	10.174	0	0.0109515	0.239543	4.18294	0.00241174	0	0.733
CO	EU+_North	LVA	2001	1.69132	3.06666	133.222	0	14.1044	94.9207	7.81792	4.01684	0	0	0.0898352	6.44269	0.0011456	0	5.6076
CO	EU+_North	NOR	2001	1.09955	176.169	168.998	1.49682	0.635985	160.024	25.7693	1.30747	0	0	2.3425	113.115	0.0442387	0	0.101
CO	EU+_North	SWE	2001	3.92217	29.1665	117.287	0.00833022	0.323513	316.908	19.0016	0	0	0	1.43691	120.336	0.625519	0	0.108
CO	EU+_South	CYP	2001	0.56507	2.33328	0.557355	0.016309	0.181676	20.3498	3.67087	0.00140333	0	0	0.195156	0.266383	0.0318627	0	0.165
CO	EU+_South	ESP	2001	12.5922	503.25	404.922	0.664108	2.22782	842.544	130.621	0.264565	0	0	4.9873	50.2217	0.417811	0	10.634
CO	EU+_South	GRC	2001	25.2656	64.1661	66.0976	0	8.55712	601.232	28.4424	1.23487	0	0	1.15204	45.1965	5.854e-06	0	6.041
CO	EU+_South	HRV	2001	1.00098	82.5273	178.209	0.310249	0.985699	145.72	7.34407	0.248735	0	0.00409917	0.39841	17.6577	0.000723346	0	0.078
CO	EU+_South	ITA	2001	27.5495	463.887	862.831	0	0	2551.54	179.872	150.307	0	0.00694775	5.35992	149.728	44.0302	0	16.236
CO	EU+_South	MLT	2001	0.3943	0.0440338	0.0559641	0	0.112638	15.2637	0.695718	0	0	0	0.195509	0	0	0	0.103513
CO	EU+_South	PRT	2001	2.79433	115.301	155.646	0.117486	1.31356	257.343	48.8511	2.26192	0	0	5.18021	2.33197	0.00747677	0	2.061
CO	EU+_WestCentral	AUT	2001	2.26523	167.313	302.122	0	0.849082	154.055	24.3432	0	0	0.0608622	3.27706	44.2775	7.2145	0	0.009
CO	EU+_WestCentral	BEL	2001	3.30865	524.775	86.2681	0.187479	1.48827	185.046	36.9118	9.09968	0	1.2179	2.3669	34.1728	0.76706	0	0.053
CO	EU+_WestCentral	CHE	2001	1.06259	16.9653	80.9682	0.04927	1.62224	198.969	8.25035	0.0132463	0	0.00159798	4.06021	44.0551	1.33045	0	1.50094
CO	EU+_WestCentral	DEU	2001	100.255	1143.95	990.941	1.10688	39.4664	1825.26	160.737	0.787043	0	10.1325	21.521	348.522	22.883	0	0.73
CO	EU+_WestCentral	FRA	2001	12.3677	1481.98	1848.09	1.44968	6.91198	1935.24	344.898	17.0606	0	0.254215	8.02685	210.718	13.6769	0	1.706
CO	EU+_WestCentral	GBR	2001	67.0262	699.626	554.663	13.4265	2.49237	2505.36	180.566	1.36688	0	0.00694775	59.843	309.549	47.776	0	0.175
CO	EU+_WestCentral	IRL	2001	23.8212	9.55407	28.5093	0	0.44543	158.631	15.0594	0.325194	0	0	1.0664	4.01776	0.0142768	0	2.19707
CO	EU+_WestCentral	LUX	2001	0.0874153	5.62685	3.43193	0	0.0233502	9.94371	1.16967	0.0288053	0	0.0128881	0.498331	2.64019	0	0	0
CO	EU+_WestCentral	NLD	2001	12.5442	161.215	84.7785	0	1.98523	340.041	32.351	29.7687	0	6.66354	3.51868	77.4449	7.46176	0	0.039
CO	NON_EU	ALB	2001	0.0336	1.16412	44.1029	0.073	0	16.6276	12.1128	0	0	0	0	1.0936	4.82873	0	0.824
CO	NON_EU	BIH	2001	1.66075	18.7534	229.696	0	0	39.5316	21.6482	0	0	0	0	0.0779059	10.8971	0	0.17
CO	NON_EU	BLR	2001	14.616	9.95429	165.035	1.067	0	365.213	45.487	2.17329	0	0.0447458	0	93.0714	18.7844	0	8.087
CO	NON_EU	KOS	2001	0.715	0.27796	62.7768	0	0	3.17807	7.68985	0	0	0	0	7.39257	5.337	0	0.584
CO	NON_EU	MDA	2001	1.82205	4.23994	56.7619	0.002	0	16.7675	3.18068	0.456231	0	0	0	7.5162	17.6158	0	5.68
CO	NON_EU	MKD	2001	1.62037	2.30719	73.3391	0	0	12.8646	5.2613	0.107808	0	0	0	0.100795	5.94119	0	0.675
CO	NON_EU	MNE	2001	0.155	42.5973	22.3903	0	0	2.69292	1.35952	0	0	0	0	2.47153	2.314	0	3.74349
CO	NON_EU	RUS	2001	215.485	1026.36	3017.93	60.2207	0	5273.22	273.848	14.4586	0	2.13	0	395.177	171.601	0	453.025
CO	NON_EU	SRB	2001	5.4805	22.5859	301.825	0.605	0	54.2604	10.7168	0.90377	0	0.04461	0	29.4837	13.5401	0	5.252
CO	NON_EU	TUR	2001	14.5395	226.59	1497.48	0.0624664	0	626.249	296.689	0.10255	0	0	0	273.317	167.543	0	227.141
CO	NON_EU	UKR	2001	52.9827	930.289	1017.51	0.329336	0	1278.13	75.593	0.746843	0	0.39	0	100.566	109.088	0	374.511
CO	EU+_East	BGR	2002	0.912545	14.0445	150.37	0.062876	0	143.449	8.899	25.1211	0	0.0187741	0.277816	2.9476	0.00587431	0	18.639
CO	EU+_East	CZE	2002	10.3608	142.019	488.564	0.032418	1.07587	321.974	16.9638	6.38145	0	0.00396257	0.108652	30.2856	0.0607026	0	0.143
CO	EU+_East	HUN	2002	12.1034	50.8833	178.313	0.157898	1.11265	405.297	24.609	4.7943	0	0.070799	0.255824	10.6175	3.11939	0	1.238
CO	EU+_East	POL	2002	40.1884	317.264	1778.65	0.21342	0.028292	777.075	34.255	114.784	0	0.0214746	0.523876	112.571	15.9653	0	3.205
CO	EU+_East	ROU	2002	10.0424	118.497	462.715	4.175	2.42788	312.233	18.099	3.50234	0	0.172669	0.241973	120.454	8.27275	0	22.056
CO	EU+_East	SVK	2002	3.18219	126.474	156.537	0	0.328796	170.251	9.86363	0.621917	0	0.02483	0.0726766	15.6904	0.00883268	0	0.076
CO	EU+_East	SVN	2002	1.21981	21.7182	65.0938	0.000319385	0.200627	76.4547	4.1188	0.0013594	0	0	1.16344	8.16489	0.00165377	0	0.385957
CO	EU+_North	DNK	2002	10.878	15.8824	88.4508	0.500928	4.26342	229.861	18.1128	0.00948427	0	0	1.54286	56.2225	1.09766	0	0.127
CO	EU+_North	EST	2002	6.28	20.34	96.8261	0.27	0.13787	55.3612	3.59018	0	0	0	0.103658	6.87801	0.006585	0	2.69024
CO	EU+_North	FIN	2002	11.1862	52.2064	147.274	0	0.269113	230.005	25.1661	0.0557591	0	0.0154349	0.915615	85.6985	0	0	0.0746775
CO	EU+_North	ISL	2002	0.00532582	32.5544	0.0185101	0	0.0305874	17.2237	0.498941	0	0	0	0.144212	0.61081	0.762982	0	0
CO	EU+_North	LTU	2002	3.83692	5.24445	101.849	0	0.221657	41.589	7.15376	10.0837	0	0.0105781	0.239543	4.1703	0.00240469	0	0.733
CO	EU+_North	LVA	2002	1.69235	2.81642	128.902	0	15.1081	82.8685	7.06272	3.52599	0	0	0.0933714	6.95062	0.000303097	0	8.12426
CO	EU+_North	NOR	2002	1.35744	173.972	183.369	0.958758	0.635303	144.741	23.1788	1.17486	0	0	2.06385	113.386	0.0456243	0	0.101
CO	EU+_North	SWE	2002	4.56509	28.7528	116.532	0.0105031	0.334106	283.748	17.2647	0	0	0	1.31898	120.906	0.629969	0	0.108
CO	EU+_South	CYP	2002	0.588496	2.39906	0.528702	0.0153269	0.170089	19.8239	3.3583	0.00124918	0	0	0.192583	0.271757	0.0322331	0	0.165
CO	EU+_South	ESP	2002	14.8486	512.707	405.94	0.678586	2.28209	731.959	118.823	0.228633	0	0	4.86429	49.6834	0.48922	0	10.634
CO	EU+_South	GRC	2002	24.8806	58.2813	52.1848	0	5.69506	562.854	28.5013	1.1184	0	0	1.03297	46.8473	1.29676e-05	0	6.041
CO	EU+_South	HRV	2002	0.86547	86.0269	170.979	0.297655	1.07037	132.966	7.98813	0.31511	0	0.00395938	0.271218	15.4029	0.000640083	0	0.078
CO	EU+_South	ITA	2002	28.7672	432.753	538.088	0	0	2362.6	169.478	134.738	0	0.00671081	5.34774	128.352	47.199	0	16.236
CO	EU+_South	MLT	2002	0.415725	0.0440338	0.0559932	0	0.112638	14.436	0.657991	0	0	0	0.195509	0	0	0	0.103513
CO	EU+_South	PRT	2002	3.4491	108.413	148.636	0.119688	1.33056	248.7	46.703	2.16905	0	0	5.15451	2.33351	0.00715411	0	2.061
CO	EU+_WestCentral	AUT	2002	2.27759	160.715	277.315	0	0.861894	159.627	25.2548	0	0	0.0587867	3.98151	43.7392	7.18935	0	0.009
CO	EU+_WestCentral	BEL	2002	3.33332	548.511	76.0311	1.05419	1.51577	159.692	35.1432	7.63997	0	1.2406	2.20516	33.3604	0.797485	0	0.053
CO	EU+_WestCentral	CHE	2002	1.05055	16.5258	72.711	0.04924	1.57387	185.631	7.63352	0.0121233	0	0.00154349	3.70812	43.4208	1.30534	0	1.50094
CO	EU+_WestCentral	DEU	2002	99.8753	1108.49	919.213	1.00252	36.2503	1678.03	150.259	0.715949	0	9.68848	18.9298	344.888	22.6861	0	0.73
CO	EU+_WestCentral	FRA	2002	12.3883	1712.34	1641.29	1.28272	5.93371	1709.64	314.237	14.7352	0	0.244805	7.76704	217.497	13.5453	0	1.706
CO	EU+_WestCentral	GBR	2002	64.7226	581.737	462.633	12.6016	2.54233	2282.17	160.963	1.19567	0	0.00671081	50.7315	309.336	26.8374	0	0.175
CO	EU+_WestCentral	IRL	2002	23.3038	9.20733	28.0491	0	0.459615	149.378	14.2265	0.306231	0	0	1.00431	3.79742	0.0209044	0	2.19707
CO	EU+_WestCentral	LUX	2002	0.189178	4.81189	3.16838	0	0.0236443	9.15776	1.11225	0.0261862	0	0.012415	0.493652	2.61366	0	0	0
CO	EU+_WestCentral	NLD	2002	16.0968	149.334	82.4935	0	0.476596	344.664	30.9793	30.1153	0	6.72105	3.46127	77.2461	7.43037	0	0.039
CO	NON_EU	ALB	2002	0.0322	1.02659	44.1016	0.073	0	17.3109	12.6106	0	0	0	0	1.0292	4.89505	0	0.824
CO	NON_EU	BIH	2002	1.70981	18.9523	230.533	0	0	35.9304	19.6762	0	0	0	0	0.0799294	11.1546	0	0.17
CO	NON_EU	BLR	2002	14.6265	10.0965	165.524	1.067	0	341.716	42.5605	2.03347	0	0.0447458	0	85.413	19.5286	0	8.087
CO	NON_EU	KOS	2002	0.715	0.27972	62.7768	0	0	4.04206	9.78038	0	0	0	0	10.3027	5.337	0	0.584
CO	NON_EU	MDA	2002	1.76828	4.27495	56.8121	0.002	0	18.7316	3.55326	0.509673	0	0	0	6.5764	18.6056	0	5.68
CO	NON_EU	MKD	2002	1.58853	2.44289	73.3397	0	0	11.9157	4.87323	0.0998558	0	0	0	0.102846	5.9784	0	0.675
CO	NON_EU	MNE	2002	0.155	42.5968	22.3903	0	0	3.28294	1.65739	0	0	0	0	3.4894	2.314	0	3.74349
CO	NON_EU	RUS	2002	217.449	1034.02	3011.85	68.3683	0	5055.98	262.567	13.8629	0	2.13	0	420.811	170.748	0	453.025
CO	NON_EU	SRB	2002	5.28987	22.9687	300.694	0.605	0	63.2995	12.5021	1.05433	0	0.04461	0	41.4465	13.5711	0	5.252
CO	NON_EU	TUR	2002	14.5489	227.377	1501.02	0.0643498	0	573.502	271.7	0.0939124	0	0	0	269.733	171.357	0	227.141
CO	NON_EU	UKR	2002	51.679	964.662	1010.31	0.335752	0	1280.34	75.7235	0.748132	0	0.39	0	107.353	110.372	0	374.511
CO	EU+_East	BGR	2003	0.950083	15.7283	164.058	0.122746	0	134.513	9.92132	23.7276	0	0.0181112	0.276629	2.9256	0.00700904	0	18.639
CO	EU+_East	CZE	2003	8.81186	151.337	489.41	0.067691	1.2452	328.706	17.9531	6.53216	0	0.00277143	0.133027	28.5344	0.0595208	0	0.143
CO	EU+_East	HUN	2003	14.5035	113.902	244.507	0.126412	1.16432	400.367	24.0085	4.72794	0	0.0682994	0.250708	10.2135	3.05377	0	1.238
CO	EU+_East	POL	2003	37.2087	300.401	1735.28	0.209484	0.0273289	729.829	35.8399	110.501	0	0.0207164	0.527447	114.009	15.2289	0	3.205
CO	EU+_East	ROU	2003	9.91794	124.3	462.711	4.06683	2.42788	312.736	18.1281	3.50798	0	0.166573	0.241973	114.827	8.24454	0	22.056
CO	EU+_East	SVK	2003	2.25501	146.932	167.081	0	0.298755	164.909	10.0075	0.605693	0	0.0239533	0.0744762	17.1866	0.00855134	0	0.076
CO	EU+_East	SVN	2003	1.41027	23.8505	68.503	0.000264902	0.195076	69.8	4.13382	0.00124229	0	0	1.1757	7.71383	0.00186586	0	0.385957
CO	EU+_North	DNK	2003	10.9539	15.6635	97.4981	0.477561	5.04931	220.418	18.1288	0.00948318	0	0	1.44242	57.5617	1.18419	0	0.127
CO	EU+_North	EST	2003	5.76	22.67	95.2866	0.35	0.130121	45.5698	2.9851	0	0	0	0.103197	9.65741	0.026932	0	2.69024
CO	EU+_North	FIN	2003	14.4873	48.8092	148.59	0	0.209611	204.906	22.9488	0.0497048	0	0.0148899	0.988496	89.0661	0	0	0.0746775
CO	EU+_North	ISL	2003	0.00517216	32.7954	0.013587	0	0.0258712	15.5134	0.586287	0	0	0	0.15399	0.55972	0.668652	0	0
CO	EU+_North	LTU	2003	4.17977	5.96304	101.879	0	0.221657	41.2164	7.08968	9.99334	0	0.0102046	0.239543	4.15766	0.00239763	0	0.733
CO	EU+_North	LVA	2003	1.77401	2.81828	135.386	0	15.427	74.9095	6.50581	3.19804	0	0	0.134413	7.13551	0.000343444	0	9.16403
CO	EU+_North	NOR	2003	1.63446	183.327	169.951	0.82717	0.646349	129.374	21.2546	1.04073	0	0	2.10947	113.44	0.0456087	0	0.101
CO	EU+_North	SWE	2003	5.07397	28.9932	135.465	0.0105725	0.331907	252.368	15.9496	0	0	0	1.24894	122.4	0.691112	0	0.108
CO	EU+_South	CYP	2003	0.632456	2.36095	0.484586	0.0136889	0.122588	20.2365	3.5316	0.001271	0	0	0.195036	0.266797	0.0325717	0	0.165
CO	EU+_South	ESP	2003	13.0877	509.371	404.572	0.690433	3.076	646.307	109.582	0.222767	0	0	5.05058	48.4407	0.493668	0	10.634
CO	EU+_South	GRC	2003	25.6138	53.4895	52.1267	0	4.75974	541.758	28.5583	1.06731	0	0	1.1107	37.4197	2.31592e-05	0	6.041
CO	EU+_South	HRV	2003	1.13474	86.9773	197.06	0.31028	1.13289	125.904	7.61947	0.299397	0	0.00381958	1.57882	16.5142	0.000533782	0	0.078
CO	EU+_South	ITA	2003	30.1282	446.707	844.011	0	0	2146.81	159.846	117.265	0	0.00647387	5.53662	102.458	45.8338	0	16.236
CO	EU+_South	MLT	2003	0.43715	0.0440338	0.0560222	0	0.112638	13.6083	0.620264	0	0	0	0.195509	0	0	0	0.103513
CO	EU+_South	PRT	2003	2.7478	119.94	141.774	0.0929665	1.32452	225.155	43.7911	1.95658	0	0	4.88958	1.91027	0.00721416	0	2.061
CO	EU+_WestCentral	AUT	2003	2.47193	175.726	271.052	0	0.833045	158.322	25.9653	0	0	0.0567111	4.26583	43.1576	7.17901	0	0.009
CO	EU+_WestCentral	BEL	2003	3.4985	526.574	79.5011	0.284435	1.59983	153.755	34.9746	7.29617	0	1.22007	2.29742	33.0559	0.825865	0	0.053
CO	EU+_WestCentral	CHE	2003	1.02803	16.8574	73.2922	0.04646	1.64703	178.801	7.28971	0.0114449	0	0.00148899	3.34342	42.7122	1.25284	0	1.50094
CO	EU+_WestCentral	DEU	2003	110.301	1175.14	851.674	0.945672	37.8884	1511.53	138.137	0.636761	0	8.4707	18.1488	333.187	22.4917	0	0.73
CO	EU+_WestCentral	FRA	2003	12.4111	1597.41	1706.7	1.33566	5.1933	1509.75	286.445	12.8803	0	0.229165	7.61974	216.51	13.5983	0	1.706
CO	EU+_WestCentral	GBR	2003	70.1793	517.721	423.097	10.8281	2.58144	2046.03	144.52	1.03895	0	0.00647387	48.1304	308.98	26.05	0	0.175
CO	EU+_WestCentral	IRL	2003	21.7211	11.6153	27.7232	0	0.406676	140.002	13.7394	0.286607	0	0	1.00734	3.67711	0.0291259	0	2.19707
CO	EU+_WestCentral	LUX	2003	0.254711	4.44612	3.16878	0	0.0262606	8.37303	1.03695	0.0236225	0	0.0102287	0.537176	2.4855	0	0	0
CO	EU+_WestCentral	NLD	2003	15.6021	142.746	84.0709	0	0.480191	345.373	29.8311	30.223	0	5.79871	3.47034	77.183	7.32004	0	0.039
CO	NON_EU	ALB	2003	0.0308	0.889059	44.1004	0.073	0	17.9943	13.1084	0	0	0	0	0.9648	4.96137	0	0.824
CO	NON_EU	BIH	2003	1.75888	19.1512	231.369	0	0	32.3293	17.7041	0	0	0	0	0.0819529	11.4121	0	0.17
CO	NON_EU	BLR	2003	14.637	10.2386	166.014	1.067	0	318.219	39.634	1.89365	0	0.0447458	0	77.7547	20.2727	0	8.087
CO	NON_EU	KOS	2003	0.715	0.28148	62.7768	0	0	4.90604	11.8709	0	0	0	0	13.2128	5.337	0	0.584
CO	NON_EU	MDA	2003	1.71452	4.30997	56.8623	0.002	0	20.6958	3.92584	0.563116	0	0	0	5.6366	19.5954	0	5.68
CO	NON_EU	MKD	2003	1.55669	2.57859	73.3402	0	0	10.9668	4.48515	0.0919039	0	0	0	0.104898	6.0156	0	0.675
CO	NON_EU	MNE	2003	0.155	42.5962	22.3903	0	0	3.87296	1.95526	0	0	0	0	4.50727	2.314	0	3.74349
CO	NON_EU	RUS	2003	219.413	1041.68	3005.76	76.5158	0	4838.74	251.285	13.2673	0	2.13	0	446.446	169.895	0	453.025
CO	NON_EU	SRB	2003	5.09925	23.3514	299.563	0.605	0	72.3387	14.2874	1.20488	0	0.04461	0	53.4094	13.602	0	5.252
CO	NON_EU	TUR	2003	14.5582	228.163	1504.56	0.0662332	0	520.755	246.71	0.0852749	0	0	0	266.149	175.172	0	227.141
CO	NON_EU	UKR	2003	50.3753	999.034	1003.12	0.342168	0	1282.55	75.854	0.749421	0	0.39	0	114.14	111.655	0	374.511
CO	EU+_East	BGR	2004	0.910224	16.1906	152.751	0.0680386	0	109.17	9.18246	20.8819	0	0.0216783	0.342594	2.78753	0.0119063	0	18.639
CO	EU+_East	CZE	2004	9.1665	160.068	488.901	0.11078	1.27865	308.307	17.8067	6.14371	0	0.00220966	0.1602	28.2381	0.0653767	0	0.143
CO	EU+_East	HUN	2004	14.9018	106.126	224.495	0.120867	0.721079	363.832	22.4853	4.30462	0	0.0593756	0.287802	9.77595	2.99023	0	1.238
CO	EU+_East	POL	2004	39.3195	311.899	1768.04	0.217416	0.0472276	688.14	38.0261	105.743	0	0.0199582	0.406597	116.154	18.7684	0	3.205
CO	EU+_East	ROU	2004	9.79344	130.103	462.707	3.95865	2.42788	313.238	18.1573	3.51362	0	0.160476	0.241973	109.201	8.21632	0	22.056
CO	EU+_East	SVK	2004	2.18651	152.405	176.523	0	0.373253	151.847	10.4342	0.562017	0	0.0230767	0.0637987	19.2279	0.00867812	0	0.076
CO	EU+_East	SVN	2004	1.6434	24.4609	71.5111	0.000267523	0.189493	58.5591	4.14758	0.00103951	0	0	0.915188	4.44099	0.00181057	0	0.385957
CO	EU+_North	DNK	2004	10.1095	20.2773	100.753	0.541786	4.27644	195.143	17.5052	0.00915568	0	0	1.49276	60.6765	1.0795	0	0.127
CO	EU+_North	EST	2004	8.99	22.51	92.5162	0.26	0.130262	38.5888	2.8717	0	0	0	0.116092	7.60705	0.003965	0	2.69024
CO	EU+_North	FIN	2004	14.0532	54.6537	150.424	0	0.215733	183.287	21.0486	0.0444018	0	0.014345	1.05271	90.9309	0	0	0.0746775
CO	EU+_North	ISL	2004	0.00517895	33.5338	0.0153363	0	0.0278717	14.6942	0.604566	0	0	0	0.17399	0.671802	0.401826	0	0
CO	EU+_North	LTU	2004	4.52262	6.68163	101.909	0	0.221657	40.8439	7.02559	9.90301	0	0.0098311	0.239543	4.14502	0.00239058	0	0.733
CO	EU+_North	LVA	2004	1.68955	3.58869	136.532	0	14.2796	65.0413	5.79906	2.78801	0	0	0.153881	8.04308	0.000363169	0	6.32251
CO	EU+_North	NOR	2004	1.84262	193.578	145.399	0.795709	0.709592	114.949	19.5419	0.91794	0	0	2.18145	114.129	0.0420746	0	0.101
CO	EU+_North	SWE	2004	4.75862	29.0203	127.061	0.00961951	0.319759	222.542	15.0953	0	0	0	1.32747	124.509	0.697782	0	0.108
CO	EU+_South	CYP	2004	0.658854	2.47104	0.490077	0.00393467	0.182232	19.4468	3.25306	0.00112454	0	0	0.201513	0.245655	0.0330027	0	0.165
CO	EU+_South	ESP	2004	13.773	547.37	413.586	0.725535	5.5715	562.442	105.152	0.223758	0	0	5.39867	47.5204	0.482801	0	10.634
CO	EU+_South	GRC	2004	25.8725	53.4948	58.0134	0	4.5793	528.779	28.5576	1.04272	0	0	1.17561	34.2297	2.8426e-05	0	6.041
CO	EU+_South	HRV	2004	1.04212	81.7926	191.712	0.297107	0.829843	113.915	7.52589	0.310121	0	0.00367979	1.48759	16.4417	0.000517868	0	0.078
CO	EU+_South	ITA	2004	29.9499	446.213	553.832	0	0	1878.32	146.401	97.0725	0	0.00623694	5.34141	125.002	56.7654	0	16.236
CO	EU+_South	MLT	2004	0.458575	0.0440338	0.0560513	0	0.112638	12.7806	0.582538	0	0	0	0.195509	0	0	0	0.103513
CO	EU+_South	PRT	2004	2.75935	122.725	135.142	0.0964474	1.34798	204.916	40.3349	1.77845	0	0	4.7986	1.77741	0.00645001	0	2.061
CO	EU+_WestCentral	AUT	2004	2.36893	182.797	264.867	0	0.805975	148.407	25.31	0	0	0.0546356	4.27235	42.1648	7.29613	0	0.009
CO	EU+_WestCentral	BEL	2004	4.44536	506.207	80.561	0.103651	1.64704	135.227	34.9643	6.2943	0	1.19856	2.20092	32.3062	1.23691	0	0.053
CO	EU+_WestCentral	CHE	2004	0.994216	16.711	69.7898	0.05219	1.61788	168.52	6.93999	0.0106892	0	0.0014345	3.1565	42.0205	1.21746	0	1.50094
CO	EU+_WestCentral	DEU	2004	98.9165	1146.2	784.407	0.83958	36.3515	1403.26	129.08	0.579327	0	8.93432	16.5545	323.528	22.2936	0	0.73
CO	EU+_WestCentral	FRA	2004	11.2086	1879.07	1670.1	1.34981	4.50206	1382.5	268.473	11.7093	0	0.231563	7.74834	211.127	13.3884	0	1.706
CO	EU+_WestCentral	GBR	2004	71.2417	507.386	396.547	11.1246	2.48235	1855.61	132.273	0.924254	0	0.00623694	52.8743	326.289	24.7853	0	0.175
CO	EU+_WestCentral	IRL	2004	22.0575	12.6599	27.2117	0	0.34953	134.686	13.7777	0.275866	0	0	1.01701	3.41131	0.0307208	0	2.19707
CO	EU+_WestCentral	LUX	2004	0.302076	7.66699	3.27148	0	0.0250899	7.55845	0.959621	0.0209406	0	0.0115383	0.540812	2.38822	0	0	0
CO	EU+_WestCentral	NLD	2004	8.8566	169.645	85.7417	0	0.447735	335.302	29.1979	29.5734	0	6.16773	3.47039	77.4038	6.93851	0	0.039
CO	NON_EU	ALB	2004	0.0294	0.751529	44.0992	0.073	0	18.6776	13.6062	0	0	0	0	0.9004	5.02768	0	0.824
CO	NON_EU	BIH	2004	1.80794	19.3877	232.206	0	0	28.7281	15.7321	0	0	0	0	0.0839765	11.6695	0	0.17
CO	NON_EU	BLR	2004	14.6475	10.3808	166.503	1.067	0	294.723	36.7075	1.75382	0	0.0447458	0	70.0963	21.0169	0	8.087
CO	NON_EU	KOS	2004	0.715	0.28324	62.7768	0	0	5.77002	13.9615	0	0	0	0	16.1229	5.337	0	0.584
CO	NON_EU	MDA	2004	1.66076	4.34498	56.9125	0.002	0	22.6599	4.29842	0.616558	0	0	0	4.6968	20.5852	0	5.68
CO	NON_EU	MKD	2004	1.52484	2.7143	73.3408	0	0	10.0179	4.09708	0.0839519	0	0	0	0.106949	6.0528	0	0.675
CO	NON_EU	MNE	2004	0.155	42.5956	22.3903	0	0	4.46298	2.25313	0	0	0	0	5.52513	2.314	0	3.74349
CO	NON_EU	RUS	2004	221.377	1049.34	2999.68	84.6634	0	4621.51	240.004	12.6716	0	2.13	0	472.08	169.041	0	453.025
CO	NON_EU	SRB	2004	4.90862	23.7342	298.433	0.605	0	81.3778	16.0727	1.35544	0	0.04461	0	65.3722	13.633	0	5.252
CO	NON_EU	TUR	2004	14.5676	228.949	1508.1	0.0681166	0	468.008	221.721	0.0766375	0	0	0	262.565	178.986	0	227.141
CO	NON_EU	UKR	2004	49.0717	1033.41	995.931	0.348584	0	1284.75	75.9845	0.750711	0	0.39	0	120.927	112.939	0	374.511
CO	EU+_East	BGR	2005	0.925211	16.2985	145.655	0.0773941	0	101.385	9.59776	19.5002	0	0.02265	0.390271	3.03191	0.00921396	0	18.639
CO	EU+_East	CZE	2005	8.86273	133.543	460.885	0.0865771	1.30064	276.467	18.4616	5.58153	0	0.00279	0.152354	28.8601	0.0604059	0	0.143
CO	EU+_East	HUN	2005	11.8278	77.8581	215.892	0.132296	0.852593	336.4	22.3742	4.01311	0	0.0633	0.314207	9.34227	2.97214	0	1.238
CO	EU+_East	POL	2005	32.4017	263.749	1844.59	0.21798	0.0453614	660.102	45.1118	105.01	0	0.0192	0.414485	118.817	16.2139	0	3.205
CO	EU+_East	ROU	2005	9.66895	135.906	462.704	3.85047	2.42788	313.741	18.1864	3.51926	0	0.15438	0.241973	103.575	8.1881	0	22.056
CO	EU+_East	SVK	2005	2.30617	136.945	225.574	0	1.36674	157.64	11.8932	0.587598	0	0.0222	0.0739288	20.3518	0.0120811	0	0.076
CO	EU+_East	SVN	2005	1.26387	25.1511	73.3479	0.00021294	0.19465	53.2094	4.33846	0.000939917	0	0	0.849626	4.24209	0.00190252	0	0.385957
CO	EU+_North	DNK	2005	9.02985	17.0189	110.254	0.417138	4.02907	186.749	17.1671	0.0089724	0	0	1.51203	64.8826	1.13359	0	0.127
CO	EU+_North	EST	2005	9.37	24.15	77.1888	0.17	0.157156	36.5927	2.62606	0	0	0	0.154635	4.84386	0.003926	0	2.69024
CO	EU+_North	FIN	2005	12.814	49.5833	147.423	0	0.221279	164.524	19.3728	0.0398474	0	0.0138	1.11187	88.0928	0	0	0.0746775
CO	EU+_North	ISL	2005	0.00565487	33.6206	0.0146052	0	0.0231774	13.8182	0.570058	0	0	0	0.13953	0.730272	0.159912	0	0
CO	EU+_North	LTU	2005	4.86547	7.40022	101.939	0	0.221657	40.4713	6.96151	9.81268	0	0.00945763	0.239543	4.13238	0.00238353	0	0.733
CO	EU+_North	LVA	2005	1.67529	4.66993	137.193	0	5.45506	53.4694	5.18922	2.32674	0	0	0.194114	9.66439	0.000384053	0	4.57306
CO	EU+_North	NOR	2005	1.99406	204.492	150.424	0.808004	0.36422	104.87	18.6445	0.834358	0	0	2.17203	113.642	0.0456288	0	0.101
CO	EU+_North	SWE	2005	5.1721	28.8004	128.196	0.0120596	0.331902	205.475	14.9065	0	0	0	1.49675	126.25	0.664573	0	0.108
CO	EU+_South	CYP	2005	0.697118	2.42588	0.576574	0	0.158839	18.5888	3.11992	0.00105391	0	0	0.206227	0.245552	0.033498	0	0.165
CO	EU+_South	ESP	2005	15.3691	532.306	416.21	0.729283	5.65234	498.25	97.7154	0.215493	0	0	5.58314	46.8934	0.558725	0	10.634
CO	EU+_South	GRC	2005	26.2677	51.6731	50.8474	0	3.7295	463.419	28.7978	0.894206	0	0	1.13079	53.8665	5.26212e-05	0	6.041
CO	EU+_South	HRV	2005	0.675293	83.2137	203.423	0.297406	0.82616	106.273	6.87701	0.30351	0	0.00354	1.51153	14.7326	0.000542318	0	0.078
CO	EU+_South	ITA	2005	29.6833	493.046	930.419	0	0	1508.07	139.341	81.576	0	0.006	5.21509	132.739	50.4707	0	16.236
CO	EU+_South	MLT	2005	0.48	0.0440338	0.0560804	0	0.112638	11.9529	0.544811	0	0	0	0.195509	0	0	0	0.103513
CO	EU+_South	PRT	2005	3.20352	117.787	128.456	0.125359	1.41636	184.37	37.0003	1.59925	0	0	5.11681	2.3331	0.0134461	0	2.061
CO	EU+_WestCentral	AUT	2005	2.52118	166.157	228.475	0	0.746319	138.241	24.8684	0	0	0.05256	4.53228	42.2358	6.87741	0	0.009
CO	EU+_WestCentral	BEL	2005	4.88114	479.982	83.1978	0.195542	1.60839	113.385	33.4665	5.21351	0	1.17693	2.43489	32.0428	1.14677	0	0.053
CO	EU+_WestCentral	CHE	2005	0.973983	16.0167	68.3497	0.043893	1.50886	158.276	6.92985	0.00997065	0	0.00138	3.19375	41.3983	1.17962	0	1.50094
CO	EU+_WestCentral	DEU	2005	98.6946	1121.07	763.323	0.846904	31.3388	1255.71	120.29	0.512013	0	8.65282	17.8202	322.092	22.0933	0	0.73
CO	EU+_WestCentral	FRA	2005	11.0577	1758.7	1578.13	1.29944	3.63901	1144.57	242.774	9.44231	0	0.23571	7.78175	206.434	13.4993	0	1.706
CO	EU+_WestCentral	GBR	2005	73.1977	517.142	342.364	12.5359	2.40122	1663.16	120.775	0.808168	0	0.006	53.7255	321.525	24.4044	0	0.175
CO	EU+_WestCentral	IRL	2005	22.5648	14.1236	28.4151	0	0.360014	129.979	13.8405	0.265658	0	0	0.953563	3.43075	0.0478312	0	2.19707
CO	EU+_WestCentral	LUX	2005	0.295881	6.21869	3.16297	0	0.022163	6.62219	0.921963	0.0181223	0	0.01026	0.592065	2.22146	0	0	0
CO	EU+_WestCentral	NLD	2005	8.16431	157.064	87.4097	0	0.424915	329.737	28.4215	28.9775	0	5.81405	3.52199	77.0356	7.00351	0	0.039
CO	NON_EU	ALB	2005	0.028	0.614	44.098	0.073	0	19.361	14.104	0	0	0	0	0.836	5.094	0	0.824
CO	NON_EU	BIH	2005	1.857	19.587	233.042	0	0	25.127	13.76	0	0	0	0	0.086	11.927	0	0.17
CO	NON_EU	BLR	2005	14.658	10.523	166.993	1.067	0	271.226	33.781	1.614	0	0.0447458	0	62.438	21.761	0	8.087
CO	NON_EU	KOS	2005	0.715	0.285	62.7768	0	0	6.634	16.052	0	0	0	0	19.033	5.337	0	0.584
CO	NON_EU	MDA	2005	1.607	4.38	56.9627	0.002	0	24.624	4.671	0.67	0	0	0	3.757	21.575	0	5.68
CO	NON_EU	MKD	2005	1.493	2.85	73.3414	0	0	9.069	3.709	0.076	0	0	0	0.109	6.09	0	0.675
CO	NON_EU	MNE	2005	0.155	42.595	22.3903	0	0	5.053	2.551	0	0	0	0	6.543	2.314	0	3.74349
CO	NON_EU	RUS	2005	223.341	1057	2993.6	92.811	0	4404.27	228.722	12.076	0	2.13	0	497.715	168.188	0	453.025
CO	NON_EU	SRB	2005	4.718	24.117	297.302	0.605	0	90.417	17.858	1.506	0	0.04461	0	77.335	13.664	0	5.252
CO	NON_EU	TUR	2005	14.577	229.735	1511.64	0.07	0	415.261	196.732	0.068	0	0	0	258.981	182.8	0	227.141
CO	NON_EU	UKR	2005	47.768	1067.78	988.739	0.355	0	1286.96	76.115	0.752	0	0.39	0	127.714	114.223	0	374.511
CO	EU+_East	BGR	2006	0.956915	17.0063	154.786	0.0853159	0	101.757	8.90777	21.7074	0	0.0233111	0.463162	3.23932	0.0163885	0	18.639
CO	EU+_East	CZE	2006	8.65237	149.773	478.272	0.052384	1.33915	249.699	17.3226	4.96176	0	0.00188755	0.155551	28.5832	0.0531202	0	0.143
CO	EU+_East	HUN	2006	12.2834	48.326	224.545	0.153911	1.15899	260.237	19.5951	3.05467	0	0.0568857	0.292519	9.37891	2.88584	0	1.238
CO	EU+_East	POL	2006	32.5417	268.959	1998.01	0.24054	0.0410111	664.851	50.5864	106.063	0	0.0168197	0.431336	88.6908	15.7206	0	3.205
CO	EU+_East	ROU	2006	10.5446	137.071	435.425	5.95954	2.2395	267.378	18.9942	2.79257	0	0.147998	0.271743	77.8372	7.15357	0	22.056
CO	EU+_East	SVK	2006	2.28349	150.477	218.297	0	0.352091	108.748	10.4691	0.395731	0	0.0220049	0.0876344	18.7424	0.0096799	0	0.076
CO	EU+_East	SVN	2006	1.23473	21.7816	74.9404	0.00021299	0.206994	45.0229	4.2408	0.00921498	0	0	0.81143	5.66284	0.00189462	0	0.385957
CO	EU+_North	DNK	2006	9.30792	13.8891	114.327	0.408459	4.9842	166.767	17.0875	0.0120004	0	0	1.42902	70.1059	1.17456	0	0.127
CO	EU+_North	EST	2006	7.54	16.39	73.8427	0.19	0.148373	35.3659	2.56464	0	0	0	0.145898	5.23789	0.00404	0	2.69024
CO	EU+_North	FIN	2006	15.46	53.8903	150.486	0	0.22218	143.71	18.1232	0.0382142	0	0.0136787	1.24821	89.9891	0	0	0.0746775
CO	EU+_North	ISL	2006	0.0083825	40.1626	0.00955924	0	0.0238934	12.5605	0.761454	0	0	0	0.108665	0.660802	0.153251	0	0
CO	EU+_North	LTU	2006	4.78518	7.8393	107.68	0	0.227412	43.9401	6.69837	11.1958	0	0.00937453	0.242434	3.87662	0.00219643	0	0.733
CO	EU+_North	LVA	2006	1.7859	5.59567	132.211	0	4.45645	45.9529	5.07749	2.00557	0	0	0.225593	10.6109	0.000828271	0	13.4427
CO	EU+_North	NOR	2006	2.14234	197.882	146.199	0.851374	0.480966	91.0485	18.4382	1.26797	0	0	2.34814	115.205	0.0463368	0	0.101
CO	EU+_North	SWE	2006	5.85926	29.6617	115.13	0.0659122	0.314727	183.566	14.8677	0.0169914	0	0	1.75929	132.798	0.660686	0	0.108
CO	EU+_South	CYP	2006	0.719076	2.53943	0.552315	0	0.0993243	17.0766	2.82113	0.000745139	0	0	0.199494	0.245334	0.0341238	0	0.165
CO	EU+_South	ESP	2006	13.8495	509.608	414.616	0.737296	5.1523	416.386	91.178	0.327201	0	0	5.86307	46.475	0.466576	0	10.634
CO	EU+_South	GRC	2006	24.814	50.1448	55.7405	0	3.50907	480.105	29.0832	1.23344	0	0	1.1909	57.8458	6.53457e-05	0	6.041
CO	EU+_South	HRV	2006	1.10312	95.5585	180.721	0.307413	0.809581	87.7753	6.69401	0.407481	0	0.0035089	1.52437	15.2918	0.000563156	0	0.078
CO	EU+_South	ITA	2006	30.6513	492.61	1094.2	0	0	1248.56	116.04	71.4557	0	0.00594728	5.46078	115.068	48.5056	0	16.236
CO	EU+_South	MLT	2006	0.486	0.044074	0.0606884	0	0.0646926	11.0499	0.539668	0	0	0	0.179428	0	0	0	0.103513
CO	EU+_South	PRT	2006	2.69752	117.073	123.183	0.161774	1.39824	161.94	35.3171	1.55751	0	0	5.1549	2.22745	0.0177449	0	2.061
CO	EU+_WestCentral	AUT	2006	3.15287	180.632	225.968	0	0.780495	120.036	22.5851	0.0301948	0	0.0545946	4.83666	42.0297	6.52756	0	0.009
CO	EU+_WestCentral	BEL	2006	4.29739	437.294	87.4594	0.211789	1.44595	98.4754	33.4327	4.44546	0	1.21317	2.64062	32.2149	1.03458	0	0.053
CO	EU+_WestCentral	CHE	2006	0.982097	14.8683	63.1203	0.022252	1.46846	143.887	7.31652	0.0364516	0	0.00136787	3.04679	40.4236	1.2203	0	1.50094
CO	EU+_WestCentral	DEU	2006	101.887	1125.83	791.113	0.83241	31.4498	1127.27	120.946	1.19195	0	8.56061	17.2511	317.894	21.8948	0	0.73
CO	EU+_WestCentral	FRA	2006	9.73922	1599.4	1380.33	1.31113	2.95146	946.71	231.224	8.22145	0	0.236263	7.99226	204.048	13.3762	0	1.706
CO	EU+_WestCentral	GBR	2006	79.4874	549.623	332.34	10.8767	2.35278	1441.03	116.071	1.79905	0	0.00594728	47.7649	329.748	24.4416	0	0.175
CO	EU+_WestCentral	IRL	2006	20.3025	13.0063	27.637	0	0.365986	117.155	13.9272	0.209965	0	0	1.07054	3.17137	0.047538	0	2.19707
CO	EU+_WestCentral	LUX	2006	0.297604	6.99742	3.09147	0	0.0208219	5.88107	0.95616	0.015139	0	0.0113296	0.574296	2.14801	0	0	0
CO	EU+_WestCentral	NLD	2006	5.94675	163.914	89.6801	0	0.44117	333.961	29.0163	28.9438	0	5.77456	3.64679	76.2524	7.49801	0	0.039
CO	NON_EU	ALB	2006	0.0976	0.6668	44.0716	0.0892	0	18.2214	13.7384	0.0022	0	0	0	0.8798	5.5734	0	0.824
CO	NON_EU	BIH	2006	1.8262	19.348	228.198	0	0	26.4474	14.6304	0.0382	0	0	0	0.2348	11.7454	0	0.17
CO	NON_EU	BLR	2006	13.6014	10.5526	165.719	1.0956	0	277.021	39.0912	1.7754	0	0.0447458	0	56.723	21.5548	0	8.087
CO	NON_EU	KOS	2006	0.7286	0.3152	63.2414	0	0	6.8174	15.5314	0.0328	0	0	0	17.894	5.3394	0	0.584
CO	NON_EU	MDA	2006	1.521	4.275	56.7217	0.0028	0	24.6536	5.3018	0.6048	0	0	0	3.3172	23.032	0	5.68
CO	NON_EU	MKD	2006	1.4084	2.8644	73.17	0	0	9.5838	3.8572	0.2568	0	0	0	0.1902	6.054	0	0.675
CO	NON_EU	MNE	2006	0.1656	35.2052	22.4079	0	0	5.46	2.6788	0.0044	0	0	0	6.1502	2.272	0	3.74349
CO	NON_EU	RUS	2006	218.514	1087.14	2975.14	86.321	0	4217.38	238.391	11.1728	0	2.13	0	514.902	169.303	0	453.025
CO	NON_EU	SRB	2006	4.6436	23.6804	290.571	0.5088	0	82.1572	17.6042	2.8462	0	0.04461	0	72.9046	14.4162	0	5.252
CO	NON_EU	TUR	2006	16.43	233.588	1643.14	0.0726	0	353.389	191.504	6.8664	0	0	0	226.617	180.685	0	227.141
CO	NON_EU	UKR	2006	45.078	1057.07	940.873	0.3534	0	1179.68	77.0414	2.397	0	0.39	0	129.245	115.862	0	374.511
CO	EU+_East	BGR	2007	1.11465	16.386	142.868	0.0851574	0	86.03	7.61502	19.2592	0	0.0297183	0.525675	2.82206	0.00702734	0	18.639
CO	EU+_East	CZE	2007	8.76706	176.309	470.347	0.088852	1.35399	231.179	16.513	4.46709	0	0.00156627	0.161945	29.3285	0.0507077	0	0.143
CO	EU+_East	HUN	2007	12.6208	46.5973	215.843	0.118497	1.15615	231.378	17.089	2.57341	0	0.0651939	0.288007	9.11546	2.66664	0	1.238
CO	EU+_East	POL	2007	32.1592	288.795	1790.5	0.241356	0.0554646	626.016	54.5477	103.756	0	0.0159784	0.553299	81.6314	15.5175	0	3.205
CO	EU+_East	ROU	2007	10.0568	127.224	453.123	2.90914	1.73309	227.059	18.537	2.16811	0	0.147352	0.335637	105.388	7.15931	0	22.056
CO	EU+_East	SVK	2007	2.00777	144.667	226.449	0	0.853001	101.7	11.0943	0.364145	0	0.0218099	0.069551	18.8358	0.00925643	0	0.076
CO	EU+_East	SVN	2007	1.67583	20.2443	76.823	0.000159718	0.193414	38.663	4.29238	0.0164921	0	0	0.962284	4.40518	0.00203599	0	0.385957
CO	EU+_North	DNK	2007	8.53674	11.4304	133.19	0.420054	3.41697	150.677	16.6156	0.0148304	0	0	1.48928	75.9096	1.25904	0	0.127
CO	EU+_North	EST	2007	5.04	19.62	91.563	0.22	0.216631	32.5067	2.39118	0	0	0	0.156087	5.51811	0.003551	0	2.69024
CO	EU+_North	FIN	2007	12.8857	53.5801	151.14	0	0.220315	126.798	17.0177	0.0370104	0	0.0135575	1.25943	91.2779	0	0	0.0746775
CO	EU+_North	ISL	2007	0.0117342	55.7285	0.00998268	0	0.0308059	11.1572	0.76656	0	0	0	0.121164	0.664271	0.150196	0	0
CO	EU+_North	LTU	2007	5.00751	7.94926	104.542	0	0.233516	49.6241	8.13606	12.4796	0	0.00929143	0.267379	3.70076	0.000227552	0	0.733
CO	EU+_North	LVA	2007	1.69518	5.48462	129.187	0	4.61255	36.7371	5.04745	1.63384	0	0	0.259927	10.7068	0.000719274	0	5.32701
CO	EU+_North	NOR	2007	2.48893	196.372	141.26	1.69663	0.498718	80.7876	18.7016	1.74351	0	0	2.36595	114.524	0.0437259	0	0.101
CO	EU+_North	SWE	2007	5.71664	30.5895	121.772	0.0662481	0.29127	164.67	15.0695	0.0336072	0	0	1.75406	138.763	0.695333	0	0.108
CO	EU+_South	CYP	2007	0.743113	2.5175	0.648682	0	0.10344	16.3525	2.83553	0.000575769	0	0	0.18708	0.249513	0.0349568	0	0.165
CO	EU+_South	ESP	2007	14.3991	535.579	409.974	0.733759	6.27048	366.678	88.9486	0.467146	0	0	6.30948	44.0588	0.45334	0	10.634
CO	EU+_South	GRC	2007	26.1168	55.489	54.1911	0	1.68769	417	28.4934	1.37277	0	0	1.30153	53.307	8.53347e-05	0	6.041
CO	EU+_South	HRV	2007	1.57914	101.197	168.072	0.337697	0.814702	79.0592	6.5063	0.537317	0	0.00347779	1.53887	15.4607	0.000597712	0	0.078
CO	EU+_South	ITA	2007	31.0151	419.421	1501.86	0	0	997.105	109.675	62.9828	0	0.00589456	5.90134	105.798	48.3466	0	16.236
CO	EU+_South	MLT	2007	0.494	0.0441563	0.0652759	0	0.0507824	10.6606	0.557391	0	0	0	0.19205	0	0	0	0.103513
CO	EU+_South	PRT	2007	2.36747	117.635	118.261	0.163211	1.08957	143.82	33.2826	1.54619	0	0	5.14393	2.23417	0.0204608	0	2.061
CO	EU+_WestCentral	AUT	2007	3.08987	173.464	213.947	0	0.764926	110.374	22.1143	0.0605681	0	0.0764972	4.98413	40.9168	6.16202	0	0.009
CO	EU+_WestCentral	BEL	2007	3.91892	406.063	87.0452	0.291106	1.30431	87.2739	32.6965	3.8845	0	1.21564	2.62384	31.1613	0.999606	0	0.053
CO	EU+_WestCentral	CHE	2007	1.0772	14.2055	53.7644	0.01888	1.51001	138.34	7.87986	0.0608785	0	0.00135575	3.15558	39.3978	1.19036	0	1.50094
CO	EU+_WestCentral	DEU	2007	110.93	1167.25	746.408	0.758502	34.6333	1019.19	115.784	1.9778	0	8.58233	16.6683	305.898	21.6976	0	0.73
CO	EU+_WestCentral	FRA	2007	9.45266	1632.86	1297.93	1.31565	2.51425	853.774	223.539	8.03598	0	0.239447	8.19804	199.782	13.5675	0	1.706
CO	EU+_WestCentral	GBR	2007	79.0887	524.206	337.305	11.4392	2.21128	1257.27	109.659	2.7942	0	0.00589456	36.1245	336.968	24.0631	0	0.175
CO	EU+_WestCentral	IRL	2007	19.9876	13.0694	26.8609	0	0.353753	105.447	14.0476	0.157577	0	0	1.18434	2.94141	0.0432501	0	2.19707
CO	EU+_WestCentral	LUX	2007	0.308158	12.6008	2.7926	0	0.0213443	5.25358	1.00522	0.0125236	0	0.0101681	0.574734	2.14289	0	0	0
CO	EU+_WestCentral	NLD	2007	4.57471	154.369	87.6968	0	0.436303	335.107	29.5816	28.4251	0	6.28827	3.69714	75.4118	7.73641	0	0.039
CO	NON_EU	ALB	2007	0.1672	0.7196	44.0452	0.1054	0	17.0818	13.3728	0.0044	0	0	0	0.9236	6.0528	0	0.824
CO	NON_EU	BIH	2007	1.7954	19.109	223.354	0	0	27.7678	15.5008	0.0764	0	0	0	0.3836	11.5638	0	0.17
CO	NON_EU	BLR	2007	12.5448	10.5822	164.445	1.1242	0	282.816	44.4014	1.9368	0	0.0447458	0	51.008	21.3486	0	8.087
CO	NON_EU	KOS	2007	0.7422	0.3454	63.706	0	0	7.0008	15.0108	0.0656	0	0	0	16.755	5.3418	0	0.584
CO	NON_EU	MDA	2007	1.435	4.17	56.4807	0.0036	0	24.6832	5.9326	0.5396	0	0	0	2.8774	24.489	0	5.68
CO	NON_EU	MKD	2007	1.3238	2.8788	72.9986	0	0	10.0986	4.0054	0.4376	0	0	0	0.2714	6.018	0	0.675
CO	NON_EU	MNE	2007	0.1762	27.8154	22.4255	0	0	5.867	2.8066	0.0088	0	0	0	5.7574	2.23	0	3.74349
CO	NON_EU	RUS	2007	213.687	1117.27	2956.68	79.831	0	4030.48	248.059	10.2696	0	2.13	0	532.089	170.418	0	453.025
CO	NON_EU	SRB	2007	4.5692	23.2438	283.84	0.4126	0	73.8974	17.3504	4.1864	0	0.04461	0	68.4742	15.1684	0	5.252
CO	NON_EU	TUR	2007	18.283	237.441	1774.64	0.0752	0	291.517	186.275	13.6648	0	0	0	194.252	178.57	0	227.141
CO	NON_EU	UKR	2007	42.388	1046.36	893.006	0.3518	0	1072.4	77.9678	4.042	0	0.39	0	130.775	117.5	0	374.511
CO	EU+_East	BGR	2008	1.1443	16.8469	145.429	0.0857535	0	80.6996	7.71472	19.0314	0	0.0841916	0.542552	1.83963	0.00642255	0	18.639
CO	EU+_East	CZE	2008	8.06042	134.103	479.1	0.04666	1.23522	213.298	15.8733	4.02735	0	0.00120731	0.169937	29.5106	0.0443578	0	0.143
CO	EU+_East	HUN	2008	13.5076	32.3351	189.95	0.184836	1.21107	213.742	15.4141	2.21984	0	0.0657207	0.270461	9.04864	2.69965	0	1.238
CO	EU+_East	POL	2008	36.1052	265.739	1838.62	0.249648	0.0666646	608.028	54.1796	102.696	0	0.0158355	0.446317	81.54	19.2613	0	3.205
CO	EU+_East	ROU	2008	9.31194	124.492	580.62	3.00751	1.87777	199.55	19.0111	1.66776	0	0.154801	0.368445	60.4524	7.27359	0	22.056
CO	EU+_East	SVK	2008	2.01395	138.725	201.325	0	0.431625	94.9772	11.8901	0.332491	0	0.0237031	0.0721425	19.7649	0.00759039	0	0.076
CO	EU+_East	SVN	2008	1.62431	14.8813	78.6244	0.000131521	0.212155	37.6896	4.59976	0.0265456	0	0	0.896655	4.50617	0.00211845	0	0.385957
CO	EU+_North	DNK	2008	8.55573	12.0489	122.613	0.334079	2.98761	137.495	15.4239	0.0175744	0	0	1.59836	79.3355	1.16107	0	0.127
CO	EU+_North	EST	2008	4.60185	26.128	91.3682	0.25955	0.0920474	26.8936	2.0888	0	0	0	0.178587	4.51806	0.005952	0	2.69024
CO	EU+_North	FIN	2008	12.5601	46.7444	167.778	0	0.3427	107.937	15.2291	0.0341532	0	0.0134362	1.2573	87.9358	0	0	0.0746775
CO	EU+_North	ISL	2008	0.00771945	94.6267	0.00985172	0	0.0258568	9.88769	0.667601	0	0	0	0.110161	0.635881	0.14847	0	0
CO	EU+_North	LTU	2008	4.58367	5.47743	108.051	0	0.227349	40.9514	8.21729	10.0609	0	0.00920833	0.286945	3.80617	0.000155804	0	0.733
CO	EU+_North	LVA	2008	1.66964	5.69618	125.969	0	4.15979	26.0783	4.28174	1.17074	0	0	0.315287	9.77573	0.000523954	0	4.25342
CO	EU+_North	NOR	2008	2.60724	199.079	137.618	1.54548	0.505878	69.157	18.2478	2.18656	0	0	2.46665	113.43	0.0443382	0	0.101
CO	EU+_North	SWE	2008	5.85127	27.2272	122.759	0.0660857	0.243054	146.249	14.6213	0.0503192	0	0	1.56395	142.568	0.720138	0	0.108
CO	EU+_South	CYP	2008	0.252427	2.47914	0.617576	0	0.100631	15.1802	2.72187	0.000358422	0	0	0.185457	0.215854	0.0358798	0	0.165
CO	EU+_South	ESP	2008	12.0766	517.474	414.297	0.746183	5.79725	297.446	79.2088	0.562283	0	0	5.98475	39.6968	0.513503	0	10.634
CO	EU+_South	GRC	2008	25.7707	50.884	54.1411	0	3.21922	368.455	28.0237	1.42743	0	0	0	58.1464	0.00010031	0	6.041
CO	EU+_South	HRV	2008	1.01987	62.9549	163.207	0.310283	0.856137	69.9233	6.10021	0.662586	0	0.00344669	1.43035	16.4981	0.000588995	0	0.078
CO	EU+_South	ITA	2008	29.9843	426.191	1775.63	0	0	874.727	105.096	58.9555	0	0.00584184	5.49732	84.3762	50.6594	0	16.236
CO	EU+_South	MLT	2008	0.484	0.0442101	0.0699289	0	0.0466065	12.3822	0.573963	0	0	0	0.190316	0	0	0	0.103513
CO	EU+_South	PRT	2008	2.71518	102.342	113.259	0.142461	1.44132	128.21	31.6146	1.57885	0	0	5.17795	2.18586	0.0212391	0	2.061
CO	EU+_WestCentral	AUT	2008	3.60293	162.251	218.995	0	0.741663	97.0226	20.3236	0.0869424	0	0.0688652	5.139	40.2038	5.85105	0	0.009
CO	EU+_WestCentral	BEL	2008	3.05365	412.8	95.9956	0.171441	1.23795	76.7112	30.0494	3.47032	0	1.16999	2.69378	30.9769	0.576735	0	0.053
CO	EU+_WestCentral	CHE	2008	1.27361	14.2372	54.6496	0.025665	1.47204	127.788	8.51568	0.0845225	0	0.00134362	3.23893	38.3812	1.20101	0	1.50094
CO	EU+_WestCentral	DEU	2008	109.621	1121.8	779.513	0.717603	28.3354	920.288	109.394	2.80574	0	8.41948	17.2312	320.763	21.502	0	0.73
CO	EU+_WestCentral	FRA	2008	9.77816	1571.35	1317.6	2.00327	2.00957	709.103	193.367	7.2536	0	0.229265	8.29091	199.281	13.7208	0	1.706
CO	EU+_WestCentral	GBR	2008	76.3869	491.043	377.673	9.65062	2.19896	1125.18	100.876	4.00446	0	0.00584184	32.5786	322.682	23.3524	0	0.175
CO	EU+_WestCentral	IRL	2008	17.7969	11.84	28.3735	0	0.324365	100.539	13.0966	0.114245	0	0	1.2	3.03623	0.055672	0	2.19707
CO	EU+_WestCentral	LUX	2008	0.313586	8.2971	3.036	0	0.0217309	4.7869	1.0629	0.0102843	0	0.0107198	0.570551	2.00258	0	0	0
CO	EU+_WestCentral	NLD	2008	5.00102	157.432	88.2287	0	0.427165	336.404	30.2864	27.902	0	6.19825	3.79152	74.6877	7.56797	0	0.039
CO	NON_EU	ALB	2008	0.2368	0.7724	44.0188	0.1216	0	15.9422	13.0072	0.0066	0	0	0	0.9674	6.5322	0	0.824
CO	NON_EU	BIH	2008	1.7646	18.87	218.511	0	0	29.0882	16.3712	0.1146	0	0	0	0.5324	11.3822	0	0.17
CO	NON_EU	BLR	2008	11.4882	10.6118	163.171	1.1528	0	288.612	49.7116	2.0982	0	0.0447458	0	45.293	21.1424	0	8.087
CO	NON_EU	KOS	2008	0.7558	0.3756	64.1706	0	0	7.1842	14.4902	0.0984	0	0	0	15.616	5.3442	0	0.584
CO	NON_EU	MDA	2008	1.349	4.065	56.2397	0.0044	0	24.7128	6.5634	0.4744	0	0	0	2.4376	25.946	0	5.68
CO	NON_EU	MKD	2008	1.2392	2.8932	72.8272	0	0	10.6134	4.1536	0.6184	0	0	0	0.3526	5.982	0	0.675
CO	NON_EU	MNE	2008	0.1868	20.4256	22.4431	0	0	6.274	2.9344	0.0132	0	0	0	5.3646	2.188	0	3.74349
CO	NON_EU	RUS	2008	208.859	1147.41	2938.22	73.341	0	3843.59	257.728	9.3664	0	2.13	0	549.276	171.533	0	453.025
CO	NON_EU	SRB	2008	4.4948	22.8072	277.11	0.3164	0	65.6376	17.0966	5.5266	0	0.04461	0	64.0438	15.9206	0	5.252
CO	NON_EU	TUR	2008	20.136	241.295	1906.14	0.0778	0	229.646	181.047	20.4632	0	0	0	161.888	176.454	0	227.141
CO	NON_EU	UKR	2008	39.698	1035.66	845.14	0.3502	0	965.12	78.8942	5.687	0	0.39	0	132.306	119.139	0	374.511
CO	EU+_East	BGR	2009	1.00079	11.9261	135.919	0.074964	0	77.6156	7.31117	19.4049	0	0.156933	0.544529	2.00977	0.00335962	0	18.639
CO	EU+_East	CZE	2009	8.26124	120.534	515.144	0.055076	1.22243	210.037	15.487	3.87897	0	0.00141007	0.157549	28.2946	0.048294	0	0.143
CO	EU+_East	HUN	2009	12.9127	22.3971	260.672	0.124826	1.29791	197.754	13.1116	1.89547	0	0.0529994	0.237707	8.49432	2.48152	0	1.238
CO	EU+_East	POL	2009	36.27	211.782	1822.53	0.243648	0.0449811	599.544	58.6883	108.24	0	0.0114437	0.558598	78.4235	20.7195	0	3.205
CO	EU+_East	ROU	2009	7.68555	82.0891	568.449	2.12527	1.68301	179.134	18.6318	1.25319	0	0.207759	0.361388	36.6533	7.37328	0	22.056
CO	EU+_East	SVK	2009	1.86892	108.159	186.066	0	0.304372	86.0027	10.703	0.295529	0	0.0191796	0.0718942	18.7914	0.00578112	0	0.076
CO	EU+_East	SVN	2009	1.79854	8.67646	80.6792	0.00012978	0.216186	32.0178	3.5617	0.0337707	0	0	0.859184	3.92544	0.00225214	0	0.385957
CO	EU+_North	DNK	2009	9.16818	7.09405	112.45	0.212179	3.22992	122.29	13.9773	0.0203159	0	0	1.32062	77.4183	1.15985	0	0.127
CO	EU+_North	EST	2009	5.4	25.2346	93.5131	0.152803	0.1342	24.0356	1.64563	0	0	0	0.128614	5.44467	0.016207	0	2.69024
CO	EU+_North	FIN	2009	11.6831	36.8991	177.672	0	0.213111	93.4951	14.2126	0.0331457	0	0.013315	1.1557	82.1774	0	0	0.0746775
CO	EU+_North	ISL	2009	0.00618338	98.67	0.0187133	0	0.0237983	8.74323	0.687618	0	0	0	0.0856392	0.438146	0.138431	0	0
CO	EU+_North	LTU	2009	4.73078	4.05266	109.539	0	0.149553	36.331	7.36317	8.45746	0	0.00912523	0.19908	2.82979	0.000154519	0	0.733
CO	EU+_North	LVA	2009	1.6184	6.10958	139.013	0	4.89154	21.5155	3.67681	0.933993	0	0	0.334408	9.11385	0.000418996	0	5.48141
CO	EU+_North	NOR	2009	4.13462	161.765	136.987	0.913995	0.505902	59.4032	17.6347	2.69345	0	0	2.39114	112.467	0.0437881	0	0.101
CO	EU+_North	SWE	2009	6.8736	24.6722	124.43	0.0642136	0.249821	130.812	14.1119	0.0687348	0	0	1.40239	143.473	0.751765	0	0.108
CO	EU+_South	CYP	2009	0.468755	2.05256	0.5151	0	0.111874	13.5934	2.50799	0.000168342	0	0	0.161728	0.188618	0.0368793	0	0.165
CO	EU+_South	ESP	2009	10.3424	362.092	483.411	0.673026	6.84418	249.993	72.9832	0.697715	0	0	5.47391	36.1657	0.375485	0	10.634
CO	EU+_South	GRC	2009	24.056	38.4328	52.7652	0	5.21588	344.465	29.0264	1.65043	0	0	1.08338	38.8106	0.000339612	0	6.041
CO	EU+_South	HRV	2009	0.675878	62.4938	164.238	0.324899	0.627819	63.3347	6.17728	0.834571	0	0.00341558	1.42012	15.0211	0.000603582	0	0.078
CO	EU+_South	ITA	2009	25.6633	253.278	1710.02	0	0	746.214	100.806	58.298	0	0.00578912	5.12126	78.2561	47.6647	0	16.236
CO	EU+_South	MLT	2009	0.455	0.0444817	0.0754103	0	0.0426986	9.90873	0.497692	0	0	0	0.179757	0	0.00119642	0	0.103513
CO	EU+_South	PRT	2009	3.88507	93.2539	108.382	0.117595	1.39288	118.668	31.1904	1.70002	0	0	5.11776	1.88622	0.018226	0	2.061
CO	EU+_WestCentral	AUT	2009	3.80187	151.755	221.436	0	0.757409	89.0308	20.0476	0.118571	0	0.057945	5.39586	37.2786	5.44417	0	0.009
CO	EU+_WestCentral	BEL	2009	3.01287	192.357	101.38	0.185124	1.25971	68.1709	28.1554	3.13815	0	0.9395	2.55499	29.4145	0.80039	0	0.053
CO	EU+_WestCentral	CHE	2009	1.31767	13.3774	51.5199	0.014499	1.47072	116.147	8.77461	0.0960583	0	0.0013315	3.09512	37.3773	1.11388	0	1.50094
CO	EU+_WestCentral	DEU	2009	111.524	796.523	752.729	0.653459	24.71	862.59	107.066	4.00907	0	7.24886	16.1501	283.757	21.3053	0	0.73
CO	EU+_WestCentral	FRA	2009	10.8003	1263.56	1299.54	1.97033	1.662	589.358	183.415	6.74797	0	0.221501	7.82537	193.648	13.271	0	1.706
CO	EU+_WestCentral	GBR	2009	66.7046	405.537	366.221	10.7821	2.30878	807.496	89.0998	4.36048	0	0.00578912	25.0175	292.717	22.6737	0	0.175
CO	EU+_WestCentral	IRL	2009	14.7703	9.20938	28.4572	0	0.310559	86.8949	11.8349	0.0603126	0	0	0.994186	2.49071	0.0708295	0	2.19707
CO	EU+_WestCentral	LUX	2009	0.322054	6.75811	3.34902	0	0.0212585	4.28099	1.03967	0.00785171	0	0.00807583	0.535039	1.9419	0	0	0
CO	EU+_WestCentral	NLD	2009	4.21099	120.249	87.3832	0	0.421428	327.779	29.2003	26.5238	0	5.0302	3.70223	73.8218	8.0211	0	0.039
CO	NON_EU	ALB	2009	0.3064	0.8252	43.9924	0.1378	0	14.8026	12.6416	0.0088	0	0	0	1.0112	7.0116	0	0.824
CO	NON_EU	BIH	2009	1.7338	18.631	213.667	0	0	30.4086	17.2416	0.1528	0	0	0	0.6812	11.2006	0	0.17
CO	NON_EU	BLR	2009	10.4316	10.6414	161.897	1.1814	0	294.407	55.0218	2.2596	0	0.0447458	0	39.578	20.9362	0	8.087
CO	NON_EU	KOS	2009	0.7694	0.4058	64.6352	0	0	7.3676	13.9696	0.1312	0	0	0	14.477	5.3466	0	0.584
CO	NON_EU	MDA	2009	1.263	3.96	55.9987	0.0052	0	24.7424	7.1942	0.4092	0	0	0	1.9978	27.403	0	5.68
CO	NON_EU	MKD	2009	1.1546	2.9076	72.6558	0	0	11.1282	4.3018	0.7992	0	0	0	0.4338	5.946	0	0.675
CO	NON_EU	MNE	2009	0.1974	13.0358	22.4607	0	0	6.681	3.0622	0.0176	0	0	0	4.9718	2.146	0	3.74349
CO	NON_EU	RUS	2009	204.032	1177.55	2919.76	66.851	0	3656.7	267.396	8.4632	0	2.13	0	566.463	172.648	0	453.025
CO	NON_EU	SRB	2009	4.4204	22.3706	270.379	0.2202	0	57.3778	16.8428	6.8668	0	0.04461	0	59.6134	16.6728	0	5.252
CO	NON_EU	TUR	2009	21.989	245.148	2037.64	0.0804	0	167.774	175.818	27.2616	0	0	0	129.523	174.339	0	227.141
CO	NON_EU	UKR	2009	37.008	1024.95	797.274	0.3486	0	857.84	79.8206	7.332	0	0.39	0	133.836	120.777	0	374.511
CO	EU+_East	BGR	2010	1.0069	23.7827	156.041	0.0657053	0	68.6681	6.95053	18.3237	0	0.173011	0.436307	1.81584	0.00260963	0	18.639
CO	EU+_East	CZE	2010	9.34713	134.468	549.365	0.021409	1.18611	186.126	14.5176	3.34788	0	0.00182063	0.149157	27.9427	0.059852	0	0.143
CO	EU+_East	HUN	2010	11.5159	24.016	290.577	0.113309	0.984083	171.309	11.5282	1.48689	0	0.0686361	0.224709	8.72249	2.8374	0	1.238
CO	EU+_East	POL	2010	42.3191	236.668	1991.52	0.274116	0.0522298	543.76	58.1119	106.254	0	0.00729769	0.563947	78.5193	17.8871	0	3.205
CO	EU+_East	ROU	2010	7.62727	89.5228	589.304	2.29275	1.05024	147.461	17.5526	0.758421	0	0.250522	0.367555	33.487	7.03781	0	22.056
CO	EU+_East	SVK	2010	1.69325	127.772	214.545	0	0.491507	79.5774	8.23601	0.263112	0	0.0251356	0.0662331	18.779	0.0110197	0	0.076
CO	EU+_East	SVN	2010	2.01812	9.42388	80.7954	0.000336342	0.211121	29.4676	3.44309	0.0449057	0	0	0.882657	3.96647	0.00236747	0	0.385957
CO	EU+_North	DNK	2010	11.5052	4.69327	114.334	0.283476	2.53181	116.673	14.5971	0.0258919	0	0	1.3429	74.7493	1.06241	0	0.127
CO	EU+_North	EST	2010	5.73647	27.7793	94.2956	0.18091	0.072068	21.362	1.70098	0	0	0	0.134025	5.2979	0.018528	0	2.69024
CO	EU+_North	FIN	2010	13.4723	44.6762	194.127	0	0.24465	81.5854	13.7492	0.0326169	0	0.0131937	1.19662	81.838	0	0	0.0746775
CO	EU+_North	ISL	2010	0.00597018	98.7063	0.0112025	0	0.0226808	7.38192	0.685968	0	0	0	0.0913745	0.347192	0.131792	0	0
CO	EU+_North	LTU	2010	5.15057	4.80909	110.184	0	0.136119	20.6152	6.77688	5.00562	0	0.00904213	0.238178	2.78021	0.000711016	0	0.733
CO	EU+_North	LVA	2010	1.95714	7.21004	105.757	0	3.48046	18.6347	4.28202	0.841633	0	0	0.378825	9.01865	0.00043672	0	4.74771
CO	EU+_North	NOR	2010	5.78815	165.546	150.654	1.23683	0.48525	50.5561	17.445	3.30128	0	0	2.46493	112.477	0.0376448	0	0.101
CO	EU+_North	SWE	2010	7.86051	28.1758	121.524	0.060247	0.250777	114.113	14.8091	0.0887261	0	0	1.44021	146.104	0.713667	0	0.108
CO	EU+_South	CYP	2010	0.459637	1.74857	0.4435	0	0.119463	12.7579	2.48411	0	0	0	0.20502	0.195049	0.0378113	0	0.165
CO	EU+_South	ESP	2010	14.0658	456.449	480.719	0.691025	4.23101	227.684	72.5059	0.97951	0	0	5.60451	34.1676	0.490772	0	10.634
CO	EU+_South	GRC	2010	21.0106	41.3884	65.405	0	4.58326	296.819	19.4767	1.60734	0	0	0.959139	35.2483	0.00017329	0	6.041
CO	EU+_South	HRV	2010	0.636881	50.9946	170.711	0.168264	0.732967	54.6983	6.27187	1.00508	0	0.00338448	0.948042	13.1045	0.000614296	0	0.078
CO	EU+_South	ITA	2010	25.743	345.735	1664.89	0	0	662.279	105.98	62.0351	0	0.00573641	5.28335	77.2827	47.1806	0	16.236
CO	EU+_South	MLT	2010	0.45	0.0447533	0.0793225	0	0.0451573	9.27149	0.524604	0	0	0	0.198438	0	0.00298736	0	0.103513
CO	EU+_South	PRT	2010	4.87705	109.127	103.467	0.0860178	1.66398	105.987	30.8012	1.79833	0	0	5.72918	1.81644	0.0166495	0	2.061
CO	EU+_WestCentral	AUT	2010	4.53454	143.764	248.738	0	0.77996	84.4235	21.5821	0.160082	0	0.068081	5.01605	35.9658	5.0878	0	0.009
CO	EU+_WestCentral	BEL	2010	2.79854	262.399	108.433	0.180695	1.36847	60.6458	29.1988	2.87619	0	1.19143	2.33179	28.2658	0.885333	0	0.053
CO	EU+_WestCentral	CHE	2010	1.2601	14.1386	52.4825	0.018184	1.38424	105.043	9.79845	0.111847	0	0.00131937	3.11733	36.3864	1.12926	0	1.50094
CO	EU+_WestCentral	DEU	2010	118.482	1036.68	940.659	0.577967	26.411	790.038	113.025	5.60072	0	8.03804	15.8048	279.014	21.1091	0	0.73
CO	EU+_WestCentral	FRA	2010	12.6893	1626.94	1418.41	1.96489	1.43853	503.368	192.499	6.98797	0	0.23902	7.7343	191.27	12.5753	0	1.706
CO	EU+_WestCentral	GBR	2010	70.5933	365.04	426.107	9.73391	2.24516	675.738	91.1102	5.62517	0	0.00573641	25.3155	311.066	22.1373	0	0.175
CO	EU+_WestCentral	IRL	2010	16.3155	9.56862	27.468	0	0.27792	73.9594	11.0253	0.0100634	0	0	0.979039	2.28994	0.0702432	0	2.19707
CO	EU+_WestCentral	LUX	2010	0.34743	6.41439	3.53211	0	0.0215339	3.84604	1.06092	0.0054584	0	0.0102968	0.531032	1.90093	0	0	0
CO	EU+_WestCentral	NLD	2010	4.4889	128.926	88.6104	0	0.415492	317.621	29.1046	25.0254	0	6.12363	3.66544	72.8714	8.08228	0	0.039
CO	NON_EU	ALB	2010	0.376	0.878	43.966	0.154	0	13.663	12.276	0.011	0	0	0	1.055	7.491	0	0.824
CO	NON_EU	BIH	2010	1.703	18.392	208.823	0	0	31.729	18.112	0.191	0	0	0	0.83	11.019	0	0.17
CO	NON_EU	BLR	2010	9.375	10.671	160.624	1.21	0	300.202	60.332	2.421	0	0.0447458	0	33.863	20.73	0	8.087
CO	NON_EU	KOS	2010	0.783	0.436	65.0998	0	0	7.551	13.449	0.164	0	0	0	13.338	5.349	0	0.584
CO	NON_EU	MDA	2010	1.177	3.855	55.7577	0.006	0	24.772	7.825	0.344	0	0	0	1.558	28.86	0	5.68
CO	NON_EU	MKD	2010	1.07	2.922	72.4844	0	0	11.643	4.45	0.98	0	0	0	0.515	5.91	0	0.675
CO	NON_EU	MNE	2010	0.208	5.646	22.4783	0	0	7.088	3.19	0.022	0	0	0	4.579	2.104	0	3.74349
CO	NON_EU	RUS	2010	199.205	1207.69	2901.3	60.361	0	3469.8	277.065	7.56	0	2.13	0	583.65	173.763	0	453.025
CO	NON_EU	SRB	2010	4.346	21.934	263.648	0.124	0	49.118	16.589	8.207	0	0.04461	0	55.183	17.425	0	5.252
CO	NON_EU	TUR	2010	23.842	249.001	2169.14	0.083	0	105.902	170.59	34.06	0	0	0	97.159	172.224	0	227.141
CO	NON_EU	UKR	2010	34.318	1014.24	749.408	0.347	0	750.56	80.747	8.977	0	0.39	0	135.367	122.416	0	374.511
CO	EU+_East	BGR	2011	1.13896	16.9955	171.185	0.0607598	0	60.1563	6.89865	16.5743	0	0.124507	0.426917	1.90843	0.0502075	0	18.639
CO	EU+_East	CZE	2011	8.42998	137.653	541.662	0.02349	1.17279	162.068	14.3435	2.87231	0	0.0017958	0.135318	28.0458	0.070654	0	0.143
CO	EU+_East	HUN	2011	10.2284	25.1786	335.601	0.114156	1.04486	133.331	11.5447	1.23775	0	0.0532947	0.226169	8.55019	3.19844	0	1.238
CO	EU+_East	POL	2011	45.0786	255.566	1751.58	0.288012	0.0404069	476.443	58.874	94.3833	0	0.00912692	0.683449	79.1828	17.6891	0	3.205
CO	EU+_East	ROU	2011	8.47769	86.7177	527.705	2.20627	1.3755	130.136	17.6295	0.67601	0	0.201604	0.34097	45.2837	7.29834	0	22.056
CO	EU+_East	SVK	2011	1.62074	139.201	201.771	0	0.488761	50.9523	6.18197	0.199631	0	0.0198753	0.0669087	19.2177	0.00762417	0	0.076
CO	EU+_East	SVN	2011	1.80308	10.7489	80.5697	0.00011709	0.214019	26.3276	3.53065	0.0448601	0	0	0.974698	3.73958	0.00240725	0	0.385957
CO	EU+_North	DNK	2011	10.7233	4.85371	99.8548	0.203818	2.22327	94.6927	13.71	0.0206355	0	0	1.23389	71.8867	1.03056	0	0.127
CO	EU+_North	EST	2011	4.74033	23.3777	79.2051	0.17993	0.107778	17.5246	1.75506	0.00177373	0	0	0.165157	4.65164	0.020828	0	2.69024
CO	EU+_North	FIN	2011	13.2606	45.0985	167.598	0	0.265187	70.6988	13.3576	0.03415	0	0.0133237	1.28234	83.7367	0	0	0.0746775
CO	EU+_North	ISL	2011	0.004831	97.288	0.0144203	0	0.0221382	6.57003	0.634753	0	0	0	0.101584	0.297955	0.122443	0	0
CO	EU+_North	LTU	2011	4.53963	5.96571	108.506	0	0.15463	34.3196	7.65714	7.25256	0	0.00913119	0.248412	2.80352	0.00292007	0	0.733
CO	EU+_North	LVA	2011	1.80126	8.80758	109.368	0	3.45172	17.3106	3.69625	0.853432	0	0	0.405053	11.3593	0.00030895	0	4.42059
CO	EU+_North	NOR	2011	5.27322	168.26	130.535	0.897762	0.420858	44.7438	16.7457	2.90893	0	0	2.63068	110.521	0.0361286	0	0.101
CO	EU+_North	SWE	2011	6.24442	28.8025	124.322	0.0663372	0.255013	95.8967	14.5854	0.0878994	0	0	1.69203	148.802	0.804272	0	0.108
CO	EU+_South	CYP	2011	0.571321	1.70474	0.463879	0	0.0974002	11.3267	2.35846	0.0010944	0	0	0.223783	0.188263	0.0388109	0	0.165
CO	EU+_South	ESP	2011	17.875	467.392	471.788	0.70563	7.14478	186.974	66.3574	0.835868	0	0	5.78134	34.4278	0.483387	0	10.634
CO	EU+_South	GRC	2011	21.3541	41.0855	69.528	0	1.45568	268.025	17.2017	1.70082	0	0	0.877734	22.2509	0.000153084	0	6.041
CO	EU+_South	HRV	2011	0.649639	42.1175	160.029	0.213532	0.643857	46.9669	6.38918	0.900159	0	0.00341781	0.946035	12.7665	0.000619075	0	0.078
CO	EU+_South	ITA	2011	24.5332	390.888	1084.9	0	0	587.224	104.858	54.0267	0	0.0057929	4.50645	68.8035	46.7858	0	16.236
CO	EU+_South	MLT	2011	0.0321287	0.0450249	0.0848138	0	0.0634449	8.62085	0.514387	0.0015571	0	0	0.200538	0	0.0032266	0	0.103513
CO	EU+_South	PRT	2011	5.44656	89.6259	108.645	0.164388	1.86715	89.5156	28.8741	1.49026	0	0	5.12442	1.74485	0.00754056	0	2.061
CO	EU+_WestCentral	AUT	2011	4.45264	158.739	214.08	0	0.73436	77.0391	19.6949	0.151812	0	0.0614566	7.04965	35.4603	4.76032	0	0.009
CO	EU+_WestCentral	BEL	2011	2.52176	203.969	77.0738	0.150892	1.15937	51.7895	27.7256	2.16408	0	1.22717	1.67495	28.4294	0.847006	0	0.053
CO	EU+_WestCentral	CHE	2011	1.31988	13.6883	41.0472	0.013356	1.41237	96.2813	9.74163	0.0990621	0	0.00133237	3.3467	35.3863	1.08767	0	1.50094
CO	EU+_WestCentral	DEU	2011	125.522	1063.51	829.767	0.597105	28.6179	761.662	118.647	5.75034	0	7.17213	17.031	287.822	20.9145	0	0.73
CO	EU+_WestCentral	FRA	2011	12.2094	1350.85	1154.72	1.41776	1.15665	407.654	170.761	5.14505	0	0.230743	8.15638	197.465	11.844	0	1.706
CO	EU+_WestCentral	GBR	2011	71.0482	366.804	379.938	9.48558	2.13194	539.442	88.6254	4.76066	0	0.0057929	25.1865	310.659	21.9671	0	0.175
CO	EU+_WestCentral	IRL	2011	16.0199	8.74453	25.1508	0	0.280601	66.3526	11.0709	0.0102954	0	0	0.935643	2.14081	0.076154	0	2.19707
CO	EU+_WestCentral	LUX	2011	0.353159	4.91222	2.75196	0	0.0202872	3.48327	1.15876	0.00443338	0	0.00883418	0.548724	1.86382	0	0	0
CO	EU+_WestCentral	NLD	2011	4.36628	116.246	85.1443	0	0.390318	309.374	30.7364	23.9667	0	6.16972	3.64108	72.2055	7.63655	0	0.039
CO	NON_EU	ALB	2011	0.3704	0.875	43.9478	0.1598	0	12.988	12.7524	0.0182	0	0	0	0.9676	7.46	0	0.824
CO	NON_EU	BIH	2011	1.6716	19.664	206.252	0	0	29.2984	18.228	0.1644	0	0	0	0.7168	10.8208	0	0.17
CO	NON_EU	BLR	2011	10.8434	10.3752	157.328	1.1546	0	260.023	54.1578	2.124	0	0.0447458	0	40.44	20.9602	0	8.087
CO	NON_EU	KOS	2011	0.7886	0.4334	64.6886	0	0	7.0692	13.6	0.1424	0	0	0	12.9328	5.4006	0	0.584
CO	NON_EU	MDA	2011	3.0336	3.8806	55.0421	0.0058	0	23.4304	7.265	0.3102	0	0	0	1.386	28.2534	0	5.68
CO	NON_EU	MKD	2011	1.1172	3.098	72.4484	0	0	10.069	4.3008	0.8378	0	0	0	0.4584	5.9768	0	0.675
CO	NON_EU	MNE	2011	0.198	4.529	22.3403	0	0	6.6566	3.2228	0.0282	0	0	0	4.4396	2.0846	0	3.74349
CO	NON_EU	RUS	2011	186.153	1255.83	2892.96	60.9996	0	3185.59	259.182	10.1154	0	2.13	0	615.141	175.726	0	453.025
CO	NON_EU	SRB	2011	4.5122	22.927	259.692	0.1272	0	46.4346	16.6744	7.5206	0	0.04461	0	53.451	17.2234	0	5.252
CO	NON_EU	TUR	2011	23.6726	256.67	2050.86	0.0856	0	92.7654	171.955	31.183	0	0	0	96.8554	172.222	0	227.141
CO	NON_EU	UKR	2011	32.63	1109.97	750.195	0.331	0	684.252	79.5662	7.3274	0	0.39	0	127.752	123.617	0	374.511
CO	EU+_East	BGR	2012	0.953574	18.3625	171.736	0.0762204	0	55.0253	7.25334	15.7504	0	0.156029	0.55414	1.90953	0.0490216	0	18.639
CO	EU+_East	CZE	2012	8.35751	129.94	559.633	0.013127	1.16012	138.935	13.7389	2.42896	0	0.00164062	0.139567	28.0707	0.075978	0	0.143
CO	EU+_East	HUN	2012	9.26941	24.9911	357.078	0.0965972	1.08661	128.569	12.3084	1.24597	0	0.0579676	0.205854	7.7367	3.08454	0	1.238
CO	EU+_East	POL	2012	43.3395	249.635	1756.76	0.301836	0.0501905	478.186	59.0072	98.1698	0	0.00749868	0.698008	79.7223	18.5909	0	3.205
CO	EU+_East	ROU	2012	8.06157	82.4218	551.568	0.144181	1.3818	130.484	17.7188	0.693231	0	0.223394	0.346225	34.0571	7.60083	0	22.056
CO	EU+_East	SVK	2012	1.75768	135.271	215.388	0	0.502112	48.3336	6.59078	0.223835	0	0.0212548	0.0690156	19.3922	0.00873748	0	0.076
CO	EU+_East	SVN	2012	1.48946	12.3949	77.5154	0.0001008	0.220043	22.875	3.54464	0.0437746	0	0	0.888655	3.8472	0.00251424	0	0.385957
CO	EU+_North	DNK	2012	10.8251	4.59097	93.1255	0.207315	3.72075	85.9904	13.1321	0.017831	0	0	1.22431	68.5991	0.960785	0	0.127
CO	EU+_North	EST	2012	5.12414	32.4102	80.4547	0.150927	0.103829	16.265	1.78005	0.00359793	0	0	0.178256	5.38032	0.01358	0	2.69024
CO	EU+_North	FIN	2012	12.8305	35.0643	181.256	0	0.215663	57.7516	12.2995	0.0331745	0	0.0134536	1.10646	86.5818	0	0	0.0746775
CO	EU+_North	ISL	2012	0.00452353	98.9008	0.00712983	0	0.0232183	5.76823	0.615247	0	0	0	0.107368	0.313243	0.122561	0	0
CO	EU+_North	LTU	2012	5.27112	6.09495	108.151	0	0.152813	29.618	7.58484	6.72919	0	0.00922025	0.260556	2.60883	0.000724329	0	0.733
CO	EU+_North	LVA	2012	1.78854	11.6581	111.064	0	3.11961	17.218	3.46041	0.932213	0	0	0.38231	10.8156	0.000279229	0	4.51494
CO	EU+_North	NOR	2012	6.34244	162.593	133.832	0.910457	0.370938	39.6868	16.3231	2.56528	0	0	2.62885	109.598	0.0370211	0	0.101
CO	EU+_North	SWE	2012	6.33293	31.8994	119.515	0.0626032	0.238755	74.857	13.4359	0.0812803	0	0	1.62352	149.527	0.749079	0	0.108
CO	EU+_South	CYP	2012	0.561414	1.54931	0.639873	0	0.106018	10.0784	2.17023	0.00220826	0	0	0.221704	0.146135	0.0389864	0	0.165
CO	EU+_South	ESP	2012	18.3142	428.03	473.292	0.897999	2.68163	169.24	63.2578	0.710405	0	0	5.17312	32.7594	0.478353	0	10.634
CO	EU+_South	GRC	2012	17.6044	38.0853	73.9644	0	2.6926	239.002	14.3146	1.62782	0	0	0.772712	25.9559	9.48149e-05	0	6.041
CO	EU+_South	HRV	2012	0.635446	44.753	153.279	0.217775	0.614112	35.2749	5.63156	0.713202	0	0.00345115	0.829182	11.7343	0.000644609	0	0.078
CO	EU+_South	ITA	2012	23.2223	326.127	1511.5	0	0	505.004	97.8672	47.8577	0	0.0058494	4.4107	59.0143	47.66	0	16.236
CO	EU+_South	MLT	2012	0.0309	0.0452965	0.0894218	0	0.072832	5.90645	0.534713	0.00233679	0	0	0.1984	0	0.0013985	0	0.103513
CO	EU+_South	PRT	2012	5.46021	92.7308	107.311	0.263684	1.66809	76.9249	27.1283	1.24361	0	0	4.34757	1.67315	0.00744274	0	2.061
CO	EU+_WestCentral	AUT	2012	4.53815	157.094	225.501	0	0.733793	71.7383	19.7118	0.149069	0	0.0640437	4.7947	34.2166	4.46966	0	0.009
CO	EU+_WestCentral	BEL	2012	3.06931	144.975	91.2542	0.148694	1.22417	47.3245	26.3875	1.73444	0	1.39573	1.95616	27.8875	0.786048	0	0.053
CO	EU+_WestCentral	CHE	2012	1.37962	12.8731	42.9144	0.01382	1.49483	88.3946	9.82361	0.089621	0	0.00134536	3.22487	34.4576	1.07966	0	1.50094
CO	EU+_WestCentral	DEU	2012	128.321	1008.45	654.307	0.589652	28.6425	695.525	126.396	5.62226	0	7.69758	15.8536	203.624	20.717	0	0.73
CO	EU+_WestCentral	FRA	2012	11.5495	975.18	1261.65	1.38985	0.998434	353.527	159.387	4.00531	0	0.229794	8.11769	195.283	12.1869	0	1.706
CO	EU+_WestCentral	GBR	2012	84.5661	381.315	420.98	8.36742	2.10101	468.991	89.8149	4.45141	0	0.0058494	22.0338	298.976	21.602	0	0.175
CO	EU+_WestCentral	IRL	2012	18.8839	8.13041	24.8434	0	0.257436	57.9148	10.78	0.0102996	0	0	0.959112	1.97791	0.0747594	0	2.19707
CO	EU+_WestCentral	LUX	2012	0.354898	6.51971	3.34487	0	0.0217574	3.12858	1.19015	0.00345157	0	0.00848163	0.527813	1.79403	0	0	0
CO	EU+_WestCentral	NLD	2012	5.63215	108.839	85.332	0	0.391073	285.755	30.5714	21.6688	0	6.38091	3.45878	71.3367	7.61211	0	0.039
CO	NON_EU	ALB	2012	0.3648	0.872	43.9296	0.1656	0	12.313	13.2288	0.0254	0	0	0	0.8802	7.429	0	0.824
CO	NON_EU	BIH	2012	1.6402	20.936	203.68	0	0	26.8678	18.344	0.1378	0	0	0	0.6036	10.6226	0	0.17
CO	NON_EU	BLR	2012	12.3118	10.0794	154.033	1.0992	0	219.844	47.9836	1.827	0	0.0447458	0	47.017	21.1904	0	8.087
CO	NON_EU	KOS	2012	0.7942	0.4308	64.2774	0	0	6.5874	13.751	0.1208	0	0	0	12.5276	5.4522	0	0.584
CO	NON_EU	MDA	2012	4.8902	3.9062	54.3265	0.0056	0	22.0888	6.705	0.2764	0	0	0	1.214	27.6468	0	5.68
CO	NON_EU	MKD	2012	1.1644	3.258	72.4124	0	0	8.495	4.1516	0.6956	0	0	0	0.4018	6.0436	0	0.675
CO	NON_EU	MNE	2012	0.188	3.412	22.2023	0	0	6.2252	3.2556	0.0344	0	0	0	4.3002	2.0652	0	3.74349
CO	NON_EU	RUS	2012	173.101	1303.97	2884.63	61.6382	0	2901.39	241.3	12.6708	0	2.13	0	646.632	177.689	0	453.025
CO	NON_EU	SRB	2012	4.6784	23.92	255.736	0.1304	0	43.7512	16.7598	6.8342	0	0.04461	0	51.719	17.0218	0	5.252
CO	NON_EU	TUR	2012	23.5032	264.34	1932.58	0.0882	0	79.6288	173.32	28.306	0	0	0	96.5518	172.221	0	227.141
CO	NON_EU	UKR	2012	30.942	1205.7	750.981	0.315	0	617.945	78.3854	5.6778	0	0.39	0	120.137	124.817	0	374.511
CO	EU+_East	BGR	2013	0.776771	17.5063	162.07	0.0681309	0	45.8134	6.44421	13.8957	0	0.158272	0.545473	1.83046	0.0635867	0	18.639
CO	EU+_East	CZE	2013	7.89312	137.143	578.572	0.013846	1.13437	115.271	12.7517	1.99275	0	0.00108978	0.135571	27.9609	0.062695	0	0.143
CO	EU+_East	HUN	2013	9.03858	21.5791	361.952	0.111708	0.824127	117.671	13.6598	1.21751	0	0.0568148	0.194345	8.55793	3.15621	0	1.238
CO	EU+_East	POL	2013	48.3502	251.922	1656.78	0.291624	0.0455649	447.171	57.8335	94.6405	0	0.00525932	0.570012	78.016	20.4265	0	3.205
CO	EU+_East	ROU	2013	7.01215	79.0575	523.04	0.0855709	1.26543	117.963	18.9303	0.644104	0	0.220543	0.32481	37.4784	7.57117	0	22.056
CO	EU+_East	SVK	2013	1.86261	132.494	195.247	0	0.439387	42.3565	6.41187	0.231647	0	0.0218954	0.0672065	19.7418	0.00814438	0	0.076
CO	EU+_East	SVN	2013	1.34569	12.8217	79.5842	0.000151077	0.221223	19.7308	3.39524	0.0426499	0	0	0.753405	3.78573	0.0028193	0	0.385957
CO	EU+_North	DNK	2013	9.98572	4.48511	90.5542	0.213428	3.69145	77.443	12.8188	0.0150674	0	0	1.26024	66.5094	1.01715	0	0.127
CO	EU+_North	EST	2013	6.53899	32.3051	75.434	0.156136	0.105243	13.3976	1.70102	0.00483983	0	0	0.16457	4.40471	0.014011	0	2.69024
CO	EU+_North	FIN	2013	13.4872	37.8398	166.101	0	0.218507	51.3697	11.9778	0.0356293	0	0.0135836	0.99842	85.4796	0	0	0.0746775
CO	EU+_North	ISL	2013	0.00120371	101.297	0.00708665	0	0.0268724	5.30026	0.629908	0	0	0	0.114947	0.297869	0.121603	0	0
CO	EU+_North	LTU	2013	5.65889	5.90282	105.581	0	0.158955	25.5305	7.61537	6.28938	0	0.0093093	0.271616	2.43314	0.000576298	0	0.733
CO	EU+_North	LVA	2013	2.1873	10.8295	97.8809	0	3.09849	15.2963	3.45943	0.927196	0	0	0.37549	11.6055	0.000302119	0	4.52013
CO	EU+_North	NOR	2013	6.62683	167.378	104.563	0.865041	0.34742	34.9725	15.9162	2.24836	0	0	2.57511	108.363	0.0340563	0	0.101
CO	EU+_North	SWE	2013	6.39004	31.5236	121.332	0.0559737	0.231014	67.7684	13.4211	0.0878243	0	0	1.69184	149.294	0.748935	0	0.108
CO	EU+_South	CYP	2013	0.427919	2.22203	0.542455	0.029543	0.0830695	8.85111	1.97857	0.00329961	0	0	0.19621	0.123954	0.0386308	0	0.165
CO	EU+_South	ESP	2013	23.4615	447.729	470.509	1.25766	4.42838	138.729	57.1729	0.55798	0	0	4.6501	29.2753	0.547755	0	10.634
CO	EU+_South	GRC	2013	15.6159	36.3187	60.1253	0	0.992634	220.628	18.463	1.66714	0	0	0.770661	29.6608	0.000104447	0	6.041
CO	EU+_South	HRV	2013	0.600728	39.1476	145.961	0.20703	0.539252	32.2848	6.89772	0.70084	0	0.00348448	0.840712	11.3101	0.00065326	0	0.078
CO	EU+_South	ITA	2013	19.7199	207.25	1514.58	0	0	460.383	93.5493	45.5352	0	0.0059059	4.17929	65.214	44.8613	0	16.236
CO	EU+_South	MLT	2013	0.516	0.0455683	0.0877398	0	0.0458628	5.46247	0.599559	0.00362392	0	0	0.218368	0	0.00134161	0	0.103513
CO	EU+_South	PRT	2013	5.06658	77.9933	108.771	0.393945	1.60614	70.0547	27.3273	1.09071	0	0	4.00217	1.70937	0.00648707	0	2.061
CO	EU+_WestCentral	AUT	2013	4.23903	162.22	266.265	0	0.736032	66.6287	21.1967	0.14786	0	0.0694433	4.91072	33.1093	4.15952	0	0.009
CO	EU+_WestCentral	BEL	2013	2.98024	312.924	105.014	0.185249	1.32522	41.6202	25.5622	1.24513	0	1.40177	2.06489	27.6821	0.359953	0	0.053
CO	EU+_WestCentral	CHE	2013	1.31499	12.9093	44.2659	0.00987	1.49169	80.7016	9.77262	0.0779973	0	0.00135836	3.09425	33.5076	1.05877	0	1.50094
CO	EU+_WestCentral	DEU	2013	130.956	1022.6	638.375	0.548654	26.9596	667.239	134.132	5.83607	0	7.98214	14.5283	197.712	20.521	0	0.73
CO	EU+_WestCentral	FRA	2013	12.7009	1015.58	1341.2	1.30861	0.905203	313.75	154.524	3.0286	0	0.239725	7.97581	199.423	12.5534	0	1.706
CO	EU+_WestCentral	GBR	2013	81.3411	437.22	458.796	8.8996	1.88573	387.652	87.5927	3.9843	0	0.0059059	20.8884	293.194	21.2691	0	0.175
CO	EU+_WestCentral	IRL	2013	16.0946	7.84282	26.4235	0	0.224383	52.2514	11.3408	0.0107027	0	0	0.969572	1.7186	0.0757959	0	2.19707
CO	EU+_WestCentral	LUX	2013	0.404808	7.05452	3.6779	0	0.020501	2.81944	1.18924	0.00253948	0	0.00924274	0.528769	1.76238	0	0	0
CO	EU+_WestCentral	NLD	2013	5.6589	94.5812	86.2571	0	0.354346	271.439	30.9036	20.2138	0	6.59244	3.34712	70.6019	7.54527	0	0.039
CO	NON_EU	ALB	2013	0.3592	0.869	43.9114	0.1714	0	11.638	13.7052	0.0326	0	0	0	0.7928	7.398	0	0.824
CO	NON_EU	BIH	2013	1.6088	22.208	201.109	0	0	24.4372	18.46	0.1112	0	0	0	0.4904	10.4244	0	0.17
CO	NON_EU	BLR	2013	13.7802	9.7836	150.737	1.0438	0	179.665	41.8094	1.53	0	0.0447458	0	53.594	21.4206	0	8.087
CO	NON_EU	KOS	2013	0.7998	0.4282	63.8662	0	0	6.1056	13.902	0.0992	0	0	0	12.1224	5.5038	0	0.584
CO	NON_EU	MDA	2013	6.7468	3.9318	53.6109	0.0054	0	20.7472	6.145	0.2426	0	0	0	1.042	27.0402	0	5.68
CO	NON_EU	MKD	2013	1.2116	3.418	72.3764	0	0	6.921	4.0024	0.5534	0	0	0	0.3452	6.1104	0	0.675
CO	NON_EU	MNE	2013	0.178	2.295	22.0643	0	0	5.7938	3.2884	0.0406	0	0	0	4.1608	2.0458	0	3.74349
CO	NON_EU	RUS	2013	160.049	1352.12	2876.29	62.2768	0	2617.18	223.417	15.2262	0	2.13	0	678.123	179.651	0	453.025
CO	NON_EU	SRB	2013	4.8446	24.913	251.781	0.1336	0	41.0678	16.8452	6.1478	0	0.04461	0	49.987	16.8202	0	5.252
CO	NON_EU	TUR	2013	23.3338	272.009	1814.3	0.0908	0	66.4922	174.686	25.429	0	0	0	96.2482	172.219	0	227.141
CO	NON_EU	UKR	2013	29.254	1301.44	751.768	0.299	0	551.637	77.2046	4.0282	0	0.39	0	112.523	126.018	0	374.511
CO	EU+_East	BGR	2014	0.861369	18.935	148.29	0.0718446	0	48.3878	7.73618	15.6049	0	0.150866	0.549565	1.71877	0.035498	0	18.639
CO	EU+_East	CZE	2014	7.90566	142.684	556.626	0.006806	1.16278	92.5104	12.3068	1.55502	0	0.00118822	0.139168	28.039	0.065876	0	0.143
CO	EU+_East	HUN	2014	8.06932	21.7464	292.237	0.0653536	0.840348	108.244	15.883	1.19653	0	0.0539895	0.201205	8.74676	3.04093	0	1.238
CO	EU+_East	POL	2014	45.9852	261.888	1465.91	0.290352	0.0704439	368.785	61.7831	81.4939	0	0.00641824	0.702215	75.2895	22.2802	0	3.205
CO	EU+_East	ROU	2014	6.90152	77.7809	532.148	0.121954	1.11332	115.269	20.8877	0.657217	0	0.213886	0.360101	32.5225	7.59866	0	22.056
CO	EU+_East	SVK	2014	1.68618	148.907	140.731	0	0.466155	35.3288	6.61732	0.228506	0	0.0198856	0.0625109	24.5694	0.00791627	0	0.076
CO	EU+_East	SVN	2014	1.17353	12.8642	63.0164	0.000135887	0.225967	16.2865	3.09315	0.0398594	0	0	0.810092	4.2355	0.00282276	0	0.385957
CO	EU+_North	DNK	2014	9.84519	4.24861	80.4961	0.23314	3.05274	67.6019	12.6903	0.0119541	0	0	1.08074	64.5539	0.966301	0	0.127
CO	EU+_North	EST	2014	6.50762	31.5927	71.7563	0.16922	0.109606	11.2503	1.65145	0.00602281	0	0	0.169182	5.51706	0.014236	0	2.69024
CO	EU+_North	FIN	2014	13.0184	37.2021	168.462	0	0.195525	46.1444	12.0386	0.0394106	0	0.0137135	1.03376	82.9985	0	0	0.0746775
CO	EU+_North	ISL	2014	0.000536567	101.073	0.0134151	0	0.0194996	4.57381	0.538697	0	0	0	0.135186	0.435884	0.13921	0	0
CO	EU+_North	LTU	2014	6.19518	5.78907	98.307	0	0.165701	23.3978	8.27648	6.22229	0	0.00939836	0.297312	2.65711	0.000194192	0	0.733
CO	EU+_North	LVA	2014	2.21311	11.5359	92.5065	0	3.50792	14.1377	3.43575	0.937849	0	0	0.365934	10.0847	0.000398814	0	6.36047
CO	EU+_North	NOR	2014	6.92033	167.162	90.5811	0.867842	0.372204	30.6676	15.5467	1.95894	0	0	2.73989	107.154	0.0334403	0	0.101
CO	EU+_North	SWE	2014	5.40793	32.5816	114.008	0.0628172	0.235185	62.7318	13.4454	0.100653	0	0	1.66968	147.706	0.729009	0	0.108
CO	EU+_South	CYP	2014	0.584705	2.81179	0.463181	0	0.0331429	8.1435	2.03571	0.00469914	0	0	0.202686	0.116538	0.0381355	0	0.165
CO	EU+_South	ESP	2014	23.4706	472.395	469.589	1.55947	4.42541	127.728	56.6826	0.452736	0	0	4.57018	28.898	0.676287	0	10.634
CO	EU+_South	GRC	2014	15.6571	38.3111	52.5193	0	1.06588	241.86	18.7285	2.19848	0	0	0.824283	16.2192	0.000121749	0	6.041
CO	EU+_South	HRV	2014	0.379479	34.4963	121.839	0.237345	0.46898	27.3526	6.82413	0.623568	0	0.00351782	0.852359	11.5791	0.000682124	0	0.078
CO	EU+_South	ITA	2014	17.6675	209.615	1308.5	0	0	427.292	94.758	44.0178	0	0.0059624	4.95135	71.163	42.026	0	16.236
CO	EU+_South	MLT	2014	0.379	0.0477703	0.101025	0	0.0437784	5.12313	0.689652	0.00515012	0	0	0.228428	0	0.00057465	0	0.103513
CO	EU+_South	PRT	2014	5.47445	66.3179	107.338	0.216607	1.72602	64.941	28.745	0.965985	0	0	4.32782	1.74073	0.00624072	0	2.061
CO	EU+_WestCentral	AUT	2014	3.85643	171.566	219.954	0	0.724451	62.4728	19.4296	0.151085	0	0.0648637	4.63751	32.9016	3.85429	0	0.009
CO	EU+_WestCentral	BEL	2014	2.67765	152.168	70.9363	0.14564	1.30528	38.1838	24.5644	0.830506	0	1.42692	2.09196	27.727	0.174786	0	0.053
CO	EU+_WestCentral	CHE	2014	0.916863	12.5922	34.3243	0.014925	1.22733	73.8195	9.67062	0.0648142	0	0.00137135	3.08917	32.5899	1.02385	0	1.50094
CO	EU+_WestCentral	DEU	2014	130.131	1048.13	521.469	0.532607	27.5717	645.802	136.984	6.18976	0	7.92744	14.1363	206.439	20.3285	0	0.73
CO	EU+_WestCentral	FRA	2014	10.7837	845.217	1059.51	1.26551	0.775025	265.779	143.159	1.95883	0	0.231182	7.91898	199.527	12.7009	0	1.706
CO	EU+_WestCentral	GBR	2014	69.1592	461.813	411.842	9.31717	1.80911	315.073	83.1588	3.51508	0	0.0059624	23.3706	311.804	20.6929	0	0.175
CO	EU+_WestCentral	IRL	2014	15.5789	9.58054	22.9164	0	0.213422	47.178	12.2177	0.0111956	0	0	0.983033	1.50877	0.0645581	0	2.19707
CO	EU+_WestCentral	LUX	2014	0.515402	6.42354	3.93899	0	0.0207816	2.67371	1.23956	0.00179423	0	0.00849642	0.547033	1.78471	0	0	0
CO	EU+_WestCentral	NLD	2014	4.38148	94.4609	83.9812	0	0.38757	253.837	30.3979	18.3625	0	6.74937	3.39749	70.0964	7.88533	0	0.039
CO	NON_EU	ALB	2014	0.3536	0.866	43.8932	0.1772	0	10.963	14.1816	0.0398	0	0	0	0.7054	7.367	0	0.824
CO	NON_EU	BIH	2014	1.5774	23.48	198.537	0	0	22.0066	18.576	0.0846	0	0	0	0.3772	10.2262	0	0.17
CO	NON_EU	BLR	2014	15.2486	9.4878	147.442	0.9884	0	139.486	35.6352	1.233	0	0.0447458	0	60.171	21.6508	0	8.087
CO	NON_EU	KOS	2014	0.8054	0.4256	63.455	0	0	5.6238	14.053	0.0776	0	0	0	11.7172	5.5554	0	0.584
CO	NON_EU	MDA	2014	8.6034	3.9574	52.8953	0.0052	0	19.4056	5.585	0.2088	0	0	0	0.87	26.4336	0	5.68
CO	NON_EU	MKD	2014	1.2588	3.578	72.3404	0	0	5.347	3.8532	0.4112	0	0	0	0.2886	6.1772	0	0.675
CO	NON_EU	MNE	2014	0.168	1.178	21.9263	0	0	5.3624	3.3212	0.0468	0	0	0	4.0214	2.0264	0	3.74349
CO	NON_EU	RUS	2014	146.997	1400.26	2867.95	62.9154	0	2332.97	205.535	17.7816	0	2.13	0	709.614	181.614	0	453.025
CO	NON_EU	SRB	2014	5.0108	25.906	247.825	0.1368	0	38.3844	16.9306	5.4614	0	0.04461	0	48.255	16.6186	0	5.252
CO	NON_EU	TUR	2014	23.1644	279.679	1696.03	0.0934	0	53.3556	176.051	22.552	0	0	0	95.9446	172.218	0	227.141
CO	NON_EU	UKR	2014	27.566	1397.17	752.555	0.283	0	485.33	76.0238	2.3786	0	0.39	0	104.908	127.218	0	374.511
CO	EU+_East	BGR	2015	0.745426	18.5672	145.79	0.0794721	0	44.7227	10.9353	16.2109	0	0.167934	0.564586	1.85124	0.176841	0	18.639
CO	EU+_East	CZE	2015	8.47054	138.749	557.91	0.004854	1.20579	77.6102	12.0304	1.24827	0	0.00146603	0.152607	27.9273	0.058187	0	0.143
CO	EU+_East	HUN	2015	7.76567	24.9712	308.699	0.113042	0.877668	72.4663	17.45	0.807829	0	0.0548924	0.218795	8.76965	2.9404	0	1.238
CO	EU+_East	POL	2015	47.1398	259.101	1455.99	0.31368	0.055724	321.968	81.1062	78.8796	0	0.00518325	0.588849	74.8098	20.0439	0	3.205
CO	EU+_East	ROU	2015	7.45964	83.9315	508.114	0.0616999	1.21568	99.1466	27.5393	0.62234	0	0.241764	0.397324	37.6681	7.62784	0	22.056
CO	EU+_East	SVK	2015	1.67418	146.071	160.783	0	0.473973	31.1763	7.00575	0.239597	0	0.0164363	0.0735509	22.6536	0.00920903	0	0.076
CO	EU+_East	SVN	2015	0.997623	12.8012	69.8743	0.0001512	0.211094	15.4018	3.18824	0.043643	0	0	0.782494	4.1674	0.00313975	0	0.385957
CO	EU+_North	DNK	2015	10.954	5.0713	88.2846	0.209999	4.05157	63.52	12.5961	0.00950685	0	0	1.12687	62.3148	1.02406	0	0.127
CO	EU+_North	EST	2015	5.45233	36.5099	68.3004	0.170682	0.108236	10.8662	1.85886	0.00808792	0	0	0.174126	5.22346	0.012435	0	2.69024
CO	EU+_North	FIN	2015	13.2039	29.6141	161.012	0	0.202859	40.5532	12.1734	0.043276	0	0.0138435	0.974322	80.8723	0	0	0.0746775
CO	EU+_North	ISL	2015	0.000784355	103.27	0.0061912	0	0.019537	4.76929	0.606541	0	0	0	0.155379	0.323554	0.127775	0	0
CO	EU+_North	LTU	2015	7.47028	5.90375	91.4639	0	0.179417	21.8389	8.8418	6.26838	0	0.00948742	0.312603	2.37054	0.000465241	0	0.733
CO	EU+_North	LVA	2015	2.39063	10.9008	74.4219	0	3.60045	12.7378	3.36613	0.913168	0	0	0.37842	8.98116	0.000338815	0	5.03185
CO	EU+_North	NOR	2015	7.88202	172.776	93.8419	0.670308	0.368482	27.1042	15.4039	1.73591	0	0	2.58061	106.437	0.030697	0	0.101
CO	EU+_North	SWE	2015	5.32583	31.0423	109.166	0.0743291	0.222433	58.1527	13.4751	0.119098	0	0	1.46508	146.206	0.692049	0	0.108
CO	EU+_South	CYP	2015	0.443983	2.51819	0.63534	0	0.0759777	7.38399	2.40593	0.00646702	0	0	0.187831	0.119485	0.038194	0	0.165
CO	EU+_South	ESP	2015	23.1251	474.947	464.072	0.895568	3.92392	116.933	57.9381	0.34942	0	0	4.83184	29.298	0.547682	0	10.634
CO	EU+_South	GRC	2015	17.2891	39.5988	60.7836	0	1.50939	209.015	19.2979	2.33252	0	0	0.929951	17.0652	0.000139051	0	6.041
CO	EU+_South	HRV	2015	0.58483	36.1916	135.046	0.262558	0.456601	25.3164	7.92679	0.64192	0	0.00355115	0.761757	11.1808	0.00076206	0	0.078
CO	EU+_South	ITA	2015	19.8358	175.628	1415.77	0	0	394.709	95.5086	45.1947	0	0.0060189	4.94103	66.8476	47.0541	0	16.236
CO	EU+_South	MLT	2015	0.044	0.0509745	0.109798	0	0.00218484	5.02701	0.811241	0.00732278	0	0	0.237459	0	0.0007223	0	0.103513
CO	EU+_South	PRT	2015	5.63717	77.4445	105.769	0.262102	1.7034	60.8173	30.6912	0.840733	0	0	4.43354	1.76488	0.00529508	0	2.061
CO	EU+_WestCentral	AUT	2015	4.11581	179.463	233.285	0	0.71039	59.9701	18.8467	0.162998	0	0.0543197	5.10392	32.0224	3.60645	0	0.009
CO	EU+_WestCentral	BEL	2015	2.53231	192.733	83.3129	0.176087	1.33917	38.1465	24.489	0.478178	0	1.437	2.06588	27.9509	0.185747	0	0.053
CO	EU+_WestCentral	CHE	2015	0.810798	11.8399	36.2731	0.008508	1.26171	65.2604	9.20428	0.0501984	0	0.00138435	3.08234	31.6427	1.02366	0	1.50094
CO	EU+_WestCentral	DEU	2015	131.989	1054.31	546.129	0.54103	28.5494	589.764	141.613	6.30772	0	7.49093	15.4504	329.888	20.1367	0	0.73
CO	EU+_WestCentral	FRA	2015	14.4751	806.224	1105.51	1.08403	0.688338	228.351	140.182	0.97839	0	0.225858	8.10249	199.099	12.8744	0	1.706
CO	EU+_WestCentral	GBR	2015	63.0759	434.499	433.072	9.56046	1.71677	274.304	82.1022	3.40568	0	0.0060189	18.1785	329.455	20.6727	0	0.175
CO	EU+_WestCentral	IRL	2015	17.8619	9.5088	22.5465	0	0.230178	42.0408	12.6531	0.0116757	0	0	1.11723	1.43931	0.0690904	0	2.19707
CO	EU+_WestCentral	LUX	2015	0.537179	4.78881	3.28333	0	0.021525	2.45393	1.2186	0.000938195	0	0.00707221	0.590792	1.71875	0	0	0
CO	EU+_WestCentral	NLD	2015	4.12189	100.447	85.2478	0	0.338664	248.535	32.1458	17.4964	0	6.70393	3.35877	69.4273	7.94399	0	0.039
CO	NON_EU	ALB	2015	0.348	0.863	43.875	0.183	0	10.288	14.658	0.047	0	0	0	0.618	7.336	0	0.824
CO	NON_EU	BIH	2015	1.546	24.752	195.966	0	0	19.576	18.692	0.058	0	0	0	0.264	10.028	0	0.17
CO	NON_EU	BLR	2015	16.717	9.192	144.147	0.933	0	99.307	29.461	0.936	0	0.0447458	0	66.748	21.881	0	8.087
CO	NON_EU	KOS	2015	0.811	0.423	63.0438	0	0	5.142	14.204	0.056	0	0	0	11.312	5.607	0	0.584
CO	NON_EU	MDA	2015	10.46	3.983	52.1797	0.005	0	18.064	5.025	0.175	0	0	0	0.698	25.827	0	5.68
CO	NON_EU	MKD	2015	1.306	3.738	72.3044	0	0	3.773	3.704	0.269	0	0	0	0.232	6.244	0	0.675
CO	NON_EU	MNE	2015	0.158	0.061	21.7883	0	0	4.931	3.354	0.053	0	0	0	3.882	2.007	0	3.74349
CO	NON_EU	RUS	2015	133.945	1448.4	2859.61	63.554	0	2048.76	187.652	20.337	0	2.13	0	741.105	183.577	0	453.025
CO	NON_EU	SRB	2015	5.177	26.899	243.869	0.14	0	35.701	17.016	4.775	0	0.04461	0	46.523	16.417	0	5.252
CO	NON_EU	TUR	2015	22.995	287.348	1577.75	0.096	0	40.219	177.416	19.675	0	0	0	95.641	172.216	0	227.141
CO	NON_EU	UKR	2015	25.878	1492.9	753.342	0.267	0	419.022	74.843	0.729	0	0.39	0	97.293	128.419	0	374.511
CO	EU+_East	BGR	2016	0.639805	19.0453	156.095	0.0817547	0	40.8769	10.3004	15.0026	0	0.159583	0.628287	1.71522	0.150119	0	18.639
CO	EU+_East	CZE	2016	9.93708	149.688	549.422	0.000634	1.19393	69.7452	10.6728	1.09836	0	0.00155253	0.161399	27.7234	0.061819	0	0.143
CO	EU+_East	HUN	2016	7.64504	21.7351	306.175	0.0674723	0.835668	70.9243	16.4295	0.743108	0	0.057698	0.238749	8.91714	2.90957	0	1.238
CO	EU+_East	POL	2016	48.9402	256.516	1529.41	0.30948	0.0498573	341.908	92.2691	84.9534	0	0.00617518	0.593362	79.1794	20.8857	0	3.205
CO	EU+_East	ROU	2016	7.35387	84.3136	507.926	0.0462909	1.48445	99.7822	29.7836	0.679499	0	0.234425	0.46633	39.4616	7.6624	0	22.056
CO	EU+_East	SVK	2016	2.17154	146.971	169.954	0	0.472697	27.1469	7.17958	0.237345	0	0.0194437	0.0787842	22.5186	0.0075452	0	0.076
CO	EU+_East	SVN	2016	1.13194	12.581	72.4194	0.000242525	0.193947	15.2986	3.53307	0.0555574	0	0	0.775007	4.04431	0.00296303	0	0.385957
CO	EU+_North	DNK	2016	11.8759	5.19022	87.0261	0.232916	2.09504	57.839	11.398	0.0124301	0	0	1.15955	61.1464	1.10159	0	0.127
CO	EU+_North	EST	2016	6.50642	41.3592	70.4761	0.13695	0.110664	10.968	1.8548	0.0111785	0	0	0.178877	8.19921	0.012023	0	2.69024
CO	EU+_North	FIN	2016	13.124	30.3066	175.889	0	0.213859	35.7478	11.5256	0.046003	0	0.0134385	0.984362	78.4392	0	0	0.0746775
CO	EU+_North	ISL	2016	0.000481099	102.149	0.00475795	0	0.0182033	4.03521	0.750411	0	0	0	0.216983	0.368546	0.134235	0	0
CO	EU+_North	LTU	2016	7.41382	5.55844	91.4849	0	0.17167	21.1097	8.89875	6.01697	0	0.0092099	0.332396	2.00005	0.000110933	0	0.733
CO	EU+_North	LVA	2016	2.73542	9.14429	74.4559	0	3.68144	11.5304	3.26581	0.850127	0	0	0.377612	9.81324	0.000409198	0	4.07044
CO	EU+_North	NOR	2016	8.49798	175.471	89.9064	0.718663	0.336014	25.1705	14.343	1.68288	0	0	2.50738	106.821	0.0381096	0	0.101
CO	EU+_North	SWE	2016	5.87731	32.2426	114.572	0.055248	0.220231	53.2986	12.4736	0.130279	0	0	1.61785	144.611	0.738415	0	0.108
CO	EU+_South	CYP	2016	0.44783	2.53449	0.789245	0	0.0623948	7.47804	2.5664	0.00792958	0	0	0.234102	0.112416	0.0384867	0	0.165
CO	EU+_South	ESP	2016	23.1217	461.853	466.617	0.868526	3.4081	123.578	56.6611	0.374925	0	0	5.2491	29.4423	0.644352	0	10.634
CO	EU+_South	GRC	2016	14.0219	38.9353	54.9849	0	1.44728	175.777	20.3265	1.83975	0	0	1.0414	15.1257	0.000106483	0	6.041
CO	EU+_South	HRV	2016	0.741592	34.6622	124.132	0.295987	0.458864	24.1002	7.65359	0.617364	0	0.00344727	0.91211	11.0276	0.000728499	0	0.078
CO	EU+_South	ITA	2016	20.4972	192.499	1372.36	0	0	356.057	88.628	42.0088	0	0.00584284	4.95999	64.421	48.8686	0	16.236
CO	EU+_South	MLT	2016	0.00916	0.0504602	0.114739	0	0.0486921	4.59058	0.74682	0.00776309	0	0	0.249578	0	0.0010804	0	0.103513
CO	EU+_South	PRT	2016	5.24899	71.4262	104.946	0.281041	1.20569	56.3507	30.5856	0.745365	0	0	4.85104	1.75234	0.00785545	0	2.061
CO	EU+_WestCentral	AUT	2016	3.97396	176.112	235.313	0	0.702243	57.6047	18.1304	0.171283	0	0.0572855	5.00959	31.8169	3.35576	0	0.009
CO	EU+_WestCentral	BEL	2016	2.45619	175.194	91.0554	0.164543	1.24826	37.468	23.21	0.442606	0	1.38225	2.07476	28.1431	0.117678	0	0.053
CO	EU+_WestCentral	CHE	2016	0.837977	11.4777	37.1501	0.0006012	1.26624	61.3843	9.24614	0.0443228	0	0.00134385	2.9697	31.1078	1.00981	0	1.50094
CO	EU+_WestCentral	DEU	2016	131.887	1016.63	541.195	0.536898	25.9387	573.433	140.311	6.8239	0	7.14455	13.4391	331.797	19.9362	0	0.73
CO	EU+_WestCentral	FRA	2016	19.547	827.447	1161.79	0.914547	0.633889	211.092	130.465	0.930728	0	0.214122	8.40098	198.788	12.7444	0	1.706
CO	EU+_WestCentral	GBR	2016	43.7452	350.03	436.202	9.81383	1.65033	233.347	74.4155	3.19549	0	0.00584284	19.4074	341.292	20.4124	0	0.175
CO	EU+_WestCentral	IRL	2016	18.251	9.54277	21.7562	0	0.194077	36.8082	11.8819	0.0123138	0	0	1.22643	1.46862	0.0662308	0	2.19707
CO	EU+_WestCentral	LUX	2016	0.526712	6.2537	3.84003	0	0.0208021	2.33344	1.1781	0.00109702	0	0.0055507	0.61074	1.70466	0	0	0
CO	EU+_WestCentral	NLD	2016	4.01697	96.7107	86.4502	0	0.301215	240.607	32.2616	16.8367	0	6.5431	3.44854	68.887	8.00596	0	0.039
CO	NON_EU	ALB	2016	0.3704	0.8894	43.8752	0.1784	0	9.4186	14.6	0.04	0	0	0	0.6148	7.3898	0	0.824
CO	NON_EU	BIH	2016	1.5258	25.1354	195.778	0	0	17.6086	18.4252	0.051	0	0	0	0.2638	10.1256	0	0.17
CO	NON_EU	BLR	2016	15.4022	9.274	144.198	0.8878	0	94.6592	29.765	0.8936	0	0.0447458	0	66.4884	22.0456	0	8.087
CO	NON_EU	KOS	2016	0.792	0.4328	63.0414	0	0	4.6916	14.056	0.0524	0	0	0	11.1846	5.7048	0	0.584
CO	NON_EU	MDA	2016	9.285	4.0138	52.2375	0.0048	0	16.7576	4.891	0.1608	0	0	0	0.6954	25.993	0	5.68
CO	NON_EU	MKD	2016	1.2322	3.7974	72.3116	0	0	3.5804	3.9844	0.2462	0	0	0	0.234	6.328	0	0.675
CO	NON_EU	MNE	2016	0.1606	0.061	21.7601	0	0	4.492	3.3024	0.0502	0	0	0	3.84	1.9892	0	3.74349
CO	NON_EU	RUS	2016	135.338	1452.02	2858.85	62.9964	0	1847.81	179.679	21.632	0	2.13	0	737.208	184.843	0	453.025
CO	NON_EU	SRB	2016	5.0586	27.4134	243.443	0.1366	0	32.1464	16.7474	4.1794	0	0.04461	0	45.9886	16.3278	0	5.252
CO	NON_EU	TUR	2016	21.9606	302.745	1579.04	0.0948	0	37.1338	172.614	19.2976	0	0	0	99.4966	174.897	0	227.141
CO	NON_EU	UKR	2016	24.3236	1548.83	750.863	0.2542	0	384.163	71.2368	0.7466	0	0.39	0	97.0088	129.367	0	374.511
CO	EU+_East	BGR	2017	0.631489	19.4562	157.924	0.084046	0	37.0134	9.79215	13.5612	0	0.154469	0.671408	1.66022	0.136648	0	18.639
CO	EU+_East	CZE	2017	9.57702	141.46	563.64	0.00544	1.20024	64.153	10.0789	1.00462	0	0.00108273	0.176583	27.3416	0.0618653	0	0.143
CO	EU+_East	HUN	2017	6.80643	29.365	295.182	0.0728513	0.702384	61.8976	15.8938	0.595584	0	0.0584423	0.272893	8.83709	2.98012	0	1.238
CO	EU+_East	POL	2017	52.9187	279.256	1505.8	0.301672	0.0702612	376.769	117.323	94.352	0	0.00660341	0.540544	94.709	19.6616	0	3.205
CO	EU+_East	ROU	2017	8.14482	80.5056	516.617	0.0774062	1.26912	96.4951	31.0196	0.71628	0	0.224039	0.550088	40.2238	7.2545	0	22.056
CO	EU+_East	SVK	2017	1.77769	148.314	160.682	0	0.509032	25.3832	6.35966	0.25587	0	0.0201752	0.077292	21.573	0.00812012	0	0.076
CO	EU+_East	SVN	2017	1.37726	14.1556	67.7205	0.000423007	0.193039	13.6398	2.98826	0.0598636	0	0	0.687294	4.15412	0.00319594	0	0.385957
CO	EU+_North	DNK	2017	13.2198	6.81484	84.621	0.21336	2.27793	55.4659	10.5621	0.0158678	0	0	1.02916	60.7637	1.06576	0	0.127
CO	EU+_North	EST	2017	6.17517	41.0878	70.1423	0.166327	0.106558	9.97671	1.78001	0.0135462	0	0	0.195948	8.49099	0.011325	0	2.69024
CO	EU+_North	FIN	2017	13.4487	31.0127	173.063	0	0.193167	31.1917	10.5324	0.0486559	0	0.0134957	1.03659	76.544	0	0	0.0746775
CO	EU+_North	ISL	2017	0.00038637	106.252	0.00826593	0	0.0170823	3.72453	0.734253	0	0	0	0.267515	0.381475	0.133164	0	0
CO	EU+_North	LTU	2017	8.59926	5.25412	91.029	0	0.17167	18.5959	8.2481	5.25132	0	0.0092491	0.346937	1.98027	0.000155788	0	0.733
CO	EU+_North	LVA	2017	2.73777	10.4685	84.3158	0	3.67811	10.5648	3.0131	0.811052	0	0	0.414223	8.37022	0.000582344	0	4.27826
CO	EU+_North	NOR	2017	8.76592	178.458	93.817	0.589572	0.331397	23.278	13.5026	1.64513	0	0	2.4202	106.29	0.0378724	0	0.101
CO	EU+_North	SWE	2017	5.82741	33.8812	115.336	0.0698298	0.229524	51.0762	12.161	0.146772	0	0	1.53357	144.167	0.746854	0	0.108
CO	EU+_South	CYP	2017	0.36563	2.64806	0.739443	0	0.0668013	7.02788	2.48413	0.00900516	0	0	0.267417	0.117918	0.0389099	0	0.165
CO	EU+_South	ESP	2017	24.9794	487.458	467.715	0.985909	3.563	111.987	54.3894	0.369073	0	0	5.42547	29.5888	0.642348	0	10.634
CO	EU+_South	GRC	2017	15.3596	40.1973	61.0611	0	0.845931	175.226	22.3447	1.9671	0	0	1.12458	19.5913	9.56867e-05	0	6.041
CO	EU+_South	HRV	2017	0.95682	37.7319	113.994	0.189747	0.510885	22.1164	7.92384	0.56982	0	0.00346195	0.966952	10.7463	0.00076944	0	0.078
CO	EU+_South	ITA	2017	21.8364	175.619	1497.07	0	0	324.574	84.87	41.2598	0	0.00586771	5.09429	56.7422	45.9496	0	16.236
CO	EU+_South	MLT	2017	0.509385	0.0453008	0.105117	0	0.0476252	4.56179	0.774337	0.00903681	0	0	0.297826	0	0.000507841	0	0.103513
CO	EU+_South	PRT	2017	5.66863	92.8775	104.036	0.284517	1.22527	52.416	30.0109	0.653697	0	0	5.25374	1.78702	0.00681461	0	2.061
CO	EU+_WestCentral	AUT	2017	4.03679	172.997	237.245	0	0.690637	54.6477	17.8986	0.177704	0	0.0592887	3.91043	31.3492	3.15358	0	0.009
CO	EU+_WestCentral	BEL	2017	2.66936	118.859	84.4016	0.243732	1.11055	34.0681	21.7158	0.380407	0	1.49119	2.0129	28.0903	0.188311	0	0.053
CO	EU+_WestCentral	CHE	2017	0.888096	11.4379	35.2279	0.0002889	1.29656	57.3794	9.47392	0.0402577	0	0.00134957	2.97417	30.5334	0.975507	0	1.50094
CO	EU+_WestCentral	DEU	2017	130.438	1065.05	514.324	0.518086	26.7767	557.027	140.711	7.36109	0	7.32956	13.4111	353.528	19.7408	0	0.73
CO	EU+_WestCentral	FRA	2017	22.1398	858.655	1099.51	0.821544	0.584292	203.461	124.317	0.939317	0	0.19448	8.3953	190.509	12.6746	0	1.706
CO	EU+_WestCentral	GBR	2017	41.0773	361.292	434.991	10.4762	1.59894	200.788	66.9707	3.05026	0	0.00586771	18.482	355.429	20.3381	0	0.175
CO	EU+_WestCentral	IRL	2017	15.2841	10.6718	19.9564	0	0.198821	28.468	10.289	0.0113431	0	0	1.28255	1.49191	0.0628826	0	2.19707
CO	EU+_WestCentral	LUX	2017	0.660094	7.38073	3.37234	0	0.0212342	2.2232	1.16372	0.00126145	0	0.00572101	0.631295	1.70145	0	0	0
CO	EU+_WestCentral	NLD	2017	3.78014	90.1023	87.1722	0	0.294376	244.563	34.2067	17.1754	0	6.60017	3.42171	68.6345	8.10159	0	0.039
CO	NON_EU	ALB	2017	0.3928	0.9158	43.8754	0.1738	0	8.5492	14.542	0.033	0	0	0	0.6116	7.4436	0	0.824
CO	NON_EU	BIH	2017	1.5056	25.5188	195.591	0	0	15.6412	18.1584	0.044	0	0	0	0.2636	10.2232	0	0.17
CO	NON_EU	BLR	2017	14.0874	9.356	144.249	0.8426	0	90.0114	30.069	0.8512	0	0.0447458	0	66.2288	22.2102	0	8.087
CO	NON_EU	KOS	2017	0.773	0.4426	63.039	0	0	4.2412	13.908	0.0488	0	0	0	11.0572	5.8026	0	0.584
CO	NON_EU	MDA	2017	8.11	4.0446	52.2953	0.0046	0	15.4512	4.757	0.1466	0	0	0	0.6928	26.159	0	5.68
CO	NON_EU	MKD	2017	1.1584	3.8568	72.3188	0	0	3.3878	4.2648	0.2234	0	0	0	0.236	6.412	0	0.675
CO	NON_EU	MNE	2017	0.1632	0.061	21.7319	0	0	4.053	3.2508	0.0474	0	0	0	3.798	1.9714	0	3.74349
CO	NON_EU	RUS	2017	136.731	1455.64	2858.08	62.4388	0	1646.87	171.705	22.927	0	2.13	0	733.311	186.109	0	453.025
CO	NON_EU	SRB	2017	4.9402	27.9278	243.018	0.1332	0	28.5918	16.4788	3.5838	0	0.04461	0	45.4542	16.2386	0	5.252
CO	NON_EU	TUR	2017	20.9262	318.143	1580.33	0.0936	0	34.0486	167.812	18.9202	0	0	0	103.352	177.578	0	227.141
CO	NON_EU	UKR	2017	22.7692	1604.76	748.385	0.2414	0	349.304	67.6306	0.7642	0	0.39	0	96.7246	130.315	0	374.511
NH3	EU+_East	BGR	2000	0	0.888979	1.84793	0	0	0.229929	0.0324745	0.0235478	0	0	0	0.002194	3.88567	39.887	7.59197
NH3	EU+_East	CZE	2000	0	0.575547	2.90995	0	0.0801848	1.10945	0.0384734	0.00594822	0	0	0	0.0103565	0.000164	39.1491	42.7703
NH3	EU+_East	HUN	2000	0.0010443	0.856711	3.49031	0	0.0734213	0.385787	0.0187683	0.00199341	0	0	0	0.00372643	2.03987	50.6912	35.6397
NH3	EU+_East	POL	2000	0	2.79333	6.70366	0	0.0158535	3.78685	0.0844532	0.138396	0	0	0	0.021715	7.01059	128.49	181.689
NH3	EU+_East	ROU	2000	0	0.748124	8.19344	0	0.182004	0.24914	0.0150235	0.000853906	0	0	0	0.00909208	13.7601	96.4262	118.456
NH3	EU+_East	SVK	2000	0	0.474775	0.904025	0	0.0220155	0.336392	0.0105696	0.00200645	0	0	0	0.000885579	0.997869	14.7304	24.3931
NH3	EU+_East	SVN	2000	0	0.0563927	1.06743	0	0.0155625	0.554593	0.0174598	0	0	0	0	0.00103442	0.478327	9.08037	10.3115
NH3	EU+_North	DNK	2000	0.00865145	0.757126	1.21465	0	0.0486184	2.45943	0.0555664	0	0	0	0.00017617	0.00518399	0.540962	46.743	45.0987
NH3	EU+_North	EST	2000	0.1755	0.180053	0.072857	0.01	0.008088	0.0904612	0.00437582	0	0	0	0	0.000702	0.004562	3.19958	5.06627
NH3	EU+_North	FIN	2000	0.001	1.11618	0.894553	0	0.232995	1.86384	0.0511748	0.00211286	0	0	0	0.00638674	0.422307	17.2297	12.3579
NH3	EU+_North	ISL	2000	1.815e-05	0.0217712	1.74e-06	0	0.0019545	0.131569	0.00102972	0	0	0	0	0	0.00048	2.3927	2.78381
NH3	EU+_North	LTU	2000	0.130308	0.517005	1.69027	0	0.0327846	0.0648628	0.00653604	0.00457574	0	0	0	0.000866424	0.538198	12.4954	10.3749
NH3	EU+_North	LVA	2000	0	0.0997563	2.0286	0	0.00881035	0.0615771	0.00396794	0.00205094	0	0	0	0.00143846	0.222135	7.45647	4.32836
NH3	EU+_North	NOR	2000	0	0.70558	0.0762368	0	0.0198156	1.68679	0.108231	0.0665459	0	0	0	0.00456623	0.290815	10.2794	18.8695
NH3	EU+_North	SWE	2000	0.177859	2.96578	0.20459	0.00138906	0.023234	4.62028	0.0699095	0	0	0	0	0.0134548	1.1659	23.9744	26.5191
NH3	EU+_South	CYP	2000	0	0.00129059	0.00324559	0	0.0443823	0.17485	0.00395122	0	0	0	0	0.000190522	0	5.15566	1.92877
NH3	EU+_South	ESP	2000	0	33.8583	5.84521	0	0.0873151	5.34847	0.569899	0.00600602	0	0	0	0.0239429	11.8385	223.691	269.742
NH3	EU+_South	GRC	2000	0	0.401546	1.07234	0	0.184322	1.56932	0.0211619	0.00509501	0	0	0	0.0082286	0.00756	24.1719	47.7482
NH3	EU+_South	HRV	2000	0.00935147	3.65805	2.8377	0	0.0561536	0.352472	0.00787671	0.00358679	0	0	3.13914e-05	0.00219306	0.657739	14.3136	23.3672
NH3	EU+_South	ITA	2000	0.122281	0.646057	1.00084	12.2625	0	18.3317	0.991227	0.610976	0	0	0	0.0212375	7.43963	242.748	174.413
NH3	EU+_South	MLT	2000	0	0	0	0	0.0053549	0.058192	0.000970409	0	0	0	0	0	0	0.648076	0.403503
NH3	EU+_South	PRT	2000	0.0131581	9.04692	2.89237	0.167156	0.112193	1.30924	0.128189	0.0012403	0	0	0	0.00123486	2.59192	26.9169	32.7565
NH3	EU+_WestCentral	AUT	2000	0.140483	0.515464	0.661382	0	0.0661177	2.58859	0.193132	0	0	0	0.000556679	0.0133621	0.826764	27.7268	30.9651
NH3	EU+_WestCentral	BEL	2000	0.0582726	1.81827	0.814869	0	0.135402	2.57232	0.344779	0.0119333	0	0	0	0.00355343	0.06378	44.1604	41.9238
NH3	EU+_WestCentral	CHE	2000	0.0187217	0.326894	0.115762	0	1.23672	5.08132	0.0378442	0	0	0	0	0.00255303	0.892825	23.5085	28.5245
NH3	EU+_WestCentral	DEU	2000	1.88266	14.4385	3.09088	0	1.79159	27.2614	1.27642	0.0535767	0	0	0.122579	0.111992	2.25548	275.221	334.828
NH3	EU+_WestCentral	FRA	2000	0.031399	7.6881	19.9937	0	0.0226221	10.4092	0.904477	0.0547352	0	0	0	0.0317332	1.90782	267.103	335.879
NH3	EU+_WestCentral	GBR	2000	0.011688	5.89571	0.649695	0	12.722	25.0455	1.10112	0.0517698	0	0	0	0.0385516	8.31812	119.626	132.584
NH3	EU+_WestCentral	IRL	2000	0	0.148711	0.057716	0	0.0337876	1.62448	0.0549449	0.0139743	0	0	0	0.00204756	0	52.0512	61.1604
NH3	EU+_WestCentral	LUX	2000	0.00017626	0	0.0443921	0	0.00173519	0.264861	0.0156131	0	0	0	0	0.000516695	0.0638787	2.57277	3.22808
NH3	EU+_WestCentral	NLD	2000	0.037809	2.7056	0.876101	0	9.652	4.11578	0.194307	0.0373095	0	0	0	0.00997573	0.436602	75.3008	82.9509
NH3	NON_EU	ALB	2000	0.001	0.0035	0.0673302	0	0	0.0228462	0.00173077	0	0	0	0	0.001	0	16.7959	0.359231
NH3	NON_EU	BIH	2000	0.0015	0.06	0.330271	0	0	0.073646	0.00235398	0	0	0	0	0	0	13.238	0.585156
NH3	NON_EU	BLR	2000	0.11713	0.0151429	0.319338	0.001	0	0.108602	0.0030903	0.00595987	0	0	0	0.0161053	0	93.2549	1.0996
NH3	NON_EU	KOS	2000	0.001	0.016	0.087896	0	0	0.00459538	0.000520231	0	0	0	0	0.001	0	4.745	0.725746
NH3	NON_EU	MDA	2000	0.0084	0.00075	0.103938	0	0	0.0024	0.0003	0	0	0	0	0.002	0	15.622	0.572013
NH3	NON_EU	MKD	2000	0.009	0.005	0.112637	0	0	0.0323265	0.00168367	0.000336735	0	0	0	0	0	8.468	0.518942
NH3	NON_EU	MNE	2000	0	0.0036	0.0340136	0	0	0.00813514	0.000378378	0	0	0	0	0	0	1.878	0.421111
NH3	NON_EU	RUS	2000	1.64808	20.4128	5.89324	0.05208	0	1.83141	0.0179142	0.00562422	0	0	0	10.1444	0	447.095	62.7568
NH3	NON_EU	SRB	2000	0.0173333	0.240586	0.469145	0.001	0	0.0743437	0.00065625	0.00253125	0	0	0	0.00133333	0	45.7805	10.2803
NH3	NON_EU	TUR	2000	0.161118	0.100056	3.11351	0	0	2.3133	0.101471	0.00241598	0	0	0	0.154465	0	306.018	12.9968
NH3	NON_EU	UKR	2000	0.21018	6.34386	2.0116	0	0	0.230901	0.00355232	0.00937812	0	0	0	0.0912632	0	262.781	29.9224
NH3	EU+_East	BGR	2001	0	2.61318	1.38492	0	0	0.251155	0.0353063	0.0261332	0	0	0	0.002023	3.72586	34.2641	8.74367
NH3	EU+_East	CZE	2001	0	0.465886	3.07218	0.0063	0.0704816	1.05445	0.039043	0.00566207	0	0	0	0.0100718	0.00041646	39.169	43.514
NH3	EU+_East	HUN	2001	0.0010587	0.652821	3.98196	0	0.0800067	0.534307	0.021915	0.00249588	0	0	0	0.0033022	1.7352	48.8719	35.7584
NH3	EU+_East	POL	2001	0	2.78523	7.37442	0	0.0138332	4.53299	0.0948886	0.167782	0	0	0	0.0202937	6.66727	129.669	184.918
NH3	EU+_East	ROU	2001	0	0.85446	8.19459	0	0.182004	0.342228	0.0206368	0.00117296	0	0	0	0.00831276	13.7601	95.426	112.946
NH3	EU+_East	SVK	2001	0	0.462533	1.02975	0	0.0277269	0.416824	0.012075	0.00249469	0	0	0	0.00085551	0.946929	15.44	24.9321
NH3	EU+_East	SVN	2001	0	0.122536	1.07085	0	0.0155625	0.564524	0.0180249	0	0	0	0	0.000971066	0.462462	8.96166	10.2356
NH3	EU+_North	DNK	2001	0.00906236	0.774514	1.26917	0	0.046518	2.48034	0.0601344	0	0	0	0.000172646	0.00541462	0.509159	48.1666	42.0181
NH3	EU+_North	EST	2001	0.144921	0.267958	0.088803	0.01	0.008086	0.114361	0.00562755	0	0	0	0	0.000692	0.004305	3.61922	5.50778
NH3	EU+_North	FIN	2001	0.0027	1.04244	1.00421	0	0.219039	1.89518	0.0520222	0.00214832	0	0	0	0.00639693	0.426647	17.1978	12.4721
NH3	EU+_North	ISL	2001	1.815e-05	0.0206153	1.74e-06	0	0.00185307	0.147051	0.00110997	0	0	0	0	0	0.000480538	2.34108	2.75984
NH3	EU+_North	LTU	2001	0.150785	0.543381	1.69391	0	0.0327846	0.0689729	0.00695021	0.00486569	0	0	0	0.000866424	0.538198	12.5851	11.3087
NH3	EU+_North	LVA	2001	0	0.14268	2.1887	0	0.00872141	0.0724226	0.00466155	0.00224663	0	0	0	0.00148327	0.24798	7.84193	4.40448
NH3	EU+_North	NOR	2001	0	0.67505	0.0795983	0	0.0222599	1.79431	0.113804	0.0708171	0	0	0	0.00486817	0.304136	10.4734	18.6649
NH3	EU+_North	SWE	2001	0.20965	2.8438	0.190523	0.0014091	0.0237152	4.62883	0.069475	0	0	0	0	0.0117007	1.1811	23.6958	26.3143
NH3	EU+_South	CYP	2001	0	0.00127149	0.00386381	0	0.0136599	0.187922	0.00408353	0	0	0	0	0.000192161	0	5.53773	2.08917
NH3	EU+_South	ESP	2001	0.00303548	30.4085	5.84528	0	0.166126	5.402	0.580928	0.00626716	0	0	0	0.0251751	11.0534	230.678	267.075
NH3	EU+_South	GRC	2001	0	0.388923	0.975178	0	0.644449	1.63025	0.0220936	0.00528902	0	0	0	0.0082767	0	23.49	46.7958
NH3	EU+_South	HRV	2001	0.00863476	2.84044	3.13064	0	0.0733471	0.329119	0.00724656	0.00283042	0	0	6.27827e-05	0.0023345	0.654184	14.1495	26.4212
NH3	EU+_South	ITA	2001	0.144018	0.758771	0.929469	11.7449	0	18.0966	0.975381	0.600066	0	0	0	0.0211569	8.0112	246.482	173.6
NH3	EU+_South	MLT	2001	0	0	0	0	0.0053549	0.0569842	0.000950268	0	0	0	0	0	0	0.716239	0.404256
NH3	EU+_South	PRT	2001	0.0129847	8.16333	2.7676	0.221106	0.113383	1.24606	0.124438	0.00118073	0	0	0	0.00127799	2.43925	26.0284	31.0894
NH3	EU+_WestCentral	AUT	2001	0.162884	0.512691	0.70673	0	0.0652263	2.607	0.195853	0	0	0	0.000521087	0.0161359	0.927311	28.064	30.4653
NH3	EU+_WestCentral	BEL	2001	0.0755385	1.59909	0.890613	0	0.19449	2.46257	0.334414	0.0114113	0	0	0	0.00343508	0.06021	44.1009	38.154
NH3	EU+_WestCentral	CHE	2001	0.0207196	0.285101	0.124828	0	1.16082	4.88823	0.0364112	0	0	0	0	0.00257658	0.913752	24.1253	27.7987
NH3	EU+_WestCentral	DEU	2001	1.94593	12.9924	3.5657	0	1.86107	25.5003	1.19947	0.0505411	0	0	0.12032	0.0870655	2.26329	280.021	339.917
NH3	EU+_WestCentral	FRA	2001	0.037994	6.95127	20.4362	0	0.0238692	10.6858	0.981949	0.0580408	0	0	0	0.033668	2.08398	264.515	332.443
NH3	EU+_WestCentral	GBR	2001	0.0152687	5.93136	0.74341	0	12.7165	22.883	1.03443	0.0486969	0	0	0	0.0383949	9.45908	116.757	128.568
NH3	EU+_WestCentral	IRL	2001	0	0.168836	0.0550605	0	0.0335233	1.79717	0.0586922	0.0154634	0	0	0	0.00210235	0.00533592	52.4637	60.1577
NH3	EU+_WestCentral	LUX	2001	0.00017626	0	0.0481271	0	0.0017568	0.254185	0.0149198	0	0	0	0	0.000508291	0.0618179	2.54859	3.0491
NH3	EU+_WestCentral	NLD	2001	0.093708	2.78473	0.858537	0	11.0947	4.53498	0.202922	0.0394597	0	0	0	0.0100118	0.428337	71.3648	78.6563
NH3	NON_EU	ALB	2001	0.001	0.003	0.0674072	0	0	0.0446769	0.00338462	0	0	0	0	0.001	0	16.6	0.37444
NH3	NON_EU	BIH	2001	0.0018	0.0484	0.334751	0	0	0.102717	0.00328319	0	0	0	0	0	0	13.5326	0.582755
NH3	NON_EU	BLR	2001	0.115704	0.0157143	0.320696	0.001	0	0.185282	0.00527224	0.0101679	0	0	0	0.0162842	0	92.3394	1.16967
NH3	NON_EU	KOS	2001	0.001	0.017	0.087896	0	0	0.0142763	0.00161618	0	0	0	0	0.001	0	4.5786	0.801362
NH3	NON_EU	MDA	2001	0.00792	0.0008	0.104495	0	0	0.00352	0.00044	0	0	0	0	0.0022	0	15.3962	0.598672
NH3	NON_EU	MKD	2001	0.0082	0.0042	0.112745	0	0	0.0450612	0.00234694	0.000469388	0	0	0	0	0	8.2312	0.477657
NH3	NON_EU	MNE	2001	0	0.00408	0.0340136	0	0	0.0151081	0.000702703	0	0	0	0	0	0	1.8054	0.43557
NH3	NON_EU	RUS	2001	1.63566	20.467	5.86338	0.060264	0	3.22353	0.0315313	0.00989937	0	0	0	10.8195	0	433.693	62.9347
NH3	NON_EU	SRB	2001	0.0178667	0.257868	0.46523	0.001	0	0.218075	0.001925	0.007425	0	0	0	0.00186667	0	43.947	11.6729
NH3	NON_EU	TUR	2001	0.148694	0.102845	3.13661	0	0	2.23364	0.097977	0.00233278	0	0	0	0.155972	0	303.471	13.0737
NH3	NON_EU	UKR	2001	0.205344	6.61669	2.01072	0	0	0.509721	0.00784185	0.0207025	0	0	0	0.0968105	0	250.751	31.2846
NH3	EU+_East	BGR	2002	0	1.80158	1.67057	0	0	0.307292	0.0417294	0.0322642	0	0	0	0.002049	3.707	34.9755	8.11612
NH3	EU+_East	CZE	2002	0	0.50066	3.1479	0	0.0801564	1.05061	0.0407871	0.00564862	0	0	0	0.0094104	0.00101702	37.4351	42.4953
NH3	EU+_East	HUN	2002	0.0007731	0.519664	2.30864	0	0.0838022	0.679866	0.0250982	0.0029946	0	0	0	0.00342126	1.57536	49.8191	37.58
NH3	EU+_East	POL	2002	0	2.87429	7.38094	0	0.0130002	4.56551	0.0940251	0.169306	0	0	0	0.02018	6.32392	131.585	181.426
NH3	EU+_East	ROU	2002	0	0.960796	8.19574	0	0.182004	0.435316	0.0262501	0.00149201	0	0	0	0.00753343	13.7601	94.4259	107.435
NH3	EU+_East	SVK	2002	0	0.539418	0.996609	0	0.024286	0.404897	0.0127481	0.00245607	0	0	0	0.000831407	0.930479	14.7592	24.8437
NH3	EU+_East	SVN	2002	0	0.133174	1.13289	0	0.01494	0.555692	0.017638	0	0	0	0	0.000940028	0.441917	9.51167	10.7193
NH3	EU+_North	DNK	2002	0.00964446	0.696409	1.27357	0	0.046829	2.5123	0.0615622	0	0	0	0.000170666	0.00538983	0.590746	49.1044	39.4544
NH3	EU+_North	EST	2002	0.13077	0.252367	0.077519	0.01	0.009578	0.1191	0.00585951	0	0	0	0	0.001168	0.003926	3.52297	5.15488
NH3	EU+_North	FIN	2002	0.0429	1.10291	1.03332	0	0.267515	1.91114	0.0529948	0.0021663	0	0	0	0.00641866	0.430987	17.6209	12.7083
NH3	EU+_North	ISL	2002	1.815e-05	0.0209742	1.74e-06	0	0.00224114	0.15345	0.0011561	0	0	0	0	0	0.000480538	2.30678	2.68778
NH3	EU+_North	LTU	2002	0.171262	0.569758	1.69755	0	0.0327846	0.073083	0.00736437	0.00515564	0	0	0	0.000866424	0.538198	12.6749	12.2425
NH3	EU+_North	LVA	2002	0	0.125552	2.16461	0	0.00860124	0.0896002	0.00502606	0.0023509	0	0	0	0.00150397	0.234209	7.77252	4.19727
NH3	EU+_North	NOR	2002	0	0.547925	0.0908318	0	0.0221341	1.82606	0.111559	0.0722133	0	0	0	0.00469376	0.339352	10.5262	18.9283
NH3	EU+_North	SWE	2002	0.232031	2.81489	0.189077	0.0018349	0.0240978	4.50988	0.0667319	0	0	0	0	0.0121126	1.1959	23.8581	25.9854
NH3	EU+_South	CYP	2002	0	0.00119493	0.00313497	0	0.0127872	0.196886	0.00394021	0	0	0	0	0.000195935	0	5.94364	2.02696
NH3	EU+_South	ESP	2002	0.0169072	30.3096	5.84563	0	0.170135	6.1489	0.645516	0.00638484	0	0	0	0.0262747	10.386	226.689	259.5
NH3	EU+_South	GRC	2002	0	0.404774	0.76731	0	0.428858	1.57118	0.0228444	0.00508223	0	0	0	0.008961	0	24.6138	47.1103
NH3	EU+_South	HRV	2002	0.0108939	2.99276	2.99057	0	0.0761525	0.35567	0.00840764	0.00382134	0	0	3.13914e-05	0.002219	0.650629	13.859	24.9208
NH3	EU+_South	ITA	2002	0.164051	0.9633	0.567378	12.1507	0	17.0866	0.933017	0.567273	0	0	0	0.021204	7.72902	237.426	171.505
NH3	EU+_South	MLT	2002	0	0	0	0	0.0053549	0.0557765	0.000930128	0	0	0	0	0	0	0.784402	0.405009
NH3	EU+_South	PRT	2002	0.0139173	8.1654	2.64508	0.201009	0.115156	1.3268	0.12982	0.00125708	0	0	0	0.00132372	2.29822	24.843	30.23
NH3	EU+_WestCentral	AUT	2002	0.158699	0.469619	0.671439	0	0.0657786	2.7346	0.20445	0	0	0	0.000610952	0.0120412	1.02403	27.6777	29.9496
NH3	EU+_WestCentral	BEL	2002	0.082532	1.63007	0.789204	0	0.209172	2.27851	0.314724	0.0105444	0	0	0	0.00331169	0.0666604	42.866	36.8475
NH3	EU+_WestCentral	CHE	2002	0.0230843	0.324657	0.116503	0	1.13195	4.56448	0.0343918	0	0	0	0	0.00309833	0.931621	24.4233	26.6671
NH3	EU+_WestCentral	DEU	2002	1.92212	13.6384	3.17326	0	1.70458	24.8141	1.16835	0.0493375	0	0	0.114896	0.0904415	2.6566	275.191	329.719
NH3	EU+_WestCentral	FRA	2002	0.0620758	6.57423	18.8666	0	0.0239681	10.3852	0.992934	0.0575729	0	0	0	0.0371288	2.27527	259.705	324.834
NH3	EU+_WestCentral	GBR	2002	0.0267763	5.84054	0.706754	0	12.6908	21.375	0.977899	0.0456905	0	0	0	0.038115	9.43841	112.883	130.109
NH3	EU+_WestCentral	IRL	2002	0	0.168836	0.0545225	0	0.0345915	1.83223	0.0585935	0.0157674	0	0	0	0.00208047	0.00816312	52.5558	59.889
NH3	EU+_WestCentral	LUX	2002	0.00029184	0	0.0449714	0	0.00177701	0.230458	0.0136841	0	0	0	0	0.000529711	0.0633876	2.4616	2.99376
NH3	EU+_WestCentral	NLD	2002	0.0731537	2.47699	0.837307	0	10.9421	4.8345	0.211316	0.0412717	0	0	0	0.00952479	0.429562	69.2805	73.9982
NH3	NON_EU	ALB	2002	0.001	0.0025	0.0674843	0	0	0.0665077	0.00503846	0	0	0	0	0.001	0	16.404	0.389649
NH3	NON_EU	BIH	2002	0.0021	0.0368	0.339231	0	0	0.131788	0.00421239	0	0	0	0	0	0	13.8272	0.580354
NH3	NON_EU	BLR	2002	0.114278	0.0162857	0.322054	0.001	0	0.261961	0.00745418	0.0143759	0	0	0	0.0164632	0	91.4238	1.23973
NH3	NON_EU	KOS	2002	0.001	0.018	0.087896	0	0	0.0239572	0.00271214	0	0	0	0	0.001	0	4.4122	0.876979
NH3	NON_EU	MDA	2002	0.00744	0.00085	0.105051	0	0	0.00464	0.00058	0	0	0	0	0.0024	0	15.1704	0.625332
NH3	NON_EU	MKD	2002	0.0074	0.0034	0.112853	0	0	0.0577959	0.0030102	0.000602041	0	0	0	0	0	7.9944	0.436371
NH3	NON_EU	MNE	2002	0	0.00456	0.0340136	0	0	0.0220811	0.00102703	0	0	0	0	0	0	1.7328	0.450029
NH3	NON_EU	RUS	2002	1.62325	20.5213	5.83352	0.068448	0	4.61565	0.0451485	0.0141745	0	0	0	11.4947	0	420.291	63.1126
NH3	NON_EU	SRB	2002	0.0184	0.275151	0.461315	0.001	0	0.361806	0.00319375	0.0123187	0	0	0	0.0024	0	42.1135	13.0656
NH3	NON_EU	TUR	2002	0.136271	0.105634	3.15971	0	0	2.15398	0.0944827	0.00224959	0	0	0	0.157479	0	300.925	13.1506
NH3	NON_EU	UKR	2002	0.200508	6.88952	2.00985	0	0	0.78854	0.0121314	0.0320269	0	0	0	0.102358	0	238.722	32.6468
NH3	EU+_East	BGR	2003	0	2.5691	1.72474	0	0	0.340271	0.0469644	0.0360518	0	0	0	0.002036	3.55239	36.6118	7.39207
NH3	EU+_East	CZE	2003	0.000139	0.47214	3.26785	0	0.0928916	1.12295	0.044961	0.00603101	0	0	0	0.00901392	0.000994	35.7552	42.2544
NH3	EU+_East	HUN	2003	0.0005769	0.40101	3.44409	0	0.087694	0.713265	0.0254046	0.00307195	0	0	0	0.00335237	1.34428	50.1468	37.7764
NH3	EU+_East	POL	2003	0	2.94074	7.28046	0	0.0120768	4.84054	0.102048	0.180729	0	0	0	0.0204605	5.98054	124.334	172.137
NH3	EU+_East	ROU	2003	0	1.06713	8.19689	0	0.182004	0.528404	0.0318634	0.00181106	0	0	0	0.00675411	13.7601	93.4257	101.924
NH3	EU+_East	SVK	2003	0	0.496619	1.16903	0	0.022161	0.439618	0.0136979	0.00271335	0	0	0	0.000826374	0.888247	14.1429	23.6846
NH3	EU+_East	SVN	2003	0	0.173208	1.1963	0	0.0147312	0.551453	0.0176095	0	0	0	0	0.000932703	0.422063	8.81647	10.1933
NH3	EU+_North	DNK	2003	0.00979066	0.7067	1.41324	0	0.0489875	2.50341	0.0623282	0	0	0	0.000160963	0.00570021	0.608483	48.3865	38.9403
NH3	EU+_North	EST	2003	0.138215	0.306285	0.075247	0.01	0.009732	0.13134	0.00570817	0	0	0	0	0.001197	0.016161	3.6786	5.55135
NH3	EU+_North	FIN	2003	0.01491	1.22526	1.04406	0	0.267268	1.95831	0.0542334	0.00221973	0	0	0	0.00642565	0.435326	18.1967	12.93
NH3	EU+_North	ISL	2003	1.815e-05	0.0188736	2.55e-06	0	0.00167025	0.15652	0.00136402	0	0	0	0	0	0.000720538	2.27984	2.66424
NH3	EU+_North	LTU	2003	0.191739	0.596134	1.70119	0	0.0327846	0.0771931	0.00777854	0.00544559	0	0	0	0.000866424	0.538198	12.7646	13.1763
NH3	EU+_North	LVA	2003	0	0.122442	2.28326	0	0.00852132	0.109984	0.00544381	0.00249898	0	0	0	0.00162906	0.202974	7.57798	4.60834
NH3	EU+_North	NOR	2003	0	0.519554	0.0899783	0	0.0224175	1.81901	0.10884	0.072026	0	0	0	0.00473632	0.371961	11.0059	19.8561
NH3	EU+_North	SWE	2003	0.25993	3.06993	0.204145	0.00189891	0.023566	4.45077	0.0640152	0	0	0	0	0.0114588	1.22597	23.8327	25.7589
NH3	EU+_South	CYP	2003	0	0.00106722	0.00262155	0	0.00920955	0.225296	0.00428332	0	0	0	0	0.000192499	0	5.91232	1.85174
NH3	EU+_South	ESP	2003	0.0343821	36.422	5.84584	0	0.229552	5.91428	0.627731	0.00662427	0	0	0	0.026949	9.63008	226.877	269.664
NH3	EU+_South	GRC	2003	0	0.340441	0.758329	0	0.358444	1.63429	0.0236912	0.00529078	0	0	0	0.00962954	0	24.4743	46.6468
NH3	EU+_South	HRV	2003	0.0105951	3.70778	3.44402	0	0.0791405	0.376436	0.00892896	0.00411308	0	0	0.000376696	0.00239644	0.647074	14.1233	24.0011
NH3	EU+_South	ITA	2003	0.178344	1.89243	0.90108	13.9182	0	15.7692	0.878843	0.525021	0	0	0	0.0229399	7.66788	235.484	170.463
NH3	EU+_South	MLT	2003	0	0	0	0	0.0053549	0.0545687	0.000909987	0	0	0	0	0	0	0.852565	0.405762
NH3	EU+_South	PRT	2003	0.0147497	8.13864	2.52479	0.186628	0.114091	1.27317	0.125293	0.00120612	0	0	0	0.00107401	2.14699	23.4235	25.3558
NH3	EU+_WestCentral	AUT	2003	0.188068	0.502258	0.693987	0	0.0637574	2.69033	0.202871	0	0	0	0.000637492	0.0135484	1.10618	27.6574	29.8518
NH3	EU+_WestCentral	BEL	2003	0.0810548	1.78982	0.953852	0	0.207112	2.2409	0.311094	0.010369	0	0	0	0.00327152	0.0869238	40.9869	34.998
NH3	EU+_WestCentral	CHE	2003	0.0246248	0.289485	0.118499	0	1.13392	4.33303	0.0328397	0	0	0	0	0.00306827	0.908519	24.2876	26.2371
NH3	EU+_WestCentral	DEU	2003	1.96106	13.8279	3.12269	0	1.7822	23.5522	1.10814	0.0467385	0	0	0.11627	0.0923239	2.65998	278.294	324.618
NH3	EU+_WestCentral	FRA	2003	0.083442	6.81993	20.2891	0	0.0240628	10.0547	0.980679	0.0563027	0	0	0	0.0367091	2.43216	252.651	322.822
NH3	EU+_WestCentral	GBR	2003	0.011381	5.63591	0.793209	0	12.878	19.2163	0.896488	0.0414685	0	0	0	0.0384912	9.54217	112.249	125.807
NH3	EU+_WestCentral	IRL	2003	0	0.160549	0.0513379	0	0.0306044	1.78162	0.0574415	0.0153324	0	0	0	0.002122	0.0113539	52.2548	59.8784
NH3	EU+_WestCentral	LUX	2003	0.000774964	0	0.0454593	0	0.00197342	0.204477	0.0122743	0	0	0	0	0.000522212	0.0639855	2.41352	2.77276
NH3	EU+_WestCentral	NLD	2003	0.0698745	2.63442	0.841651	0	10.7736	4.95041	0.216254	0.0422693	0	0	0	0.00936446	0.410354	65.3453	74.2274
NH3	NON_EU	ALB	2003	0.001	0.002	0.0675613	0	0	0.0883385	0.00669231	0	0	0	0	0.001	0	16.208	0.404859
NH3	NON_EU	BIH	2003	0.0024	0.0252	0.343712	0	0	0.160858	0.00514159	0	0	0	0	0	0	14.1218	0.577953
NH3	NON_EU	BLR	2003	0.112852	0.0168571	0.323412	0.001	0	0.338641	0.00963612	0.0185839	0	0	0	0.0166421	0	90.5082	1.3098
NH3	NON_EU	KOS	2003	0.001	0.019	0.087896	0	0	0.0336382	0.00380809	0	0	0	0	0.001	0	4.2458	0.952595
NH3	NON_EU	MDA	2003	0.00696	0.0009	0.105608	0	0	0.00576	0.00072	0	0	0	0	0.0026	0	14.9446	0.651991
NH3	NON_EU	MKD	2003	0.0066	0.0026	0.112961	0	0	0.0705306	0.00367347	0.000734694	0	0	0	0	0	7.7576	0.395086
NH3	NON_EU	MNE	2003	0	0.00504	0.0340136	0	0	0.0290541	0.00135135	0	0	0	0	0	0	1.6602	0.464488
NH3	NON_EU	RUS	2003	1.61083	20.5755	5.80366	0.076632	0	6.00776	0.0587657	0.0184497	0	0	0	12.1698	0	406.889	63.2905
NH3	NON_EU	SRB	2003	0.0189333	0.292434	0.4574	0.001	0	0.505538	0.0044625	0.0172125	0	0	0	0.00293333	0	40.28	14.4582
NH3	NON_EU	TUR	2003	0.123847	0.108423	3.18281	0	0	2.07432	0.0909885	0.00216639	0	0	0	0.158986	0	298.378	13.2275
NH3	NON_EU	UKR	2003	0.195672	7.16235	2.00898	0	0	1.06736	0.0164209	0.0433512	0	0	0	0.107905	0	226.692	34.0091
NH3	EU+_East	BGR	2004	0	2.8807	1.80365	0	0	0.380881	0.0518752	0.0407063	0	0	0	0.00194	3.50054	36.3133	8.59347
NH3	EU+_East	CZE	2004	3.81e-05	0.343711	3.29978	0	0.0951377	1.09195	0.0462973	0.0059233	0	0	0	0.00935142	0.00122555	34.1564	39.9361
NH3	EU+_East	HUN	2004	0.000443474	0.45286	3.11694	0	0.05431	0.797614	0.0267072	0.00330926	0	0	0	0.00321466	1.10982	47.0975	37.898
NH3	EU+_East	POL	2004	0	3.09072	7.30381	0	0.0129458	5.3586	0.114304	0.201054	0	0	0	0.0208196	5.63716	117.124	169.129
NH3	EU+_East	ROU	2004	0	1.17347	8.19804	0	0.182004	0.621492	0.0374767	0.00213011	0	0	0	0.00597479	13.7601	92.4256	96.4135
NH3	EU+_East	SVK	2004	0	0.458529	1.40777	0	0.0277601	0.439287	0.0151903	0.00275946	0	0	0	0.000886745	0.831767	12.5706	21.7662
NH3	EU+_East	SVN	2004	0	0.188238	1.26127	0	0.0140062	0.501054	0.0164165	0	0	0	0	0.000978838	0.197377	8.14892	9.52612
NH3	EU+_North	DNK	2004	0.0101828	0.797226	1.48325	0	0.047782	2.48725	0.0623875	0	0	0	0.000167632	0.00623195	0.495493	50.2772	36.2429
NH3	EU+_North	EST	2004	0.142915	0.343357	0.07075	0.01	0.009708	0.133475	0.00597069	0	0	0	0	0.001097	0.018264	3.78388	5.66818
NH3	EU+_North	FIN	2004	0.01833	1.54183	1.05099	0	0.342925	1.95155	0.0546433	0.0022119	0	0	0	0.00643963	0.439666	18.1948	12.9631
NH3	EU+_North	ISL	2004	1.8567e-05	0.0224441	2.25e-06	0	0.00183715	0.157554	0.00145995	0	0	0	0	0	0.000748812	2.24693	2.61815
NH3	EU+_North	LTU	2004	0.212216	0.62251	1.70483	0	0.0327846	0.0813032	0.0081927	0.00573554	0	0	0	0.000866424	0.538198	12.8543	14.1102
NH3	EU+_North	LVA	2004	0	0.174129	2.3324	0	0.0123387	0.13102	0.00580292	0.00263824	0	0	0	0.0017497	0.231068	7.26742	4.37611
NH3	EU+_North	NOR	2004	0	0.548022	0.0844849	0	0.0246236	1.80402	0.105555	0.0715298	0	0	0	0.00470566	0.330484	10.9975	19.9364
NH3	EU+_North	SWE	2004	0.252323	2.99974	0.197458	0.0016087	0.0225719	4.35986	0.0608603	0	0	0	0	0.0108997	1.21072	23.9678	26.0602
NH3	EU+_South	CYP	2004	0	0.000306757	0.00209012	0	0.0137017	0.227759	0.00409535	0	0	0	0	0.000177776	0	5.81123	1.84845
NH3	EU+_South	ESP	2004	0.0426827	33.2295	5.91603	0	0.416942	5.67997	0.6044	0.00650774	0	0	0	0.0279604	8.86915	231.603	264.604
NH3	EU+_South	GRC	2004	0	1.93074	0.861494	0	0.344826	1.7057	0.0244596	0.005528	0	0	0	0.00832686	0.00053088	24.8295	47.3007
NH3	EU+_South	HRV	2004	0.0103148	4.69993	3.36281	0	0.0591624	0.379685	0.0091014	0.00423736	0	0	0.000345305	0.00239325	0.643518	14.946	25.33
NH3	EU+_South	ITA	2004	0.218875	3.50802	0.570642	17.0871	0	14.9565	0.842769	0.498846	0	0	0	0.0235514	7.43179	228.588	169.455
NH3	EU+_South	MLT	2004	0	0	0	0	0.0053549	0.053361	0.000889847	0	0	0	0	0	0	0.920728	0.406515
NH3	EU+_South	PRT	2004	0.0147399	8.98815	2.40674	0.176336	0.115152	1.22465	0.121338	0.00116004	0	0	0	0.00101322	1.96903	22.6212	25.4314
NH3	EU+_WestCentral	AUT	2004	0.196113	0.509556	0.665533	0	0.0617506	2.50373	0.19066	0	0	0	0.000735751	0.0136236	1.35377	27.6261	29.6858
NH3	EU+_WestCentral	BEL	2004	0.0802528	1.99307	1.0357	0	0.214813	1.99826	0.284957	0.00923744	0	0	0	0.00337929	0.119507	40.4468	30.5635
NH3	EU+_WestCentral	CHE	2004	0.0254672	0.292049	0.115684	0	1.11229	4.09274	0.0315956	0	0	0	0	0.00311639	0.91872	24.2736	26.3605
NH3	EU+_WestCentral	DEU	2004	1.95824	13.8492	2.84148	0	1.70602	22.4523	1.05642	0.0444801	0	0	0.117781	0.0800789	2.69145	272.12	320.886
NH3	EU+_WestCentral	FRA	2004	0.0884763	6.7938	20.3972	0	0.023888	9.67993	0.979927	0.0550849	0	0	0	0.0373575	2.52111	247.49	320.651
NH3	EU+_WestCentral	GBR	2004	0.0139491	5.69083	0.829723	0	12.9249	17.9168	0.84592	0.0388385	0	0	0	0.0398805	10.0736	113.798	131.361
NH3	EU+_WestCentral	IRL	2004	0	0.191697	0.0502661	0	0.0263004	1.77794	0.0584505	0.0152991	0	0	0	0.00206738	0.0118987	52.3406	58.8205
NH3	EU+_WestCentral	LUX	2004	0.000890544	0	0.0473232	0	0.00188152	0.175583	0.0106229	0	0	0	0	0.000516278	0.0613943	2.43691	2.94052
NH3	EU+_WestCentral	NLD	2004	0.177904	3.22695	0.876826	0	10.6227	5.00147	0.223568	0.0436749	0	0	0	0.00936688	0.426127	65.9588	71.2426
NH3	NON_EU	ALB	2004	0.001	0.0015	0.0676383	0	0	0.110169	0.00834615	0	0	0	0	0.001	0	16.012	0.420068
NH3	NON_EU	BIH	2004	0.0027	0.0136	0.348192	0	0	0.189929	0.0060708	0	0	0	0	0	0	14.4164	0.575553
NH3	NON_EU	BLR	2004	0.111426	0.0174286	0.32477	0.001	0	0.41532	0.0118181	0.022792	0	0	0	0.0168211	0	89.5926	1.37987
NH3	NON_EU	KOS	2004	0.001	0.02	0.087896	0	0	0.0433191	0.00490405	0	0	0	0	0.001	0	4.0794	1.02821
NH3	NON_EU	MDA	2004	0.00648	0.00095	0.106165	0	0	0.00688	0.00086	0	0	0	0	0.0028	0	14.7188	0.67865
NH3	NON_EU	MKD	2004	0.0058	0.0018	0.113069	0	0	0.0832653	0.00433673	0.000867347	0	0	0	0	0	7.5208	0.3538
NH3	NON_EU	MNE	2004	0	0.00552	0.0340136	0	0	0.036027	0.00167568	0	0	0	0	0	0	1.5876	0.478947
NH3	NON_EU	RUS	2004	1.59842	20.6298	5.7738	0.084816	0	7.39988	0.0723828	0.0227248	0	0	0	12.8449	0	393.487	63.4684
NH3	NON_EU	SRB	2004	0.0194667	0.309717	0.453485	0.001	0	0.649269	0.00573125	0.0221063	0	0	0	0.00346667	0	38.4465	15.8508
NH3	NON_EU	TUR	2004	0.111424	0.111211	3.20591	0	0	1.99466	0.0874942	0.0020832	0	0	0	0.160493	0	295.832	13.3044
NH3	NON_EU	UKR	2004	0.190836	7.43517	2.00811	0	0	1.34618	0.0207105	0.0546756	0	0	0	0.113453	0	214.663	35.3713
NH3	EU+_East	BGR	2005	0	2.94572	1.76071	0	0	0.438181	0.0592719	0.0471586	0	0	0	0.002115	3.4827	34.9393	8.32087
NH3	EU+_East	CZE	2005	0.0003929	0.416179	3.38095	0	0.096783	1.04809	0.0491853	0.0057594	0	0	0	0.00926142	0.08917	33.603	38.5085
NH3	EU+_East	HUN	2005	0.000908462	0.645257	2.91184	0	0.0642153	1.21933	0.0344366	0.00463201	0	0	0	0.0030612	0.929064	44.3074	35.9417
NH3	EU+_East	POL	2005	0	3.05442	7.1255	0	0.0109806	5.60572	0.127354	0.213394	0	0	0	0.0212509	5.29378	125.556	177.298
NH3	EU+_East	ROU	2005	0	1.2798	8.1992	0	0.182004	0.71458	0.04309	0.00244916	0	0	0	0.00519547	13.7601	91.4254	90.9028
NH3	EU+_East	SVK	2005	0	0.332927	2.04974	0	0.102518	0.504631	0.0182444	0.00323011	0	0	0	0.000920816	0.785677	12.4476	21.6955
NH3	EU+_East	SVN	2005	0	0.21283	1.30493	0	0.0141619	0.67021	0.0213529	0	0	0	0	0.000986791	0.131799	8.3359	9.67229
NH3	EU+_North	DNK	2005	0.0102767	0.745968	1.64469	0	0.0448806	2.36251	0.060502	0	0	0	0.000167533	0.00641489	0.529533	47.2235	35.7728
NH3	EU+_North	EST	2005	0.158376	0.448924	0.064119	0.05	0.02078	0.191391	0.00693385	0	0	0	0	0.001069	0.025252	3.82737	5.51112
NH3	EU+_North	FIN	2005	0.01112	1.52596	1.03013	0	0.378048	1.93571	0.0545489	0.00219381	0	0	0	0.00641007	0.46736	18.6608	13.1423
NH3	EU+_North	ISL	2005	1.785e-05	0.0245499	1.74e-06	0	0.00159635	0.152913	0.0014934	0	0	0	0	0	0.00123203	2.27352	2.64643
NH3	EU+_North	LTU	2005	0.232693	0.648886	1.70847	0	0.0327846	0.0854133	0.00860687	0.00602549	0	0	0	0.000866424	0.538198	12.944	15.044
NH3	EU+_North	LVA	2005	0	0.204801	2.33233	0	0.00715895	0.198156	0.00718219	0.00331759	0	0	0	0.00173894	0.226784	7.32689	4.73502
NH3	EU+_North	NOR	2005	0	0.5374	0.084795	0	0.0128156	1.82492	0.10423	0.0724692	0	0	0	0.00474243	0.331303	11.1102	19.9032
NH3	EU+_North	SWE	2005	0.262606	2.9081	0.18868	0.00216114	0.0237347	4.27517	0.0598806	0	0	0	0	0.0119574	1.17821	23.4065	25.5863
NH3	EU+_South	CYP	2005	0	0.0015762	0.00238627	0	0.0119399	0.295507	0.00437529	0	0	0	0	0.000177728	0	5.36091	1.78635
NH3	EU+_South	ESP	2005	0.0565647	34.748	5.92764	0	0.422934	5.3588	0.574823	0.00656354	0	0	0	0.0289458	8.03777	227.623	238.799
NH3	EU+_South	GRC	2005	0	1.73436	0.741163	0	0.280813	1.995	0.0257341	0.00645337	0	0	0	0.00842153	0.00365184	24.8186	45.0715
NH3	EU+_South	HRV	2005	0.00968605	3.87331	3.55917	0	0.0607311	0.397748	0.00907051	0.00406127	0	0	0.000345305	0.00253891	0.639965	15.0788	23.9391
NH3	EU+_South	ITA	2005	0.197006	4.2262	0.975068	13.2581	0	13.4553	0.784222	0.451688	0	0	0	0.0230366	7.54787	225.083	160.624
NH3	EU+_South	MLT	2005	0	0	0	0	0.0053549	0.0521532	0.000869706	0	0	0	0	0	0	0.988891	0.407268
NH3	EU+_South	PRT	2005	0.0147274	8.75231	2.29093	0.148404	0.119261	1.59508	0.147937	0.00151165	0	0	0	0.00138204	1.73521	21.9866	25.2592
NH3	EU+_WestCentral	AUT	2005	0.225355	0.585122	0.629367	0	0.0571354	2.3044	0.179494	0	0	0	0.000702417	0.0140974	1.45208	27.729	29.488
NH3	EU+_WestCentral	BEL	2005	0.0874706	1.83683	1.06668	0	0.224848	1.79641	0.261939	0.00829158	0	0	0	0.00341164	0.103221	39.9216	30.0693
NH3	EU+_WestCentral	CHE	2005	0.0263772	0.298228	0.120028	0	1.11124	3.82539	0.0306108	0	0	0	0	0.0030507	0.913297	24.9303	26.81
NH3	EU+_WestCentral	DEU	2005	1.93541	13.8478	2.82514	0	1.47138	20.4522	0.973172	0.0406171	0	0	0.130763	0.0804724	2.66335	275.662	319.547
NH3	EU+_WestCentral	FRA	2005	0.10312	7.07415	19.8615	0	0.0230359	9.03762	0.975911	0.0531973	0	0	0	0.0353642	2.62736	244.875	319.421
NH3	EU+_WestCentral	GBR	2005	0.0176699	6.6857	0.878028	0	13.1111	16.5903	0.79196	0.036016	0	0	0	0.0398981	10.2525	110.575	125.544
NH3	EU+_WestCentral	IRL	2005	0	0.246976	0.0528429	0	0.0270902	2.40475	0.0717992	0.020702	0	0	0	0.00216983	0.0192648	52.5951	57.9357
NH3	EU+_WestCentral	LUX	2005	0.00172301	0.0325945	0.0455063	0	0.00166108	0.145154	0.00905768	0	0	0	0	0.000477081	0.061501	2.39512	2.78853
NH3	EU+_WestCentral	NLD	2005	0.255718	2.43734	0.90679	0	11.127	5.01803	0.225144	0.0438918	0	0	0	0.00963042	0.44789	64.9576	69.2113
NH3	NON_EU	ALB	2005	0.001	0.001	0.0677153	0	0	0.132	0.01	0	0	0	0	0.001	0	15.816	0.435277
NH3	NON_EU	BIH	2005	0.003	0.002	0.352672	0	0	0.219	0.007	0	0	0	0	0	0	14.711	0.573152
NH3	NON_EU	BLR	2005	0.11	0.018	0.326128	0.001	0	0.492	0.014	0.027	0	0	0	0.017	0	88.677	1.44994
NH3	NON_EU	KOS	2005	0.001	0.021	0.087896	0	0	0.053	0.006	0	0	0	0	0.001	0	3.913	1.10383
NH3	NON_EU	MDA	2005	0.006	0.001	0.106721	0	0	0.008	0.001	0	0	0	0	0.003	0	14.493	0.705309
NH3	NON_EU	MKD	2005	0.005	0.001	0.113177	0	0	0.096	0.005	0.001	0	0	0	0	0	7.284	0.312515
NH3	NON_EU	MNE	2005	0	0.006	0.0340136	0	0	0.043	0.002	0	0	0	0	0	0	1.515	0.493406
NH3	NON_EU	RUS	2005	1.586	20.684	5.74394	0.093	0	8.792	0.086	0.027	0	0	0	13.52	0	380.085	63.6463
NH3	NON_EU	SRB	2005	0.02	0.327	0.44957	0.001	0	0.793	0.007	0.027	0	0	0	0.004	0	36.613	17.2434
NH3	NON_EU	TUR	2005	0.099	0.114	3.22901	0	0	1.915	0.084	0.002	0	0	0	0.162	0	293.285	13.3813
NH3	NON_EU	UKR	2005	0.186	7.708	2.00724	0	0	1.625	0.025	0.066	0	0	0	0.119	0	202.633	36.7336
NH3	EU+_East	BGR	2006	0	2.72551	1.86424	0	0	0.512482	0.0717822	0.0674382	0	0	0	0.002267	3.44647	34.6888	8.04013
NH3	EU+_East	CZE	2006	0.0003145	0.473451	3.50633	0	0.0998135	1.01191	0.0553941	0.00565892	0	0	0	0.0089953	0.0734964	33.087	38.6806
NH3	EU+_East	HUN	2006	0.00116797	0.705297	3.11846	0	0.087292	1.09101	0.0437916	0.00472283	0	0	0	0.00335643	0.794287	43.2163	36.9256
NH3	EU+_East	POL	2006	0	3.06479	7.40202	0	0.00841976	5.77567	0.170738	0.227877	0	0	0	0.0159745	4.95038	128.92	186.271
NH3	EU+_East	ROU	2006	0	1.05715	7.71708	0	0.168217	0.626165	0.0683413	0.00191614	0	0	0	0.00524756	13.4401	92.5933	89.7292
NH3	EU+_East	SVK	2006	0	0.214269	1.96049	0	0.026366	0.435508	0.021001	0.00299236	0	0	0	0.000883304	0.807129	12.0422	20.8225
NH3	EU+_East	SVN	2006	0	0.171735	1.33704	0	0.0152512	0.645415	0.02278	0.000902881	0	0	0	0.00117561	0.099268	8.29565	9.81445
NH3	EU+_North	DNK	2006	0.0106054	0.784712	1.73491	0	0.0456102	2.25012	0.077092	0.000191507	0	0	0.000150116	0.00648546	0.566141	44.6683	34.8132
NH3	EU+_North	EST	2006	0.107318	0.312373	0.073653	0.06	0.013603	0.221313	0.00830329	0	0	0	0	0.001125	0.027678	4.00974	5.36141
NH3	EU+_North	FIN	2006	0.00752	1.08752	1.06091	0	0.34114	1.87899	0.0637272	0.00248414	0	0	0	0.00645308	0.471508	18.35	12.9767
NH3	EU+_North	ISL	2006	3.228e-05	0.0292024	1.74e-06	0	0.00158629	0.14937	0.00243042	0	0	0	0	0	0.00195282	2.31517	2.71614
NH3	EU+_North	LTU	2006	0.235523	0.53163	1.76334	0	0.0272973	0.0986747	0.00820589	0.00798821	0	0	0	0.000886949	0.496519	13.1869	15.3559
NH3	EU+_North	LVA	2006	0	0.237729	2.26069	0	0.000876372	0.219931	0.00985583	0.00346633	0	0	0	0.00186534	0.220897	7.37096	4.99431
NH3	EU+_North	NOR	2006	0	0.668505	0.0858606	0	0.0169158	1.68537	0.121039	0.140292	0	0	0	0.0050459	0.334221	11.1356	19.8906
NH3	EU+_North	SWE	2006	0.267097	2.93351	0.173668	0.00802084	0.0223986	4.03149	0.0861448	0.0024532	0	0	0	0.0113696	1.17347	23.0862	25.2758
NH3	EU+_South	CYP	2006	0	0.00278462	0.00196984	0	0.00745736	0.292381	0.00448164	0	0	0	0	0.0001776	0	5.45704	1.72549
NH3	EU+_South	ESP	2006	0.067278	29.5583	5.95074	0	0.384757	4.80985	0.635242	0.0167622	0	0	0	0.0300765	6.79863	217.564	241.865
NH3	EU+_South	GRC	2006	0	1.01318	0.834592	0	0.264203	1.59875	0.0264864	0.00535841	0	0	0	0.0087426	0.019459	25.189	44.4379
NH3	EU+_South	HRV	2006	0.00967478	2.66819	3.17187	0	0.0598513	0.431236	0.0123704	0.00906475	0	0	0.000345305	0.00271037	0.63641	14.3846	23.2155
NH3	EU+_South	ITA	2006	0.200818	3.16071	1.14387	11.8148	0	13.1424	0.884711	0.496377	0	0	0	0.0217343	7.44311	219.916	163.114
NH3	EU+_South	MLT	2006	0	0	0	0	0.0013948	0.052616	0.000879642	0	0	0	0	0	0	1.01748	0.421843
NH3	EU+_South	PRT	2006	0.0138203	7.72755	2.20421	0.176069	0.117896	1.47895	0.162766	0.00162537	0	0	0	0.00131713	1.70353	21.3389	25.1878
NH3	EU+_WestCentral	AUT	2006	0.24804	0.58767	0.627973	0	0.0595863	2.10551	0.199629	0.0033871	0	0	0.000706159	0.0162166	1.47784	27.9147	29.8787
NH3	EU+_WestCentral	BEL	2006	0.103057	2.00861	1.14934	0	0.223066	1.55258	0.2819	0.0072566	0	0	0	0.00354818	0.113948	39.4413	29.8911
NH3	EU+_WestCentral	CHE	2006	0.0289306	0.31239	0.118268	0	1.03698	3.50225	0.0382608	0.00036189	0	0	0	0.00344847	0.914597	25.2289	27.1004
NH3	EU+_WestCentral	DEU	2006	1.93508	15.4588	2.96696	0	1.47483	19.1276	1.07807	0.129483	0	0	0.135659	0.0729511	2.69534	272.65	324.189
NH3	EU+_WestCentral	FRA	2006	0.242512	5.19541	18.2589	0	0.022299	8.2613	1.17876	0.07497	0	0	0	0.0343826	2.9213	243.274	314.121
NH3	EU+_WestCentral	GBR	2006	0.0877231	6.59337	0.914446	0	13.0737	14.9047	0.853167	0.104679	0	0	0	0.0417521	9.57478	109.34	122.238
NH3	EU+_WestCentral	IRL	2006	0	0.251566	0.0543675	0	0.0275397	2.23096	0.07978	0.0166489	0	0	0	0.00209586	0.0191722	51.6881	57.6545
NH3	EU+_WestCentral	LUX	2006	0.0018802	0.0316934	0.0451501	0	0.00156438	0.122549	0.0093288	0	0	0	0	0.000474479	0.0665931	2.36687	2.74042
NH3	EU+_WestCentral	NLD	2006	0.0767458	2.25717	0.94981	0	10.8042	5.10879	0.252295	0.0435392	0	0	0	0.00962064	0.466032	65.0493	72.4872
NH3	NON_EU	ALB	2006	0.0042	0.0008	0.0671153	0	0	0.131	0.0114	0	0	0	0	0.0008	0	15.9816	0.437277
NH3	NON_EU	BIH	2006	0.0068	0.0022	0.346072	0	0	0.2182	0.0092	0.0008	0	0	0	0.0002	0	14.9718	0.573152
NH3	NON_EU	BLR	2006	0.1212	0.019	0.322328	0.001	0	0.557	0.017	0.0246	0	0	0	0.0174	0	90.0784	1.44994
NH3	NON_EU	KOS	2006	0.0028	0.0204	0.089096	0	0	0.0528	0.0062	0.0008	0	0	0	0.0008	0	3.8526	0.975828
NH3	NON_EU	MDA	2006	0.0102	0.0012	0.104521	0	0	0.0126	0.0014	0.0006	0	0	0	0.0026	0	14.4214	0.709309
NH3	NON_EU	MKD	2006	0.0068	0.0012	0.111577	0	0	0.0952	0.006	0.005	0	0	0	0	0	7.1328	0.314515
NH3	NON_EU	MNE	2006	0.0006	0.0056	0.0338136	0	0	0.0436	0.0024	0	0	0	0	0	0	1.4926	0.463406
NH3	NON_EU	RUS	2006	1.4714	20.5302	5.67914	0.0866	0	10.2972	0.0964	0.0446	0	0	0	13.9462	0	360.407	67.0603
NH3	NON_EU	SRB	2006	0.0264	0.3276	0.44337	0.0008	0	0.7004	0.0074	0.0454	0	0	0	0.0042	0	37.2934	15.2456
NH3	NON_EU	TUR	2006	0.2212	0.1092	3.35921	0	0	1.6924	0.1012	0.143	0	0	0	0.1628	0	308.825	13.4973
NH3	NON_EU	UKR	2006	0.2264	7.5786	1.89624	0	0	2.0776	0.0274	0.0602	0	0	0	0.1204	0	204.232	38.3174
NH3	EU+_East	BGR	2007	0	2.86045	1.78173	0	0	0.594333	0.0858678	0.089399	0	0	0	0.001975	3.34581	33.9479	9.27234
NH3	EU+_East	CZE	2007	0.0001793	0.427481	3.61152	0	0.101027	1.22117	0.0697644	0.00706958	0	0	0	0.0091361	0.100254	33.1074	39.0106
NH3	EU+_East	HUN	2007	0.00114744	0.616154	3.33476	0	0.0870786	1.1267	0.043726	0.00446426	0	0	0	0.00336371	0.702373	42.9681	37.1378
NH3	EU+_East	POL	2007	0	3.25004	7.21824	0	0.00765204	5.88935	0.220708	0.238536	0	0	0	0.0147524	4.607	126.556	188.34
NH3	EU+_East	ROU	2007	0	1.15497	8.04042	0	0.130494	0.640699	0.099537	0.00175043	0	0	0	0.00742107	13.1201	89.3746	88.6899
NH3	EU+_East	SVK	2007	0	0.278989	2.17425	0	0.0640596	0.459485	0.0267002	0.00352234	0	0	0	0.000875859	0.679197	11.474	20.7316
NH3	EU+_East	SVN	2007	0	0.134442	1.38153	0	0.0143175	0.612395	0.0243492	0.00180937	0	0	0	0.00105525	0.0683977	8.59219	10.1411
NH3	EU+_North	DNK	2007	0.0113247	0.803433	2.06118	0	0.0429911	2.14604	0.0977282	0.000402656	0	0	0.000158625	0.00685284	0.63506	41.9655	36.332
NH3	EU+_North	EST	2007	0.114783	0.253322	0.086578	0.09	0.016342	0.234972	0.0096396	0	0	0	0	0.001101	0.044563	4.11671	5.39863
NH3	EU+_North	FIN	2007	0.00476	0.815857	1.07022	0	0.309694	1.84806	0.0743368	0.00283697	0	0	0	0.00654421	0.484925	18.2952	12.7918
NH3	EU+_North	ISL	2007	3.59354e-05	0.0326013	2.1e-06	0	0.00173258	0.139812	0.00283784	0	0	0	0	0	0.0024389	2.3727	2.78838
NH3	EU+_North	LTU	2007	0.204443	0.577722	1.70282	0	0.03018	0.118164	0.0103989	0.009876	0	0	0	0.000890384	0.490518	12.7295	15.4487
NH3	EU+_North	LVA	2007	0	0.199322	2.23459	0	0.000241053	0.23817	0.0132282	0.00361393	0	0	0	0.00203429	0.216596	7.54712	5.26216
NH3	EU+_North	NOR	2007	0	0.609702	0.0834669	0	0.0172934	1.54471	0.139999	0.215189	0	0	0	0.00566689	0.287386	11.2146	19.9841
NH3	EU+_North	SWE	2007	0.274003	2.85969	0.182144	0.00713439	0.0202603	3.73905	0.113485	0.00498823	0	0	0	0.0101924	1.21868	23.1254	25.2496
NH3	EU+_South	CYP	2007	0	0.00390162	0.00448862	0	0.00776737	0.297111	0.00469916	0	0	0	0	0.000180536	0	5.53587	1.75092
NH3	EU+_South	ESP	2007	0.0461554	25.4931	5.96627	0	0.468773	4.26664	0.69512	0.0281145	0	0	0	0.0305977	6.28131	220.843	246.917
NH3	EU+_South	GRC	2007	0	0.877175	0.828085	0	0.127042	1.63435	0.028033	0.00569852	0	0	0	0.00783165	0.0210456	25.2491	44.9454
NH3	EU+_South	HRV	2007	0.0113174	2.82947	2.96782	0	0.0605692	0.587018	0.0191299	0.0195097	0	0	0.000345305	0.0028047	0.635486	13.5912	24.1778
NH3	EU+_South	ITA	2007	0.199905	2.36421	1.58794	7.16826	0	11.5722	0.937571	0.495231	0	0	0	0.0212225	7.35533	228.582	164.593
NH3	EU+_South	MLT	2007	0	0	0	0	0.0008984	0.054028	0.000912981	0	0	0	0	0	0	1.06522	0.434541
NH3	EU+_South	PRT	2007	0.0152105	8.72426	2.11768	0.372791	0.0952306	1.36364	0.175507	0.00172864	0	0	0	0.00132077	1.66765	20.7284	26.2461
NH3	EU+_WestCentral	AUT	2007	0.269687	0.685925	0.557257	0	0.0584057	1.89906	0.219869	0.00658563	0	0	0.000753819	0.0164348	1.52373	28.602	30.6619
NH3	EU+_WestCentral	BEL	2007	0.126343	2.10158	1.13895	0	0.285855	1.36205	0.31068	0.00646545	0	0	0	0.0038305	0.121627	37.8313	27.453
NH3	EU+_WestCentral	CHE	2007	0.0307523	0.373664	0.109993	0	1.00695	3.33841	0.0473763	0.000761353	0	0	0	0.00330615	0.908766	25.3125	27.8264
NH3	EU+_WestCentral	DEU	2007	1.93815	13.9684	1.93854	0	1.6252	17.8513	1.17585	0.220138	0	0	0.140378	0.0672384	2.86802	276.572	327.226
NH3	EU+_WestCentral	FRA	2007	0.237414	6.44648	17.4729	0	0.0211258	7.52371	1.34402	0.0959043	0	0	0	0.0324183	2.95393	245.13	319.115
NH3	EU+_WestCentral	GBR	2007	0.0687362	6.27929	0.928765	0	13.1552	13.5124	0.912632	0.170278	0	0	0	0.0421462	9.64776	106.07	122.793
NH3	EU+_WestCentral	IRL	2007	0	0.234101	0.0647334	0	0.0266173	2.06406	0.0883847	0.0126811	0	0	0	0.00202979	0.0174686	50.6591	55.3608
NH3	EU+_WestCentral	LUX	2007	0.00229089	0.0339757	0.0406336	0	0.00158806	0.10418	0.00979137	0	0	0	0	0.000498377	0.0673044	2.44738	2.76114
NH3	EU+_WestCentral	NLD	2007	0.0748926	2.01782	0.953874	0	10.3953	5.00089	0.28442	0.0429471	0	0	0	0.00968051	0.480453	66.0766	68.4547
NH3	NON_EU	ALB	2007	0.0074	0.0006	0.0665153	0	0	0.13	0.0128	0	0	0	0	0.0006	0	16.1472	0.439277
NH3	NON_EU	BIH	2007	0.0106	0.0024	0.339472	0	0	0.2174	0.0114	0.0016	0	0	0	0.0004	0	15.2326	0.573152
NH3	NON_EU	BLR	2007	0.1324	0.02	0.318528	0.001	0	0.622	0.02	0.0222	0	0	0	0.0178	0	91.4798	1.44994
NH3	NON_EU	KOS	2007	0.0046	0.0198	0.090296	0	0	0.0526	0.0064	0.0016	0	0	0	0.0006	0	3.7922	0.847828
NH3	NON_EU	MDA	2007	0.0144	0.0014	0.102321	0	0	0.0172	0.0018	0.0012	0	0	0	0.0022	0	14.3498	0.713309
NH3	NON_EU	MKD	2007	0.0086	0.0014	0.109977	0	0	0.0944	0.007	0.009	0	0	0	0	0	6.9816	0.316515
NH3	NON_EU	MNE	2007	0.0012	0.0052	0.0336136	0	0	0.0442	0.0028	0	0	0	0	0	0	1.4702	0.433406
NH3	NON_EU	RUS	2007	1.3568	20.3764	5.61434	0.0802	0	11.8024	0.1068	0.0622	0	0	0	14.3724	0	340.728	70.4743
NH3	NON_EU	SRB	2007	0.0328	0.3282	0.43717	0.0006	0	0.6078	0.0078	0.0638	0	0	0	0.0044	0	37.9738	13.2478
NH3	NON_EU	TUR	2007	0.3434	0.1044	3.48941	0	0	1.4698	0.1184	0.284	0	0	0	0.1636	0	324.365	13.6133
NH3	NON_EU	UKR	2007	0.2668	7.4492	1.78524	0	0	2.5302	0.0298	0.0544	0	0	0	0.1218	0	205.832	39.9012
NH3	EU+_East	BGR	2008	0	2.70681	1.87632	0	0	0.603326	0.0929614	0.100702	0	0	0	0.00128	3.16676	31.646	9.09669
NH3	EU+_East	CZE	2008	0	0.463388	3.80415	0	0.0915287	1.18496	0.0791942	0.00719185	0	0	0	0.00963109	0.135334	32.5366	38.8293
NH3	EU+_East	HUN	2008	0.0011844	0.4477	2.76467	0	0.0912146	1.13221	0.0443728	0.00422965	0	0	0	0.00347999	0.842615	41.7755	32.1356
NH3	EU+_East	POL	2008	0	3.51857	7.25893	0	0.00928336	5.8124	0.275455	0.241335	0	0	0	0.0146358	4.2636	116.774	185.424
NH3	EU+_East	ROU	2008	0	1.13985	10.1347	0	0.141093	0.665125	0.134797	0.00160959	0	0	0	0.00572222	13.1098	85.9959	86.8395
NH3	EU+_East	SVK	2008	0	0.171306	1.90967	0	0.0323437	0.464989	0.0339426	0.00399001	0	0	0	0.00089254	0.634521	10.2485	19.2757
NH3	EU+_East	SVN	2008	0	0.133957	1.40692	0	0.0155625	0.614868	0.0274021	0.00288821	0	0	0	0.00108508	0.0368866	8.02318	9.49412
NH3	EU+_North	DNK	2008	0.0117753	0.748663	1.96751	0	0.0419977	1.96093	0.114399	0.000616248	0	0	0.0001534	0.00725701	0.583214	41.13	36.1301
NH3	EU+_North	EST	2008	0.120949	0.358112	0.075131	0.101834	0.007911	0.232174	0.0104612	0	0	0	0	0.000992	0.050759	4.24198	5.40176
NH3	EU+_North	FIN	2008	0.00201	0.684444	1.18414	0	0.285562	1.67493	0.0806361	0.00297691	0	0	0	0.00676498	0.476817	17.759	12.7556
NH3	EU+_North	ISL	2008	3.09214e-05	0.0276955	1.209e-06	0	0.00168163	0.13123	0.00298311	0	0	0	0	0	0.0025795	2.34868	2.80579
NH3	EU+_North	LTU	2008	0.259864	0.655349	1.76738	0	0.0239032	0.170946	0.0123145	0.0111231	0	0	0	0.000874834	0.529586	11.9736	14.8752
NH3	EU+_North	LVA	2008	0	0.214501	2.11347	0	0.0101595	0.214807	0.0142796	0.0031272	0	0	0	0.00184867	0.246615	7.25079	5.29344
NH3	EU+_North	NOR	2008	0	0.597539	0.0831899	0	0.0176349	1.33387	0.152717	0.285641	0	0	0	0.00533776	0.314049	11.4192	20.0265
NH3	EU+_North	SWE	2008	0.284788	2.77711	0.176007	0.00674313	0.0172723	3.60672	0.145729	0.00796027	0	0	0	0.00972152	1.25544	23.0083	25.6819
NH3	EU+_South	CYP	2008	0	0.00211579	0.00404443	0	0.00755579	0.295546	0.00521643	0	0	0	0	0.00015568	0	5.47327	1.5635
NH3	EU+_South	ESP	2008	0.0730284	26.9403	6.01981	0	0.433232	3.70271	0.736795	0.039651	0	0	0	0.0301849	6.53373	206.833	220.443
NH3	EU+_South	GRC	2008	0	0.890795	0.815228	0	0.242396	1.55179	0.0293797	0.00565038	0	0	0	0.0076082	0.0215693	24.4759	43.2683
NH3	EU+_South	HRV	2008	0.0111369	2.24609	2.88207	0	0.0639307	0.559294	0.0220491	0.0280631	0	0	0.000313914	0.00322314	0.631867	12.3959	23.2422
NH3	EU+_South	ITA	2008	0.19855	2.50724	1.88307	7.10545	0	10.235	0.98706	0.4992	0	0	0	0.0197764	7.09746	227.665	156.588
NH3	EU+_South	MLT	2008	0	0	0	0	0.00069815	0.0661419	0.000952754	0	0	0	0	0	0	0.992085	0.384704
NH3	EU+_South	PRT	2008	0.0145445	7.42371	2.03134	0.357588	0.121306	1.27297	0.189698	0.00185468	0	0	0	0.00126571	1.61845	20.6913	25.645
NH3	EU+_WestCentral	AUT	2008	0.312722	0.628498	0.573621	0	0.0566573	1.62415	0.226941	0.00916223	0	0	0.000771233	0.0162418	1.54626	28.4058	30.7383
NH3	EU+_WestCentral	BEL	2008	0.151399	1.70842	1.31966	0	0.23592	1.1581	0.325473	0.00561959	0	0	0	0.00388943	0.117595	37.7206	27.8728
NH3	EU+_WestCentral	CHE	2008	0.0352067	0.374077	0.119605	0	0.99533	3.09764	0.0580825	0.00118082	0	0	0	0.00334375	0.895112	26.0657	27.5005
NH3	EU+_WestCentral	DEU	2008	1.91707	13.6625	2.6893	0	1.32775	16.3753	1.26583	0.308776	0	0	0.143593	0.0701792	2.82084	275.949	332.264
NH3	EU+_WestCentral	FRA	2008	0.261904	6.74675	18.6453	0	0.0189444	6.51848	1.36853	0.107625	0	0	0	0.0322511	3.02855	246.975	324.308
NH3	EU+_WestCentral	GBR	2008	0.0636228	5.76691	1.09998	0	13.8597	11.8442	0.944601	0.226633	0	0	0	0.0407617	9.00086	102.622	113.446
NH3	EU+_WestCentral	IRL	2008	0	0.213473	0.0700894	0	0.0244037	1.97904	0.0942868	0.00912282	0	0	0	0.00219415	0.0230045	50.6976	56.5565
NH3	EU+_WestCentral	LUX	2008	0.00283746	0.0362475	0.0447124	0	0.0016134	0.0903733	0.0103874	0	0	0	0	0.0004547	0.0692017	2.4704	2.75929
NH3	EU+_WestCentral	NLD	2008	0.116864	2.08336	0.953536	0	9.64393	4.79511	0.318194	0.0427673	0	0	0	0.00995276	0.516743	67.9394	53.8522
NH3	NON_EU	ALB	2008	0.0106	0.0004	0.0659153	0	0	0.129	0.0142	0	0	0	0	0.0004	0	16.3128	0.441277
NH3	NON_EU	BIH	2008	0.0144	0.0026	0.332872	0	0	0.2166	0.0136	0.0024	0	0	0	0.0006	0	15.4934	0.573152
NH3	NON_EU	BLR	2008	0.1436	0.021	0.314728	0.001	0	0.687	0.023	0.0198	0	0	0	0.0182	0	92.8812	1.44994
NH3	NON_EU	KOS	2008	0.0064	0.0192	0.091496	0	0	0.0524	0.0066	0.0024	0	0	0	0.0004	0	3.7318	0.719828
NH3	NON_EU	MDA	2008	0.0186	0.0016	0.100121	0	0	0.0218	0.0022	0.0018	0	0	0	0.0018	0	14.2782	0.717309
NH3	NON_EU	MKD	2008	0.0104	0.0016	0.108377	0	0	0.0936	0.008	0.013	0	0	0	0	0	6.8304	0.318515
NH3	NON_EU	MNE	2008	0.0018	0.0048	0.0334136	0	0	0.0448	0.0032	0	0	0	0	0	0	1.4478	0.403406
NH3	NON_EU	RUS	2008	1.2422	20.2226	5.54954	0.0738	0	13.3076	0.1172	0.0798	0	0	0	14.7986	0	321.05	73.8883
NH3	NON_EU	SRB	2008	0.0392	0.3288	0.43097	0.0004	0	0.5152	0.0082	0.0822	0	0	0	0.0046	0	38.6542	11.25
NH3	NON_EU	TUR	2008	0.4656	0.0996	3.61961	0	0	1.2472	0.1356	0.425	0	0	0	0.1644	0	339.906	13.7293
NH3	NON_EU	UKR	2008	0.3072	7.3198	1.67424	0	0	2.9828	0.0322	0.0486	0	0	0	0.1232	0	207.431	41.485
NH3	EU+_East	BGR	2009	0	1.83826	1.91587	0	0	0.651516	0.103731	0.118178	0	0	0	0.001412	3.04001	29.7776	9.30761
NH3	EU+_East	CZE	2009	4.46e-05	0.379215	4.01773	0	0.0903024	1.1484	0.091902	0.00740353	0	0	0	0.00938691	0.0898844	30.5568	35.7207
NH3	EU+_East	HUN	2009	0.00122495	0.444297	4.12482	0	0.0977555	1.12854	0.0423277	0.0038916	0	0	0	0.00319005	1.00719	39.7019	30.4022
NH3	EU+_East	POL	2009	0	3.0707	7.26139	0	0.0100103	5.6581	0.319715	0.240307	0	0	0	0.0140845	3.92021	111.186	177.706
NH3	EU+_East	ROU	2009	0	0.756552	10.0224	0	0.12662	0.712846	0.174735	0.00149141	0	0	0	0.00451862	12.2467	82.3036	84.7732
NH3	EU+_East	SVK	2009	0	0.157988	1.7851	0	0.0227435	0.42801	0.0370971	0.00420129	0	0	0	0.000829703	0.616427	10.6491	19.0716
NH3	EU+_East	SVN	2009	0	0.126439	1.44614	0	0.016185	0.544567	0.0267408	0.00362822	0	0	0	0.000909382	0.0349735	8.07329	10.0679
NH3	EU+_North	DNK	2009	0.0110399	0.771805	1.88967	0	0.041039	1.80878	0.13303	0.000857898	0	0	0.000123596	0.00687763	0.627538	39.6033	33.8293
NH3	EU+_North	EST	2009	0.1259	0.187327	0.077501	0.0890737	0.011157	0.208731	0.0101084	0	0	0	0	0.000966	0.058264	4.34486	4.81256
NH3	EU+_North	FIN	2009	0.00714	0.84107	1.24998	0	0.155875	1.59782	0.0903157	0.00328437	0	0	0	0.00644696	0.47936	18.397	12.4422
NH3	EU+_North	ISL	2009	2.4096e-05	0.0110464	8.89875e-07	0	0.00156454	0.129782	0.00337513	0	0	0	0	0	0.00308441	2.39717	2.79647
NH3	EU+_North	LTU	2009	0.282522	0.677942	1.80217	0	0.0160683	0.142371	0.0105121	0.00898998	0	0	0	0.000665861	0.501828	11.8377	16.7909
NH3	EU+_North	LVA	2009	0	0.319429	2.33852	0	0.00824059	0.184406	0.0143494	0.00253982	0	0	0	0.00195215	0.221869	7.10498	5.56964
NH3	EU+_North	NOR	2009	0	0.43305	0.0848036	0	0.0178461	1.11118	0.162983	0.354282	0	0	0	0.00482411	0.339403	11.5965	19.3984
NH3	EU+_North	SWE	2009	0.316578	2.59612	0.182346	0.00640506	0.0179543	3.26966	0.174306	0.0107805	0	0	0	0.00872171	1.28776	22.3223	23.7961
NH3	EU+_South	CYP	2009	0	0.00203645	0.00255718	0	0.00840257	0.293129	0.00561983	0	0	0	0	0.000135936	0	5.41169	1.48548
NH3	EU+_South	ESP	2009	0.0575679	27.1333	7.15892	0	0.513126	3.38897	0.826897	0.0558728	0	0	0	0.0287744	4.52238	200.339	225.331
NH3	EU+_South	GRC	2009	0	0.712971	0.8219	0	0.392758	2.26925	0.0370839	0.00882102	0	0	0	0.0063906	0.00648576	24.0891	38.9712
NH3	EU+_South	HRV	2009	0.00847063	1.78283	2.91087	0	0.0470402	0.55277	0.0267798	0.0398099	0	0	0.000313914	0.00279546	0.627902	12.8929	22.0186
NH3	EU+_South	ITA	2009	0.181469	1.95206	1.81114	6.20328	0	9.24568	1.0613	0.521556	0	0	0	0.0193786	7.11483	228.364	143.775
NH3	EU+_South	MLT	2009	0	0	0	0	0.00047445	0.0545268	0.00082806	0	0	0	0	0	0.000259248	0.945049	0.364924
NH3	EU+_South	PRT	2009	0.0147876	5.84786	1.94518	0.339616	0.113196	1.23253	0.211138	0.00205937	0	0	0	0.00110888	1.58808	20.9158	24.4838
NH3	EU+_WestCentral	AUT	2009	0.329428	0.568281	0.563561	0	0.0580488	1.48413	0.248757	0.0121924	0	0	0.000723002	0.0150144	1.58424	29.0846	31.7906
NH3	EU+_WestCentral	BEL	2009	0.163093	1.31086	1.3807	0	0.235531	1.00708	0.346481	0.00501428	0	0	0	0.00362604	0.196818	37.5168	29.2127
NH3	EU+_WestCentral	CHE	2009	0.0374427	0.371954	0.118814	0	0.998035	2.85271	0.0681222	0.0016372	0	0	0	0.00305728	0.880297	26.2157	26.3162
NH3	EU+_WestCentral	DEU	2009	1.92578	12.8741	2.35817	0	1.15617	15.0865	1.36543	0.401629	0	0	0.13884	0.072536	2.86956	276.499	345.831
NH3	EU+_WestCentral	FRA	2009	0.337505	5.70671	19.2078	0	0.0176816	5.72874	1.48866	0.125	0	0	0	0.0301555	3.15635	243.084	319.564
NH3	EU+_WestCentral	GBR	2009	0.0629612	5.31982	1.19676	0	13.8261	10.6834	1.00952	0.287259	0	0	0	0.036929	9.76491	100.961	116.932
NH3	EU+_WestCentral	IRL	2009	0	0.210494	0.0797316	0	0.0233647	1.69943	0.0930799	0.00476122	0	0	0	0.00187373	0.0294862	50.1131	57.9578
NH3	EU+_WestCentral	LUX	2009	0.00354122	0.0279283	0.050156	0	0.00157992	0.0774801	0.0111932	0	0	0	0	0.000437484	0.0668699	2.44511	2.71384
NH3	EU+_WestCentral	NLD	2009	0.07906	1.84848	0.953473	0	9.59123	4.60145	0.344638	0.0422135	0	0	0	0.00983965	0.531661	68.2925	51.3345
NH3	NON_EU	ALB	2009	0.0138	0.0002	0.0653153	0	0	0.128	0.0156	0	0	0	0	0.0002	0	16.4784	0.443277
NH3	NON_EU	BIH	2009	0.0182	0.0028	0.326272	0	0	0.2158	0.0158	0.0032	0	0	0	0.0008	0	15.7542	0.573152
NH3	NON_EU	BLR	2009	0.1548	0.022	0.310928	0.001	0	0.752	0.026	0.0174	0	0	0	0.0186	0	94.2826	1.44994
NH3	NON_EU	KOS	2009	0.0082	0.0186	0.092696	0	0	0.0522	0.0068	0.0032	0	0	0	0.0002	0	3.6714	0.591828
NH3	NON_EU	MDA	2009	0.0228	0.0018	0.0979212	0	0	0.0264	0.0026	0.0024	0	0	0	0.0014	0	14.2066	0.721309
NH3	NON_EU	MKD	2009	0.0122	0.0018	0.106777	0	0	0.0928	0.009	0.017	0	0	0	0	0	6.6792	0.320515
NH3	NON_EU	MNE	2009	0.0024	0.0044	0.0332136	0	0	0.0454	0.0036	0	0	0	0	0	0	1.4254	0.373406
NH3	NON_EU	RUS	2009	1.1276	20.0688	5.48474	0.0674	0	14.8128	0.1276	0.0974	0	0	0	15.2248	0	301.371	77.3023
NH3	NON_EU	SRB	2009	0.0456	0.3294	0.42477	0.0002	0	0.4226	0.0086	0.1006	0	0	0	0.0048	0	39.3346	9.25217
NH3	NON_EU	TUR	2009	0.5878	0.0948	3.74981	0	0	1.0246	0.1528	0.566	0	0	0	0.1652	0	355.446	13.8453
NH3	NON_EU	UKR	2009	0.3476	7.1904	1.56324	0	0	3.4354	0.0346	0.0428	0	0	0	0.1246	0	209.031	43.0688
NH3	EU+_East	BGR	2010	0	3.31196	2.08623	0	0	0.634173	0.104651	0.123172	0	0	0	0.001268	2.74498	28.1215	10.3689
NH3	EU+_East	CZE	2010	0.000327	0.388618	4.11906	0	0.0886459	1.01973	0.101614	0.00718667	0	0	0	0.00917464	0.136704	29.754	35.2678
NH3	EU+_East	HUN	2010	0.00122739	0.354431	4.63624	0	0.0741188	0.994103	0.0400775	0.00333875	0	0	0	0.00352134	1.28253	39.9676	30.6713
NH3	EU+_East	POL	2010	0	3.50936	7.99131	0	0.0101674	5.52654	0.373376	0.240444	0	0	0	0.0140637	3.57683	110.026	172.107
NH3	EU+_East	ROU	2010	0	0.584611	10.4073	0	0.0786749	0.726897	0.209472	0.00127467	0	0	0	0.00464914	11.9063	73.7096	77.4914
NH3	EU+_East	SVK	2010	0	0.140376	2.0746	0	0.0369551	0.426015	0.0378088	0.00443121	0	0	0	0.000832726	0.534968	10.2943	19.1415
NH3	EU+_East	SVN	2010	0	0.141556	1.45208	0	0.0155625	0.486463	0.0270849	0.00432725	0	0	0	0.000824927	0.0326436	7.78087	9.7641
NH3	EU+_North	DNK	2010	0.0108028	0.706054	1.95923	0	0.0402623	1.63319	0.154833	0.00111448	0	0	0.000111256	0.00698705	0.608421	39.6623	34.7672
NH3	EU+_North	EST	2010	0.134177	0.212217	0.08361	0.114836	0.00696	0.191101	0.0110098	0	0	0	0	0.001196	0.054608	4.54988	4.61676
NH3	EU+_North	FIN	2010	0.00274	0.615586	1.36467	0	0.175929	1.49645	0.101795	0.00355859	0	0	0	0.00644582	0.485433	18.502	12.7921
NH3	EU+_North	ISL	2010	2.43177e-05	0.0145007	1.04587e-06	0	0.00144415	0.119211	0.00368881	0	0	0	0	0	0.00368545	2.32154	2.73536
NH3	EU+_North	LTU	2010	0.27901	0.477859	1.75767	0	0.0195336	0.099181	0.0112481	0.00727158	0	0	0	0.000690308	0.464961	12.2825	16.0724
NH3	EU+_North	LVA	2010	0	0.362637	1.77515	0	0.00747749	0.182145	0.0179474	0.0028809	0	0	0	0.00196915	0.250255	7.06105	5.97479
NH3	EU+_North	NOR	2010	0	0.521554	0.0947476	0	0.0163377	0.888772	0.172183	0.422635	0	0	0	0.0057179	0.34013	11.6478	19.2479
NH3	EU+_North	SWE	2010	0.367792	2.68706	0.183375	0.00658713	0.017946	2.93436	0.20728	0.0137929	0	0	0	0.00915911	1.23336	22.5148	24.3591
NH3	EU+_South	CYP	2010	0	0.00337832	0.0022185	0	0.00897417	0.285664	0.00620419	0	0	0	0	0.000140768	0.00117593	5.41881	1.5906
NH3	EU+_South	ESP	2010	0.151822	26.6387	7.21939	0	0.316206	2.87391	0.869492	0.071348	0	0	0	0.0278957	2.58868	190.499	227.477
NH3	EU+_South	GRC	2010	0	1.55491	1.05534	0	0.345138	2.05528	0.0338526	0.00850101	0	0	0	0.00555321	0.0316454	25.0189	43.5297
NH3	EU+_South	HRV	2010	0.0106593	2.72142	3.02243	0	0.0551078	0.500118	0.0304568	0.0502807	0	0	0.000188348	0.00260637	0.624518	12.3737	21.2438
NH3	EU+_South	ITA	2010	0.184019	1.86024	1.75989	6.01005	0	7.82311	1.10782	0.521131	0	0	0	0.0187495	7.04852	224.169	138.873
NH3	EU+_South	MLT	2010	0	0	0	0	0.000597	0.05359	0.00088458	0	0	0	0	0	0.00026586	0.913484	0.355327
NH3	EU+_South	PRT	2010	0.0154549	6.86272	1.85922	0.364459	0.134964	1.13407	0.22633	0.00217075	0	0	0	0.00107597	1.52921	20.8313	23.0917
NH3	EU+_WestCentral	AUT	2010	0.387218	0.587064	0.592582	0	0.0597202	1.39542	0.28242	0.0157914	0	0	0.000725333	0.0149677	1.57701	29.3196	31.4446
NH3	EU+_WestCentral	BEL	2010	0.181997	1.54624	1.62482	0	0.182157	0.829658	0.361035	0.00426472	0	0	0	0.00361711	0.191993	37.5595	28.2079
NH3	EU+_WestCentral	CHE	2010	0.0385588	0.358812	0.125207	0	1.00007	2.58879	0.0824356	0.00213293	0	0	0	0.00300472	0.872946	26.5364	26.1922
NH3	EU+_WestCentral	DEU	2010	1.95178	13.046	2.45647	0	1.23646	13.399	1.45205	0.482825	0	0	0.143312	0.0674348	2.84731	270.417	333.858
NH3	EU+_WestCentral	FRA	2010	0.350023	6.59087	21.603	0	0.0160092	4.88116	1.60167	0.139282	0	0	0	0.029163	3.43595	242.382	322.257
NH3	EU+_WestCentral	GBR	2010	0.0515404	5.9107	1.53866	0	14.1179	9.14348	1.04977	0.332024	0	0	0	0.0369739	9.6779	101.033	121.189
NH3	EU+_WestCentral	IRL	2010	0	0.229136	0.0749933	0	0.0209077	1.43658	0.0923385	0.000920328	0	0	0	0.00178814	0.0293722	48.9341	57.3525
NH3	EU+_WestCentral	LUX	2010	0.00353023	0.0319447	0.0515532	0	0.00160734	0.0681268	0.0125019	0	0	0	0	0.000427314	0.0649102	2.47385	2.72441
NH3	EU+_WestCentral	NLD	2010	0.0741679	1.74719	0.950204	0	10.0668	4.41719	0.373716	0.0423942	0	0	0	0.00931353	0.529288	64.9695	50.9639
NH3	NON_EU	ALB	2010	0.017	0	0.0647153	0	0	0.127	0.017	0	0	0	0	0	0	16.644	0.445277
NH3	NON_EU	BIH	2010	0.022	0.003	0.319672	0	0	0.215	0.018	0.004	0	0	0	0.001	0	16.015	0.573152
NH3	NON_EU	BLR	2010	0.166	0.023	0.307128	0.001	0	0.817	0.029	0.015	0	0	0	0.019	0	95.684	1.44994
NH3	NON_EU	KOS	2010	0.01	0.018	0.093896	0	0	0.052	0.007	0.004	0	0	0	0	0	3.611	0.463828
NH3	NON_EU	MDA	2010	0.027	0.002	0.0957212	0	0	0.031	0.003	0.003	0	0	0	0.001	0	14.135	0.725309
NH3	NON_EU	MKD	2010	0.014	0.002	0.105177	0	0	0.092	0.01	0.021	0	0	0	0	0	6.528	0.322515
NH3	NON_EU	MNE	2010	0.003	0.004	0.0330136	0	0	0.046	0.004	0	0	0	0	0	0	1.403	0.343406
NH3	NON_EU	RUS	2010	1.013	19.915	5.41994	0.061	0	16.318	0.138	0.115	0	0	0	15.651	0	281.693	80.7163
NH3	NON_EU	SRB	2010	0.052	0.33	0.41857	0	0	0.33	0.009	0.119	0	0	0	0.005	0	40.015	7.25437
NH3	NON_EU	TUR	2010	0.71	0.09	3.88001	0	0	0.802	0.17	0.707	0	0	0	0.166	0	370.986	13.9613
NH3	NON_EU	UKR	2010	0.388	7.061	1.45224	0	0	3.888	0.037	0.037	0	0	0	0.126	0	210.63	44.6526
NH3	EU+_East	BGR	2011	0	3.13468	2.19217	0	0	0.595134	0.105338	0.118713	0	0	0	0.001334	2.1983	26.5921	10.0525
NH3	EU+_East	CZE	2011	0.000458251	0.411091	4.22231	0	0.086672	0.946386	0.123289	0.00711527	0	0	0	0.00925568	0.116647	28.607	34.8877
NH3	EU+_East	HUN	2011	0.00121631	0.450382	5.37277	0	0.0786963	0.944021	0.0516256	0.00317171	0	0	0	0.00357547	1.61108	39.2842	31.5156
NH3	EU+_East	POL	2011	0	3.71407	8.13553	0	0.011014	5.14613	0.397493	0.232932	0	0	0	0.0141986	3.23344	108.154	174.903
NH3	EU+_East	ROU	2011	0	0.78087	9.22223	0	0.103249	0.702956	0.215759	0.00125466	0	0	0	0.00586084	11.5329	73.2165	77.5146
NH3	EU+_East	SVK	2011	0	0.237475	1.93975	0	0.0364557	0.35742	0.0445489	0.00397459	0	0	0	0.00084251	0.396969	9.55453	18.5241
NH3	EU+_East	SVN	2011	0	0.117998	1.45533	0	0.0158737	0.459376	0.0342882	0.00439357	0	0	0	0.000766833	0.0349654	7.43613	9.38044
NH3	EU+_North	DNK	2011	0.0141926	0.629679	1.77184	0	0.036817	1.47944	0.160714	0.00105345	0	0	9.80707e-05	0.00701133	0.588551	39.4905	33.6466
NH3	EU+_North	EST	2011	0.112208	0.234395	0.067281	0.175167	0.010528	0.179857	0.0140651	0	0	0	0	0.001091	0.040118	4.61562	4.5796
NH3	EU+_North	FIN	2011	0.00031	0.470918	1.16703	0	0.241459	1.36848	0.115499	0.004608	0	0	0	0.00619697	0.491073	18.1983	12.4075
NH3	EU+_North	ISL	2011	1.9125e-05	0.0220752	5.55e-07	0	0.00137072	0.107169	0.00392631	0	0	0	0	0	0.00345534	2.36077	2.76236
NH3	EU+_North	LTU	2011	0.257367	0.605369	1.71899	0	0.0364896	0.195873	0.0183399	0.0113722	0	0	0	0.000699604	0.457802	11.7986	15.9433
NH3	EU+_North	LVA	2011	0	0.413919	1.82603	0	0.00671005	0.172989	0.0208831	0.00279186	0	0	0	0.00210996	0.205503	6.94863	5.97811
NH3	EU+_North	NOR	2011	0	0.579093	0.0833289	0	0.0139517	0.772913	0.181851	0.384053	0	0	0	0.00567212	0.324504	11.3767	19.2471
NH3	EU+_North	SWE	2011	0.311298	2.62769	0.181267	0.00584422	0.0183308	2.43969	0.207096	0.01378	0	0	0	0.00879404	1.33942	21.9551	25.0392
NH3	EU+_South	CYP	2011	0	0.00232542	0.00204341	0	0.00733217	0.268746	0.00678862	0.000148506	0	0	0	0.000135592	0.00331891	5.27231	1.48715
NH3	EU+_South	ESP	2011	0.257096	26.5403	7.245	0	0.535586	2.60974	0.824475	0.0735244	0	0	0	0.0274313	2.5432	189.83	218.094
NH3	EU+_South	GRC	2011	0	3.39798	1.12483	0	0.10959	1.94451	0.0400282	0.00849236	0	0	0	0.00521858	0.0396353	24.7731	41.2798
NH3	EU+_South	HRV	2011	0.0120353	2.70892	2.84426	0	0.0484098	0.475267	0.0379202	0.0500317	0	0	0.000188348	0.00255796	0.621056	11.8038	23.3473
NH3	EU+_South	ITA	2011	0.198311	1.85155	1.13276	5.85033	0	7.10379	1.12387	0.513234	0	0	0	0.0170479	7.1356	222.215	144.722
NH3	EU+_South	MLT	2011	0	0	0	0	0.0019831	0.0509317	0.00133179	0	0	0	0	0	0.00023319	0.83031	0.306159
[truncated: 4,053 more rows]
